# Supplementary material for: Development of an Androgen Receptor Inhibitor Targeting the N-Terminal Domain of Androgen Receptor for Treatment of Castration Resistant Prostate Cancer
Source: Cancers (Basel). 2021 Jul 12;13(14):3488. doi: 10.3390/cancers13143488 (PMC8304761; doi:10.3390/cancers13143488)
Supplement: Supplementary file 1 [file cancers-13-03488-s001.zip › Ban_Supplementary Table1_RNAseq.xlsx]

## Sheet: DHTvsETOH
GeneName	baseMean	log2FoldChange	lfcSE	stat	pvalue	padj
TMPRSS2	8326.68	3.08167	0.109525	28.1366	3.4922e-174	5.42654e-170
NKX3-1	16393	2.76937	0.14458	19.1545	8.87659e-82	6.89667e-78
PMEPA1	5120.24	2.84144	0.163308	17.3993	8.35109e-68	4.32559e-64
IGF1R	1012.91	2.46826	0.158346	15.5878	8.80961e-55	3.42231e-51
CHRNA2	328.253	4.50747	0.318191	14.1659	1.48968e-45	4.62962e-42
SLC41A1	2400.82	1.55708	0.118926	13.0928	3.61904e-39	9.37271e-36
TWIST1	339.238	1.82693	0.142373	12.832	1.0855e-37	2.40966e-34
KLK2	5487.06	2.47245	0.193782	12.7589	2.78032e-37	5.40041e-34
SLC45A3	7555.6	2.36413	0.188807	12.5214	5.70377e-36	9.84788e-33
NCAPD3	203.667	2.37812	0.191082	12.4456	1.47844e-35	2.29734e-32
SGK1	280.321	3.89437	0.31753	12.2646	1.40352e-34	1.98266e-31
KCNN2	2869.28	1.30774	0.10819	12.0875	1.22944e-33	1.59202e-30
MAF	683.75	2.86638	0.242807	11.8052	3.67125e-32	4.38828e-29
CENPN	2790.6	1.86929	0.162415	11.5093	1.18383e-30	1.31397e-27
C1orf116	8019.69	1.89377	0.171089	11.0689	1.77475e-28	1.83853e-25
TUBA3D	111.893	3.22288	0.303682	10.6127	2.60166e-26	2.5267e-23
CYP2U1	805.698	1.3782	0.132238	10.4221	1.965e-25	1.79613e-22
FAM110B	210.602	2.06496	0.199454	10.3531	4.05239e-25	3.49834e-22
ERRFI1	959.881	1.71281	0.170566	10.042	9.96602e-24	8.15063e-21
PPFIBP2	838.203	1.23026	0.122776	10.0204	1.24023e-23	9.63594e-21
PLPP1	6216.43	1.41731	0.147352	9.61853	6.67814e-22	4.9415e-19
GREB1	412.877	1.97544	0.20671	9.55656	1.2174e-21	8.59872e-19
ZMIZ1	2879.75	1.12838	0.118306	9.53778	1.45925e-21	9.85883e-19
CCDC141	106.258	7.23748	0.773406	9.35792	8.13183e-21	5.26502e-18
CDYL2	1728.72	1.05864	0.113319	9.34208	9.4457e-21	5.87107e-18
TMCC3	83	3.83164	0.426552	8.98284	2.63877e-19	1.57707e-16
LAMA1	42.479	3.95855	0.455035	8.69944	3.33528e-18	1.91952e-15
TBX15	39.7472	4.36032	0.505759	8.62133	6.61788e-18	3.67269e-15
NEDD4L	4784.87	0.776268	0.0902662	8.59976	7.98826e-18	4.28033e-15
CAMKK2	4904.91	1.45542	0.17017	8.55276	1.20183e-17	6.2251e-15
TRIM49D1	102.578	3.27423	0.392573	8.34044	7.40149e-17	3.71005e-14
DEGS1	6211.3	0.787562	0.0948179	8.30605	9.89411e-17	4.80452e-14
F5	127.361	3.62677	0.438663	8.26779	1.36462e-16	6.42571e-14
BAMBI	687.234	-1.04168	0.12691	-8.208	2.24909e-16	1.0279e-13
TMEM79	553.992	1.52069	0.186015	8.17508	2.95677e-16	1.31272e-13
ABHD2	12274	0.835221	0.102798	8.1249	4.47716e-16	1.93252e-13
USP43	566.09	1.56186	0.193087	8.0889	6.02066e-16	2.52852e-13
WIPI1	220.365	1.38105	0.170849	8.08343	6.2969e-16	2.57494e-13
TBRG1	2141.77	0.871643	0.108538	8.03076	9.68694e-16	3.85962e-13
PER1	707.572	1.79394	0.224091	8.00541	1.19066e-15	4.62542e-13
SNAI2	52.7802	4.77667	0.603779	7.91128	2.54751e-15	9.65506e-13
GRB10	6432.65	-0.891547	0.112778	-7.90533	2.67231e-15	9.8869e-13
TSC22D1	5266.78	0.737992	0.094026	7.8488	4.20024e-15	1.51785e-12
RHOU	1211.69	2.38435	0.310496	7.67916	1.60129e-14	5.6551e-12
ENDOD1	6332.37	1.26302	0.166044	7.60655	2.815e-14	9.72052e-12
KLK3	31966.9	1.38938	0.183432	7.57434	3.60947e-14	1.2193e-11
C1orf21	2711.99	1.01702	0.134997	7.53367	4.9333e-14	1.63103e-11
TNFRSF10B	3152.09	0.757979	0.10075	7.52334	5.33954e-14	1.72856e-11
STEAP4	29.3414	6.25909	0.832873	7.51507	5.68809e-14	1.80382e-11
CHKA	831.442	0.596939	0.0804498	7.42002	1.17107e-13	3.63944e-11
TBC1D1	1938.98	0.847268	0.114355	7.40907	1.2719e-13	3.87529e-11
GRHL2	3137.49	1.45913	0.200333	7.28352	3.2521e-13	9.71816e-11
SLC25A33	2068.75	0.595657	0.0826806	7.20431	5.8337e-13	1.71037e-10
SLC39A7	145.757	24.5409	3.46148	7.08971	1.34397e-12	3.8674e-10
ANKH	2895.2	1.2052	0.170173	7.08222	1.41864e-12	4.00806e-10
CAMK2N1	4185.88	-0.612716	0.0866424	-7.07178	1.52958e-12	4.24432e-10
MOGAT2	35.1149	2.90239	0.418826	6.92982	4.21374e-12	1.14872e-09
SHROOM3	3383.07	0.74521	0.108365	6.87686	6.11841e-12	1.63921e-09
IRS2	172.37	2.1423	0.3155	6.79019	1.11983e-11	2.94932e-09
ZNF812P	65.5492	2.25102	0.334584	6.7278	1.72242e-11	4.46078e-09
MBOAT2	2184.13	1.5521	0.231728	6.69793	2.11389e-11	5.38489e-09
OTULINL	315.743	2.23976	0.334748	6.69087	2.21841e-11	5.47172e-09
PEX10	353.721	1.32079	0.19734	6.69298	2.18667e-11	5.47172e-09
SDC4	798.066	-0.955559	0.143269	-6.66967	2.56388e-11	6.22501e-09
TIGD6	483.537	0.90626	0.13602	6.66269	2.68862e-11	6.42745e-09
FOSL2	1342.94	0.706564	0.107471	6.57446	4.88287e-11	1.14962e-08
DLX1	32.5682	2.94693	0.449631	6.55411	5.59732e-11	1.29816e-08
SSBP2	581.961	-0.790837	0.122386	-6.46181	1.03456e-10	2.36413e-08
GUSBP1	259.997	-0.978154	0.15336	-6.37815	1.79242e-10	4.03659e-08
FAM174B	1888.8	1.16415	0.183071	6.35901	2.03064e-10	4.50774e-08
CSGALNACT1	169.241	1.99387	0.314236	6.34513	2.22239e-10	4.86391e-08
SLC2A3	32.6304	8.01246	1.26522	6.33287	2.40638e-10	5.19343e-08
NR4A1	367.436	1.31667	0.208161	6.32525	2.52826e-10	5.38172e-08
TMTC2	351.664	1.39039	0.22232	6.25401	4.00057e-10	8.40065e-08
FZD5	504.423	1.44256	0.230753	6.25152	4.06484e-10	8.42181e-08
TMEFF2	8836.54	0.609973	0.0977688	6.23893	4.40576e-10	9.00805e-08
OSR2	257.2	-1.26215	0.20421	-6.18066	6.38339e-10	1.2882e-07
CYTH1	823.128	0.926567	0.150872	6.14141	8.17898e-10	1.60877e-07
HOMER2	1569.45	0.796973	0.129745	6.1426	8.11816e-10	1.60877e-07
TIPARP	318.02	1.86419	0.303909	6.13404	8.5675e-10	1.66413e-07
PDE9A	1373.09	1.13142	0.185085	6.11296	9.77979e-10	1.84256e-07
PRR16	157.691	0.976665	0.159715	6.11506	9.65181e-10	1.84256e-07
ST3GAL1	8121.09	-0.551174	0.0901797	-6.11195	9.84184e-10	1.84256e-07
SLC38A4	27.7928	7.62283	1.2534	6.08174	1.18886e-09	2.19925e-07
ERN1	747.014	1.23919	0.204852	6.04921	1.45559e-09	2.66099e-07
KLHL29	215.766	1.00159	0.166479	6.01633	1.78418e-09	3.22377e-07
DYNLL2	6908.92	0.480862	0.0801838	5.99699	2.01003e-09	3.5901e-07
PIK3AP1	420.256	1.59715	0.267619	5.96799	2.40189e-09	4.24124e-07
WNT7B	1452.08	1.43148	0.24009	5.96225	2.48782e-09	4.34362e-07
IGFBP3	181.066	1.37451	0.233237	5.8932	3.78797e-09	6.54014e-07
LPAR3	1407.68	1.12943	0.1918	5.88857	3.89549e-09	6.65186e-07
ORM1	11.7054	7.39656	1.2709	5.81993	5.88729e-09	9.94376e-07
UBE2G1	2561.52	0.570228	0.0982761	5.80231	6.54084e-09	1.09288e-06
HMGXB3	3768.34	1.04005	0.179354	5.79884	6.67751e-09	1.10385e-06
VLDLR	402.555	0.966648	0.167163	5.78265	7.35336e-09	1.20278e-06
TRPM8	109.874	1.86111	0.322121	5.77768	7.57367e-09	1.22591e-06
GOLPH3L	2309.57	-0.779869	0.135796	-5.74294	9.3046e-09	1.49056e-06
NPPC	20.144	4.82846	0.843555	5.72394	1.04082e-08	1.65034e-06
EFCAB12	161.469	1.27675	0.223706	5.70728	1.14799e-08	1.80188e-06
PTPN9	1401.83	0.492256	0.0863903	5.69805	1.21186e-08	1.8831e-06
PRR15L	1338.21	0.821895	0.145014	5.66771	1.44719e-08	2.22652e-06
NDUFAF4	437.324	-0.690812	0.122527	-5.63803	1.72002e-08	2.62034e-06
ALPK2	24.3446	3.26031	0.579045	5.63048	1.79704e-08	2.71109e-06
CRISPLD2	224.65	1.1363	0.20217	5.62051	1.90397e-08	2.8177e-06
LINC01145	1199.88	0.542747	0.0965545	5.62115	1.89691e-08	2.8177e-06
KLF15	279.866	0.936507	0.166802	5.61449	1.97142e-08	2.88999e-06
ARL4C	105.76	1.072	0.194629	5.5079	3.63134e-08	5.27358e-06
HOXC13	322.74	-0.733327	0.133354	-5.49911	3.8172e-08	5.49218e-06
C19orf48	2103.41	1.11695	0.204152	5.47114	4.4716e-08	6.37469e-06
NFKB1	1027.64	-0.567312	0.103768	-5.46713	4.57385e-08	6.46119e-06
ELOVL7	411.851	1.59221	0.29317	5.43102	5.60341e-08	7.84427e-06
BTG1	5603.41	0.705349	0.131111	5.37978	7.45753e-08	1.03467e-05
NSMAF	758.252	0.682736	0.127168	5.36878	7.92728e-08	1.09011e-05
SPSB1	137.305	1.46956	0.274942	5.34498	9.04256e-08	1.23256e-05
KIF22	249	0.998549	0.186955	5.34111	9.23803e-08	1.24826e-05
TMEM184C	265.459	-0.818744	0.153989	-5.3169	1.05553e-07	1.41395e-05
OPRK1	534.099	-2.05581	0.38889	-5.28635	1.24778e-07	1.6572e-05
CBLN2	907.851	-0.872928	0.165517	-5.27393	1.3353e-07	1.75841e-05
KCNMA1	506.981	0.773073	0.147336	5.24699	1.546e-07	2.01877e-05
TNS3	53.3519	2.6939	0.519882	5.18176	2.19802e-07	2.82273e-05
SLC16A6	179.318	1.57555	0.304036	5.18211	2.19385e-07	2.82273e-05
ADRB2	332.821	0.721165	0.140168	5.145	2.67525e-07	3.40743e-05
AFF3	277.613	1.79824	0.350435	5.13146	2.87506e-07	3.63216e-05
LRIG1	212.44	1.67202	0.327281	5.1088	3.24208e-07	4.06279e-05
SP9	39.8254	1.86574	0.366911	5.085	3.67632e-07	4.57011e-05
LAT2	28.0202	2.01923	0.401507	5.02913	4.92722e-07	6.07651e-05
ABTB2	368.453	-0.746075	0.150388	-4.96099	7.01354e-07	8.58137e-05
ELL2	1042.94	1.40397	0.283866	4.94589	7.57955e-07	9.20146e-05
F2RL1	735.574	0.684989	0.139126	4.92353	8.49974e-07	0.000101977
SYBU	507.547	-0.578132	0.11744	-4.9228	8.53141e-07	0.000101977
PPP2R2A	5179.96	-0.50733	0.103097	-4.92091	8.61444e-07	0.000102183
RNF150	390.12	1.08629	0.221405	4.90634	9.27939e-07	0.00010923
TFEB	234.516	0.952808	0.194258	4.90487	9.34911e-07	0.00010923
PRKCA	340.361	1.14803	0.235863	4.86736	1.131e-06	0.000131154
TNFSF15	106.068	-1.31519	0.271881	-4.83736	1.31573e-06	0.000151446
DEPTOR	332.043	-0.976799	0.20207	-4.83396	1.33841e-06	0.000152923
KLF5	82.1986	1.80205	0.373027	4.83087	1.35939e-06	0.000154186
TGM2	17.0333	3.79045	0.790507	4.79496	1.6271e-06	0.000183214
GPRC5B	263.119	0.705359	0.147611	4.7785	1.76609e-06	0.000197434
PGC	16.2307	3.05143	0.64115	4.75931	1.94255e-06	0.00021561
CHST2	30.7243	1.92632	0.406005	4.74456	2.0896e-06	0.000230285
STK39	1648.48	0.885644	0.187093	4.73371	2.20451e-06	0.000241239
IL1RN	228.58	-0.834903	0.176431	-4.73219	2.22115e-06	0.00024136
FZD8	80.3599	1.18846	0.252959	4.69823	2.62421e-06	0.000283177
IL6R	973.734	0.620873	0.132408	4.68911	2.74399e-06	0.000294061
ST6GALNAC1	189.991	1.53888	0.330228	4.66006	3.16116e-06	0.000336447
MTMR9	923.961	1.26742	0.272062	4.65856	3.1843e-06	0.000336604
MAFB	1337.53	0.543644	0.117036	4.64509	3.39924e-06	0.000356897
EPN2	1295.53	0.509316	0.110126	4.62486	3.74853e-06	0.000390929
SOCS2	331.646	0.91448	0.198869	4.5984	4.25757e-06	0.000441056
PRIM2	458.839	0.627425	0.136495	4.59669	4.29246e-06	0.000441726
TTN	121.659	1.74465	0.380108	4.58988	4.43492e-06	0.000451216
ABCC1	1067.03	0.789533	0.17203	4.58952	4.44276e-06	0.000451216
LIFR	573.156	1.17483	0.256386	4.58227	4.59948e-06	0.000464099
SUSD6	1375.72	-0.596041	0.130391	-4.57118	4.84995e-06	0.000486216
ATXN2	1181.33	0.555178	0.121567	4.56684	4.95128e-06	0.000493192
MPZL1	3832.73	0.572317	0.125864	4.54709	5.43924e-06	0.000538346
PLA2G4E	8.61705	5.98286	1.3265	4.51025	6.47511e-06	0.000636815
GPR161	348.922	0.834388	0.186033	4.48515	7.28621e-06	0.000712078
EZR	2192.76	0.442127	0.0994459	4.4459	8.75228e-06	0.00085001
DGKK	7.59581	5.88894	1.32574	4.44201	8.91204e-06	0.00086015
HERC5	83.9578	1.3593	0.306251	4.43851	9.05851e-06	0.00086889
FAM107A	12.5656	2.80698	0.632839	4.43553	9.18455e-06	0.000875575
LAMC1	5222.6	0.570722	0.129299	4.41398	1.01489e-05	0.000961607
NFKBIA	60.7964	1.46982	0.334036	4.40019	1.08155e-05	0.00101856
GPR158	317.943	1.1773	0.267883	4.39482	1.10864e-05	0.00103778
TRIB2	15.3073	3.41935	0.779412	4.38709	1.14877e-05	0.00106891
MICAL2	1497.91	0.56634	0.129453	4.37486	1.21512e-05	0.00112392
GOLGA2P7	3259.1	0.445408	0.10211	4.36203	1.28862e-05	0.00118484
ACKR3	2486	-0.703376	0.162274	-4.3345	1.46092e-05	0.00133536
MAP7D1	2582.2	1.02762	0.237405	4.32854	1.50101e-05	0.00136399
MCCC2	10261.9	0.522403	0.120772	4.32554	1.52157e-05	0.00137464
AC092718.8	24.8041	1.89925	0.440148	4.31502	1.59587e-05	0.00143343
PACS1	2116.64	0.908748	0.211809	4.2904	1.78348e-05	0.00158363
NPC1	816.782	0.75033	0.174841	4.29149	1.77476e-05	0.00158363
SLC30A10	13.721	-2.47746	0.577799	-4.28776	1.80484e-05	0.00159349
LCP1	9079.61	0.475603	0.111132	4.27964	1.87198e-05	0.00164343
ANKRD16	226.966	-0.683429	0.160011	-4.27115	1.94469e-05	0.00169767
HSD17B7	775.257	-0.455472	0.107112	-4.2523	2.11586e-05	0.00183678
TPM1	1774.15	0.405412	0.09553	4.24381	2.19752e-05	0.00189707
RREB1	1348.39	0.472753	0.111561	4.2376	2.25921e-05	0.00193955
LRRFIP2	1448.03	0.850423	0.200788	4.23542	2.28126e-05	0.00194772
RARB	72.5445	1.22774	0.290618	4.22459	2.39372e-05	0.00202152
LRCH1	357.855	0.870943	0.206149	4.22481	2.39141e-05	0.00202152
LDLRAD3	491.589	0.623206	0.147809	4.2163	2.48345e-05	0.00208596
ILDR2	38.8848	-1.85807	0.44098	-4.21351	2.51437e-05	0.00210058
TNFAIP8	379.313	1.45763	0.348652	4.18076	2.90543e-05	0.0024143
TMEM164	1246.42	0.663808	0.158934	4.17662	2.95875e-05	0.00244554
EFNA5	1578.25	0.864966	0.209697	4.12484	3.7099e-05	0.00305017
C1orf115	1151	-0.400144	0.0977508	-4.09351	4.24895e-05	0.00347497
FBXO42	831.28	0.50622	0.124308	4.0723	4.65504e-05	0.00378715
FAT1	3019.64	0.806482	0.19824	4.06822	4.73745e-05	0.00383413
DUSP4	417.006	0.744972	0.183519	4.05938	4.92027e-05	0.00396145
HERPUD1	2438.05	0.680596	0.167851	4.05477	5.01837e-05	0.00401961
PTGER4	72.3619	1.62113	0.401111	4.04161	5.30849e-05	0.00423018
CACNG4	17.199	2.68196	0.664033	4.0389	5.37036e-05	0.00425765
ZNF18	294.21	0.538673	0.133592	4.03222	5.52533e-05	0.00435828
TNFAIP3	63.9313	1.4089	0.349569	4.0304	5.56811e-05	0.00436984
RAB27A	169.751	0.742619	0.184555	4.02384	5.72579e-05	0.00444865
KLHL36	1162.13	0.483502	0.120141	4.02445	5.71077e-05	0.00444865
DUSP27	169.652	0.879696	0.219379	4.00994	6.07344e-05	0.00469528
CDC42EP3	51.2658	1.59353	0.398709	3.99672	6.42261e-05	0.00494064
SLC22A23	1527.66	0.460718	0.115992	3.97199	7.12757e-05	0.00545593
RAB3B	1121.21	0.891695	0.224771	3.96712	7.27465e-05	0.00551578
COX11	127.894	-0.804761	0.202861	-3.96705	7.27675e-05	0.00551578
FKBP5	49.5635	3.56358	0.903143	3.94575	7.955e-05	0.00600062
FOXD4	62.482	1.4662	0.371748	3.94406	8.01145e-05	0.00601401
PMS2	2121.64	-0.530337	0.134705	-3.93703	8.24975e-05	0.00616312
FOXO1	218.466	0.64741	0.165316	3.91621	8.9953e-05	0.00668794
ALDH1A3	1117.32	1.04172	0.266345	3.91117	9.18507e-05	0.00679651
TUBA3E	17.8405	2.59033	0.664676	3.89713	9.73412e-05	0.00714468
JAG1	2213.12	0.940825	0.241436	3.89679	9.74756e-05	0.00714468
SMS	2845.84	0.355447	0.0924934	3.84295	0.000121566	0.00886859
RAB4A	403.049	0.645967	0.168309	3.83798	0.000124052	0.0090077
ELK4	77.1075	1.2207	0.318716	3.83005	0.000128119	0.00925974
MIR1915HG	6.6387	3.79756	0.996885	3.80943	0.000139288	0.0100203
SLC15A2	50.9829	1.74717	0.459222	3.80463	0.000142018	0.010123
PARP8	161.63	-0.987606	0.259506	-3.80571	0.000141397	0.010123
FAM118B	516.147	0.547118	0.144022	3.79885	0.00014537	0.0103146
GLMP	1166.71	0.591791	0.155908	3.79576	0.000147192	0.0103494
ABCA12	304.771	-0.833147	0.219474	-3.7961	0.00014699	0.0103494
TRIM38	369.415	-0.636319	0.167719	-3.79396	0.000148262	0.0103777
RALB	1164.58	-0.428761	0.113922	-3.76365	0.000167448	0.011616
GALNT3	296.609	-1.76475	0.468831	-3.76415	0.000167117	0.011616
SLC25A37	1528.77	0.498205	0.132599	3.75723	0.000171803	0.0118651
LAMA3	947.574	0.752355	0.20034	3.75539	0.000173073	0.0118999
DHCR24	24055.4	0.822207	0.219351	3.74837	0.000177989	0.012184
ZBTB43	741.186	-1.14834	0.30652	-3.74638	0.000179406	0.0122271
GPER1	164.92	-0.816057	0.218386	-3.73676	0.00018641	0.012649
TBC1D8	338.211	0.678231	0.181662	3.73347	0.000188861	0.0127479
RIPK4	1038.14	0.587025	0.157269	3.73261	0.000189507	0.0127479
TLL1	334.785	-0.953757	0.255846	-3.72786	0.000193116	0.0129346
AC010323.1	114.232	10.5217	2.82858	3.7198	0.000199379	0.0132968
PRKD1	3999.87	-0.620824	0.168074	-3.69374	0.000220976	0.0146741
AMIGO2	72.0526	-1.84655	0.501068	-3.68523	0.000228497	0.015109
THRB	1432.19	0.599688	0.163072	3.67745	0.000235578	0.0155112
OTULIN	49.8367	1.10208	0.300085	3.67256	0.000240136	0.0157446
ADH1C	18.1294	1.79932	0.492354	3.65451	0.000257669	0.0168232
ID3	139.749	-0.975214	0.26693	-3.65344	0.000258753	0.0168233
ZBTB10	1208.28	1.37482	0.376493	3.65165	0.000260559	0.0168701
RAMAC	640.152	0.418913	0.114792	3.64931	0.000262942	0.0169537
SORD	15007.1	0.451122	0.123802	3.64389	0.000268546	0.0172435
ZNF552	437.28	0.523848	0.143865	3.64124	0.000271325	0.0173503
MEX3D	591.285	0.483527	0.133195	3.63021	0.000283189	0.0180347
AKAP12	60.0333	1.6661	0.459237	3.62798	0.000285648	0.0181171
DUSP5	42.3036	-1.08022	0.299866	-3.60235	0.000315356	0.01992
ATP1A1	14607.1	0.467354	0.129941	3.59666	0.000322331	0.0202781
MYCL	220.839	0.604048	0.168585	3.58304	0.000339621	0.0212797
RAB6C-AS1	265.252	1.05502	0.294914	3.57739	0.00034704	0.0216573
ATRNL1	32.7349	1.24775	0.349699	3.56806	0.00035963	0.0222525
PCNX2	1151.62	0.532032	0.149147	3.56716	0.000360875	0.0222525
DNAJB5	380.28	0.457189	0.128113	3.56865	0.00035883	0.0222525
RIPOR2	2849.08	0.508541	0.142915	3.55836	0.000373184	0.0229087
HACL1	548.261	-0.551096	0.154913	-3.55745	0.000374466	0.0229087
PPFIBP1	703.157	0.921686	0.259361	3.55368	0.000379881	0.0231489
EGFR	1354.72	0.749715	0.211514	3.54452	0.000393333	0.023875
TLCD2	74.996	-9.02459	2.55208	-3.53617	0.000405974	0.0245464
PLPP5	1919.83	0.299568	0.0848315	3.53133	0.000413482	0.0249035
KLK4	2106.34	0.716968	0.203246	3.5276	0.000419352	0.0251055
IRF2BPL	4022.53	-0.362649	0.102816	-3.52714	0.000420068	0.0251055
CNKSR3	252.695	-0.572404	0.162363	-3.52547	0.00042273	0.0251678
MACIR	901.657	-0.916521	0.260784	-3.51449	0.000440602	0.0261317
GADD45G	273.027	0.596297	0.169914	3.5094	0.000449121	0.0265357
SPDEF	3058.86	0.988021	0.281779	3.50637	0.000454257	0.0266366
ZNF703	521.662	-0.722217	0.205927	-3.50715	0.000452934	0.0266366
SYNE2	858.941	-0.371023	0.106556	-3.48196	0.000497749	0.0289683
ASIC1	27.4565	-2.01106	0.577485	-3.48245	0.000496839	0.0289683
AL512310.7	3.34176	5.03643	1.45274	3.46684	0.000526608	0.0303072
EAF2	64.6713	1.53562	0.442915	3.46707	0.00052616	0.0303072
MICAL1	295.491	0.716736	0.206718	3.46722	0.000525873	0.0303072
ECI2	3673.57	0.607023	0.175386	3.46107	0.000538033	0.0308505
PHF8	390.249	0.753197	0.218226	3.45146	0.000557569	0.0318532
KCTD21	608.263	0.50061	0.145323	3.44481	0.000571452	0.0324541
CDK8	910.801	-1.04471	0.303303	-3.44443	0.000572265	0.0324541
MYRIP	387.667	-0.659956	0.191754	-3.44168	0.000578118	0.0326668
RAB32	392.134	0.710653	0.206651	3.4389	0.000584073	0.0328837
TLL2	83.6841	0.894893	0.260314	3.43774	0.000586581	0.0329057
HS3ST1	202.03	1.06249	0.309729	3.4304	0.00060269	0.0336878
C4B	17.8324	-2.78215	0.811865	-3.42687	0.000610589	0.0340069
BX842568.2	73.2213	-0.748405	0.218532	-3.42469	0.000615506	0.0341584
WHRN	220.021	0.665451	0.19498	3.41293	0.000642692	0.0355402
MFHAS1	698.019	0.541794	0.158828	3.41121	0.000646747	0.0356376
IL36G	16.2733	-2.23582	0.655803	-3.40929	0.000651313	0.0357624
OR7E47P	12.6589	1.82173	0.537657	3.38828	0.000703323	0.0384822
MCU	893.396	-0.561894	0.166213	-3.38057	0.000723355	0.0394393
DAPK1	35.913	-1.81125	0.535986	-3.37928	0.000726747	0.0394858
SMURF1	663.455	0.406757	0.120527	3.37482	0.000738649	0.0399926
C14orf132	400.514	0.490182	0.145675	3.36489	0.000765735	0.0413151
PLEKHM3	398.436	0.512531	0.152453	3.36189	0.000774096	0.0416217
NXF2B	8.91918	-5.95251	1.77885	-3.34627	0.000819079	0.0438885
HERC3	1002.87	0.963156	0.288605	3.33727	0.000846043	0.0450649
SLITRK3	185.72	-0.886904	0.265778	-3.33702	0.000846833	0.0450649
XPO6	352.994	0.65336	0.195923	3.33478	0.000853684	0.0452744
AGO4	473.851	-0.867237	0.260505	-3.32906	0.00087141	0.0460573
PPL	274.111	0.458739	0.138026	3.32357	0.000888738	0.0468139
NBEAL1	119.636	-1.39658	0.420576	-3.32063	0.000898153	0.0470073
PLD1	32.4375	-1.99223	0.599973	-3.32053	0.00089846	0.0470073
WWC1	1657.26	0.437039	0.131713	3.31812	0.000906252	0.0472559
RPL23AP7	104.006	-0.63823	0.192906	-3.30851	0.000937943	0.0487448
CBLL1	789.857	0.604414	0.182749	3.30735	0.000941843	0.0487843
ZHX2	495.164	0.461242	0.139553	3.30513	0.000949311	0.0490078
NBL1	8.19849	2.40479	0.728542	3.30083	0.000963988	0.049437
MAP3K6	461.024	0.532782	0.161385	3.30132	0.000962317	0.049437
GPR63	308.05	-0.916023	0.277698	-3.29863	0.000971576	0.0496622
RASSF5	123.448	-0.612906	0.186788	-3.28128	0.00103335	0.0526468
NETO1	6054.7	-0.41859	0.127608	-3.28028	0.00103702	0.0526611
KL	3.697	4.61996	1.41447	3.26621	0.00108996	0.0551689
CNTNAP2	59.983	0.998378	0.306249	3.26002	0.00111405	0.0562053
CC2D1B	1101.19	0.338953	0.104037	3.258	0.00112201	0.0564238
SLC36A1	334.83	0.732243	0.225254	3.25074	0.00115104	0.057697
UAP1	5386.11	0.644302	0.198328	3.24866	0.00115949	0.0578708
PAK2	3979.48	-0.450474	0.13869	-3.24806	0.00116196	0.0578708
TRPS1	129.549	-1.46618	0.45156	-3.24692	0.00116662	0.0579171
PSEN1	1857.79	0.322577	0.0993874	3.24565	0.00117183	0.0579905
NOSTRIN	5.28704	5.86785	1.8098	3.24226	0.00118585	0.0584983
CORO2A	772.419	0.408169	0.126705	3.22142	0.00127558	0.0627252
NXPE3	715.829	0.683424	0.212267	3.21964	0.00128353	0.0628316
ZNF589	379.564	0.420949	0.130765	3.21912	0.00128583	0.0628316
OR51E1	319.941	-0.960328	0.298481	-3.21738	0.00129366	0.0630161
TNFSF4	80.6302	0.936157	0.292121	3.20468	0.00135211	0.06525
AMOT	416.161	0.545984	0.170328	3.20548	0.00134836	0.06525
CHD4	3974.13	-0.336378	0.104914	-3.20624	0.00134481	0.06525
OR5B2	4.46245	4.59617	1.43501	3.20288	0.0013606	0.0654564
CDK7	356.882	-1.64608	0.514214	-3.20115	0.00136879	0.0656472
MRPS18A	1180.78	0.739851	0.231373	3.19765	0.00138552	0.066245
PAK1IP1	418.991	0.856419	0.268845	3.18555	0.0014448	0.0688672
MTMR7	4.33278	-4.65344	1.46203	-3.18286	0.00145828	0.0692972
TRIM35	574.24	0.401988	0.126449	3.17905	0.00147759	0.070001
WDFY2	382.568	0.843782	0.265825	3.1742	0.00150251	0.0709649
MIER3	121.372	-1.12694	0.355139	-3.17323	0.00150753	0.0709866
ABCF1	104.435	0.92815	0.292606	3.17201	0.00151386	0.0710691
PACSIN2	2697.03	0.259645	0.0821464	3.16076	0.00157356	0.0736493
VAV3	14.1607	-2.48489	0.786472	-3.15954	0.0015802	0.0737381
RNF43	409.956	-0.589811	0.187032	-3.15354	0.00161303	0.0745583
OCLN	580.729	-0.872202	0.276483	-3.15464	0.00160699	0.0745583
IRF1	59.2178	-0.939313	0.297837	-3.15378	0.00161168	0.0745583
AL441992.2	15.103	-2.6791	0.849746	-3.15283	0.00161697	0.0745583
AC009690.1	3.42203	-4.87995	1.55172	-3.14487	0.00166161	0.0763897
RTN4RL1	148.259	-0.658144	0.2097	-3.1385	0.00169813	0.0778387
NCKAP5	12.8849	-2.32729	0.742604	-3.13397	0.00172461	0.0788197
SMPD4	2323.87	0.326117	0.104253	3.12814	0.00175919	0.0799501
UGT2B15	171.803	-0.875902	0.280014	-3.12806	0.00175963	0.0799501
SLC25A20	512.559	0.389557	0.12472	3.12346	0.00178739	0.0809747
IRS1	240.726	1.06649	0.342328	3.11539	0.00183699	0.0829798
APLN	371.987	0.880419	0.282772	3.11353	0.00184861	0.0832483
NTNG1	137.447	0.834612	0.268129	3.11273	0.00185365	0.0832483
MEAK7	654.08	0.361321	0.116379	3.10471	0.00190467	0.0852931
MUC5B	7.76065	4.0578	1.30863	3.10081	0.00192993	0.0861756
RIC8B	365.007	0.376281	0.121482	3.09742	0.00195213	0.0868552
PCDH11Y	170.622	-0.716687	0.231429	-3.09678	0.00195632	0.0868552
VEGFA	1626.3	0.494204	0.160221	3.08452	0.00203884	0.0900043
KCNK5	55.9413	-0.824718	0.267358	-3.0847	0.00203757	0.0900043
TRGV9	3.24341	4.50164	1.46402	3.07485	0.00210605	0.0916778
CXXC5	941.507	-0.413953	0.134509	-3.07752	0.00208732	0.0916778
ZNF462	554.982	-0.476728	0.155042	-3.07483	0.00210625	0.0916778
TJP2	859.189	-0.486362	0.158154	-3.07525	0.00210325	0.0916778
HOXC9	76.821	-0.899313	0.292255	-3.07715	0.00208988	0.0916778
COL5A2	135.238	-0.96547	0.314142	-3.07335	0.00211668	0.0918744
TULP4	637.993	-1.01399	0.330995	-3.06346	0.00218794	0.094703
PTPN1	1335.47	0.39004	0.127393	3.0617	0.00220082	0.094996
PPP2CB	1830.39	0.395564	0.12938	3.05738	0.00223278	0.0961083
CCNI2	4.49381	-5.09979	1.67	-3.05376	0.0022599	0.0970073
ITPR1	351.445	-0.97107	0.318373	-3.0501	0.00228767	0.0979285
EFNB2	882.474	0.529006	0.173652	3.04636	0.00231629	0.0988816
ZC3HAV1	1815.93	0.406059	0.133445	3.04289	0.00234315	0.099659
CCNG2	1900.67	-0.881541	0.289756	-3.04236	0.00234733	0.099659
NOTCH2NLC	296.359	0.603121	0.198352	3.04065	0.00236066	0.0997465
PKIB	1181.19	-0.792231	0.260564	-3.04045	0.00236223	0.0997465
INKA2	224.097	-0.570934	0.18785	-3.03931	0.00237125	0.0998558
CNTNAP1	36.6773	0.946289	0.31303	3.023	0.00250286	0.105113
SP6	120.562	0.582638	0.192873	3.02084	0.00252073	0.105578
CSRNP3	19.1571	-1.46051	0.483615	-3.01998	0.00252792	0.105595
C18orf32	127.306	-0.788169	0.261608	-3.01279	0.0025886	0.107736
TAGLN2	17.1388	-4.81167	1.59736	-3.01227	0.00259304	0.107736
SLC35F2	1035.56	0.583675	0.194128	3.00665	0.00264143	0.109454
PDZRN3	212.232	0.666886	0.222158	3.00186	0.00268339	0.110897
OCRL	1637.84	0.248122	0.0830093	2.98909	0.00279812	0.115331
EPB41L3	9.57188	-2.4413	0.817209	-2.98736	0.00281394	0.115677
SLC45A4	246.807	0.539667	0.180807	2.98478	0.00283785	0.116352
MTERF4	976.119	0.342391	0.114858	2.98099	0.00287317	0.11749
DENND1B	391.368	-1.16777	0.392111	-2.97816	0.00289988	0.118271
RCN1	38.6609	-1.77378	0.59623	-2.97499	0.00293002	0.119187
SORD2P	914.032	0.421392	0.142004	2.96746	0.0030027	0.121825
RHOBTB2	569.679	0.879665	0.296672	2.96511	0.00302572	0.121863
FGFRL1	5814.54	0.61326	0.206789	2.96564	0.00302055	0.121863
PYM1	1588.82	0.285415	0.0962626	2.96496	0.00302717	0.121863
FAM189A2	46.7759	0.905017	0.305414	2.96324	0.00304415	0.121915
PEX13	424.816	-0.69528	0.234629	-2.96332	0.0030434	0.121915
NKAIN1	21.516	1.56867	0.529989	2.95982	0.00307823	0.122395
POP1	496.156	0.595369	0.201161	2.95966	0.00307976	0.122395
ID1	60.6468	-0.758194	0.256077	-2.96081	0.00306833	0.122395
GLUL	4451.51	0.450312	0.152218	2.95833	0.00309308	0.12261
RAB6D	65.6394	1.0361	0.350766	2.95381	0.00313878	0.123791
SLC38A9	321.181	-0.741309	0.250922	-2.95434	0.00313337	0.123791
FBXO15	52.0417	-1.65214	0.559804	-2.95129	0.00316451	0.12449
CHD7	306.081	0.841349	0.28517	2.95034	0.00317422	0.124556
HOXC12	482.868	-0.61607	0.209159	-2.94546	0.00322473	0.126219
KCNK13	28.4988	0.96773	0.329369	2.93813	0.00330198	0.128918
BRD2	1777.75	0.491754	0.167431	2.93705	0.00331351	0.129044
TSKU	692.629	0.641551	0.218726	2.93313	0.00335565	0.12971
ATMIN	2115.38	0.528872	0.180294	2.93339	0.00335282	0.12971
PITHD1	601.728	0.316153	0.107762	2.93381	0.00334834	0.12971
ABCC4	2364.13	0.96238	0.329011	2.92507	0.00344382	0.132459
ZNF697	172.021	0.748255	0.25578	2.92539	0.00344027	0.132459
DUXAP8	26.0115	-1.52553	0.521784	-2.92368	0.00345918	0.132721
ACP3	4856.93	-0.293934	0.100593	-2.922	0.0034779	0.133111
KCNS3	128.953	-0.481758	0.165287	-2.91467	0.00356068	0.135944
MARCHF5	1337.09	0.31435	0.107992	2.91086	0.00360434	0.137274
CYB5RL	489.405	-0.433202	0.148954	-2.90828	0.0036342	0.138073
RHOH	31.4277	-1.11359	0.383104	-2.90676	0.00365197	0.138409
SNN	1960.9	0.265881	0.091726	2.89865	0.00374779	0.141696
TRPV6	849.637	0.544789	0.188106	2.89618	0.00377737	0.142467
TSC22D3	847.964	-0.557987	0.192889	-2.89278	0.00381844	0.143668
TARS3	410.786	-0.730996	0.25283	-2.89126	0.00383702	0.144018
TCAF2	34.5263	1.03374	0.357717	2.88983	0.00385447	0.144076
FHDC1	273.652	0.457925	0.158472	2.88962	0.0038571	0.144076
ACSL3	2268.47	0.795679	0.275485	2.88828	0.00387352	0.144342
SVIL	397.53	-0.488541	0.16967	-2.87937	0.00398475	0.148132
ATXN7L1	205.86	-0.554724	0.192798	-2.87723	0.00401185	0.148783
AKNA	28.0647	-2.95642	1.03013	-2.86995	0.0041054	0.15189
NRARP	818.985	0.428043	0.149271	2.86755	0.00413657	0.15268
GADD45B	71.3298	0.891262	0.310892	2.86679	0.00414653	0.152685
FICD	332.219	0.654652	0.228441	2.86574	0.00416038	0.152833
ADPGK	1220.7	0.308686	0.107995	2.85832	0.0042589	0.156083
AL136295.5	62.4674	-1.38907	0.486156	-2.85726	0.00427322	0.156239
DIPK2B	42.7032	-0.781104	0.274195	-2.84872	0.00438959	0.159665
CHD9	219.764	-1.00311	0.352202	-2.84813	0.00439776	0.159665
ATP2B1	1586.33	-1.24321	0.436431	-2.84859	0.00439133	0.159665
MPC2	5405.89	0.387527	0.136356	2.84203	0.00448274	0.162371
NOTCH2	1544.79	0.265821	0.0936048	2.83983	0.00451383	0.162795
NCOA7	450.67	-1.29793	0.457065	-2.83971	0.00451539	0.162795
HPGD	25.8919	2.14541	0.757595	2.83187	0.00462765	0.166456
VCL	592.867	0.432596	0.153218	2.82339	0.00475186	0.170529
FEZF1	7.00134	-2.85076	1.01065	-2.82072	0.00479158	0.171558
L3MBTL3	103.712	1.12084	0.39797	2.8164	0.00485659	0.173197
TRIM68	2188.86	-0.283208	0.100564	-2.81619	0.00485963	0.173197
OSBPL10	88.1371	-0.741718	0.263454	-2.81536	0.0048723	0.173251
UBE2FP1	7.86945	2.46774	0.877719	2.81154	0.00493055	0.174524
TUBGCP4	180.6	0.552898	0.19662	2.81202	0.00492319	0.174524
RFFL	252.823	0.924547	0.329011	2.81008	0.00495288	0.174915
PCDH9	3.71484	3.62595	1.29147	2.80762	0.00499092	0.175859
SETBP1	807.757	0.414512	0.147745	2.80558	0.00502256	0.176574
CCND3	83.2435	1.22174	0.435645	2.80443	0.00504049	0.176804
TADA2B	1643.55	0.282658	0.100882	2.80187	0.0050808	0.177817
RFX3	133.194	-1.01976	0.364551	-2.79731	0.00515303	0.179939
MTCL1	258.533	0.544842	0.194981	2.79433	0.00520067	0.181196
BICD2	648.092	0.433437	0.155962	2.77912	0.00545067	0.189481
SLC43A1	1414.99	0.759152	0.273533	2.77536	0.00551404	0.190783
PCDH1	1009.72	0.646733	0.23306	2.77497	0.00552068	0.190783
CREB1	553.393	-0.656446	0.236581	-2.77472	0.00552497	0.190783
LY6G5B	26.8496	1.88858	0.680952	2.77344	0.00554673	0.19111
NUDT4P2	132.236	-0.871168	0.314318	-2.77162	0.00557788	0.191758
PACSIN1	516.783	0.445231	0.160709	2.77041	0.00559852	0.192043
ACACA	5890.03	0.427964	0.15462	2.76785	0.00564267	0.193131
TMEM191C	25.0864	1.65723	0.599692	2.76347	0.00571908	0.195316
ZNF680	202.674	-1.11246	0.402794	-2.76186	0.00574725	0.195847
BARD1	1625.51	-1.02143	0.37017	-2.75936	0.00579142	0.196921
GRIK2	108.127	-0.784949	0.284964	-2.75455	0.00587722	0.199402
GLI3	158.939	-0.827118	0.300399	-2.7534	0.00589795	0.199669
ADAMTS15	85.5808	0.639378	0.232435	2.75078	0.00594528	0.200834
AFF1	949.258	-0.52767	0.191922	-2.7494	0.00597044	0.201247
LINC00869	485.255	0.371649	0.135364	2.74555	0.00604099	0.202095
ZIC2	451.52	-0.345377	0.12574	-2.74676	0.00601878	0.202095
IRX3	379.123	-0.408687	0.148848	-2.74567	0.00603884	0.202095
NIPSNAP3B	4.08502	-3.6222	1.31947	-2.74519	0.00604762	0.202095
TMEM268	744.741	0.381435	0.139147	2.74124	0.00612083	0.204102
DISP2	137.732	1.37143	0.503186	2.72549	0.00642068	0.212143
UBE2E2	1193.11	0.262696	0.096413	2.72469	0.00643614	0.212143
ACSL1	4466.57	-0.296491	0.10875	-2.72634	0.00640415	0.212143
SOX9	41.8941	-0.859896	0.315616	-2.7245	0.00643986	0.212143
PIP5KL1	16.8754	-1.31087	0.480781	-2.72655	0.00640012	0.212143
NR4A2	11.0485	-1.46618	0.538186	-2.7243	0.00644388	0.212143
LINC00672	3.04272	-4.05146	1.48901	-2.72091	0.00651015	0.213872
ZNF554	23.6704	1.78344	0.656109	2.7182	0.00656376	0.215178
GLIPR2	313.653	0.39649	0.146001	2.71566	0.00661441	0.216382
PRKY	54.9238	-1.41888	0.524105	-2.70724	0.00678447	0.221479
TAPT1	700.36	-0.626711	0.231821	-2.70343	0.00686277	0.223565
ABLIM2	9.5567	1.87108	0.692842	2.70059	0.00692176	0.225015
STXBP5L	170.024	-0.872944	0.323574	-2.69782	0.00697948	0.226418
PWWP3B	4.03505	3.17466	1.17707	2.69709	0.0069948	0.226442
DIMT1	1021.59	-0.229987	0.0855279	-2.68903	0.007166	0.231502
MAP2	93.3743	0.835726	0.310995	2.68727	0.00720395	0.232245
TBL1X	2574.32	0.350264	0.130434	2.68537	0.00724497	0.233084
RAB15	207.848	0.811089	0.302337	2.68273	0.00730231	0.234444
MAPK7	460.86	0.461366	0.172153	2.67997	0.00736278	0.235897
MMS22L	120.357	-0.640803	0.2394	-2.6767	0.00743501	0.237722
EVA1B	217.058	0.654201	0.244658	2.67394	0.00749648	0.239195
TRIM49D2	28.7881	8.24321	3.08949	2.66814	0.00762718	0.242784
AP000526.1	47.99	1.25443	0.470251	2.66757	0.00764023	0.242784
SIN3A	1207.41	0.285516	0.107098	2.66594	0.00767738	0.243467
RALGAPA2	893.201	0.321116	0.120542	2.66393	0.00772334	0.244426
ODC1	18306.2	0.480587	0.180704	2.65952	0.00782511	0.246056
ARHGAP6	824.395	0.39482	0.148414	2.66027	0.00780783	0.246056
DAGLA	423.895	0.325157	0.122287	2.65896	0.00783819	0.246056
BLNK	87.6805	-0.755448	0.283993	-2.66009	0.00781188	0.246056
TEX2	730.3	0.47799	0.179879	2.65729	0.00787714	0.24678
TNK2	136.436	0.999512	0.376333	2.65593	0.00790907	0.247282
RGS16	65.0234	0.817409	0.30818	2.65238	0.00799266	0.248894
USP10	1199.88	0.358602	0.135174	2.65289	0.00798047	0.248894
GNA12	2185.89	0.296364	0.111861	2.6494	0.00806355	0.250599
EXPH5	147.287	-1.24507	0.471063	-2.6431	0.00821498	0.254796
ACTRT3	71.6178	-0.864984	0.327366	-2.64225	0.00823563	0.254927
ASAP2	624.601	-0.934991	0.354162	-2.64001	0.00829045	0.256114
SH3PXD2B	960.151	0.412495	0.156325	2.6387	0.00832255	0.256595
AC098582.1	310.839	1.18432	0.449145	2.63684	0.0083682	0.257492
TP53INP1	2757.18	-0.952663	0.361663	-2.63412	0.00843568	0.259055
KIAA1217	1304.37	-0.394068	0.149665	-2.63301	0.0084633	0.259391
IMPDH1	1642.91	0.608342	0.231278	2.63035	0.00852982	0.260915
SEC14L2	238.186	0.91984	0.349858	2.62918	0.00855898	0.261293
PDLIM5	1422.69	0.424895	0.161794	2.62615	0.00863572	0.263119
KDM4B	2442.9	0.434887	0.165866	2.62193	0.00874339	0.265878
ZNF461	89.9664	-0.841734	0.321238	-2.62028	0.00878584	0.266636
COLCA2	6.75311	-2.1094	0.80523	-2.61962	0.00880265	0.266636
TRIM27	196.247	1.48988	0.569142	2.61776	0.00885095	0.267578
TMEM100	2.234	4.13733	1.58344	2.61287	0.00897858	0.270909
DRC3	71.9119	-1.25217	0.479855	-2.60947	0.00906823	0.273084
CDCA7L	576.142	-0.318048	0.122191	-2.60288	0.00924434	0.277849
AC099548.2	17.3735	1.45762	0.560799	2.59919	0.00934439	0.2799
PRR5	469.066	0.502328	0.193324	2.59837	0.00936663	0.2799
SRGAP2	997.452	-0.392116	0.150901	-2.59851	0.00936303	0.2799
H2BP2	15.828	-1.45611	0.560982	-2.59564	0.00944137	0.281592
HELLS	128.743	-0.884501	0.341309	-2.59149	0.00955603	0.284466
SLC37A3	1003.08	-0.503203	0.194808	-2.58307	0.00979265	0.290952
ANGPT2	14.0945	1.81354	0.702675	2.58091	0.00985409	0.292219
HMGCR	2670.1	0.612437	0.237381	2.57998	0.00988064	0.292448
CHRM3	14.7026	1.65236	0.640872	2.5783	0.00992883	0.292759
PDZD2	24.2029	-1.40745	0.545833	-2.57854	0.00992187	0.292759
TRGC1	28.8318	1.2548	0.488465	2.56886	0.0102034	0.300069
EMP2	663.9	0.545551	0.212621	2.56584	0.0102926	0.300069
ELF3	665.444	-0.517592	0.201546	-2.56811	0.0102254	0.300069
RBM7	359.314	-0.675518	0.263183	-2.56672	0.0102665	0.300069
PEG3	526.069	-0.929091	0.362072	-2.56604	0.0102867	0.300069
MANEA	1046.32	-1.10098	0.428938	-2.56676	0.0102653	0.300069
LRRTM3	22.7943	-1.68266	0.655987	-2.56508	0.0103151	0.300161
AL109918.1	179.929	-0.648233	0.253011	-2.56208	0.0104049	0.302208
SLCO5A1	165.17	-0.5812	0.226942	-2.56101	0.0104368	0.302568
SPATA2	563.471	0.476972	0.186398	2.55889	0.0105006	0.303852
UBP1	2419.44	-0.456416	0.178439	-2.55782	0.0105331	0.304227
SLA2	10.404	1.66491	0.651409	2.55586	0.0105924	0.305372
NFIB	491.886	0.711894	0.278774	2.55366	0.0106596	0.306524
PTPRJ	611.837	0.497145	0.19471	2.55326	0.0106718	0.306524
KCTD16	2.23958	-4.06583	1.59403	-2.55066	0.010752	0.308258
FUT8	346.029	-0.733387	0.288044	-2.54609	0.0108936	0.311743
CDH7	5.37857	-2.41371	0.949436	-2.54225	0.0110141	0.314609
KIAA0408	11.409	-2.36794	0.932673	-2.53888	0.0111209	0.317079
GASK1B	1478.17	-1.20159	0.473443	-2.53798	0.0111495	0.317312
VIPR1	550.826	0.335995	0.132767	2.53072	0.011383	0.323365
APPBP2	1448.4	0.706254	0.279756	2.52453	0.0115852	0.328299
TULP3	838.94	0.279543	0.110749	2.52412	0.0115989	0.328299
ARHGEF28	18.7559	-1.17932	0.467756	-2.52122	0.0116949	0.330412
BCL2L14	6.43205	-2.21016	0.877687	-2.51816	0.0117969	0.332689
ZNF605	297.639	-1.04508	0.415547	-2.51495	0.011905	0.335131
EMP1	9.33138	3.26713	1.29997	2.51323	0.011963	0.335966
GPAT4	2210.8	0.346572	0.137923	2.51279	0.0119779	0.335966
CLSTN3	74.0023	-1.48244	0.590625	-2.50994	0.0120751	0.338081
CEP76	16.7085	-2.25646	0.900238	-2.50651	0.0121929	0.340764
TRIM53AP	3.86842	3.28574	1.31158	2.50518	0.012239	0.34144
ADAM7	58.1908	1.34742	0.538474	2.50229	0.0123391	0.343001
CPSF1P1	142.476	0.595104	0.237816	2.50237	0.0123363	0.343001
HEY1	27.6613	0.996749	0.398931	2.49855	0.0124702	0.345923
CDH26	3.84932	-4.44134	1.77794	-2.49802	0.0124888	0.345923
TIAL1	1788.98	-0.282106	0.113121	-2.49384	0.0126369	0.349403
CUL7	296.325	0.649373	0.26052	2.49261	0.0126809	0.349998
TCTN2	446.983	0.303513	0.121983	2.48815	0.0128409	0.353196
ALG2	1274.7	0.302714	0.121664	2.48811	0.0128423	0.353196
RNF13	142.777	-1.36762	0.550586	-2.48393	0.0129941	0.356741
TRAFD1	1357.53	0.310137	0.125099	2.47913	0.0131703	0.36094
HES2	30.098	1.69701	0.684809	2.47807	0.0132093	0.361373
WIPF1	2.87483	-3.48474	1.40697	-2.47676	0.0132581	0.362069
STARD13	102.393	0.83008	0.335602	2.47341	0.0133831	0.364842
AL669831.3	11.0456	1.54962	0.626891	2.47192	0.013439	0.365086
KLF4	96.4729	0.750194	0.303463	2.47211	0.0134317	0.365086
SYT6	2.55624	4.74904	1.92271	2.46998	0.0135122	0.365158
LPCAT4	184.265	-0.575438	0.232894	-2.47082	0.0134805	0.365158
RGS17	31.858	-1.09037	0.441352	-2.47051	0.013492	0.365158
GLUD1	4433.17	0.394524	0.15988	2.46762	0.0136015	0.366934
NUDT4	2827.08	-0.697885	0.282969	-2.4663	0.0136517	0.367649
LRRN1	22.3015	-1.18771	0.481915	-2.46457	0.0137179	0.368793
DOCK8	5.44326	3.31262	1.34498	2.46296	0.0137796	0.369812
ARL15	223.47	-0.747228	0.303644	-2.46087	0.01386	0.37133
HES6	1354.93	0.729562	0.296957	2.45679	0.0140185	0.374284
PIP4K2A	509.215	0.429968	0.174986	2.45715	0.0140043	0.374284
TOB2	1813.49	0.283812	0.115792	2.45105	0.014244	0.379652
SALL4	4.42351	-2.85012	1.16327	-2.45008	0.0142823	0.38002
FGF7P3	161.719	-0.89862	0.367099	-2.44789	0.0143694	0.381165
CYP4F62P	3.51832	-2.78485	1.13771	-2.44777	0.0143743	0.381165
RHBDL2	28.8486	-0.909087	0.371552	-2.44673	0.0144158	0.381613
GUCY1B1	6.44362	3.62963	1.48394	2.44595	0.0144471	0.381791
CYTH3	1847.65	-0.299047	0.122343	-2.44433	0.0145122	0.382213
PELI2	76.3135	-0.768687	0.314462	-2.44446	0.0145071	0.382213
MAN1A1	74.6949	-1.1959	0.490953	-2.43587	0.0148559	0.389986
CCDC110	34.6601	-1.40899	0.578441	-2.43583	0.0148576	0.389986
LMO4	378.547	-0.395009	0.162227	-2.43491	0.0148953	0.390318
TMC1	8.55633	-1.69848	0.697836	-2.43392	0.0149361	0.390727
NINL	56.2486	-1.11526	0.458564	-2.43208	0.0150124	0.392063
AL358113.1	21.6319	1.90172	0.782544	2.43018	0.0150915	0.393467
RANGAP1	275.459	0.549774	0.226409	2.42823	0.0151725	0.393697
MYH10	3525.77	-0.351368	0.14471	-2.42808	0.015179	0.393697
SENP8	160.136	-0.439796	0.181305	-2.42573	0.0152776	0.393697
PABPC5	129.934	-0.701589	0.28917	-2.42622	0.015257	0.393697
ZNF268	201.44	-0.93795	0.386406	-2.42737	0.0152088	0.393697
ROBO1	180.616	-1.03729	0.427619	-2.42573	0.0152776	0.393697
GPHN	66.5531	-1.10288	0.454178	-2.42829	0.01517	0.393697
IL17RA	114.876	0.675318	0.278498	2.42485	0.0153145	0.393995
RNF41	2600.27	0.475182	0.196281	2.42092	0.0154811	0.397621
SGMS1	691.146	-0.680482	0.281469	-2.4176	0.0156231	0.400296
C1DP1	6.7177	-2.23557	0.924827	-2.41729	0.0156367	0.400296
RRP15	424.057	-0.32226	0.133637	-2.41145	0.0158892	0.406089
CNTRL	32.4389	-1.00747	0.41809	-2.40969	0.015966	0.407382
LIN7B	54.3589	0.582117	0.241854	2.40689	0.0160889	0.409747
TRIP10	246.439	0.408388	0.16971	2.40638	0.0161114	0.409747
SMCO3	25.7374	-1.42694	0.593208	-2.40546	0.0161521	0.41011
CSPP1	2.46346	4.40783	1.83779	2.39844	0.0164652	0.415346
WWTR1	26.9586	1.73492	0.723127	2.39919	0.0164314	0.415346
ZFP2	13.1284	-1.37779	0.57436	-2.39883	0.0164474	0.415346
VN1R1	5.07405	-2.91656	1.21572	-2.39904	0.0164379	0.415346
FAM221A	63.6768	0.668878	0.278955	2.39779	0.0164941	0.4154
NR3C1	10.8267	-1.45016	0.605805	-2.39378	0.0166757	0.419295
CPSF6	1857.33	-0.212504	0.0888182	-2.39257	0.0167309	0.419325
TRIM66	223.688	-0.695587	0.29069	-2.39289	0.0167165	0.419325
IL22RA1	4.88718	2.83387	1.18498	2.39149	0.0167802	0.419884
DDX19B	331.379	0.383399	0.160396	2.39032	0.0168336	0.420543
LRRC3	282.766	0.394968	0.165287	2.38959	0.0168673	0.420707
PLK2	1213.76	0.406608	0.170211	2.38885	0.0169012	0.420879
TNRC18	1762.09	0.262524	0.110069	2.38508	0.0170754	0.424535
CAMSAP3	570.615	0.310634	0.13029	2.38417	0.0171176	0.424905
RMC1	24.9157	1.11643	0.469004	2.38043	0.0172923	0.428152
C2orf72	57.297	0.754795	0.317151	2.37992	0.0173164	0.428152
ANAPC1P2	143.659	-0.391423	0.164491	-2.37961	0.0173311	0.428152
SDR9C7	3.84543	2.76002	1.16142	2.37642	0.0174817	0.431188
SMOX	169.219	0.518986	0.218626	2.37386	0.0176034	0.433501
PNLIP	1.66014	4.1036	1.72959	2.37259	0.0176638	0.434301
ARRDC4	517.411	-0.566668	0.239497	-2.36608	0.0179778	0.441322
RASSF3	3291.69	0.68644	0.290304	2.36456	0.0180517	0.442437
ZNF385B	90.3629	0.82865	0.350924	2.36134	0.018209	0.44559
MPHOSPH9	179.763	0.812385	0.344207	2.36017	0.0182668	0.446301
PHLDB2	10.1382	2.09999	0.891945	2.35439	0.0185533	0.45188
FRMPD2	115.968	-0.616513	0.261827	-2.35466	0.0185397	0.45188
REPS2	1486.18	0.494649	0.210389	2.35111	0.0187173	0.455162
DGCR6L	11.5571	1.54299	0.657208	2.34779	0.0188851	0.457808
MID1	89.5042	-1.27262	0.542016	-2.34794	0.0188774	0.457808
ELMO2	1282.38	0.355311	0.151402	2.3468	0.0189353	0.458311
MICA	3.57982	5.33643	2.27548	2.34518	0.0190178	0.459592
SLC19A2	943.948	0.767734	0.327837	2.34182	0.01919	0.463034
INTS8	599.724	-0.787877	0.336579	-2.34084	0.0192405	0.463532
RNF24	804.023	0.311255	0.133023	2.33985	0.0192913	0.464037
ANKRD27	740.611	0.305766	0.130859	2.3366	0.0194601	0.467374
REXO2	1213.58	-0.342133	0.146581	-2.33409	0.0195911	0.469793
ATG101	1059.69	0.486442	0.2085	2.33306	0.019645	0.470361
PDIA5	972.344	0.410051	0.175898	2.33118	0.0197436	0.471994
CDK2AP1	2179.19	0.165818	0.0711678	2.32996	0.0198084	0.47209
AL109811.3	11.7918	-2.12862	0.913387	-2.33047	0.0197812	0.47209
MPV17L2	8.46137	-2.17673	0.93635	-2.3247	0.0200881	0.478022
BRSK1	23.0056	1.40346	0.60437	2.32219	0.0202225	0.480486
DZIP1	2.40376	5.19238	2.23864	2.31943	0.0203716	0.483127
RBBP8NL	247.335	-0.631494	0.272315	-2.31898	0.0203959	0.483127
KCNC4	2.13249	4.57933	1.9762	2.31724	0.0204905	0.484503
RNPC3	95.6705	-0.54094	0.233489	-2.31677	0.0205163	0.484503
PARD6G	255.48	0.430209	0.185747	2.3161	0.0205527	0.484625
TUBB8P7	6.83764	1.61901	0.699975	2.31295	0.0207252	0.486193
CNKSR2	66.9391	1.16003	0.501546	2.31291	0.0207277	0.486193
ERVMER34-1	125.964	-0.439345	0.189949	-2.31296	0.0207249	0.486193
SLC44A1	2020.02	-0.57309	0.247811	-2.31261	0.0207443	0.486193
NDRG1	102.698	1.23955	0.536566	2.31015	0.0208797	0.488629
RGS12	483.118	0.315961	0.13688	2.30832	0.0209816	0.490276
KDM5D	81.3222	-1.42157	0.616514	-2.30582	0.0211208	0.492786
JAKMIP3	128.44	-0.62698	0.272007	-2.30501	0.0211658	0.493097
CASP8AP2	38.1982	-1.24083	0.538684	-2.30344	0.0212541	0.494412
ARHGAP17	1088.05	0.214875	0.0933248	2.30244	0.0213102	0.494976
SPATA13	625.04	0.670533	0.291444	2.30073	0.0214071	0.495548
MAP3K9	631.551	0.282552	0.122846	2.30005	0.0214456	0.495548
PSAT1	7905.48	-0.242024	0.105239	-2.29975	0.0214624	0.495548
EPB41L4A	42.4751	-0.863364	0.375182	-2.30118	0.0213812	0.495548
GOLGA1	2.60122	5.94218	2.58581	2.29799	0.0215624	0.496382
MYO18A	1190.18	0.264875	0.115237	2.29852	0.0215321	0.496382
SPON2	28269	0.430974	0.187603	2.29727	0.0216036	0.496594
KLHL25	386.102	0.366113	0.159472	2.29579	0.0216881	0.497131
TBCE	450.338	-0.547693	0.23857	-2.29574	0.0216909	0.497131
KRT8	17636.9	0.55024	0.239821	2.29437	0.0217692	0.49819
RPL21P119	3.62613	-3.43497	1.49847	-2.29232	0.0218875	0.500161
OR8G3P	12.2008	1.75075	0.766903	2.28288	0.0224374	0.508471
DFFB	43.6871	1.36593	0.597696	2.28532	0.0222941	0.508471
DNAJB9	346.561	0.918699	0.402305	2.28359	0.0223957	0.508471
NT5DC3	276.303	0.612986	0.268533	2.28272	0.0224466	0.508471
PPP1R14C	166.852	-0.508943	0.222866	-2.28363	0.0223934	0.508471
HSF2	201.109	-0.688113	0.301445	-2.28271	0.0224475	0.508471
SEMA3C	562.75	1.01518	0.445297	2.27978	0.0226207	0.508555
HIPK2	2638.82	0.502849	0.220666	2.27878	0.0226803	0.508555
TP53I11	1819.85	0.486997	0.213639	2.27953	0.0226355	0.508555
TLE3	3821.56	-0.310509	0.136194	-2.2799	0.0226138	0.508555
ADORA2B	155.625	-0.383701	0.168218	-2.28097	0.0225503	0.508555
EML4	726.281	-0.602875	0.264526	-2.27907	0.0226627	0.508555
LSM14A	421.367	-0.999809	0.438174	-2.28176	0.0225034	0.508555
MAPKAPK5	716.072	-0.288499	0.126666	-2.27763	0.0227485	0.50935
ENOX1	195.772	-0.770166	0.338341	-2.2763	0.0228278	0.51039
RAB20	319.497	0.370948	0.163111	2.2742	0.0229537	0.5121
OSBP	4165.42	0.315615	0.13884	2.27323	0.0230124	0.5121
AC131902.2	145.036	-0.637718	0.28065	-2.27229	0.023069	0.5121
ODF2L	114.888	-0.928881	0.408783	-2.27231	0.0230678	0.5121
SDAD1P1	76.8157	-0.934257	0.410978	-2.27325	0.0230109	0.5121
BPNT1	1307.49	-0.231882	0.10215	-2.27003	0.023206	0.514406
ROR2	29.4346	-1.17756	0.519134	-2.26832	0.0233096	0.515965
ZCWPW1	70.8944	-0.545716	0.240725	-2.26696	0.0233925	0.517064
ESYT1	324.903	0.962027	0.424631	2.26556	0.0234784	0.518226
PTPRB	22.8086	-1.35125	0.597233	-2.26251	0.0236657	0.521619
GUCY1A1	1637.87	0.498475	0.220427	2.26141	0.0237339	0.522381
WNK1	3505.83	0.428638	0.189909	2.25707	0.0240038	0.525415
NEO1	1642.7	0.256064	0.113452	2.25702	0.024007	0.525415
MCC	55.8914	-0.616877	0.273273	-2.25737	0.023985	0.525415
MPP7	107.081	-0.876911	0.38846	-2.2574	0.0239829	0.525415
AC025165.3	31.2895	-1.71109	0.758568	-2.25568	0.0240904	0.526499
TPCN1	367.902	-0.465618	0.206589	-2.25384	0.0242065	0.528294
SMIM10L2B	182.052	0.471089	0.209106	2.25287	0.0242675	0.528881
AMPD3	3.75473	-2.92526	1.29924	-2.25151	0.0243532	0.530006
UNC80	42.2241	0.835396	0.371164	2.25075	0.0244014	0.530313
RNF115	811.529	0.253979	0.112885	2.2499	0.0244553	0.530741
C1QTNF3-AMACR	35.4195	-1.46418	0.651305	-2.24808	0.0245713	0.532514
ZNF92	23.5484	-2.90846	1.29413	-2.24742	0.0246134	0.532685
PDP2	14.8129	-1.48429	0.661362	-2.24429	0.0248139	0.536276
SNRPD3	2211.68	0.379864	0.169554	2.24037	0.0250667	0.539092
METTL25	141.973	-0.458339	0.204551	-2.2407	0.0250453	0.539092
PIK3R3	4054.29	-0.552835	0.246964	-2.23852	0.025187	0.539092
ZC3H8	123.939	-0.561614	0.250749	-2.23975	0.0251073	0.539092
MMP16	1720.96	-0.6509	0.290366	-2.24166	0.0249837	0.539092
S100A1	17.02	-1.0842	0.484209	-2.23912	0.025148	0.539092
TPBG	4.68066	-2.26944	1.01358	-2.23904	0.025153	0.539092
ATP8B1	59.9417	-2.18529	0.977382	-2.23586	0.025361	0.54207
PREP	1617.85	0.307445	0.137618	2.23405	0.02548	0.543865
KLF6	310.783	0.745862	0.334472	2.22997	0.0257493	0.548108
PLCB1	113.911	-1.25948	0.564788	-2.23	0.0257473	0.548108
MYL12B	371.537	-0.999812	0.448535	-2.22906	0.0258098	0.548644
BMF	330.53	-0.42522	0.190934	-2.22705	0.0259439	0.550741
HIVEP1	564.633	0.713899	0.320662	2.22633	0.0259921	0.551011
GLIS3	3.7302	4.07084	1.82963	2.22496	0.0260841	0.552208
GABPB2	265.77	-0.349174	0.156973	-2.22442	0.0261201	0.552218
DUSP7	521.615	0.217951	0.0980777	2.22223	0.0262679	0.554589
KCNC2	4.5542	4.2728	1.92414	2.22063	0.0263763	0.555368
FASN	27973.6	0.566277	0.254948	2.22114	0.0263411	0.555368
TNC	19.0395	1.22803	0.554133	2.21613	0.0266827	0.557795
ST3GAL2	396.644	0.62719	0.282909	2.21693	0.026628	0.557795
ANKRD37	178.079	0.457173	0.206327	2.21577	0.026707	0.557795
KIF20A	1212.72	0.335329	0.151284	2.21656	0.0266533	0.557795
TNFRSF21	412.04	-0.219086	0.0988145	-2.21714	0.0266134	0.557795
H2BC8	129.291	-0.43166	0.194776	-2.21618	0.026679	0.557795
TVP23C-CDRT4	69.3018	0.808703	0.365214	2.21433	0.0268061	0.559114
TGFB1I1	5.0805	2.9505	1.33374	2.21221	0.0269525	0.559341
ITPKA	8.72561	1.43204	0.647128	2.21291	0.0269036	0.559341
STK17B	179.103	1.18309	0.534832	2.21208	0.026961	0.559341
MYNN	440.958	-1.02667	0.463805	-2.21359	0.026857	0.559341
RASSF4	76.5132	0.624321	0.282331	2.21131	0.0270144	0.559702
LRRC7	25.8695	-1.01247	0.457995	-2.21066	0.0270597	0.559894
C6orf132	1066.14	0.449966	0.203825	2.20761	0.0272714	0.561367
TM2D2	1173.31	0.276717	0.125316	2.20815	0.0272339	0.561367
CABLES1	596.754	-0.275554	0.124823	-2.20755	0.0272754	0.561367
TCP11L2	50.443	-0.773629	0.350299	-2.20848	0.0272109	0.561367
CRYM	34.1035	0.740864	0.335797	2.20628	0.0273641	0.561445
MX1	71.269	-0.646936	0.293337	-2.20543	0.0274237	0.561445
ABCA1	20.2836	-1.48129	0.6715	-2.20594	0.0273884	0.561445
MSRA	4.30596	-2.61343	1.1843	-2.20673	0.0273331	0.561445
BCL2L1	3657.12	0.45317	0.206105	2.19873	0.0278969	0.570381
GRIK1	58.1586	-0.730236	0.333023	-2.19275	0.0283256	0.578386
KDM1B	43.312	-1.62054	0.739251	-2.19214	0.0283693	0.578518
CAPS2	51.0576	-0.807064	0.368805	-2.18832	0.028646	0.583395
TMEM140	806.793	-0.271	0.123989	-2.18567	0.0288397	0.58657
TMEM131L	316.672	-0.264957	0.121497	-2.18078	0.0291996	0.593115
KLK15	60.9313	0.773382	0.355021	2.17841	0.0293753	0.595903
PEA15	433.574	1.06621	0.490158	2.17524	0.0296118	0.59937
ZDHHC9	3439.82	0.498661	0.22926	2.17509	0.0296233	0.59937
CFAP20	844.89	0.297627	0.137118	2.1706	0.0299618	0.60543
DKC1	2522.67	-0.189387	0.0872833	-2.1698	0.0300222	0.605864
ORC5	866.856	0.514378	0.237439	2.16636	0.0302837	0.609557
KLHL24	348.974	-0.470183	0.217021	-2.16654	0.0302702	0.609557
AKAP13	316.816	0.458708	0.211918	2.16456	0.0304217	0.610674
CKS2	1100.73	-0.21103	0.0974793	-2.16487	0.0303979	0.610674
TBCK	103.063	-1.05137	0.485825	-2.16409	0.0304571	0.610674
KLHL28	22.7513	0.94423	0.436422	2.16357	0.0304972	0.610692
ZNF568	138.729	-0.702725	0.324903	-2.16288	0.0305506	0.610972
GMPPB	1213.56	0.252104	0.116832	2.15783	0.0309409	0.614325
DAB2IP	531.038	-0.299252	0.138536	-2.16011	0.0307645	0.614325
IL4R	156.568	-0.424186	0.196441	-2.15935	0.0308227	0.614325
SGSM1	68.5671	-0.781597	0.362141	-2.15827	0.0309071	0.614325
PLEKHS1	14.0577	-1.42342	0.659709	-2.15765	0.0309554	0.614325
AC021087.5	14.8627	-1.61574	0.748596	-2.15837	0.0308994	0.614325
PNRC1	58.2447	0.759356	0.35205	2.15696	0.031009	0.614603
RASL11B	30.8483	-0.744129	0.345397	-2.15442	0.0312074	0.616961
ASB3	13.2337	-1.83639	0.852381	-2.15443	0.0312068	0.616961
ENC1	939.732	-0.395451	0.183726	-2.15239	0.0313663	0.618836
SNRK	603.715	-0.67614	0.314163	-2.1522	0.0313819	0.618836
PLCXD3	8.41181	1.51532	0.70445	2.15107	0.031471	0.619807
AC016885.3	1.56794	3.98925	1.85647	2.14883	0.0316478	0.622027
SPOCK1	61.7909	0.722774	0.33653	2.14772	0.0317356	0.622027
SASH1	770.632	0.648267	0.30173	2.1485	0.0316737	0.622027
ADAMTS1	7075.12	0.301003	0.140177	2.14732	0.0317682	0.622027
LRRIQ3	7.33929	-1.44684	0.67385	-2.14712	0.0317838	0.622027
ENTPD6	2192.63	0.381977	0.178021	2.14568	0.0318982	0.623479
CHST10	580.693	0.292469	0.136479	2.14296	0.032116	0.626949
C9orf43	5.31459	3.32334	1.55429	2.13818	0.0325025	0.633696
C8orf34	14.5997	-1.00861	0.472147	-2.13621	0.032662	0.636009
CORO1C	98.6514	1.31674	0.61658	2.13555	0.0327157	0.636257
RGMB	55.6912	0.624809	0.292833	2.13367	0.0328698	0.637658
CTTNBP2NL	621.009	-0.629621	0.295047	-2.13397	0.0328456	0.637658
NXN	776.471	0.403893	0.189511	2.13124	0.0330696	0.640733
EIF4BP3	3.52557	2.31526	1.08688	2.13018	0.0331571	0.641614
ACOXL	4.0828	2.2899	1.07548	2.12919	0.0332389	0.641614
H2AC13	47.1797	-0.67473	0.316823	-2.12967	0.0331987	0.641614
ZNF442	61.7316	-0.848329	0.398892	-2.12671	0.033444	0.644771
GOLPH3	2818.29	0.334322	0.157372	2.1244	0.0336369	0.646588
CMC2	754.165	0.262111	0.123356	2.12483	0.033601	0.646588
AC138409.2	141.165	-0.455504	0.214447	-2.12409	0.033663	0.646588
SMAD7	204.682	-0.574621	0.270598	-2.12353	0.0337098	0.646687
APEX2	1224.26	0.432502	0.203799	2.1222	0.0338206	0.647215
FN1	4370.48	0.188101	0.0886206	2.12254	0.0337923	0.647215
ZNF586	350.432	0.383499	0.180784	2.12131	0.0338953	0.647846
ATF3	606.097	0.261185	0.123239	2.11933	0.0340622	0.648945
IKZF3	30.1311	-0.740373	0.349243	-2.11994	0.0340112	0.648945
IPCEF1	5.40301	-2.15934	1.01897	-2.11915	0.0340781	0.648945
SMC5	338.96	-0.991636	0.468371	-2.1172	0.0342426	0.65128
YTHDF1	1641.6	0.20219	0.0955804	2.11539	0.0343964	0.652608
ABCG2	4.70329	-2.16098	1.02151	-2.11548	0.0343891	0.652608
KCND2	23.7108	1.3434	0.635983	2.11232	0.0346591	0.654082
HSPA2	14.8351	0.937662	0.444427	2.10982	0.0348739	0.654082
FGD4	170.152	0.848535	0.401902	2.1113	0.0347468	0.654082
PRKAR2A	3412.2	0.274619	0.130268	2.10811	0.0350213	0.654082
C8orf76	403.499	0.238091	0.11284	2.11	0.0348587	0.654082
TSPYL2	1188.88	0.200264	0.0948729	2.11086	0.0347839	0.654082
TFG	2194.49	-0.190409	0.0903101	-2.1084	0.0349966	0.654082
PKD1P1	261.766	-0.677029	0.320992	-2.10917	0.0349295	0.654082
GTF2E1	507.371	-0.728321	0.345202	-2.10984	0.0348723	0.654082
ZFY	265.337	-0.808409	0.382934	-2.11109	0.0347642	0.654082
PGM2L1	46.2906	-0.846862	0.401674	-2.10833	0.0350025	0.654082
CENPC	67.3144	-0.989358	0.468308	-2.11262	0.0346332	0.654082
IFI30	11.8935	-6.52558	3.08704	-2.11386	0.0345268	0.654082
MOB3A	1083.45	0.413575	0.196381	2.10598	0.0352059	0.655879
FBXW11	2377.45	0.263836	0.125267	2.10618	0.0351886	0.655879
TAF1	50.0217	-0.916022	0.435053	-2.10554	0.0352442	0.655879
OBSCN	274.77	-0.729194	0.346502	-2.10444	0.0353398	0.656872
USP54	7740.16	-0.175217	0.0833271	-2.10276	0.0354868	0.658817
FAS	39.9792	-0.857839	0.408057	-2.10225	0.0355311	0.658852
FP565260.1	5.83164	-3.93356	1.87328	-2.09982	0.0357446	0.66202
TMEM39A	594.614	0.45745	0.218214	2.09633	0.0360525	0.666929
KLC3	125.927	0.511809	0.244219	2.0957	0.0361092	0.667183
CHD6	1893.57	-0.474518	0.226633	-2.09377	0.0362803	0.669548
NPIPA9	217.554	0.540361	0.258482	2.09052	0.0365711	0.674102
TBC1D16	4284.04	0.341641	0.163461	2.09004	0.0366138	0.674102
TRMT44	262.635	-0.317276	0.151905	-2.08865	0.0367391	0.675607
TMEM38B	690.183	-0.572719	0.274318	-2.08779	0.0368163	0.676228
RUNX1	37.3254	1.23487	0.591614	2.08729	0.0368622	0.676271
LYPLA2	939.545	0.367933	0.176448	2.08522	0.0370495	0.678906
RNF114	2149.66	0.407437	0.195631	2.08268	0.0372805	0.682334
SNRNP40	1672.4	0.260939	0.12537	2.08135	0.0374015	0.683744
KLC2	481.655	0.36878	0.177233	2.08077	0.0374553	0.683922
ELOVL5	6334.71	0.362926	0.174582	2.07883	0.0376332	0.68556
COLEC12	293.967	-0.602029	0.289592	-2.07889	0.0376278	0.68556
SRSF8	3239.49	0.19526	0.0940563	2.07599	0.037895	0.687106
FNDC3B	500.367	-0.253244	0.121965	-2.07637	0.0378594	0.687106
ESF1	82.1521	-1.06406	0.512218	-2.07736	0.037768	0.687106
RPGR	18.1403	-2.67029	1.2858	-2.07675	0.0378244	0.687106
ACTR6	283.928	-0.865345	0.41714	-2.07447	0.0380354	0.687246
SGO2	73.6312	-1.05931	0.510615	-2.07457	0.0380265	0.687246
CP	4.422	-2.42358	1.16783	-2.07529	0.0379595	0.687246
PLGLB1	6.98727	-2.03254	0.980888	-2.07214	0.0382523	0.690362
MMP13	9.84636	-1.40403	0.677773	-2.07154	0.0383087	0.690578
SRGAP3	249.861	-0.454154	0.219318	-2.07076	0.0383817	0.691093
THRAP3	5864.56	0.442296	0.213643	2.07025	0.0384288	0.691139
RFX6	5.44612	2.00671	0.969639	2.06954	0.0384955	0.691539
TMEM132B	5.29644	3.81767	1.84637	2.06766	0.0386722	0.691695
DUSP10	144.422	0.523913	0.253398	2.06755	0.0386822	0.691695
SFTPA2	5.32533	-3.01058	1.45517	-2.06889	0.0385567	0.691695
USP41	4.97922	-6.71175	3.24569	-2.0679	0.0386496	0.691695
AK4	3606.22	0.229042	0.110806	2.06706	0.0387288	0.691732
ZNF17	92.5186	-0.64964	0.31483	-2.06346	0.0390687	0.697001
PIGA	182.038	-2.87417	1.39478	-2.06066	0.0393352	0.700951
MARCHF3	99.5538	0.692148	0.336045	2.05969	0.0394285	0.701809
KEL	1.49998	4.76362	2.31612	2.05673	0.0397124	0.702837
RNF152	28.5441	1.79197	0.871035	2.05728	0.0396589	0.702837
SORBS1	146.082	-0.410145	0.199373	-2.05718	0.0396687	0.702837
SLFN5	538.431	-0.555564	0.270037	-2.05736	0.0396514	0.702837
CFAP69	226.424	-0.769117	0.373893	-2.05705	0.0396815	0.702837
TACC2	2094.68	0.305945	0.148966	2.05379	0.0399961	0.704648
YWHAH	1316.04	0.187871	0.0914465	2.05444	0.0399332	0.704648
PRKAA1	2123.28	-0.481799	0.234546	-2.05418	0.0399587	0.704648
CEP152	48.8473	-0.983993	0.478841	-2.05494	0.0398843	0.704648
AC092718.3	110.957	0.568217	0.276928	2.05186	0.0401834	0.707146
DOCK9	511.321	-0.572046	0.279171	-2.04909	0.0404533	0.71109
SYTL2	106.441	-1.04869	0.511986	-2.04827	0.0405334	0.711692
LRRC23	233.022	0.430453	0.210393	2.04595	0.0407617	0.714254
HS6ST1	1748	0.204996	0.100201	2.04585	0.0407712	0.714254
KCNH2	68.4389	0.659213	0.322614	2.04335	0.0410181	0.717771
SELENOS	980.067	0.223388	0.109361	2.04268	0.0410845	0.718124
AC098934.1	29.1761	0.740742	0.363121	2.03993	0.041357	0.718781
PLA1A	44.3092	0.641421	0.314574	2.03901	0.0414488	0.718781
PADI2	110.667	0.472648	0.231798	2.03905	0.0414447	0.718781
MAOA	2015.58	0.292623	0.143575	2.03812	0.0415384	0.718781
FECH	4072.72	0.245132	0.120099	2.04108	0.0412424	0.718781
LYPLAL1	803.296	0.234781	0.115108	2.03965	0.0413849	0.718781
ANKRD12	123.962	-0.923012	0.452413	-2.0402	0.0413306	0.718781
AL117339.4	16.0334	-1.11785	0.547574	-2.04145	0.041206	0.718781
LRRC8B	233.467	-1.13304	0.555853	-2.03838	0.0415116	0.718781
PRDM4	893.178	0.306959	0.150688	2.03705	0.0416451	0.719025
SMAD1	395.51	-0.553269	0.271553	-2.03743	0.0416074	0.719025
PPP4R1L	28.0541	1.06378	0.522639	2.0354	0.0418103	0.721077
RPAP3	355.239	-0.609082	0.299463	-2.03392	0.0419601	0.722859
HEBP2	2341.16	0.285418	0.140491	2.03157	0.0421971	0.725332
PHOSPHO2	95.4067	-0.511689	0.251845	-2.03176	0.0421779	0.725332
RPL3L	23.7966	0.725283	0.357402	2.02932	0.0424258	0.72759
WNK3	137.403	-0.735108	0.362271	-2.02917	0.0424413	0.72759
PCDH11X	3.82644	-2.43802	1.20165	-2.0289	0.0424689	0.72759
PRKG2	32.4562	-1.19759	0.590524	-2.02802	0.0425583	0.728319
SCAP	2916.7	0.499762	0.246634	2.02633	0.0427309	0.730467
NBAS	747.193	0.238817	0.117913	2.02536	0.0428305	0.730708
SOGA1	3379.11	0.187141	0.0924029	2.02528	0.042839	0.730708
MYRF	41.8495	1.16744	0.576813	2.02396	0.0429747	0.732219
PCDHGA3	3.92647	6.36017	3.14381	2.02308	0.043065	0.732954
MTIF2	94.9036	1.13207	0.56045	2.01993	0.0433909	0.736987
PRRC1	603.876	0.448785	0.222185	2.01987	0.0433968	0.736987
GTF2E2	1244.89	0.221327	0.10962	2.01904	0.0434833	0.737649
TMEM198B	565.253	0.273997	0.135884	2.01641	0.0437575	0.740462
SESN1	3236.52	-0.512915	0.254494	-2.01543	0.0438593	0.740462
TASOR2	1130.16	-0.630203	0.312645	-2.01572	0.0438298	0.740462
AC105052.1	7.81493	-2.43385	1.20717	-2.01615	0.0437839	0.740462
RPL21P120	1.62308	-3.53997	1.75666	-2.01517	0.0438873	0.740462
SSX2B	2.66159	4.15186	2.06084	2.01465	0.0439416	0.740574
PPAN-P2RY11	50.9163	-0.710259	0.352842	-2.01297	0.0441181	0.742742
KRT19	22.9174	0.91216	0.453285	2.01233	0.0441848	0.743059
NFIL3	334.897	0.354586	0.176256	2.01177	0.0442439	0.743059
STK38	886.964	-0.211017	0.104998	-2.00972	0.0444609	0.743059
WDR3	1746.75	-0.340865	0.169731	-2.00827	0.0446151	0.743059
OARD1	311.569	-0.403696	0.200847	-2.00997	0.0444345	0.743059
SLC12A6	692.974	-0.474857	0.236441	-2.00835	0.0446063	0.743059
NET1	602.665	-0.598065	0.297749	-2.00862	0.0445771	0.743059
PUS10	110.016	-0.67332	0.334812	-2.01104	0.044321	0.743059
SRCIN1	63.6265	-0.706784	0.351784	-2.00914	0.0445221	0.743059
ZNF567	49.2828	-0.98842	0.49179	-2.00984	0.0444477	0.743059
ZNF689	8.88885	1.62937	0.812196	2.00612	0.044843	0.7437
GNB4	234.474	1.00995	0.503827	2.00457	0.0450095	0.7437
GHR	491.734	0.670026	0.334468	2.00326	0.0451497	0.7437
DUXAP10	1898.59	0.493099	0.246229	2.00261	0.0452196	0.7437
ACSM1	52.846	0.491996	0.245493	2.00412	0.0450577	0.7437
SFXN2	902.569	0.392898	0.196199	2.00255	0.0452252	0.7437
ZNF316	867.142	0.353859	0.176623	2.00347	0.045127	0.7437
ERVK3-1	937.458	0.343515	0.171401	2.00416	0.045053	0.7437
ACTR1B	48.2605	-0.523479	0.261409	-2.00253	0.0452279	0.7437
NSUN6	124.249	-0.551798	0.274979	-2.00669	0.0447822	0.7437
RBM41	100.167	-0.708102	0.352954	-2.00622	0.0448331	0.7437
PLCL2	14.0427	-1.05354	0.525732	-2.00395	0.0450757	0.7437
ATP6V1C2	25.0395	0.864726	0.431934	2.00199	0.0452862	0.743872
SYTL4	127.595	-1.01273	0.506217	-2.00059	0.0454369	0.745559
NAPSA	3.06062	-2.3517	1.17577	-2.00013	0.0454859	0.745576
EML3	207.691	0.469742	0.235004	1.99887	0.0456228	0.747031
MRPL50	493.905	-0.414135	0.207548	-1.99537	0.0460022	0.75245
DAXX	722.005	0.405604	0.203474	1.9934	0.0462178	0.755182
CRBN	496.758	-0.539373	0.270716	-1.99239	0.0463278	0.755348
SPTLC3	233.598	-0.614006	0.308153	-1.99253	0.0463126	0.755348
TRABD2B	20.0335	-1.61784	0.812178	-1.99198	0.0463738	0.755348
CNOT2	1000.11	-0.445367	0.223708	-1.99084	0.0464987	0.756589
PHF12	3995.03	-0.247016	0.124163	-1.98946	0.0466509	0.758272
LINC02693	227.902	-0.443214	0.222934	-1.9881	0.0468005	0.759909
DICER1	149.306	-0.870334	0.437987	-1.98713	0.0469085	0.760868
HRH2	5.40571	1.75412	0.883427	1.98559	0.047079	0.762043
CYRIA	74.9111	0.772813	0.389136	1.98597	0.0470366	0.762043
TUSC1	177.805	-0.308142	0.155334	-1.98374	0.0472854	0.762861
FIP1L1	680.934	-0.337205	0.16993	-1.98438	0.0472137	0.762861
LSM11	169.838	-0.38425	0.193709	-1.98364	0.047296	0.762861
TGM3	216.788	-0.564356	0.284589	-1.98305	0.0473615	0.762861
LTN1	118.937	-1.27037	0.640654	-1.98293	0.047375	0.762861
SCFD1	460.314	-0.810339	0.408752	-1.98247	0.0474263	0.762896
BHLHA15	173.019	0.760453	0.383781	1.98148	0.0475377	0.763897
CALR	90.9674	0.60084	0.303476	1.97986	0.0477192	0.766021
PLEKHO2	254.51	0.439834	0.222226	1.97922	0.0477911	0.766384
FCGBP	94.6298	0.657658	0.332519	1.97781	0.0479505	0.767985
TP53TG3B	83.6232	0.442069	0.223554	1.97746	0.0479898	0.767985
CRY2	554.809	0.315447	0.159604	1.97643	0.0481063	0.768597
KIF18A	37.9477	-0.996998	0.504491	-1.97625	0.0481269	0.768597
MALT1	794.128	0.831495	0.420846	1.97577	0.0481805	0.768663
ASIP	3.33377	2.41913	1.2249	1.97497	0.0482718	0.769328
MROH8	14.6011	1.36592	0.692989	1.97106	0.0487167	0.774038
GLYATL1P1	24.1176	0.83228	0.422221	1.9712	0.0487015	0.774038
RPS6KA2	1807.74	0.231737	0.117549	1.97141	0.0486768	0.774038
SART3	1694.42	-0.202336	0.102686	-1.97044	0.0487874	0.77437
SPTLC2	21.7712	6.01403	3.05432	1.96902	0.0489503	0.776162
AC011511.1	14.9453	-1.14192	0.580383	-1.96752	0.0491232	0.778109
ANTXR2	89.0876	1.21268	0.616887	1.96581	0.0493208	0.780444
SMAD6	221.131	0.346074	0.176125	1.96493	0.049422	0.781249
SHLD2P1	12.1549	-1.73263	0.882282	-1.9638	0.0495531	0.782527
MAOB	2.56304	2.96782	1.51201	1.96283	0.0496656	0.78254
TMC5	8.31865	2.10692	1.0742	1.96138	0.0498345	0.78254
ZNF182	29.5428	1.82933	0.932195	1.96239	0.0497166	0.78254
CA11	168.405	0.562603	0.286631	1.96281	0.0496677	0.78254
SELENOP	1028.48	0.497567	0.253634	1.96175	0.049792	0.78254
CBX4	3600.37	0.240318	0.122536	1.9612	0.0498561	0.78254
ZSWIM5	187.745	-0.363684	0.18549	-1.96067	0.0499174	0.782711
NAV1	564.468	-0.39588	0.201983	-1.95997	0.049999	0.7832
MAK	25.9093	2.30341	1.17567	1.95924	0.0500847	0.783753
DNAJB4	109.198	-0.769197	0.392837	-1.95805	0.0502237	0.784768
CCDC144A	2.41505	-3.89841	1.99119	-1.95782	0.0502506	0.784768
ITPKC	448.014	0.340407	0.173965	1.95676	0.0503762	0.78594
ZNF525	81.2862	-0.620687	0.317415	-1.95544	0.0505308	0.787561
TRIP11	337.737	-0.614639	0.314825	-1.95232	0.0509001	0.792521
MBNL2	102.896	-0.881946	0.451903	-1.95163	0.0509823	0.793007
SKI	2997.45	0.327355	0.167895	1.94976	0.0512052	0.794089
AJUBA	695.071	-0.230001	0.117932	-1.95028	0.0511425	0.794089
WDR17	4.67687	-2.43557	1.24893	-1.95013	0.0511607	0.794089
NEK3	29.3797	0.69173	0.354862	1.94929	0.0512604	0.794153
CRISPLD1	5.70222	-1.63555	0.840899	-1.945	0.0517745	0.801318
HES1	80.7125	0.646408	0.332498	1.94409	0.0518841	0.802216
HS6ST2	44.1664	-0.777767	0.400265	-1.94313	0.0520003	0.802416
USP53	164.49	-0.82456	0.424294	-1.94337	0.0519713	0.802416
RALGAPA1P1	2.0691	-3.03382	1.56166	-1.9427	0.052053	0.802432
SIMC1	362.449	0.209849	0.108052	1.94211	0.0521232	0.802719
KIF20B	87.1434	-1.09466	0.563997	-1.94089	0.0522712	0.8042
ZNF34	13.1151	3.25508	1.67747	1.94046	0.0523232	0.804204
ARL6IP5	4914.37	-0.28779	0.148484	-1.93819	0.0526002	0.80607
USP36	942.844	-0.423921	0.218676	-1.93859	0.0525518	0.80607
TSTD3	101.835	-0.654155	0.337366	-1.93901	0.0525006	0.80607
VPS39	52.0978	0.66268	0.342138	1.93688	0.0527602	0.806988
OAT	3.17792	-2.4016	1.23995	-1.93685	0.052764	0.806988
CDK6	48.9323	1.41137	0.730137	1.93303	0.053233	0.81336
SH3TC1	276.063	0.346376	0.179328	1.93152	0.0534188	0.814346
HPS5	421.712	-0.339167	0.175622	-1.93123	0.0534547	0.814346
STXBP5	351.779	-0.559601	0.289647	-1.93201	0.0533582	0.814346
ELOVL2	17.2083	1.03984	0.539438	1.92764	0.0539001	0.816329
SLC39A10	507.438	0.606075	0.314218	1.92883	0.0537514	0.816329
MRNIP	338.431	-0.281338	0.145932	-1.92787	0.0538719	0.816329
UBE2Q2P1	5.25633	-1.873	0.971003	-1.92893	0.0537394	0.816329
OR8D1	1.47244	-3.78153	1.96033	-1.92903	0.0537275	0.816329
MAPT	2.73802	-3.88166	2.01331	-1.928	0.0538553	0.816329
VMP1	2294.93	0.217362	0.113104	1.92179	0.0546322	0.826611
AP002748.5	15.0026	7.4526	3.88355	1.91902	0.0549823	0.826792
HLA-B	2.80473	3.3377	1.73895	1.91937	0.0549375	0.826792
SLC25A13	27.6404	1.42825	0.744041	1.91958	0.0549105	0.826792
SAMD5	34.4635	1.35475	0.705627	1.91992	0.054868	0.826792
MSX1	278.745	0.308228	0.160676	1.91833	0.0550698	0.826792
MAP3K14	266.619	-0.410459	0.21393	-1.91866	0.055027	0.826792
FZD4	101.922	-0.579125	0.301665	-1.91977	0.0548876	0.826792
GRAMD1C	77.3409	-1.12209	0.584235	-1.92061	0.0547803	0.826792
AC018635.1	3.43951	-4.98177	2.59756	-1.91787	0.0551279	0.826866
CDKN1A	125.28	0.75536	0.394213	1.91612	0.0553496	0.828319
OSGEPL1	161.242	-0.422201	0.220315	-1.91635	0.0553206	0.828319
SLC22A18	4.06858	-4.73783	2.47297	-1.91585	0.0553847	0.828319
ARHGAP12	123.157	-1.27547	0.665926	-1.91533	0.05545	0.828497
SLC7A6	588.994	-0.331852	0.173381	-1.914	0.0556198	0.830236
AAK1	1391.61	0.506897	0.264974	1.913	0.0557478	0.83082
KCTD5	1613.8	0.242858	0.126988	1.91244	0.0558193	0.83082
TMEM41A	912.757	-0.192464	0.100627	-1.91264	0.0557936	0.83082
PLEKHA7	360.705	-0.31498	0.164744	-1.91194	0.0558839	0.830986
PCDHGB1	140.488	0.370813	0.1941	1.91042	0.0560791	0.831055
MLPH	1406.45	0.349446	0.182817	1.91145	0.0559471	0.831055
RBM33	803.21	0.310405	0.162496	1.91024	0.0561025	0.831055
SEMA6D	60.0959	-0.6938	0.363197	-1.91026	0.0561	0.831055
SPECC1L	2813.3	0.336927	0.176519	1.90873	0.0562969	0.83314
GLYATL1	1236.71	0.406395	0.213015	1.90783	0.0564137	0.833282
FZD3	281.976	-0.51045	0.267534	-1.90798	0.0563938	0.833282
GUSBP9	405.072	-0.434998	0.228139	-1.90673	0.0565559	0.83459
LRRC6	43.0269	-0.743775	0.390384	-1.90524	0.0567489	0.836643
ARMC9	156.773	0.453702	0.238211	1.90462	0.0568293	0.837034
RPL18P13	4.35799	-1.81807	0.954812	-1.90412	0.0568951	0.83721
OTX1	63.0485	0.482644	0.253705	1.90239	0.0571206	0.839032
ZCCHC8	35.9163	-1.2703	0.667759	-1.90234	0.057127	0.839032
NCOA3	427.119	-0.57448	0.302094	-1.90166	0.0572161	0.839548
FHOD3	178.075	-0.339529	0.178615	-1.9009	0.0573154	0.840211
ZSCAN30	414.605	-0.504516	0.265543	-1.89994	0.0574412	0.841262
NBPF19	781.463	0.576602	0.303699	1.8986	0.0576177	0.843052
TRIM45	165.562	-0.346707	0.182717	-1.8975	0.0577615	0.844361
SLC25A25	1001.42	0.23025	0.121452	1.89581	0.0579856	0.84684
KALRN	104.169	-0.602105	0.317775	-1.89475	0.0581255	0.848086
TMEM139	8.62695	1.08584	0.573732	1.8926	0.0584114	0.851458
SSPOP	33.3618	1.45841	0.770792	1.89209	0.0584787	0.851641
SAT1	1322.79	0.27387	0.144837	1.89088	0.0586398	0.8526
EGFL8	9.88094	-6.93061	3.66549	-1.89078	0.0586543	0.8526
ID2	160.411	0.437967	0.231911	1.88851	0.058957	0.856109
RELT	124.126	0.36039	0.190869	1.88815	0.0590059	0.856109
BRPF1	82.1062	1.08949	0.577335	1.8871	0.0591465	0.857207
DUSP16	178.467	-0.577844	0.306406	-1.88588	0.0593116	0.857207
ZNF658	138.109	-0.741232	0.393115	-1.88554	0.0593574	0.857207
RELCH	915.569	-0.782839	0.414931	-1.88667	0.0592044	0.857207
PPIP5K2	73.9376	-1.11637	0.591977	-1.88583	0.0593185	0.857207
ATP1A2	2.43056	3.83396	2.03581	1.88326	0.0596649	0.857297
TRGC2	2.32535	3.08672	1.64036	1.88173	0.0598724	0.857297
PRDM16	4.00946	2.10813	1.12005	1.88217	0.0598127	0.857297
RNASEH2C	475.135	0.591133	0.314151	1.88168	0.059879	0.857297
FAM104A	868.913	0.240957	0.127881	1.88422	0.0595349	0.857297
APLP2	10708.8	0.174426	0.0927697	1.8802	0.0600808	0.857297
GALNT10	2164.4	-0.196396	0.104203	-1.88474	0.0594643	0.857297
CASZ1	976.105	-0.315403	0.167673	-1.88106	0.0599631	0.857297
MORC3	303.947	-0.848747	0.451361	-1.88042	0.0600515	0.857297
ANKS1B	31.0679	-0.991855	0.526479	-1.88394	0.0595731	0.857297
MAB21L4	6.06701	-1.42615	0.757268	-1.88328	0.0596624	0.857297
SP110	17.2019	-1.71217	0.90974	-1.88204	0.0598303	0.857297
AL138878.2	3.08959	-1.85621	0.987167	-1.88034	0.0600617	0.857297
CSPG4P10	86.2794	0.826395	0.439758	1.87921	0.0602165	0.858444
AL669918.1	243.413	0.414562	0.220667	1.87867	0.0602891	0.858691
ANKRD13D	42.7249	-0.616782	0.328422	-1.87801	0.0603791	0.859186
POLQ	148.347	-0.799118	0.425605	-1.87761	0.0604351	0.859195
DOCK7	1313.97	-0.705638	0.376105	-1.87617	0.0606317	0.861202
WDR78	14.5026	1.33941	0.714782	1.87388	0.0609474	0.862863
GEMIN7	159.954	0.474023	0.253041	1.87331	0.0610262	0.862863
ZNF682	81.8472	-0.533886	0.284892	-1.87399	0.0609314	0.862863
YME1L1	218.941	-0.617864	0.329759	-1.87369	0.0609738	0.862863
SH3GL1P1	7.73698	-1.52613	0.8146	-1.87347	0.0610036	0.862863
EFCAB10	1.13397	-3.51869	1.8793	-1.87235	0.0611587	0.86395
AC074141.1	7.4164	-1.65741	0.885903	-1.87087	0.0613636	0.866058
TNFAIP8L1	92.798	0.413273	0.221086	1.86929	0.0615828	0.868362
MSRB3	27.3096	1.16715	0.62526	1.86666	0.0619493	0.870371
FRK	133.889	0.860468	0.460889	1.86697	0.0619051	0.870371
SIPA1L2	599.187	0.504201	0.269985	1.86751	0.0618297	0.870371
MMP14	2.08269	-3.59704	1.92667	-1.86697	0.0619062	0.870371
RERE	707.186	-0.356698	0.191173	-1.86584	0.0620637	0.87119
FFAR2	20.1886	-1.10012	0.589913	-1.86489	0.0621966	0.872268
EPHB6	15.803	1.63648	0.878158	1.86354	0.0623868	0.874146
ADAMTS12	1.72141	3.13208	1.6832	1.86079	0.0627743	0.877051
TMEM108	7.49913	1.53173	0.823338	1.86039	0.0628302	0.877051
THYN1	742.869	0.191688	0.103076	1.85967	0.0629328	0.877051
CWC15	998.938	-0.237601	0.127706	-1.86052	0.0628117	0.877051
H2BC18	107.907	-0.445953	0.239721	-1.8603	0.0628426	0.877051
ZNF624	35.2636	-1.24333	0.668502	-1.85988	0.0629023	0.877051
AHNAK	3366.87	0.393467	0.211758	1.8581	0.0631553	0.878691
GNRHR2	50.5206	-0.55033	0.296201	-1.85796	0.0631748	0.878691
ZNF816	16.0513	-1.56226	0.840989	-1.85764	0.06322	0.878691
ARSG	301.414	0.337805	0.182041	1.85565	0.0635033	0.881311
SLC35G1	150.948	-0.409389	0.22068	-1.85512	0.0635787	0.881311
LCOR	229.757	-0.800165	0.431312	-1.85519	0.0635695	0.881311
ZP1	10.7388	1.23874	0.668323	1.85351	0.0638098	0.883726
GHRHR	1.56114	3.28682	1.77622	1.85045	0.0642486	0.88421
C19orf73	42.4875	0.804936	0.435212	1.84953	0.064382	0.88421
GOSR2	672.157	0.294593	0.159351	1.8487	0.0645005	0.88421
INHBB	281.014	-0.302625	0.163527	-1.85061	0.0642254	0.88421
SH2D4A	582.289	-0.336483	0.181815	-1.85069	0.0642143	0.88421
MANBA	82.3821	-0.392049	0.212078	-1.84861	0.0645141	0.88421
RABL3	259.481	-0.504653	0.272423	-1.85246	0.0639597	0.88421
FAM241A	205.934	-0.549335	0.296815	-1.85077	0.064203	0.88421
AC005520.1	25.8308	-1.06705	0.577034	-1.84919	0.0644298	0.88421
KRTAP5-2	9.58964	-1.28587	0.694619	-1.85119	0.0641427	0.88421
BRD3	35.86	-1.36433	0.73807	-1.84852	0.0645276	0.88421
SLC4A5	7.65162	-2.00883	1.0864	-1.84907	0.0644475	0.88421
ARL2BP	1373.67	0.258383	0.139812	1.84808	0.0645911	0.8843
AC009070.1	16.0598	1.15682	0.626266	1.84718	0.0647215	0.884527
DLX2	28.2968	0.726858	0.393471	1.8473	0.0647043	0.884527
SPIN2A	3.78945	-2.30303	1.24791	-1.84551	0.0649639	0.88706
DIPK2A	73.3199	1.59762	0.866172	1.84446	0.0651161	0.888357
ZNRD2	206.789	0.51548	0.279559	1.8439	0.0651971	0.888682
KRT8P3	2.53757	2.66186	1.44421	1.84312	0.0653111	0.889455
SYNJ2BP	962.813	-0.186063	0.101047	-1.84134	0.0655711	0.889877
DIS3L	1142.47	-0.196424	0.106656	-1.84166	0.0655251	0.889877
JDP2	181.886	-0.338553	0.183822	-1.84175	0.0655118	0.889877
BTN2A2	237.741	-0.449141	0.243868	-1.84174	0.0655136	0.889877
CHMP4C	301.377	-0.4496	0.244324	-1.84018	0.0657414	0.89141
NATD1	235.419	-0.327466	0.178078	-1.83889	0.0659315	0.893208
TNFRSF1A	68.8514	0.999835	0.544122	1.83752	0.0661331	0.893602
DLL3	74.4557	0.521795	0.283937	1.83771	0.0661048	0.893602
HESX1	4.45246	-1.94849	1.06001	-1.83818	0.0660364	0.893602
SMIM10L2A	289.035	0.279629	0.152248	1.83667	0.0662588	0.893843
PKP4	453.293	-0.441517	0.240397	-1.83662	0.066266	0.893843
PPP1R32	7.67922	1.09583	0.597029	1.83548	0.0664353	0.894954
CDKAL1	167.473	-0.305128	0.166256	-1.83528	0.0664636	0.894954
MTND4P20	10.6183	-1.53084	0.83437	-1.83473	0.0665458	0.895286
SPDYE10P	9.98143	2.4261	1.32336	1.83329	0.0667597	0.896359
RAB2B	466.109	0.276733	0.150967	1.83307	0.0667924	0.896359
VPS8	610.14	-0.414861	0.226326	-1.83303	0.0667986	0.896359
LRRC4C	22.0466	-0.899983	0.491234	-1.83209	0.0669387	0.897464
KCNG3	32.5942	1.13524	0.620363	1.82997	0.0672551	0.900094
FAXDC2	147.173	0.407475	0.222712	1.82961	0.0673087	0.900094
RAP1B	1392.52	-0.336667	0.18401	-1.82961	0.0673082	0.900094
CCN1	176.384	0.26766	0.146335	1.82909	0.067386	0.900353
PGBD4P8	1.39311	3.50902	1.91894	1.82862	0.0674565	0.900521
AP5M1	497.196	-0.592739	0.324401	-1.82718	0.067673	0.902636
PPIB	19.5198	0.968303	0.530143	1.82649	0.0677761	0.903235
PPP1R26	819.498	0.219303	0.120161	1.82508	0.0679895	0.905303
GCNT1	819.541	0.414064	0.227119	1.82311	0.0682864	0.908478
DDX18	941.197	-0.515359	0.283271	-1.81931	0.0688636	0.913048
LACC1	25.041	-0.96946	0.532874	-1.8193	0.0688649	0.913048
ZNF674	43.2407	-1.023	0.562138	-1.81984	0.0687831	0.913048
AL136295.3	1.14508	-3.98066	2.18693	-1.8202	0.0687279	0.913048
AKR1C2	13.4088	0.925593	0.509069	1.81821	0.0690321	0.913596
PYCR1	5297.39	0.349173	0.19228	1.81596	0.0693766	0.913596
SIAH2	853.902	0.329375	0.181348	1.81626	0.0693298	0.913596
TEAD3	445.186	0.268495	0.147766	1.81703	0.069212	0.913596
PURA	199.591	-0.354507	0.195144	-1.81664	0.0692717	0.913596
CBR4	311.665	-0.48532	0.267247	-1.816	0.0693703	0.913596
LRP5L	49.3844	-0.646928	0.355934	-1.81755	0.069133	0.913596
GRIP1	13.9921	-2.30056	1.26528	-1.81822	0.0690302	0.913596
MCTP1	71.7849	-0.74989	0.41315	-1.81505	0.0695155	0.91465
AL139156.2	1.44992	3.12928	1.72546	1.81359	0.0697409	0.91529
ZNF780A	316.706	-0.554632	0.305709	-1.81425	0.0696392	0.91529
MAPKAPK2	51.0649	-0.735937	0.405718	-1.81391	0.0696916	0.91529
MAML2	15.0703	1.37635	0.760346	1.81016	0.0702709	0.918705
AGAP10P	12.6336	1.36179	0.751998	1.8109	0.0701562	0.918705
AC138776.1	59.1002	-0.579389	0.319973	-1.81074	0.0701809	0.918705
STK38L	339.833	-0.606118	0.334684	-1.81102	0.0701384	0.918705
AC211486.3	3.42353	-4.9451	2.73211	-1.80999	0.0702967	0.918705
TBC1D22B	350.798	0.228033	0.126016	1.80955	0.0703651	0.918826
CCDC103	32.0085	0.718376	0.397569	1.80692	0.0707741	0.921372
FLVCR1	665.018	-0.253087	0.140092	-1.80657	0.0708295	0.921372
ITSN2	367.26	-0.555195	0.30735	-1.8064	0.0708565	0.921372
MAP3K8	65.3568	-0.573576	0.317486	-1.80662	0.0708218	0.921372
TXK	1.72791	-2.92912	1.62108	-1.8069	0.0707777	0.921372
ATOH8	1.52442	2.9928	1.65777	1.80532	0.0710249	0.922119
SEC22C	1722.74	0.218488	0.121035	1.80517	0.0710485	0.922119
LIPH	44.819	-0.69382	0.384411	-1.80489	0.071092	0.922119
FAM86FP	15.1971	-0.833169	0.462124	-1.80291	0.0714023	0.924601
ASAH2	67.8167	-1.19462	0.662565	-1.80303	0.0713837	0.924601
INAVA	17.2877	1.14291	0.634897	1.80015	0.071837	0.924953
TM4SF1	230.796	0.539822	0.299557	1.80207	0.0715349	0.924953
ACAA1	2255.7	0.271126	0.150618	1.80009	0.0718462	0.924953
GULP1	3468.06	-0.23671	0.131428	-1.80106	0.0716929	0.924953
EPHA2	99.5061	-0.379464	0.210735	-1.80067	0.0717552	0.924953
HNRNPA1P73	3.82403	-1.70184	0.945033	-1.80083	0.0717301	0.924953
GAB3	4.23057	-2.55696	1.41924	-1.80164	0.0716016	0.924953
UBALD2	593.871	0.400711	0.222711	1.79924	0.0719806	0.925916
CHURC1-FNTB	25.0679	1.69387	0.941831	1.79848	0.0721007	0.926694
ARG2	2206.79	0.243722	0.135678	1.79632	0.0724435	0.928795
CBWD2	253.259	-0.425755	0.236976	-1.79662	0.0723962	0.928795
IFRD1	264.271	-0.751155	0.418127	-1.79647	0.0724191	0.928795
INPP5B	351.279	-0.221265	0.12331	-1.79438	0.0727523	0.930825
MSI2	1283.1	-0.238962	0.133142	-1.7948	0.0726861	0.930825
TAF1D	544.382	-0.535522	0.298599	-1.79345	0.0729013	0.930825
LNX2	536.864	-0.596665	0.332621	-1.79383	0.0728403	0.930825
KIFC3	7.96928	-1.51524	0.844846	-1.79351	0.0728913	0.930825
STRADB	1222.76	-0.190783	0.106413	-1.79285	0.072997	0.931281
PEBP4	52.4686	0.70861	0.395447	1.79192	0.0731455	0.932367
OTUD7B	1280.82	0.314051	0.175294	1.79157	0.0732021	0.932367
AC084824.1	3.07106	-2.64467	1.47667	-1.79097	0.0732976	0.932819
RAB3IP	287.6	0.555393	0.310366	1.78948	0.0735383	0.93503
TMEM120B	579.998	0.309794	0.173152	1.78914	0.0735918	0.93503
FANCE	1.9059	4.69167	2.62325	1.7885	0.0736961	0.935591
FKBP10	234.513	-0.50384	0.281861	-1.78755	0.0738486	0.935998
CCNE2	71.5995	-0.788509	0.441095	-1.78762	0.0738377	0.935998
ZFP36	221.038	0.450928	0.252508	1.7858	0.0741317	0.936018
MAFG	748.811	0.162556	0.0909603	1.78711	0.0739201	0.936018
TMEM69	979.244	-0.193418	0.108249	-1.78679	0.0739713	0.936018
C12orf49	1300.85	-0.206003	0.115364	-1.78568	0.0741514	0.936018
PITX1	1406.31	-0.39518	0.221241	-1.78619	0.0740683	0.936018
MED30	75.0966	0.360609	0.202117	1.78416	0.0743981	0.93837
CCDC74B	6.44564	1.89307	1.06229	1.78205	0.0747404	0.94116
LRRC31	10.8284	-2.27119	1.27437	-1.78221	0.0747145	0.94116
SDF2L1	726.3	0.386162	0.21704	1.77922	0.0752036	0.946226
PRKCD	1755.03	0.261652	0.147092	1.77884	0.0752666	0.946253
RASSF1	536.13	0.187213	0.105279	1.77825	0.0753627	0.946694
CSPG4P12	98.5469	0.478684	0.26942	1.77672	0.0756141	0.947755
ATG4C	189.02	-0.556833	0.313422	-1.77662	0.0756301	0.947755
SPHK1	23.5251	-1.27457	0.717322	-1.77684	0.0755948	0.947755
CES3	80.7041	0.599992	0.338032	1.77496	0.0759053	0.949672
NPB	3.89214	-2.20736	1.24358	-1.775	0.0758975	0.949672
AL139011.2	12.9528	1.4896	0.839924	1.7735	0.076146	0.949971
VIPR2	14.9999	1.01134	0.570339	1.77322	0.0761928	0.949971
OVOL2	315.433	0.298992	0.168648	1.77288	0.0762483	0.949971
DENND5A	1332.15	0.270766	0.152741	1.77272	0.0762751	0.949971
WASHC1	199.612	-0.372037	0.209746	-1.77375	0.0761039	0.949971
GAPDHS	6.5459	-1.25035	0.705527	-1.77223	0.0763572	0.949971
HOOK1	1.39882	-3.95889	2.23344	-1.77255	0.0763027	0.949971
PRMT9	367.198	-0.650073	0.366919	-1.77171	0.0764433	0.950281
KRT6C	19.7568	0.955659	0.539629	1.77096	0.0765682	0.951073
AKAP1	1917.39	0.222967	0.126017	1.76934	0.0768379	0.953081
TRIP4	11.0633	-1.40542	0.794361	-1.76925	0.0768525	0.953081
PYGB	6250.84	0.390137	0.220669	1.76798	0.0770646	0.953312
LSM1	434.55	-0.226343	0.128074	-1.76729	0.07718	0.953312
HSBP1L1	451.289	-0.258562	0.146333	-1.76693	0.0772392	0.953312
PBX3	181.386	-0.302684	0.171296	-1.76702	0.0772247	0.953312
METTL15	181.521	-0.700139	0.396163	-1.7673	0.0771781	0.953312
PCBP3	51.2292	-0.759386	0.429732	-1.76711	0.077209	0.953312
WNT4	41.3045	-0.544092	0.308157	-1.76563	0.0774572	0.95517
MLLT3	91.3847	-0.574681	0.325542	-1.7653	0.0775127	0.95517
C2CD3	861.42	0.270442	0.153263	1.76456	0.077638	0.955956
STX3	1467.49	-0.231285	0.131138	-1.76368	0.077786	0.956263
DCBLD2	129.294	-0.445932	0.252819	-1.76384	0.0777583	0.956263
IRF9	19.0983	-1.17241	0.664928	-1.76321	0.0778655	0.956483
ENTPD4	1065.39	0.198462	0.112691	1.76112	0.0782177	0.958538
ARNT	1454.07	-0.15721	0.0892588	-1.76128	0.0781904	0.958538
TSPAN5	165.286	-0.41456	0.235351	-1.76145	0.0781615	0.958538
PLXDC2	482.566	-0.28717	0.163128	-1.7604	0.07834	0.95928
SPCS3	1197.16	0.238648	0.135711	1.7585	0.0786625	0.959448
APC	349.962	-0.853358	0.484887	-1.75991	0.0784229	0.959448
COL7A1	20.0635	-1.10297	0.627051	-1.75898	0.0785816	0.959448
ATP8B4	3.77162	-2.05403	1.16746	-1.7594	0.0785103	0.959448
DND1	2.13733	-2.76816	1.57394	-1.75874	0.0786209	0.959448
RNF6	703.353	-0.618236	0.351689	-1.75791	0.0787634	0.959461
ST8SIA6	1.2118	-3.70491	2.10773	-1.75777	0.0787871	0.959461
LHX2	119.07	-0.459228	0.261379	-1.75694	0.0789276	0.96042
CYP1A1	3.70104	1.95596	1.11395	1.75588	0.0791086	0.961016
CNIH3	45.3397	0.591931	0.337379	1.7545	0.0793454	0.961016
PTPN21	287.934	0.431758	0.245946	1.7555	0.0791739	0.961016
PELO	1160.07	0.164483	0.0937481	1.75452	0.0793417	0.961016
TMTC3	263.809	-0.877603	0.500206	-1.75448	0.0793476	0.961016
CEP350	282.462	-0.893025	0.50893	-1.75471	0.0793089	0.961016
ATG3	61.5823	-0.923538	0.52655	-1.75394	0.0794407	0.961393
EEF2K	16.4784	1.03132	0.58852	1.75239	0.0797068	0.962063
TADA2A	185.58	0.696005	0.397513	1.7509	0.0799633	0.962063
ITPRIP	211.855	0.230901	0.131878	1.75086	0.0799697	0.962063
PIP5K1A	2095.21	0.16606	0.0948512	1.75074	0.0799913	0.962063
MIPOL1	290.534	-0.57933	0.330627	-1.75222	0.0797363	0.962063
TDRD3	250.078	-0.595764	0.34006	-1.75194	0.079784	0.962063
UBA6	557.332	-0.78081	0.44575	-1.75168	0.0798297	0.962063
GLIPR1	4.67757	-1.7637	1.00691	-1.75159	0.0798435	0.962063
SMARCE1	3527.8	-0.179892	0.102789	-1.75011	0.0800985	0.962607
SCYL3	177.712	-0.435976	0.249215	-1.7494	0.0802227	0.962611
KRT80	42.5468	-0.667401	0.381433	-1.74972	0.080166	0.962611
DDC	2679.73	-0.20581	0.117681	-1.74888	0.0803115	0.962933
SI	54.8689	-1.29018	0.738104	-1.74796	0.080471	0.964101
SLC22A10	36.2288	-0.82667	0.473249	-1.7468	0.0806723	0.965657
PLCB2	6.43885	-2.66099	1.52362	-1.74649	0.0807252	0.965657
SIN3B	1530.41	0.19154	0.109736	1.74547	0.0809032	0.966637
TMEM126B	172.82	-0.544778	0.312139	-1.74531	0.0809316	0.966637
ZNF611	86.5613	0.591844	0.339507	1.74324	0.0812909	0.967212
MSTO2P	64.7588	0.458987	0.263184	1.74398	0.0811632	0.967212
MT-ATP8	5735.48	0.387315	0.222075	1.74407	0.0811464	0.967212
BICDL1	346.67	-0.326188	0.1871	-1.74339	0.0812663	0.967212
NUP54	726.645	-0.452049	0.259251	-1.74367	0.0812161	0.967212
CDR2L	838.128	-0.313798	0.180114	-1.74221	0.081471	0.968613
CIAO1	591.293	-0.239618	0.137689	-1.74029	0.0818087	0.96966
GTF2IP1	870.12	-0.304376	0.174794	-1.74134	0.0816233	0.96966
AC138866.1	102.774	-0.561868	0.322818	-1.74051	0.0817693	0.96966
DMBX1	18.9206	-2.56813	1.47516	-1.74092	0.0816974	0.96966
LRFN4	727.058	0.394483	0.227078	1.73721	0.0823496	0.971375
PRXL2C	168.146	0.380195	0.218813	1.73753	0.0822936	0.971375
TCTN1	949.071	0.149005	0.0856889	1.73891	0.0820503	0.971375
CCNH	779.558	-0.393491	0.226538	-1.73698	0.0823909	0.971375
ZIC5	61.0901	-0.560357	0.322353	-1.73833	0.0821519	0.971375
ERMARD	225.302	-0.59603	0.343003	-1.73768	0.0822669	0.971375
LCA5L	40.8124	-0.764452	0.439935	-1.73765	0.0822727	0.971375
WDR26	2363.55	-0.303699	0.175007	-1.73535	0.0826787	0.971819
LSP1P4	60.2867	-0.759161	0.437373	-1.73573	0.082612	0.971819
RAB27B	119.327	-1.0615	0.611561	-1.73572	0.0826137	0.971819
GFAP	5.97639	-2.91468	1.67934	-1.73561	0.0826322	0.971819
BCAS4	152.11	0.413267	0.238242	1.73465	0.0828023	0.972536
PDCD2	1420.39	-0.123796	0.0713962	-1.73392	0.0829317	0.97332
PTGR1	675.142	0.158283	0.0913439	1.73283	0.0831262	0.974446
CHN2	2.96725	-2.30203	1.3286	-1.73268	0.0831531	0.974446
RASD1	108.433	0.552039	0.318853	1.73133	0.0833927	0.976518
APBB2	645.981	0.298367	0.172494	1.72973	0.083679	0.976665
SMG8	954.75	0.156479	0.0904766	1.7295	0.0837195	0.976665
CYREN	1794.59	-0.186071	0.107526	-1.73047	0.0835462	0.976665
RNFT1	163.332	-0.408947	0.236397	-1.72992	0.0836445	0.976665
SIDT1	1.67458	-3.07864	1.7796	-1.72996	0.0836374	0.976665
BABAM2	604.332	0.405921	0.234781	1.72894	0.0838205	0.977109
PIM3	1077.28	0.308357	0.178395	1.7285	0.083898	0.97728
ZFP41	232.837	0.420066	0.243279	1.72668	0.0842249	0.977796
SEH1L	1360.49	-0.345117	0.199919	-1.72629	0.0842955	0.977796
ANKRD13A	246.304	-0.4745	0.274889	-1.72615	0.0843199	0.977796
ZNF85	17.8501	-1.18129	0.683687	-1.72782	0.0840204	0.977796
RNASET2	53.1803	-1.7612	1.02023	-1.72629	0.0842956	0.977796
HMGB1P14	2.63048	-1.88778	1.09362	-1.72618	0.0843159	0.977796
ATP8B2	12.4209	0.972495	0.563759	1.72502	0.084524	0.977974
PRSS27	26.2272	0.679466	0.393836	1.72525	0.0844824	0.977974
AC009779.3	25.0405	-0.792346	0.459187	-1.72554	0.0844296	0.977974
AL050331.1	4.94233	2.67087	1.55062	1.72245	0.0849877	0.978965
LBH	7.7478	1.3823	0.801907	1.72377	0.0847499	0.978965
B3GNT4	55.9067	0.775374	0.449947	1.72325	0.0848426	0.978965
ZNF622	1052.76	0.31618	0.183535	1.72272	0.0849383	0.978965
ZSWIM6	162.409	-0.491948	0.285561	-1.72274	0.0849348	0.978965
GNAI1	223.202	-0.678513	0.393858	-1.72274	0.084936	0.978965
RNF212	2.72548	3.3305	1.93837	1.7182	0.0857599	0.981668
PRSS21	1.44796	3.2703	1.90441	1.71722	0.0859385	0.981668
AP000812.5	36.4893	1.38119	0.803661	1.71863	0.0856824	0.981668
HEPH	7.11136	1.37851	0.801584	1.71973	0.085482	0.981668
FRS3	112.915	0.347493	0.202418	1.71671	0.0860314	0.981668
C11orf71	1601.62	-0.174602	0.101734	-1.71626	0.0861153	0.981668
PRKD3	163.736	-0.518845	0.302027	-1.71787	0.0858197	0.981668
SOCS6	270.072	-0.528523	0.307979	-1.7161	0.086144	0.981668
COL9A3	38.0534	-0.531941	0.309918	-1.71639	0.0860901	0.981668
FGFR1OP2	107.253	-0.534449	0.310969	-1.71866	0.085677	0.981668
RNF125	80.5681	-0.60372	0.351827	-1.71596	0.0861699	0.981668
TBC1D23	249.445	-0.61423	0.357432	-1.71845	0.0857142	0.981668
MARCHF1	43.5879	-1.00842	0.586949	-1.71806	0.085785	0.981668
EML6	5.57435	-2.30844	1.34245	-1.71957	0.0855112	0.981668
PKD1L2	1.93347	-3.09481	1.79907	-1.72022	0.0853918	0.981668
CC2D2B	4.64535	1.68523	0.983209	1.71401	0.0865262	0.984283
ZSCAN31	153.685	-0.341279	0.199093	-1.71417	0.0864981	0.984283
AC093270.2	1.10325	3.53055	2.06276	1.71157	0.0869766	0.984445
BBS4	730.188	0.325003	0.189775	1.71257	0.086791	0.984445
PIGG	1423.65	0.128242	0.0748655	1.71297	0.0867185	0.984445
CENPP	176.808	-0.423483	0.247323	-1.71227	0.0868476	0.984445
NIFK	710.369	-0.463657	0.270879	-1.71167	0.0869567	0.984445
ZNF736	286.167	-0.769313	0.449489	-1.71153	0.0869839	0.984445
CCDC28A-AS1	20.8705	-0.911479	0.531951	-1.71347	0.0866269	0.984445
KIF5B	2802.88	-0.767369	0.448731	-1.71009	0.0872497	0.986735
AC026403.1	5.66107	1.66869	0.977921	1.70637	0.0879391	0.988289
FAM189A1	18.2501	1.37419	0.805117	1.70682	0.0878548	0.988289
RNF166	36.1185	0.836794	0.489854	1.70825	0.08759	0.988289
SIM2	108.567	0.418234	0.244741	1.70888	0.0874728	0.988289
DNAH5	137.024	0.365527	0.214198	1.70649	0.0879172	0.988289
ZBTB45P1	101.029	-0.411523	0.241028	-1.70737	0.0877542	0.988289
PDIK1L	112.997	-0.657128	0.384596	-1.70862	0.0875214	0.988289
AC139495.2	13.1335	-0.811976	0.47588	-1.70626	0.0879596	0.988289
DSEL	1218.34	-0.924292	0.541333	-1.70744	0.087741	0.988289
SLAIN1	511.427	0.286847	0.1682	1.7054	0.08812	0.989377
XPNPEP1	2074.38	0.144773	0.0849291	1.70463	0.088263	0.990266
VWA2	85.5937	-0.585916	0.344279	-1.70186	0.0887811	0.995361
FAM222A	2.71606	5.99602	4.25447	1.40935	0.158733	0.996412
AC005832.4	2.58825	5.926	4.25484	1.39277	0.16369	0.996412
MITF	17.5189	5.33591	3.23968	1.64705	0.0995476	0.996412
SCARF1	2.60394	5.24936	4.25957	1.23237	0.217812	0.996412
BIVM-ERCC5	8.09668	5.19764	4.25987	1.22014	0.222412	0.996412
TSPY7P	1.33587	4.97169	4.26212	1.16648	0.243419	0.996412
GAGE12J	1.33587	4.97169	4.26212	1.16648	0.243419	0.996412
PXDC1	5.11485	4.80355	3.16919	1.5157	0.129594	0.996412
CCNJL	6.74281	4.4357	2.65675	1.6696	0.094999	0.996412
SERPINH1	1.95111	4.21379	2.64596	1.59254	0.111264	0.996412
PCDHB11	1.09095	4.15723	4.27362	0.972765	0.33067	0.996412
AC097637.1	1.9596	4.05741	2.91728	1.39082	0.16428	0.996412
GATA6	3.01641	3.80841	4.28097	0.889615	0.373673	0.996412
PRAMEF36P	1.22198	3.42837	4.01372	0.854163	0.393014	0.996412
SLC16A11	1.60149	3.35248	2.0129	1.6655	0.0958127	0.996412
GMNC	1.83546	3.33468	2.40455	1.38682	0.165495	0.996412
DPY19L1	17.93	3.3093	4.13875	0.79959	0.423948	0.996412
PRY	1.62034	3.28613	2.81759	1.16629	0.243497	0.996412
MEFV	1.90371	3.27902	2.28634	1.43418	0.151521	0.996412
AC109992.1	2.27217	3.27324	3.23765	1.01099	0.31202	0.996412
ARHGAP19-SLIT1	0.989124	3.2482	2.39936	1.35378	0.175807	0.996412
IL17C	1.07737	3.20319	3.25806	0.983159	0.325529	0.996412
PSORS1C1	2.69855	3.15251	2.21238	1.42494	0.154174	0.996412
DNASE1L3	1.52201	3.09931	2.91704	1.06248	0.288016	0.996412
RFX4	1.01803	3.00731	2.08495	1.44239	0.149193	0.996412
GIPC3	4.56708	2.99461	2.19962	1.36142	0.173381	0.996412
AC069368.1	1.16462	2.98746	2.91361	1.02535	0.305199	0.996412
AC024451.2	1.07327	2.98138	1.81582	1.6419	0.100611	0.996412
AC118282.1	1.90199	2.97872	3.23145	0.921791	0.356638	0.996412
SNX18P24	1.13936	2.97448	2.07484	1.4336	0.151687	0.996412
RPL10P6	1.2143	2.96038	1.92964	1.53416	0.12499	0.996412
CCDC160	1.58677	2.95755	1.77976	1.66177	0.0965588	0.996412
COL2A1	2.32583	2.86157	2.09724	1.36444	0.172428	0.996412
CDH18	1.16953	2.85655	2.54236	1.12358	0.26119	0.996412
GUSBP5	1.689	2.8315	1.68251	1.6829	0.0923936	0.996412
GAPDHP65	1.35881	2.80021	1.75808	1.59277	0.111212	0.996412
AL136295.1	31.9257	2.79911	3.7644	0.743576	0.457133	0.996412
ATP10D	1.37054	2.78146	2.79695	0.994461	0.319998	0.996412
PNPLA3	2.25146	2.77804	2.81569	0.986632	0.323823	0.996412
RCSD1	1.3937	2.76317	1.92191	1.43772	0.150513	0.996412
ST13P5	1.23833	2.75985	1.80701	1.5273	0.126686	0.996412
ZBTB22	37.8742	2.74813	2.99511	0.91754	0.35886	0.996412
GALNT15	3.19865	2.74174	2.38173	1.15116	0.249668	0.996412
SLC25A21	2.87116	2.70628	2.56139	1.05657	0.290709	0.996412
RASL10A	1.70121	2.67707	1.57701	1.69756	0.0895903	0.996412
KC877373.1	1.89871	2.67586	1.64888	1.62283	0.104625	0.996412
TBX4	0.979766	2.6367	2.42449	1.08753	0.276805	0.996412
ALAS2	1.38901	2.62883	1.68195	1.56297	0.118061	0.996412
CHST6	1.49982	2.62812	2.23191	1.17752	0.238987	0.996412
FCRLA	1.27622	2.58854	2.13543	1.21219	0.225441	0.996412
AP000350.4	2.06552	2.58185	2.71096	0.952376	0.340906	0.996412
VWFP1	2.36408	2.57787	1.62585	1.58555	0.11284	0.996412
YBX1P2	1.14687	2.57033	2.03607	1.2624	0.206806	0.996412
FGF21	1.32357	2.55507	2.08558	1.22511	0.220532	0.996412
AL137784.1	2.31456	2.55443	1.94269	1.3149	0.188544	0.996412
CRIPT	5.393	2.54676	4.11882	0.618322	0.536363	0.996412
TMSB4XP4	1.17637	2.53581	2.42038	1.04769	0.29478	0.996412
CATSPERE	1.32817	2.53123	1.90407	1.32938	0.183723	0.996412
FAR2P1	6.73715	2.50386	1.57343	1.59134	0.111532	0.996412
NKPD1	1.22167	2.47694	4.3309	0.571922	0.567375	0.996412
EGFLAM	1.00658	2.46004	2.07456	1.18581	0.235696	0.996412
RAG1	1.33257	2.44162	1.97698	1.23503	0.216821	0.996412
AL021546.1	2.88903	2.43224	1.98471	1.22549	0.220392	0.996412
MGAT4EP	1.48102	2.42449	2.10437	1.15212	0.249271	0.996412
GGT3P	1.54224	2.41946	2.57124	0.940969	0.346721	0.996412
YBX1P10	2.51991	2.41716	1.53684	1.57281	0.115762	0.996412
BUD13P1	3.4833	2.39745	1.43868	1.66642	0.0956291	0.996412
AC011499.1	1.29073	2.39672	2.20161	1.08862	0.27632	0.996412
AL807752.6	1.14033	2.36904	2.156	1.09881	0.27185	0.996412
AC037459.1	1.26751	2.36506	2.64024	0.895773	0.370374	0.996412
AC104532.1	1.89277	2.35299	1.85185	1.27061	0.203866	0.996412
AC093899.2	2.12243	2.33587	2.40266	0.9722	0.330951	0.996412
SMG1P4	3.82789	2.3302	2.23892	1.04077	0.297984	0.996412
PHF24	1.20865	2.3195	1.8455	1.25684	0.208811	0.996412
UGT1A10	1.71333	2.31824	2.55644	0.906825	0.364499	0.996412
RPL13AP3	1.00896	2.31375	2.5759	0.89823	0.369063	0.996412
OR56A3	1.10342	2.31235	1.87083	1.236	0.216458	0.996412
EIF4HP1	1.28761	2.31092	1.68385	1.3724	0.169939	0.996412
RPS23P8	1.25432	2.30241	1.81613	1.26775	0.204886	0.996412
CSF1R	1.50085	2.30184	1.95168	1.17941	0.238234	0.996412
RFPL4AP6	0.988449	2.29824	1.97112	1.16595	0.243633	0.996412
FUT2	2.51385	2.29818	1.82694	1.25794	0.208415	0.996412
AZGP1P2	1.0384	2.29434	2.17492	1.05491	0.291468	0.996412
AL359736.1	1.05984	2.27114	4.297	0.528541	0.597124	0.996412
NTNG2	2.79313	2.26815	1.80626	1.25572	0.209218	0.996412
WNT11	1.219	2.26177	2.29709	0.984622	0.32481	0.996412
OSCAR	2.7951	2.25461	2.0301	1.11059	0.266746	0.996412
CAPN11	1.25826	2.25213	1.89987	1.18541	0.235854	0.996412
NUTF2P2	1.81172	2.23327	1.61178	1.3856	0.165871	0.996412
FNDC8	1.68508	2.23153	1.47951	1.50828	0.131482	0.996412
MYH16	1.1951	2.22567	1.90864	1.16611	0.243572	0.996412
SFTA2	1.34535	2.21554	1.58909	1.39422	0.163251	0.996412
MYDGF	1.56144	2.20798	2.10568	1.04858	0.294369	0.996412
MYO1A	2.45799	2.19848	1.99065	1.10441	0.269417	0.996412
AL031681.3	2.67144	2.19236	2.04106	1.07413	0.282765	0.996412
AC099336.2	2.19459	2.18398	1.93838	1.1267	0.259868	0.996412
GLI2	1.17271	2.18109	2.17628	1.00221	0.316241	0.996412
KLF12	2.82905	2.17494	1.36667	1.59142	0.111516	0.996412
SLC45A1	27.9171	2.15975	1.45316	1.48625	0.137213	0.996412
RB1	2.87848	2.11775	2.19164	0.966284	0.333902	0.996412
ZNF212	0.981932	2.09758	2.17221	0.965641	0.334224	0.996412
SP140	1.07647	2.09553	2.6445	0.792409	0.428122	0.996412
RPS8P10	1.60766	2.07646	2.22367	0.9338	0.350407	0.996412
LIPE	1.84236	2.07352	1.90901	1.08617	0.277403	0.996412
KCNT1	1.12611	2.06773	1.99916	1.0343	0.300997	0.996412
FEV	1.14152	2.05702	2.31791	0.887444	0.37484	0.996412
NDUFS6	12.129	2.05193	3.05211	0.6723	0.501393	0.996412
AC011487.1	1.91415	2.04638	1.81856	1.12528	0.260472	0.996412
ADGRF3	3.03854	2.04553	1.53682	1.33102	0.183184	0.996412
SERHL	1.21059	2.04475	2.50728	0.815525	0.414772	0.996412
RBFOX3	2.00709	2.02705	1.7237	1.17599	0.2396	0.996412
GRM1	1.22871	2.02451	1.80808	1.1197	0.262841	0.996412
RBMS1	2.0927	2.02324	1.70772	1.18476	0.236111	0.996412
GDF5	1.05005	1.99421	2.57963	0.773061	0.439486	0.996412
HDAC9	2.44745	1.98326	1.85334	1.0701	0.284576	0.996412
AC092128.1	1.39476	1.98325	2.18748	0.906636	0.364599	0.996412
MPRIPP1	1.01167	1.98026	2.03016	0.975417	0.329353	0.996412
STRCP1	1.68441	1.97724	1.81725	1.08804	0.276578	0.996412
GTF2H4	69.0998	1.94754	3.11287	0.62564	0.531551	0.996412
AP002784.2	0.985086	1.94416	2.05565	0.945764	0.344269	0.996412
TRABD2A	2.96812	1.93624	1.55634	1.2441	0.213465	0.996412
PRELID1P1	1.50277	1.92888	1.66901	1.1557	0.247802	0.996412
ZIC3	1.1449	1.91773	2.06513	0.928623	0.353084	0.996412
TYRO3P	1.61496	1.91521	1.72816	1.10824	0.267759	0.996412
RPL15P18	1.28858	1.91374	1.71387	1.11662	0.264158	0.996412
APOA1	3.20095	1.91231	1.16345	1.64365	0.100248	0.996412
MMP23A	4.09127	1.89152	2.06946	0.914016	0.360709	0.996412
L1CAM	8.45316	1.88488	1.17059	1.61019	0.107357	0.996412
EPM2AIP1	1.72658	1.88327	3.32275	0.566782	0.570862	0.996412
FAM171A2	2.88609	1.86922	1.66783	1.12075	0.262396	0.996412
NXNL2	1.92811	1.86101	1.34232	1.38641	0.165622	0.996412
AC105233.5	2.19872	1.85466	2.29711	0.80739	0.419442	0.996412
RPS27P25	1.64211	1.85355	1.71193	1.08273	0.27893	0.996412
DUOXA2	1.14912	1.84774	2.16524	0.853365	0.393457	0.996412
LCP2	1.46522	1.84771	1.82971	1.00984	0.312574	0.996412
H3P47	1.7458	1.8471	2.06839	0.893011	0.371851	0.996412
ITGA11	6.45333	1.84124	1.33293	1.38135	0.167173	0.996412
GFI1B	2.79274	1.84101	1.19364	1.54235	0.122989	0.996412
DTX1	1.10334	1.83746	1.88656	0.973974	0.33007	0.996412
CRACR2A	2.56967	1.83346	1.55012	1.18278	0.236896	0.996412
TTYH1	1.95383	1.83162	1.91629	0.955819	0.339164	0.996412
ASGR1	2.18843	1.82249	1.37984	1.32079	0.18657	0.996412
CLCN3P1	2.89731	1.82007	1.41082	1.29008	0.197024	0.996412
AP001273.2	9.49589	1.81733	1.97435	0.92047	0.357327	0.996412
TNFRSF1B	4.95539	1.81514	1.20803	1.50257	0.132951	0.996412
NTF3	2.79569	1.79574	1.24175	1.44613	0.14814	0.996412
RPS20P22	1.45018	1.78946	1.94115	0.921858	0.356603	0.996412
CCL27	1.85499	1.7875	1.5661	1.14137	0.253716	0.996412
SPARC	6.03375	1.78726	1.34239	1.3314	0.183059	0.996412
BGLAP	2.86132	1.78274	1.73652	1.02662	0.3046	0.996412
AL022238.3	7.95472	1.78149	1.78816	0.996272	0.319118	0.996412
RNF103-CHMP3	1.8547	1.77802	1.8599	0.955975	0.339085	0.996412
DNM1P51	2.13943	1.76703	2.18339	0.809309	0.418338	0.996412
TRAPPC2B	3.57595	1.76154	1.15485	1.52534	0.127174	0.996412
ADAMTSL3	5.71298	1.76055	1.09853	1.60264	0.109014	0.996412
NFE2	1.03502	1.75614	1.84914	0.949706	0.342262	0.996412
AQP4	4.08253	1.75564	1.32748	1.32254	0.18599	0.996412
CYP2D6	1.77957	1.74565	1.86903	0.933986	0.350311	0.996412
RIMBP2	1.00418	1.74193	2.52374	0.690216	0.490059	0.996412
TSPAN2	1.29734	1.73128	2.08164	0.831691	0.405583	0.996412
MYO1H	1.48483	1.72651	2.58783	0.667167	0.504665	0.996412
ERBB4	1.94999	1.72624	2.24333	0.7695	0.441597	0.996412
PHRF1	49.3935	1.72398	1.70003	1.01409	0.310542	0.996412
GGACT	5.024	1.72278	1.15828	1.48736	0.136921	0.996412
REV3L	34.1911	1.71782	1.93243	0.888942	0.374034	0.996412
HHLA2	1.26695	1.70866	1.72779	0.988931	0.322697	0.996412
CALCRL	6.07103	1.70032	1.17873	1.44251	0.149159	0.996412
ACAT1	6.00848	1.69074	1.16788	1.4477	0.147701	0.996412
PGP	2.96057	1.68425	1.33901	1.25783	0.208452	0.996412
AF196969.1	2.04383	1.68372	2.03402	0.827782	0.407794	0.996412
WTAPP1	3.54669	1.67993	1.63467	1.02769	0.304095	0.996412
DNER	2.04939	1.67831	1.44941	1.15793	0.246894	0.996412
AC126177.6	2.94311	1.67472	1.28491	1.30337	0.192448	0.996412
FAM151A	2.46808	1.67437	1.27342	1.31487	0.188555	0.996412
DIRAS2	2.68538	1.67027	1.50743	1.10803	0.26785	0.996412
ANKRD40CL	1.56466	1.66361	1.52987	1.08742	0.276853	0.996412
OR7E108P	1.92964	1.66053	1.46705	1.13188	0.257683	0.996412
ELF5	1.44791	1.65887	2.15871	0.768456	0.442216	0.996412
PLG	2.92974	1.65164	1.09437	1.50922	0.131243	0.996412
RPL7AP60	1.5509	1.64664	1.70886	0.963588	0.335253	0.996412
ERAP2	4.39091	1.64189	1.27063	1.29219	0.19629	0.996412
ZNF90	1.12049	1.63084	1.8277	0.892292	0.372237	0.996412
ZNF22	1.43346	1.6308	1.72522	0.945269	0.344521	0.996412
KLK1	1.39913	1.62846	1.87672	0.867715	0.38555	0.996412
OR7E39P	2.47481	1.62409	1.4415	1.12667	0.259884	0.996412
SLC35D1	1.29825	1.62273	1.85337	0.875552	0.381274	0.996412
GOLGA6L10	5.03324	1.62221	2.31594	0.700456	0.483643	0.996412
SENP3-EIF4A1	29.6703	1.61739	1.04848	1.5426	0.122927	0.996412
SPECC1L-ADORA2A	18.5229	1.6122	1.45266	1.10982	0.267075	0.996412
PINLYP	3.28559	1.60696	1.41288	1.13737	0.255385	0.996412
DNAH12	2.20346	1.60193	1.57371	1.01793	0.30871	0.996412
NTSR2	1.18784	1.59781	1.86531	0.856592	0.391671	0.996412
SUSD1	3.20075	1.5889	1.4457	1.09906	0.271743	0.996412
TREHP1	1.45674	1.58692	1.84653	0.859404	0.390118	0.996412
ARHGAP24	1.89235	1.5812	1.75498	0.900979	0.3676	0.996412
KLF7	8.52835	1.58084	1.4118	1.11973	0.262827	0.996412
METTL7B	1.16316	1.57971	1.96478	0.804013	0.42139	0.996412
UBA52P6	1.06764	1.57757	1.90537	0.827958	0.407694	0.996412
RNF144B	4.87858	1.57251	0.995255	1.58	0.114106	0.996412
FOXN4	2.79048	1.56592	1.29226	1.21176	0.225603	0.996412
AL589987.1	2.61782	1.56538	1.14439	1.36787	0.171351	0.996412
HOMER1	13.1839	1.56476	1.4221	1.10031	0.271196	0.996412
CTNNA3	5.84383	1.55753	1.15752	1.34557	0.178441	0.996412
PHBP11	1.10585	1.55483	1.89232	0.821657	0.411272	0.996412
SPDYE16	1.18832	1.5535	2.54166	0.611214	0.541058	0.996412
SLC24A3	7.04525	1.54894	2.0173	0.767827	0.44259	0.996412
BEND5	2.49692	1.5456	1.27642	1.21089	0.225939	0.996412
CCDC152	4.81692	1.54379	1.00258	1.53983	0.123603	0.996412
LAPTM5	1.04794	1.54326	3.01879	0.511216	0.6092	0.996412
VENTXP5	4.02894	1.54122	0.981234	1.5707	0.116253	0.996412
AL133260.1	1.02724	1.5375	2.08732	0.73659	0.461372	0.996412
AQP5	1.47663	1.53057	1.54612	0.989939	0.322204	0.996412
ADTRP	1.76654	1.5283	1.51347	1.0098	0.31259	0.996412
KCNN3	1.81065	1.52511	2.24705	0.678715	0.497319	0.996412
OR5BK1P	1.02028	1.52175	2.24504	0.677827	0.497881	0.996412
AP001324.1	2.73354	1.51998	1.188	1.27945	0.200739	0.996412
TG	6.88888	1.51722	1.13415	1.33776	0.180974	0.996412
PALB2	6.44827	1.50813	1.11886	1.34791	0.177688	0.996412
NME9	1.025	1.50448	2.11585	0.711051	0.477053	0.996412
PDIA6	12.4269	1.50284	1.84093	0.816346	0.414302	0.996412
AC044787.1	1.76563	1.50281	1.93714	0.77579	0.437873	0.996412
ZNF663P	1.98479	1.49683	1.43944	1.03987	0.298401	0.996412
DSG1	3.95972	1.49368	1.22923	1.21513	0.224315	0.996412
EPHA8	3.1481	1.48777	1.2732	1.16853	0.242595	0.996412
CAPN6	2.30783	1.48597	1.34365	1.10592	0.268762	0.996412
AL359273.2	1.11624	1.48562	2.07222	0.71692	0.473424	0.996412
CACNA1I	2.61347	1.48215	1.70797	0.867787	0.385511	0.996412
AC000089.1	2.87818	1.48138	1.32044	1.12188	0.261912	0.996412
B4GALNT3	18.8045	1.48136	1.0314	1.43625	0.15093	0.996412
ZNF826P	2.77643	1.48086	1.15686	1.28007	0.200521	0.996412
RPS29P17	2.16804	1.48071	1.53476	0.964783	0.334653	0.996412
RASGRF1	2.01779	1.47962	2.09058	0.707756	0.479097	0.996412
EEF1A1P14	2.52556	1.47884	1.36413	1.08408	0.278327	0.996412
OBP2A	1.56999	1.47792	1.60183	0.922642	0.356194	0.996412
HLA-DRB6	5.11081	1.47714	0.874203	1.6897	0.0910847	0.996412
HSPA8P14	1.62934	1.47527	1.47816	0.998042	0.318259	0.996412
RNF138P1	1.95302	1.47512	1.29235	1.14143	0.25369	0.996412
AGPAT4	1.90587	1.47379	1.68948	0.87233	0.383028	0.996412
AP001636.2	2.75734	1.46899	1.46331	1.00389	0.315433	0.996412
FLT3LG	3.18683	1.46877	1.16698	1.25861	0.208171	0.996412
BOLA2P2	2.06604	1.46602	1.37288	1.06785	0.28559	0.996412
TTC9B	3.65703	1.45804	1.30703	1.11554	0.26462	0.996412
DUSP19	1.65919	1.45371	2.48868	0.584128	0.559135	0.996412
MS4A4E	2.68725	1.45203	1.27431	1.13946	0.254511	0.996412
POPDC2	8.40609	1.4475	0.899995	1.60835	0.107759	0.996412
SNTG2	2.7977	1.4464	1.26399	1.14431	0.252494	0.996412
TOMM40P1	8.68437	1.44603	0.905058	1.59772	0.110106	0.996412
RPL7P9	10.2709	1.44498	0.968771	1.49157	0.135813	0.996412
CCDC62	1.84086	1.43722	1.90249	0.755438	0.449986	0.996412
HHIPL2	2.61079	1.4331	1.22346	1.17136	0.241455	0.996412
F10	4.7193	1.4274	1.50725	0.947026	0.343625	0.996412
CTNNA2	10.7713	1.42551	0.855586	1.66612	0.0956902	0.996412
PVRIG	1.29338	1.4207	1.76717	0.803938	0.421433	0.996412
NIM1K	3.79629	1.41911	1.19291	1.18962	0.234196	0.996412
CYP46A1	7.52606	1.41721	1.23164	1.15067	0.24987	0.996412
CLDN1	5.67342	1.41702	1.10764	1.27932	0.200784	0.996412
MBL1P	1.83283	1.4131	1.37372	1.02866	0.303638	0.996412
AL031727.1	1.35531	1.4112	1.92923	0.731482	0.464485	0.996412
CASKIN1	0.997022	1.41026	2.39122	0.589766	0.555347	0.996412
RPSAP45	1.04357	1.40828	2.09799	0.671252	0.50206	0.996412
AC064862.1	1.4902	1.40828	1.44443	0.974974	0.329573	0.996412
ANGPTL4	2.98969	1.40825	1.05151	1.33927	0.180483	0.996412
CHRNA4	7.55849	1.4081	1.00787	1.3971	0.162383	0.996412
PLD4	4.5998	1.4065	0.914477	1.53804	0.12404	0.996412
AC007546.3	1.41656	1.40561	1.58632	0.886083	0.375573	0.996412
KLHDC7B	1.70454	1.4054	3.2708	0.429682	0.667427	0.996412
SMIM5	6.08672	1.40401	1.00686	1.39444	0.163186	0.996412
CCDC144CP	1.21746	1.3988	1.58058	0.884991	0.376161	0.996412
NEXN	1.16605	1.39546	1.80613	0.772626	0.439744	0.996412
NBEAP3	1.24171	1.39417	2.51782	0.553721	0.57977	0.996412
EFHB	9.90819	1.39365	1.02857	1.35494	0.175435	0.996412
CTSO	93.6118	1.39281	4.08255	0.341163	0.732981	0.996412
MTND6P4	2.02464	1.39212	1.56947	0.886998	0.37508	0.996412
NNT	4.37423	1.39159	1.40957	0.98725	0.32352	0.996412
MTHFD1P1	1.46712	1.38571	1.92226	0.720872	0.470988	0.996412
RSPH4A	2.25096	1.38315	2.24654	0.615679	0.538106	0.996412
AC106872.2	2.06821	1.37932	1.20754	1.14226	0.253347	0.996412
ATP6V1B1	0.987968	1.37795	2.56473	0.53727	0.591081	0.996412
OVGP1	5.67436	1.36435	0.82354	1.65669	0.0975822	0.996412
CYP11A1	7.69104	1.36191	0.953049	1.429	0.153004	0.996412
NEFL	1.80043	1.36103	2.37159	0.573889	0.566043	0.996412
PCP4L1	5.55205	1.36014	0.854252	1.5922	0.111341	0.996412
SLCO2A1	6.2979	1.35992	1.44892	0.938578	0.347948	0.996412
RPL23AP65	2.43562	1.35623	1.42406	0.952369	0.34091	0.996412
TLR6	3.27268	1.35616	1.99666	0.679214	0.497002	0.996412
CCDC200	1.34424	1.35362	1.67384	0.80869	0.418693	0.996412
KY	2.68535	1.3534	1.36865	0.988859	0.322732	0.996412
FAHD2P1	2.92917	1.35113	1.09498	1.23394	0.217227	0.996412
SLC26A4	1.12598	1.3506	1.95877	0.689513	0.4905	0.996412
GSTM2	1.98894	1.34613	1.62684	0.827452	0.407981	0.996412
C8G	5.31217	1.34597	0.872103	1.54336	0.122744	0.996412
PTCRA	3.59153	1.34438	1.06184	1.26609	0.205482	0.996412
DIPK1C	1.08203	1.34234	2.82896	0.474499	0.635144	0.996412
ZCCHC24	1.8775	1.33722	2.08023	0.642823	0.520339	0.996412
DPY19L2P2	1.10929	1.33693	2.0126	0.664282	0.50651	0.996412
FIGNL2	1.5192	1.33687	1.49139	0.896396	0.370041	0.996412
TNS4	1.03834	1.33065	1.78347	0.746102	0.455606	0.996412
SLURP2	2.01787	1.32854	1.69753	0.782628	0.433846	0.996412
GABBR2	3.24448	1.32612	1.35115	0.981475	0.326359	0.996412
PTPRN	11.902	1.32081	0.915034	1.44346	0.148891	0.996412
RPGRIP1	7.04301	1.31667	0.855868	1.5384	0.12395	0.996412
CD101	10.1704	1.31639	0.790389	1.6655	0.0958138	0.996412
RAC1P2	1.36033	1.31637	2.00811	0.655529	0.512128	0.996412
IMPG1	5.53651	1.31011	1.10046	1.19052	0.233844	0.996412
ADAMTS6	6.90038	1.30783	0.986123	1.32623	0.184763	0.996412
CACNB4	1.42887	1.30774	1.65971	0.787931	0.430737	0.996412
ST8SIA2	6.63322	1.30698	0.997031	1.31087	0.189902	0.996412
TFCP2L1	1.29685	1.30509	1.66088	0.785786	0.431993	0.996412
PIPSL	1.44864	1.3035	1.62769	0.800831	0.42323	0.996412
SLC16A13	2.09567	1.30059	1.52702	0.851719	0.39437	0.996412
KCNJ10	1.46301	1.29591	1.93038	0.671323	0.502015	0.996412
SCART1	6.19062	1.29571	1.12647	1.15024	0.250047	0.996412
CFAP52	9.8744	1.29537	0.817084	1.58535	0.112886	0.996412
AL133500.1	1.7198	1.29455	2.44426	0.529628	0.59637	0.996412
AC241584.2	2.89224	1.2909	1.34843	0.957335	0.338398	0.996412
FGFR2	14.128	1.28856	0.790183	1.63071	0.102951	0.996412
PPP1R36	1.33825	1.28095	1.55988	0.821188	0.411539	0.996412
PAPLN	4.9708	1.28082	1.06672	1.20071	0.229863	0.996412
SRRM5	6.22327	1.28075	4.04923	0.316295	0.751779	0.996412
TMEM121B	20.7212	1.2802	3.70772	0.345281	0.729883	0.996412
SLC5A11	5.35465	1.27428	0.87937	1.44908	0.147314	0.996412
DMRTC1	1.5176	1.27357	1.55178	0.820716	0.411808	0.996412
AURKAP1	4.21533	1.27242	1.50329	0.846419	0.397319	0.996412
SCN3B	1.14781	1.27233	1.91769	0.663468	0.507031	0.996412
AC126603.1	3.72496	1.26766	1.04574	1.21221	0.225431	0.996412
FDPSP7	1.76099	1.26322	1.49194	0.846697	0.397164	0.996412
SULT1C2	1.73483	1.25752	1.91267	0.657469	0.510879	0.996412
ADCY10	3.75672	1.24964	1.4539	0.85951	0.390059	0.996412
AC008026.1	2.6948	1.24959	1.22946	1.01638	0.30945	0.996412
AC136612.1	3.05526	1.24849	1.39926	0.89225	0.372259	0.996412
AC004678.1	3.54564	1.24471	1.20703	1.03122	0.302439	0.996412
BCAT1	5.09633	1.24439	1.22243	1.01797	0.308693	0.996412
FHL2	7.92929	1.24417	0.745401	1.66913	0.0950915	0.996412
SGK2	3.05705	1.2436	1.81596	0.684815	0.49346	0.996412
POLH	11.0686	1.24252	1.50325	0.826557	0.408488	0.996412
ENTPD3	7.62964	1.23788	1.05111	1.17769	0.238921	0.996412
CRX	2.19763	1.23693	1.66386	0.743412	0.457232	0.996412
SCN5A	6.75395	1.23138	1.21217	1.01585	0.309701	0.996412
NYAP1	2.75136	1.2272	1.1966	1.02557	0.305093	0.996412
ZFP69	2.932	1.22623	1.42304	0.861693	0.388857	0.996412
C1QTNF2	3.10957	1.22424	1.01809	1.20249	0.229175	0.996412
IKBKGP1	22.2659	1.2225	3.61792	0.337901	0.735438	0.996412
AC097460.1	1.85729	1.2212	1.37554	0.887798	0.374649	0.996412
PLCL1	2.93848	1.21874	1.20329	1.01284	0.311135	0.996412
RBX1	14.8461	1.21536	0.908999	1.33703	0.181213	0.996412
TRIM36	44.7558	1.21161	0.720304	1.68208	0.0925537	0.996412
TF	11.1523	1.2104	0.996591	1.21454	0.224541	0.996412
POTEE	2.24531	1.20394	2.0847	0.577512	0.563594	0.996412
OLFML1	1.58983	1.20345	1.48886	0.808298	0.418919	0.996412
AL035461.3	2.61554	1.20248	2.34961	0.511777	0.608807	0.996412
CYP3A43	2.38794	1.19898	1.23142	0.973657	0.330227	0.996412
KCNJ12	2.66047	1.19522	1.37079	0.871921	0.383251	0.996412
CLIC5	1.01352	1.19378	2.47661	0.482023	0.629789	0.996412
CHST5	2.34324	1.18966	1.70041	0.699632	0.484157	0.996412
SARDH	1.60286	1.1848	1.433	0.826797	0.408352	0.996412
PDIA2	8.14875	1.18412	1.19501	0.990883	0.321743	0.996412
AL929602.1	2.1026	1.18207	2.03312	0.581405	0.560967	0.996412
SP7	1.03489	1.18135	2.43842	0.484475	0.628049	0.996412
HEPN1	3.45946	1.18007	2.43327	0.484975	0.627694	0.996412
ZNF594	2.65553	1.18007	1.18383	0.996821	0.318852	0.996412
TEX54	4.88715	1.17962	1.1983	0.98441	0.324914	0.996412
RPS15P4	6.19314	1.17833	0.769048	1.53219	0.125475	0.996412
PTH1R	4.57675	1.17521	1.29185	0.909711	0.362975	0.996412
PLXNC1	5.22347	1.17338	1.52928	0.767273	0.442919	0.996412
RPL14P3	2.79575	1.16963	0.964351	1.21287	0.22518	0.996412
AC104563.1	2.64461	1.16725	1.09783	1.06323	0.287676	0.996412
CLEC1A	4.73296	1.16303	1.15893	1.00354	0.315603	0.996412
ADAMTS2	1.1445	1.16216	2.38094	0.488108	0.625474	0.996412
AL009174.1	2.84846	1.16012	1.54753	0.749661	0.453459	0.996412
AC118281.1	45.9587	1.15821	2.57041	0.450594	0.652282	0.996412
PREX2	10.1535	1.15606	1.1013	1.04972	0.293846	0.996412
ZBTB45P2	24.2039	1.15578	1.10788	1.04323	0.296841	0.996412
CYP21A2	1.2886	1.15472	2.17696	0.530426	0.595817	0.996412
AC106782.1	4.34667	1.15444	1.12122	1.02962	0.303187	0.996412
ISL1	3.01079	1.15391	1.12298	1.02754	0.304166	0.996412
PIGY	13.0096	1.1504	1.82306	0.631026	0.528023	0.996412
PIGU	14.1482	1.14942	0.875166	1.31337	0.189059	0.996412
CATSPERB	1.3181	1.14477	1.7791	0.643454	0.51993	0.996412
ZNF440	5.96776	1.14315	1.30931	0.873097	0.38261	0.996412
ZNF816-ZNF321P	2.81002	1.13873	2.53524	0.449161	0.653316	0.996412
GZMM	1.10808	1.13601	1.91352	0.593674	0.55273	0.996412
PCSK5	5.60081	1.13567	0.843988	1.3456	0.178433	0.996412
KCNJ4	2.01576	1.13011	1.43145	0.789485	0.429829	0.996412
COL3A1	0.989696	1.12832	4.24812	0.265604	0.790544	0.996412
SERPINA3	8.68211	1.12541	1.61693	0.696017	0.486418	0.996412
HCLS1	3.12193	1.12406	1.0097	1.11326	0.265596	0.996412
LAMB4	6.47955	1.1229	1.19917	0.936401	0.349067	0.996412
LINC00514	4.20126	1.12219	1.03648	1.0827	0.278943	0.996412
TCTE1	1.74007	1.11413	1.56789	0.710591	0.477338	0.996412
SLC47A2	1.60796	1.11328	1.70226	0.654	0.513112	0.996412
PITPNB	12.1408	1.11322	0.777501	1.43179	0.152204	0.996412
CTRB1	1.67499	1.11037	1.48986	0.745282	0.456102	0.996412
BMS1P10	3.8818	1.10809	0.980593	1.13002	0.258468	0.996412
GNRH1	1.69062	1.10731	1.45993	0.75847	0.44817	0.996412
LHX6	6.35725	1.1073	1.01711	1.08868	0.276297	0.996412
ADRA2B	1.30696	1.10682	1.91116	0.579133	0.562499	0.996412
HHIPL1	1.5561	1.1058	1.63793	0.675121	0.499599	0.996412
IGSF9B	16.0136	1.10507	2.40032	0.460386	0.645239	0.996412
GPANK1	8.32702	1.10436	2.05405	0.53765	0.590819	0.996412
AL121871.1	0.999218	1.1043	2.15174	0.513212	0.607803	0.996412
RASAL1	2.21765	1.10426	1.42272	0.776163	0.437653	0.996412
HNRNPLP1	1.0975	1.10247	1.77963	0.61949	0.535593	0.996412
IFI27L2	14.0919	1.10173	1.84986	0.595575	0.551459	0.996412
FAM106C	1.16174	1.10127	2.18806	0.503312	0.614745	0.996412
ZNF526	1.04411	1.09957	3.63779	0.302262	0.762452	0.996412
AKR7A3	2.47246	1.09826	1.15382	0.951845	0.341176	0.996412
PPP1R27	2.99042	1.09757	1.1255	0.975183	0.329469	0.996412
SEMA3G	1.55273	1.09662	2.04725	0.535655	0.592197	0.996412
RPS15P5	2.18986	1.09565	1.29812	0.844032	0.398651	0.996412
TMPRSS3	1.49631	1.09433	1.88185	0.58152	0.56089	0.996412
MTDHP1	1.1825	1.09185	1.69712	0.643354	0.519994	0.996412
MEF2B	31.6947	1.09144	0.770142	1.41719	0.156426	0.996412
RPSAP19	5.92351	1.08961	1.06288	1.02514	0.305295	0.996412
AC125807.1	3.29697	1.08813	1.18163	0.920879	0.357114	0.996412
RNF112	1.87012	1.08603	1.46061	0.74355	0.457149	0.996412
RPL12P14	1.82023	1.08562	1.56394	0.694156	0.487585	0.996412
AGAP14P	3.43035	1.08522	1.12907	0.96116	0.336472	0.996412
SLED1	3.43754	1.08454	1.00805	1.07588	0.281981	0.996412
SPARCL1	2.55528	1.08395	1.21549	0.891779	0.372512	0.996412
FKBP1C	1.61866	1.08391	1.89969	0.570571	0.56829	0.996412
IGFALS	1.38827	1.08381	2.26598	0.478295	0.63244	0.996412
DLX5	1.40487	1.08333	1.40992	0.768361	0.442272	0.996412
AL160286.1	5.99854	1.0825	0.875628	1.23625	0.216364	0.996412
GAPDHP52	1.3849	1.08083	1.52587	0.708335	0.478737	0.996412
TSPY26P	2.55366	1.07955	1.18397	0.911804	0.361872	0.996412
PPIAP22	43.0963	1.079	0.791157	1.36383	0.172621	0.996412
HSPA8P1	2.12368	1.07656	1.78193	0.604152	0.545743	0.996412
AL157893.1	2.05824	1.07511	1.5649	0.687019	0.492071	0.996412
SLC51B	1.01137	1.07473	1.95609	0.549429	0.582711	0.996412
AL035456.1	1.06099	1.07468	2.26222	0.475057	0.634747	0.996412
RPL7P16	1.81174	1.07411	1.21567	0.883555	0.376936	0.996412
NPM1P26	1.34821	1.07223	1.73227	0.618974	0.535934	0.996412
CCL8	1.64355	1.06734	1.85441	0.575567	0.564908	0.996412
KRT8P36	1.25491	1.0658	1.75359	0.607783	0.543332	0.996412
KIF17	6.13623	1.06347	0.902466	1.1784	0.238637	0.996412
LMO2	5.51058	1.06203	0.817212	1.29958	0.193747	0.996412
FLT3	2.85266	1.06043	1.75917	0.602804	0.546639	0.996412
CCDC81	11.8832	1.05791	0.65572	1.61335	0.106668	0.996412
AC104619.3	1.37936	1.05599	2.2736	0.464456	0.642321	0.996412
PDE6A	0.98235	1.05537	3.02209	0.349217	0.726926	0.996412
NUDT10	1.38596	1.05518	2.02269	0.521671	0.601899	0.996412
HERC6	44.9036	1.0541	1.11081	0.948955	0.342644	0.996412
RNF222	0.980072	1.05275	2.50109	0.420918	0.673815	0.996412
FAM166C	1.01417	1.05171	2.51701	0.41784	0.676064	0.996412
SYNE1	33.0806	1.04978	0.726447	1.44509	0.148432	0.996412
ATAD3A	12.338	1.0494	0.755265	1.38944	0.164699	0.996412
GAPDHP22	1.21986	1.04627	1.5742	0.664631	0.506286	0.996412
NACA4P	1.7202	1.04347	1.37216	0.760454	0.446983	0.996412
AC007182.2	3.03935	1.04297	1.29226	0.807092	0.419614	0.996412
RAMP2	1.57896	1.04214	1.95629	0.532712	0.594233	0.996412
AC012158.1	9.44742	1.04155	0.840893	1.23862	0.215485	0.996412
SLC16A4	2.27262	1.04023	1.44659	0.719088	0.472087	0.996412
GRIN3A	4.29854	1.03663	0.998097	1.03861	0.298988	0.996412
MAP3K15	1.63648	1.03634	1.37946	0.75126	0.452496	0.996412
PRDX3P1	1.54896	1.03317	1.94017	0.532515	0.594369	0.996412
POTEH	1.80127	1.03314	2.53439	0.407646	0.683533	0.996412
IL1R2	1.01551	1.03257	2.11464	0.488295	0.625341	0.996412
AC034236.1	1.44596	1.02767	2.26596	0.453523	0.650172	0.996412
SH2D3A	9.82011	1.02596	0.71049	1.44402	0.148733	0.996412
NR5A2	11.0433	1.02518	0.642616	1.59532	0.110641	0.996412
GLT8D2	2.27245	1.02452	1.35522	0.755977	0.449663	0.996412
ZFHX4	5.91323	1.0222	2.04288	0.500374	0.616812	0.996412
MGAT5B	8.77062	1.02193	0.858938	1.18976	0.234141	0.996412
SPIB	1.27353	1.01986	1.59877	0.637902	0.523538	0.996412
AGAP12P	3.21964	1.01916	1.24525	0.818442	0.413105	0.996412
TMEM178A	2.65592	1.01508	1.42575	0.711963	0.476488	0.996412
RPS6P25	2.01013	1.01325	1.44998	0.698805	0.484674	0.996412
PRDM1	2.65455	1.01294	1.69474	0.597695	0.550043	0.996412
TCF4	34.3303	1.00942	0.664072	1.52005	0.128498	0.996412
AP000787.2	1.37312	1.00761	1.6184	0.622597	0.533549	0.996412
PTCHD3P1	10.6557	1.00746	1.79621	0.560882	0.574878	0.996412
AC245033.3	7.89738	1.00468	0.693104	1.44954	0.147186	0.996412
KLKB1	2.85172	1.0044	0.965189	1.04062	0.298052	0.996412
BLOC1S3	6.22835	1.00294	0.765346	1.31044	0.190047	0.996412
CEP126	7.00775	1.00156	1.27066	0.788222	0.430567	0.996412
SATB1	2.2534	1.0013	1.35534	0.738781	0.46004	0.996412
SH3RF2	1.78364	0.999404	1.43311	0.697366	0.485574	0.996412
AC112907.2	2.80639	0.999054	1.22006	0.818855	0.412869	0.996412
MBD3L2B	1.7237	0.998514	1.87921	0.531349	0.595177	0.996412
INPP5D	6.33543	0.997226	1.30845	0.762143	0.445975	0.996412
IGF2BP2	1.95739	0.995842	1.74248	0.571508	0.567655	0.996412
ADHFE1	2.88618	0.993668	1.29979	0.764482	0.44458	0.996412
FTH1P10	5.37134	0.993186	1.04581	0.949684	0.342273	0.996412
TBC1D30	1.56952	0.992785	1.78491	0.55621	0.578068	0.996412
AP000873.1	4.14487	0.992211	1.38666	0.715541	0.474275	0.996412
TRANK1	32.2087	0.991302	0.960386	1.03219	0.301982	0.996412
PRR5L	1.13016	0.990593	2.36383	0.419062	0.675171	0.996412
RPL3P2	3.81753	0.990381	2.52882	0.391638	0.695326	0.996412
SHISA8	3.3286	0.989479	1.12035	0.883184	0.377137	0.996412
SNCG	1.62068	0.989321	1.61169	0.613839	0.539321	0.996412
DENND11	338.044	0.987224	1.2422	0.794741	0.426764	0.996412
AC117378.1	4.6467	0.985904	2.09582	0.470415	0.638058	0.996412
SESN3	4.06374	0.985043	1.62795	0.605082	0.545125	0.996412
FAM13C	3.4481	0.984711	1.15412	0.853213	0.393541	0.996412
LOX	53.0083	0.969884	0.602402	1.61003	0.107392	0.996412
DPF3	18.8151	0.968424	0.630464	1.53605	0.124526	0.996412
PCDHA3	1.43539	0.965661	2.30949	0.418127	0.675854	0.996412
TNNC1	3.29665	0.962505	1.47699	0.651666	0.514617	0.996412
RBBP4P2	1.0674	0.96244	2.2521	0.427351	0.669123	0.996412
ACVR1	8.50783	0.962223	1.78565	0.538866	0.589979	0.996412
ZSCAN12P1	2.26375	0.960528	1.33819	0.717779	0.472893	0.996412
AC243919.1	1720.73	0.959673	1.33689	0.717842	0.472855	0.996412
SYNM	24.1343	0.957293	2.39067	0.400429	0.68884	0.996412
AC136475.10	2.48871	0.955568	1.2401	0.77056	0.440968	0.996412
TACR2	3.00784	0.95386	0.982534	0.970816	0.33164	0.996412
DPP4	9.26103	0.949336	0.719682	1.31911	0.187134	0.996412
CTRB2	2.49102	0.942306	1.94909	0.48346	0.628769	0.996412
AC115990.1	1.25671	0.941572	2.09027	0.450454	0.652383	0.996412
RPS2P4	1.87267	0.941248	1.59982	0.588347	0.5563	0.996412
AC131274.3	1.70215	0.935991	1.83731	0.509434	0.610448	0.996412
ASTL	2.26983	0.931949	1.2503	0.745382	0.456041	0.996412
SFXN5	54.2558	0.931634	0.56953	1.63579	0.101883	0.996412
RAPGEFL1	48.0224	0.930658	0.689186	1.35037	0.176896	0.996412
RPSAP70	4.1687	0.930317	1.06697	0.871924	0.38325	0.996412
AL133547.1	2.3209	0.929965	1.18741	0.783191	0.433515	0.996412
RNMT	145.441	0.928942	0.761174	1.22041	0.222311	0.996412
ANKRD36C	11.5154	0.928284	1.14768	0.808833	0.418611	0.996412
THSD7A	9.04507	0.925332	0.883015	1.04792	0.294674	0.996412
BPIFB1	5.20356	0.924881	0.911941	1.01419	0.310492	0.996412
SLC45A2	2.77255	0.92436	1.15333	0.801473	0.422858	0.996412
MROH6	12.7634	0.923611	0.896254	1.03052	0.302765	0.996412
DDX39B	31.663	0.922292	0.812223	1.13552	0.256159	0.996412
IRS4	4.63148	0.921431	0.762681	1.20815	0.226991	0.996412
C9orf131	1.66562	0.921177	1.70507	0.540256	0.58902	0.996412
STX1B	3.31215	0.919609	1.28404	0.716183	0.473878	0.996412
RPL23AP18	2.47232	0.919224	1.16024	0.792273	0.428201	0.996412
FUCA2	1.4473	0.918503	1.6295	0.563672	0.572978	0.996412
APOE	2.53067	0.918415	1.45446	0.631448	0.527747	0.996412
DDX11L1	2.01627	0.918334	2.49138	0.368604	0.712423	0.996412
OR2B6	2.50017	0.918316	1.25578	0.731272	0.464613	0.996412
AHSG	1.90088	0.915425	1.42629	0.641823	0.520988	0.996412
SGCB	6.25386	0.914901	0.961381	0.951653	0.341273	0.996412
TUBBP1	4.73644	0.913694	0.875077	1.04413	0.296425	0.996412
PPIAP35	1.2449	0.912666	1.5244	0.598703	0.549371	0.996412
EXTL1	1.09998	0.911835	1.61795	0.563575	0.573044	0.996412
HNRNPA1P8	2.21765	0.911649	1.23287	0.739452	0.459632	0.996412
SHOC2	11.2624	0.91065	1.16001	0.785037	0.432432	0.996412
RPSAP26	1.86624	0.910045	2.90278	0.313508	0.753895	0.996412
BMP7	5.93963	0.90971	0.915201	0.994	0.320223	0.996412
MATN3	3.84957	0.908371	0.932859	0.973749	0.330181	0.996412
GAD1	5.22328	0.908057	0.865226	1.0495	0.293947	0.996412
SH3D21	10.104	0.90654	0.775582	1.16885	0.242463	0.996412
ADGRL2	8.69247	0.902745	0.621948	1.45148	0.146646	0.996412
ZNF81	3.35506	0.902461	1.11425	0.809927	0.417982	0.996412
MMP9	1.71926	0.896636	1.47	0.609958	0.54189	0.996412
AP001636.1	2.08221	0.896526	1.49164	0.601032	0.547819	0.996412
EEF1A1P7	1.82016	0.895415	1.24454	0.719476	0.471847	0.996412
CSPG4	3.40342	0.89517	1.00444	0.891213	0.372815	0.996412
MORF4L1P1	1.78227	0.894921	1.65944	0.539291	0.589686	0.996412
FAM221B	3.42578	0.894163	1.46242	0.611425	0.540918	0.996412
CMTM3	4.54984	0.891841	1.00699	0.885648	0.375807	0.996412
DNAAF1	19.4189	0.887958	0.863465	1.02837	0.303778	0.996412
RPL5P30	1.97422	0.887489	1.5494	0.572795	0.566784	0.996412
TXNDC12	6.23505	0.887463	0.975998	0.909287	0.363198	0.996412
ESCO2	16.4672	0.883696	1.3272	0.665832	0.505518	0.996412
AC138035.3	1.15834	0.878778	2.90087	0.302936	0.761939	0.996412
PKD1P6	23.7111	0.878769	0.843456	1.04187	0.297473	0.996412
KCNG2	1.13046	0.87776	2.09482	0.419014	0.675206	0.996412
SKOR1	3.64317	0.875156	0.889449	0.983931	0.32515	0.996412
SLC35F1	1.6404	0.87415	1.56351	0.559094	0.576097	0.996412
FOXO3B	2.97555	0.873999	1.31313	0.665586	0.505676	0.996412
S100A9	5.2429	0.872944	0.9587	0.91055	0.362532	0.996412
AL645949.1	1.02124	0.871215	2.01012	0.433416	0.664713	0.996412
PPP1R14BP3	2.72865	0.869004	1.32061	0.658034	0.510516	0.996412
RPL7AP11	15.516	0.868992	0.527349	1.64785	0.0993835	0.996412
ARL6IP6	20.4729	0.868557	1.10065	0.789133	0.430034	0.996412
TERT	10.398	0.867734	1.21739	0.712784	0.47598	0.996412
NXF3	2.83034	0.866945	1.18665	0.730582	0.465035	0.996412
HRH3	2.03799	0.863702	1.4402	0.599709	0.5487	0.996412
AP000936.3	1.77555	0.862872	1.53774	0.561129	0.574709	0.996412
FOXC1	6.53744	0.862791	0.769028	1.12192	0.261895	0.996412
SLC25A42	10.6918	0.862502	0.92633	0.931095	0.351804	0.996412
CFAP57	6.46197	0.860471	1.26763	0.678805	0.497261	0.996412
NPHP3-ACAD11	3.46758	0.858795	1.93409	0.44403	0.657021	0.996412
TTTY14	2.49088	0.857812	1.22162	0.702193	0.482559	0.996412
CA4	3.10026	0.857055	1.11275	0.770216	0.441172	0.996412
ANK1	20.2108	0.854304	0.563452	1.5162	0.129469	0.996412
KIAA1549L	1.04161	0.851291	1.95587	0.43525	0.663381	0.996412
TEN1-CDK3	46.8749	0.847962	0.603979	1.40396	0.160331	0.996412
PRODH	5.34288	0.847626	1.07747	0.786681	0.431468	0.996412
TSHZ2	10.5964	0.846424	1.09972	0.76967	0.441496	0.996412
AC113935.1	8.69614	0.845617	0.752227	1.12415	0.260949	0.996412
RIPOR3	1.26685	0.844682	1.8807	0.449132	0.653337	0.996412
FBLN1	15.5832	0.844605	0.515509	1.63839	0.10134	0.996412
GRAMD1B	1.03441	0.844304	2.18586	0.386257	0.699306	0.996412
TEX14	6.29265	0.842813	0.866807	0.972318	0.330892	0.996412
SLC4A9	2.49462	0.840313	1.32544	0.633988	0.526089	0.996412
PIGR	1.34925	0.840311	1.78936	0.469615	0.63863	0.996412
TOMM40P4	8.44641	0.840034	0.616206	1.36324	0.172808	0.996412
AC137834.1	26.0488	0.838763	1.27487	0.657922	0.510588	0.996412
SEPTIN7P9	1.47914	0.830204	1.65622	0.501264	0.616185	0.996412
ADGRB1	6.26698	0.826435	0.986069	0.838111	0.401968	0.996412
NRG4	10.6479	0.826012	0.64785	1.27501	0.202307	0.996412
PHGR1	21.9851	0.823868	0.57729	1.42713	0.153543	0.996412
RPSAP14	1.21274	0.823769	2.01357	0.409109	0.68246	0.996412
AC002310.4	42.4171	0.823686	0.878409	0.937702	0.348398	0.996412
VWCE	2.32562	0.823125	1.45173	0.566995	0.570718	0.996412
BUB1B	1.96613	0.822215	2.02181	0.406674	0.684248	0.996412
RPS2P17	7.60904	0.822211	1.01868	0.807134	0.419589	0.996412
ZBTB7C	9.38952	0.821412	0.968542	0.848092	0.396387	0.996412
FOS	6.17483	0.820859	0.810931	1.01224	0.311422	0.996412
PATL2	4.53938	0.820757	1.00737	0.814755	0.415213	0.996412
EIF2S2P4	2.45754	0.819972	1.84198	0.445157	0.656206	0.996412
CDHR2	5.59077	0.818224	1.35697	0.602977	0.546524	0.996412
AC135721.1	3.06908	0.817779	0.993357	0.823248	0.410367	0.996412
ZNF286B	31.4167	0.81688	1.22948	0.664411	0.506427	0.996412
OLIG1	11.0629	0.816683	0.651659	1.25324	0.210119	0.996412
PROS1	39.3043	0.815868	0.953242	0.855888	0.39206	0.996412
PKD2L1	1.30636	0.815851	2.36583	0.344848	0.730209	0.996412
DLGAP3	7.69588	0.815821	0.674411	1.20968	0.226402	0.996412
RPL24P2	9.21734	0.814383	0.769524	1.05829	0.289921	0.996412
EEF1A1P8	2.44847	0.811571	1.1889	0.682624	0.494845	0.996412
MARCHF10	1.96121	0.811177	1.3569	0.597817	0.549962	0.996412
[truncated: 13,866 more rows]

## Sheet: ENZAvsDHT
GeneName	baseMean	log2FoldChange	lfcSE	stat	pvalue	padj
NCAPD3	203.667	-2.052	0.189735	-10.8151	2.91997e-27	4.17818e-23
SGK1	280.321	-2.72903	0.304939	-8.94944	3.57284e-19	2.55619e-15
TMPRSS2	8326.68	-0.888559	0.108047	-8.22383	1.97108e-16	9.4014e-13
CYP2U1	805.698	-1.07751	0.131718	-8.18039	2.8292e-16	1.01208e-12
SLC41A1	2400.82	-0.936106	0.118335	-7.91065	2.56041e-15	7.32739e-12
ERRFI1	959.881	-1.27865	0.169702	-7.53463	4.89707e-14	1.16787e-10
BAMBI	687.234	0.910462	0.127423	7.14521	8.98606e-13	1.83688e-09
FOSL2	1342.94	-0.682568	0.107702	-6.33754	2.33462e-10	3.81772e-07
STEAP4	29.3414	-3.23869	0.511382	-6.3332	2.40125e-10	3.81772e-07
MAF	683.75	-1.46991	0.238554	-6.16172	7.19589e-10	1.02966e-06
IGF1R	1012.91	-0.928412	0.154925	-5.99265	2.06453e-09	2.68558e-06
CENPN	2790.6	-0.902615	0.161543	-5.58745	2.30433e-08	2.74772e-05
NKD1	171.086	0.930976	0.169487	5.4929	3.95392e-08	4.35205e-05
CHKA	831.442	-0.437185	0.0801861	-5.45213	4.97703e-08	5.08688e-05
TUBA3D	111.893	-1.45264	0.269705	-5.38601	7.20391e-08	6.87205e-05
TMCC3	83	-1.91483	0.358752	-5.33747	9.42533e-08	8.42919e-05
TNFRSF10B	3152.09	-0.533397	0.100622	-5.30098	1.1518e-07	9.6948e-05
GADD45G	273.027	-0.907181	0.172403	-5.26197	1.4252e-07	0.000113295
SLC2A3	32.6304	-2.6798	0.51236	-5.2303	1.69234e-07	0.000127451
CHST2	30.7243	-2.11093	0.416897	-5.06342	4.11811e-07	0.00029463
NR4A1	367.436	-1.04356	0.207719	-5.02392	5.06272e-07	0.000344964
NKX3-1	16393	-0.709226	0.144158	-4.91977	8.66445e-07	0.000563544
WIPI1	220.365	-0.824834	0.168653	-4.89073	1.00463e-06	0.000625013
TTN	121.659	-1.85677	0.38129	-4.86971	1.11765e-06	0.000666352
TWIST1	339.238	-0.651063	0.134594	-4.83725	1.31647e-06	0.000753496
ZNF554	23.6704	-3.33045	0.690489	-4.82332	1.41187e-06	0.00077702
TSC22D1	5266.78	-0.449104	0.0939241	-4.78157	1.73935e-06	0.00088887
TIPARP	318.02	-1.45063	0.303217	-4.78414	1.71723e-06	0.00088887
AC008012.1	40.5682	19.848	4.22555	4.69714	2.63833e-06	0.00130179
PMEPA1	5120.24	-0.74829	0.161944	-4.62067	3.82509e-06	0.00182444
CCDC141	106.258	-2.33914	0.513313	-4.55695	5.19024e-06	0.00239571
NPPC	20.144	-2.14006	0.47313	-4.5232	6.09118e-06	0.00272371
TBC1D1	1938.98	-0.511012	0.113787	-4.49094	7.09107e-06	0.00307473
UBE2G1	2561.52	-0.426994	0.0981092	-4.35223	1.34759e-05	0.00567138
FBXO15	52.0417	2.40952	0.556254	4.33169	1.47967e-05	0.00604929
TRIM49D1	102.578	-1.5864	0.367092	-4.32155	1.54938e-05	0.00615837
PRKCA	340.361	-1.01261	0.235709	-4.29603	1.73886e-05	0.00672469
CRISPLD2	224.65	-0.858063	0.200989	-4.2692	1.96176e-05	0.00738705
PLPP1	6216.43	-0.620597	0.147105	-4.21872	2.45695e-05	0.00901448
IGFBP3	181.066	-0.968608	0.230916	-4.19463	2.73321e-05	0.00977739
SLC38A4	27.7928	-1.98441	0.474246	-4.18434	2.85995e-05	0.00988408
KLHL28	22.7513	-1.8159	0.434314	-4.18109	2.90119e-05	0.00988408
ORM1	11.7054	-2.50798	0.604647	-4.14785	3.35618e-05	0.0111683
KLK2	5487.06	-0.798876	0.193031	-4.1386	3.49435e-05	0.0113638
KLHL36	1162.13	-0.492376	0.12017	-4.09733	4.17942e-05	0.0132896
FZD5	504.423	-0.924868	0.229554	-4.02897	5.60209e-05	0.0174261
LRCH1	357.855	-0.829674	0.206336	-4.02099	5.79533e-05	0.0176437
SHROOM3	3383.07	-0.433544	0.108189	-4.00729	6.14206e-05	0.0183097
TBRG1	2141.77	-0.425478	0.108092	-3.93626	8.27597e-05	0.0241675
LDLRAD3	491.589	-0.580469	0.147714	-3.92967	8.50621e-05	0.0243431
CAMKK2	4904.91	-0.666655	0.16989	-3.92404	8.70761e-05	0.0244308
TBX15	39.7472	-1.33538	0.341584	-3.90938	9.25321e-05	0.0254623
RHOU	1211.69	-1.19969	0.309237	-3.87951	0.000104667	0.0282582
NDUFAF4	437.324	0.477076	0.123974	3.84821	0.000118986	0.0315291
TFEB	234.516	-0.742809	0.193336	-3.84207	0.000122	0.0317399
KLF5	82.1986	-1.41178	0.369348	-3.82237	0.000132177	0.0337736
SLC16A6	179.318	-1.14618	0.30101	-3.80779	0.000140215	0.035199
CDYL2	1728.72	-0.424568	0.112468	-3.775	0.000160007	0.0394749
HMGXB3	3768.34	-0.67402	0.179222	-3.76081	0.000169362	0.0408932
CHRNA2	328.253	-1.08333	0.288294	-3.75771	0.000171472	0.0408932
GRHL2	3137.49	-0.748317	0.20006	-3.74047	0.000183677	0.0427533
OTULINL	315.743	-1.23831	0.331247	-3.73833	0.000185247	0.0427533
ABCF1	104.435	-1.08712	0.291351	-3.73132	0.000190481	0.0432635
SNAI2	52.7802	-1.6667	0.447476	-3.72468	0.000195564	0.0437239
GRB10	6432.65	0.419639	0.112936	3.71574	0.000202614	0.0446031
GPRC5B	263.119	-0.537076	0.1474	-3.64366	0.000268789	0.0582743
SLC45A3	7555.6	-0.684979	0.188298	-3.63774	0.000275045	0.0587406
IL1RN	228.58	0.641075	0.177673	3.60817	0.000308359	0.0640098
SEMA6C	13.0148	-2.43779	0.675678	-3.60792	0.000308664	0.0640098
CAMK2N1	4185.88	0.311823	0.0868623	3.58985	0.000330865	0.0676334
NXF2B	8.91918	6.33863	1.78812	3.54485	0.000392836	0.0791702
TNFAIP3	63.9313	-1.233	0.35016	-3.52126	0.000429503	0.0851621
SOCS2	331.646	-0.695012	0.197547	-3.51821	0.00043447	0.0851621
ANKH	2895.2	-0.596465	0.169787	-3.51303	0.000443027	0.0856659
AKAP12	60.0333	-1.60377	0.459234	-3.49227	0.000478938	0.0901476
IFNGR2	36.9754	-1.76061	0.504347	-3.49088	0.00048144	0.0901476
OSR2	257.2	0.7203	0.206458	3.48885	0.000485105	0.0901476
PLA2G4E	8.61705	-2.64871	0.760635	-3.48224	0.000497239	0.0911041
GREB1	412.877	-0.703685	0.202257	-3.47916	0.000502986	0.0911041
PTPN9	1401.83	-0.299135	0.0862351	-3.46883	0.000522724	0.0934957
TLCD2	74.996	8.80348	2.5524	3.4491	0.000562454	0.0993599
NSMAF	758.252	-0.432458	0.126884	-3.4083	0.000653697	0.110732
ABCC1	1067.03	-0.586319	0.171704	-3.41471	0.000638508	0.110732
CSGALNACT1	169.241	-1.04621	0.306677	-3.41144	0.000646211	0.110732
MOGAT2	35.1149	-1.24193	0.364566	-3.4066	0.000657785	0.110732
KLHL29	215.766	-0.555353	0.163337	-3.40004	0.000673758	0.112102
KCNN2	2869.28	-0.363041	0.107325	-3.38262	0.00071797	0.117624
ZNF812P	65.5492	-1.05568	0.312279	-3.38056	0.000723387	0.117624
EFNA5	1578.25	-0.702024	0.209638	-3.34874	0.000811802	0.130518
LAMA1	42.479	-1.37809	0.415753	-3.31469	0.000917434	0.145862
ERN1	747.014	-0.675651	0.204091	-3.31054	0.000931151	0.146416
NBL1	8.19849	-2.40841	0.72894	-3.30399	0.000953199	0.148254
DLX1	32.5682	-1.35838	0.412104	-3.2962	0.000980015	0.150785
FZD8	80.3599	-0.818807	0.24898	-3.28865	0.0010067	0.153243
VLDLR	402.555	-0.545163	0.166211	-3.27995	0.00103825	0.156383
FAM110B	210.602	-0.612567	0.187127	-3.27354	0.0010621	0.158308
SP9	39.8254	-1.13873	0.351007	-3.24418	0.00117788	0.173755
KCNMA1	506.981	-0.478088	0.147529	-3.24064	0.00119264	0.174137
KIF22	249	-0.593606	0.185525	-3.19961	0.00137613	0.196866
SDC4	798.066	0.460733	0.144251	3.19396	0.00140334	0.196866
ACKR3	2486	0.519618	0.162426	3.1991	0.00137856	0.196866
C1orf116	8019.69	-0.545716	0.17073	-3.19636	0.00139173	0.196866
TMEM184C	265.459	0.497795	0.155993	3.19113	0.00141715	0.196874
PPFIBP2	838.203	-0.384627	0.12095	-3.18004	0.00147255	0.202603
PRR16	157.691	-0.493332	0.155474	-3.17309	0.00150828	0.205542
MYCL	220.839	-0.523168	0.168783	-3.09964	0.00193756	0.259107
USP43	566.09	-0.590029	0.190196	-3.10222	0.00192077	0.259107
TRIB2	15.3073	-2.1883	0.706731	-3.09637	0.00195909	0.259561
PRKY	54.9238	1.62122	0.524109	3.09329	0.00197953	0.259864
CEP76	16.7085	2.74991	0.892153	3.08233	0.00205384	0.267167
PHLDB2	10.1382	-2.38859	0.780061	-3.06206	0.00219821	0.283371
TCAF2	34.5263	-1.08054	0.356129	-3.03412	0.00241239	0.308204
TNFSF15	106.068	0.830109	0.275229	3.01606	0.00256081	0.324271
WIPF1	2.87483	4.18461	1.40185	2.98507	0.00283513	0.352764
AC068533.4	19.4189	-1.5159	0.507723	-2.98567	0.00282955	0.352764
LRRTM3	22.7943	1.96174	0.661407	2.96601	0.00301694	0.37215
PGC	16.2307	-1.54309	0.524378	-2.94271	0.00325355	0.381616
MICAL2	1497.91	-0.381245	0.129317	-2.94814	0.00319688	0.381616
ANKRD6	66.835	0.970891	0.328568	2.95491	0.00312756	0.381616
RAB15	207.848	-0.895231	0.304221	-2.94269	0.00325369	0.381616
GUSBP1	259.997	0.460385	0.156188	2.94764	0.0032021	0.381616
ARL4C	105.76	-0.552797	0.187789	-2.94371	0.00324306	0.381616
HSD17B7	775.257	0.315918	0.107656	2.93452	0.00334059	0.388622
ST3GAL1	8121.09	0.264685	0.0902899	2.9315	0.00337332	0.389265
RUNX1	37.3254	-1.73646	0.593664	-2.92498	0.00344477	0.39433
AC092718.8	24.8041	-1.22366	0.419378	-2.91779	0.00352527	0.400342
C1orf21	2711.99	-0.39119	0.134568	-2.907	0.00364917	0.408663
ABHD2	12274	-0.298537	0.102716	-2.90644	0.00365566	0.408663
MTMR7	4.33278	4.24298	1.47436	2.87785	0.00400396	0.444129
EPCAM	27.6226	-2.05743	0.715802	-2.87431	0.00404913	0.445685
IRS2	172.37	-0.880481	0.307103	-2.86705	0.00414317	0.452555
PIK3AP1	420.256	-0.758496	0.26522	-2.85988	0.00423803	0.459409
FBXO42	831.28	-0.354464	0.124117	-2.85588	0.00429177	0.461737
NEDD4L	4784.87	-0.255683	0.0899523	-2.84242	0.0044772	0.464233
PDZRN3	212.232	-0.63379	0.222786	-2.84484	0.00444337	0.464233
ZNF92	23.5484	3.67053	1.29103	2.84311	0.00446759	0.464233
F2RL1	735.574	-0.394919	0.138649	-2.84834	0.00439479	0.464233
MPZL1	3832.73	-0.358383	0.125768	-2.84957	0.00437789	0.464233
CBLL1	789.857	-0.518214	0.182783	-2.83514	0.00458062	0.47154
STXBP5L	170.024	0.921417	0.325819	2.828	0.00468392	0.47873
AL669918.1	243.413	-0.624528	0.222269	-2.80979	0.0049574	0.503088
DOP1B	1478.85	-0.269077	0.0960167	-2.8024	0.00507242	0.507561
PER1	707.572	-0.620435	0.221348	-2.80298	0.00506323	0.507561
WHRN	220.021	-0.543853	0.195136	-2.78704	0.00531913	0.527318
IL36G	16.2733	1.84434	0.662108	2.78556	0.00534357	0.527318
MYL12B	371.537	1.2417	0.448343	2.76953	0.00561377	0.537311
OCRL	1637.84	-0.230612	0.0831246	-2.77429	0.00553227	0.537311
RREB1	1348.39	-0.309062	0.111467	-2.77268	0.00555963	0.537311
SPIDR	724.946	0.382083	0.137953	2.76966	0.00561156	0.537311
TRIM68	2188.86	0.278699	0.10067	2.76844	0.00563258	0.537311
FMNL1	46.7943	0.734723	0.265831	2.76388	0.00571191	0.54127
TBC1D8	338.211	-0.49669	0.180629	-2.74979	0.00596342	0.561385
ZMIZ1	2879.75	-0.322418	0.117707	-2.73916	0.00615971	0.576074
FAM189A2	46.7759	-0.818568	0.300715	-2.72207	0.00648743	0.59186
TBC1D31	168.061	-0.524047	0.192541	-2.72174	0.00649395	0.59186
XDH	35.8658	0.97791	0.358942	2.72442	0.0064414	0.59186
CYP4F62P	3.51832	3.00907	1.10465	2.724	0.00644968	0.59186
SETBP1	807.757	-0.400623	0.14765	-2.71333	0.00666109	0.601945
OR51E1	319.941	0.810665	0.298923	2.71196	0.00668874	0.601945
ZC3H8	123.939	0.681261	0.251774	2.70584	0.00681317	0.60574
DYNLL2	6908.92	-0.216742	0.080105	-2.70572	0.00681558	0.60574
LYST	19.021	1.32238	0.492536	2.68484	0.00725642	0.637007
PLEKHM3	398.436	-0.409281	0.152369	-2.68611	0.0072289	0.637007
GRHL3	3.97295	-5.5052	2.05774	-2.67536	0.0074648	0.651304
TSC22D3	847.964	0.514488	0.193082	2.66462	0.00770765	0.668416
C1QTNF3-AMACR	35.4195	1.72932	0.649801	2.6613	0.00778394	0.670966
LRIG1	212.44	-0.856914	0.323272	-2.65075	0.00803123	0.679993
SDK1	28.6315	-1.55608	0.586437	-2.65344	0.00796752	0.679993
RALGAPA2	893.201	-0.320176	0.120755	-2.65146	0.00801435	0.679993
GLUL	4451.51	-0.402955	0.152201	-2.64751	0.0081086	0.682506
IL6R	973.734	-0.348626	0.132158	-2.63795	0.008341	0.693903
SLC25A33	2068.75	-0.216948	0.0822408	-2.63796	0.00834067	0.693903
HOXC13	322.74	0.356446	0.135663	2.62744	0.00860311	0.711571
FOXD4	62.482	-0.960439	0.366294	-2.62204	0.0087404	0.718772
ARHGEF3	23.5274	-3.44557	1.31858	-2.61309	0.00897289	0.733675
OPRK1	534.099	1.01436	0.389817	2.60214	0.00926445	0.746946
ELOVL7	411.851	-0.758334	0.291267	-2.60356	0.009226	0.746946
PET100	85.0084	-0.580158	0.223041	-2.60113	0.00929181	0.746946
CDK7	356.882	1.33667	0.514633	2.59732	0.00939543	0.751057
SUSD6	1375.72	0.338877	0.130812	2.59056	0.00958188	0.761706
NFKB1	1027.64	0.270231	0.104497	2.58602	0.00970917	0.76756
FHOD3	178.075	0.461243	0.179182	2.57415	0.0100486	0.781451
WNT7B	1452.08	-0.616909	0.239407	-2.57682	0.00997133	0.781451
TMEM120B	579.998	-0.446611	0.173498	-2.57415	0.0100487	0.781451
AC009690.1	3.42203	4.07591	1.58568	2.57045	0.0101565	0.785565
TPM1	1774.15	-0.244544	0.0954052	-2.56321	0.0103709	0.793565
SPSB1	137.305	-0.687446	0.268055	-2.56457	0.0103304	0.793565
SERPINE2	21.5389	2.16072	0.845655	2.55508	0.0106163	0.808021
MICAL1	295.491	-0.524067	0.206473	-2.53819	0.0111427	0.838728
S100A1	17.02	1.21763	0.4795	2.53937	0.0111052	0.838728
ACSM1	52.846	-0.634042	0.249964	-2.53654	0.0111956	0.838728
RRP15	424.057	0.337332	0.133569	2.52552	0.0115526	0.856511
RHOH	31.4277	0.978075	0.387107	2.52663	0.0115164	0.856511
PAK1IP1	418.991	-0.677294	0.268647	-2.52113	0.0116977	0.862799
LIFR	573.156	-0.643909	0.255736	-2.51787	0.0118068	0.866381
PNRC1	58.2447	-0.895046	0.355773	-2.51578	0.011877	0.867079
ACSL3	2268.47	-0.691408	0.275474	-2.50988	0.0120772	0.877218
EZR	2192.76	-0.248541	0.09933	-2.50218	0.0123432	0.88753
ESYT1	324.903	-1.06358	0.425056	-2.50221	0.0123422	0.88753
ZNF706	676.909	-0.260376	0.104366	-2.49484	0.0126012	0.895587
TGM3	216.788	0.709343	0.284431	2.4939	0.0126347	0.895587
AC026464.6	84.3888	-1.1581	0.464418	-2.49367	0.012643	0.895587
MBOAT2	2184.13	-0.574541	0.231198	-2.48506	0.0129529	0.913023
SLC22A23	1527.66	-0.287788	0.115906	-2.48294	0.0130302	0.913969
HERPUD1	2438.05	-0.414774	0.167685	-2.47354	0.0133782	0.933797
PACS1	2116.64	-0.522761	0.211635	-2.4701	0.0135074	0.938237
DDR2	60.5167	0.819748	0.3324	2.46615	0.0136576	0.941756
DFFB	43.6871	-1.46123	0.592719	-2.46531	0.0136896	0.941756
ERVMER34-1	125.964	0.475801	0.193233	2.46232	0.013804	0.945078
ADAMTS4	4.72417	3.9782	1.61833	2.45821	0.0139633	0.951432
ZNF385B	90.3629	-0.847877	0.346018	-2.45038	0.0142704	0.963184
AC005520.1	25.8308	1.40668	0.573976	2.45076	0.0142555	0.963184
ASTE1	17.1677	1.25152	0.511234	2.44803	0.014364	0.964951
NDRG1	102.698	-1.32211	0.541131	-2.44324	0.0145561	0.970777
LANCL1	182.217	-1.19944	0.491072	-2.44249	0.0145864	0.970777
NAGK	506.052	-0.50036	0.205459	-2.43533	0.0148784	0.985623
IRF9	19.0983	1.6038	0.659751	2.43092	0.0150606	0.993096
LRRFIP2	1448.03	-0.486813	0.200529	-2.42764	0.0151973	0.993515
ATXN2	1181.33	-0.29451	0.121325	-2.42744	0.0152058	0.993515
TSPAN6	11.238	-1.08141	0.970952	-1.11376	0.265383	1
DPM1	26.3293	0.65216	0.644773	1.01146	0.311797	1
SCYL3	177.712	0.105287	0.251235	0.419077	0.67516	1
C1orf112	295.257	-0.0857474	0.170743	-0.502202	0.615525	1
GCLC	363.605	-0.155173	0.270906	-0.572792	0.566785	1
NFYA	942.151	0.114844	0.237327	0.483907	0.628452	1
STPG1	233.096	-0.154668	0.130667	-1.18368	0.236539	1
NIPAL3	1580.7	0.0128363	0.0960809	0.133598	0.89372	1
LAS1L	1402.22	-0.107662	0.131139	-0.820974	0.411661	1
ENPP4	316.354	0.0339667	0.421684	0.08055	0.9358	1
SEMA3F	467.84	-0.0924505	0.259036	-0.356902	0.721165	1
ANKIB1	672.276	0.0963254	0.385186	0.250075	0.80253	1
CYP51A1	2004.49	0.00499864	0.237423	0.0210537	0.983203	1
KRIT1	144.793	0.442491	0.616646	0.717578	0.473018	1
RAD52	88.7181	0.212861	0.281242	0.756862	0.449133	1
BAD	150.008	-0.121825	0.304966	-0.399472	0.689545	1
LAP3	1878.63	0.0441761	0.152331	0.29	0.771816	1
CD99	6390.46	-0.0908328	0.249591	-0.363927	0.715913	1
HS3ST1	202.03	-0.705262	0.309469	-2.27894	0.0226706	1
MAD1L1	594.516	0.0742173	0.260861	0.284509	0.776021	1
LASP1	4466.74	0.0955217	0.167243	0.571156	0.567894	1
SNX11	122.564	0.204236	0.318594	0.641055	0.521487	1
M6PR	2067.75	0.0336372	0.0937902	0.358643	0.719862	1
KLHL13	121.113	0.0156451	0.25323	0.0617821	0.950736	1
CYP26B1	2.875	1.0492	1.65085	0.635553	0.525068	1
ICA1	1246.76	0.0837809	0.128305	0.652982	0.513768	1
DBNDD1	66.0554	0.0701825	0.347507	0.20196	0.839948	1
ALS2	406.868	-0.0414825	0.249878	-0.166011	0.868148	1
CASP10	18.3631	0.0594434	0.663571	0.0895812	0.92862	1
CFLAR	580.451	-0.131353	0.193145	-0.680079	0.496455	1
TFPI	2092.73	-0.0836736	0.14472	-0.578175	0.563146	1
NDUFAF7	144.962	0.0222516	0.2605	0.0854189	0.931928	1
RBM5	310.413	0.31155	0.496442	0.627567	0.530288	1
SLC7A2	19.983	-0.0970075	1.40104	-0.0692395	0.944799	1
ARF5	3899.74	-0.0448555	0.236751	-0.189463	0.84973	1
SARM1	1366.81	-0.164	0.246759	-0.664614	0.506297	1
POLDIP2	6152.22	-0.0571191	0.20474	-0.278983	0.780258	1
PLXND1	3.97833	-3.15262	1.65911	-1.90019	0.0574085	1
AK2	629.11	-0.0460743	0.195907	-0.235185	0.814065	1
CD38	4.4365	-0.04001	1.08867	-0.0367512	0.970683	1
FKBP4	13527	-0.0443262	0.250743	-0.17678	0.859681	1
KDM1A	2010.95	-0.0472565	0.118234	-0.399687	0.689387	1
RBM6	685.358	0.144112	0.207461	0.694645	0.487278	1
RECQL	227.822	0.095711	0.459893	0.208116	0.835139	1
VPS50	139.196	0.0537443	0.395013	0.136057	0.891776	1
HSPB6	10.4779	0.773013	0.621097	1.24459	0.213281	1
ARHGAP33	271.695	-0.0354479	0.241368	-0.146863	0.883241	1
NDUFAB1	2583.03	-0.0215466	0.100251	-0.214926	0.829825	1
SLC22A16	2.83818	1.24611	1.19026	1.04692	0.295138	1
ZMYND10	145.048	-0.164206	0.286055	-0.574038	0.565942	1
ARX	50.1155	0.07987	0.291102	0.274371	0.783799	1
SLC25A13	27.6404	-0.715685	0.723574	-0.989097	0.322616	1
ST7	2799.43	0.0821709	0.112108	0.732964	0.463581	1
CDC27	1339.7	0.32208	0.314228	1.02499	0.305368	1
HCCS	528.919	0.0368757	0.134619	0.273926	0.784141	1
DVL2	1491.1	-0.100091	0.160178	-0.624875	0.532053	1
UPF1	396.776	-0.214327	0.281846	-0.760439	0.446992	1
SKAP2	1069.4	0.0998664	0.335908	0.297303	0.766235	1
SLC25A5	12856.5	-0.0406861	0.215546	-0.188758	0.850282	1
MCUB	31.345	-0.0928406	0.534852	-0.173582	0.862194	1
POLR2J	1276.63	-0.0818315	0.208546	-0.39239	0.69477	1
DHX33	818.766	0.0351276	0.202119	0.173797	0.862025	1
THSD7A	9.04507	-0.414329	0.899824	-0.460455	0.64519	1
LIG3	644.534	-0.0521524	0.178981	-0.291385	0.770757	1
RPAP3	355.239	0.0445578	0.300528	0.148265	0.882133	1
ACSM3	453.194	0.218917	0.28582	0.765923	0.443722	1
REXO5	367.939	-0.242232	0.241529	-1.00291	0.315904	1
CIAPIN1	1700.37	-0.0327553	0.186849	-0.175303	0.860841	1
SPPL2B	858.195	0.0111386	0.256786	0.0433769	0.965401	1
FAM214B	313.717	-0.277809	0.312887	-0.887888	0.374601	1
PRKAR2B	398.582	-0.0546744	0.392632	-0.139251	0.889252	1
MSL3	202.581	0.259761	0.419004	0.619949	0.535292	1
CREBBP	547.47	-0.263214	0.162971	-1.6151	0.106289	1
TSPOAP1	78.0693	-0.106466	0.427835	-0.248849	0.803478	1
GCFC2	227.46	0.11633	0.281559	0.413164	0.679487	1
WDR54	570.94	0.0445399	0.27821	0.160095	0.872807	1
CROT	51.3303	-0.0825497	0.445899	-0.185131	0.853126	1
ABCB4	2.96077	1.07796	1.24233	0.867692	0.385563	1
KMT2E	670.789	0.131043	0.390611	0.335482	0.737262	1
RHBDD2	2451.45	-0.0153835	0.261256	-0.058883	0.953045	1
SOX8	199.929	-0.0399493	0.240859	-0.165861	0.868266	1
IBTK	1000.36	0.0821618	0.446253	0.184115	0.853923	1
ZNF195	256.224	0.0492929	0.438747	0.112349	0.910546	1
MYCBP2	2474.95	-0.0312801	0.429034	-0.0729082	0.941879	1
FBXL3	523.031	-0.124118	0.470237	-0.263947	0.791821	1
PDK2	716.119	0.00116311	0.288239	0.00403522	0.99678	1
ITGA3	258.781	0.0576123	0.268276	0.21475	0.829962	1
ZFX	265.109	-0.0210412	0.381437	-0.0551628	0.956009	1
LAMP2	2613.19	0.130586	0.303131	0.43079	0.666621	1
ITGA2B	5.49804	-1.17545	1.5754	-0.746128	0.45559	1
GDE1	2828.63	0.0508479	0.136236	0.373235	0.708974	1
REX1BD	591.199	-0.0268382	0.219756	-0.122127	0.902798	1
CRLF1	44.798	0.26084	0.384395	0.678573	0.497408	1
OSBPL7	5.80982	-0.506586	0.722325	-0.701328	0.483099	1
TMEM98	1740.99	-0.122594	0.19582	-0.626054	0.53128	1
YBX2	18.6827	0.344679	0.529674	0.650738	0.515215	1
MAP3K14	266.619	0.326807	0.214329	1.52479	0.12731	1
ABCC8	33.2157	0.955363	0.506214	1.88727	0.0591238	1
TMEM132A	3716.56	0.0225171	0.2317	0.0971822	0.922582	1
AP2B1	11799.7	-0.0645347	0.155567	-0.414835	0.678262	1
ZNF263	1205.72	0.0246352	0.103094	0.238959	0.811137	1
SPATA20	4412.92	0.0151152	0.235723	0.0641228	0.948872	1
CACNA1G	17.0297	0.550466	0.500286	1.1003	0.2712	1
TNFRSF12A	16.5289	0.0811686	0.61642	0.131677	0.895239	1
MAP3K9	631.551	-0.181987	0.123128	-1.47803	0.139399	1
RALA	932.941	0.124415	0.304204	0.408987	0.682549	1
BAIAP2L1	2153.61	-0.0493504	0.138604	-0.356054	0.7218	1
KDM7A	250.234	-0.271451	0.366107	-0.741451	0.45842	1
ETV1	5208.75	-0.00836959	0.236636	-0.0353691	0.971785	1
AGK	1198.74	0.0138758	0.119273	0.116337	0.907385	1
ALDH3B1	44.2347	-0.443785	0.351446	-1.26274	0.206682	1
PHTF2	462.928	0.14743	0.400809	0.367832	0.712998	1
FARP2	1402.5	-0.09895	0.126577	-0.781739	0.434368	1
GGCT	1406.15	0.211289	0.236034	0.895164	0.370699	1
DBF4	231.148	0.132653	0.373222	0.355427	0.72227	1
IFRD1	264.271	0.362677	0.419069	0.865434	0.386801	1
COX10	410.453	0.0288393	0.113268	0.254612	0.799023	1
GTF2IRD1	619.13	0.0238451	0.138361	0.17234	0.86317	1
PAF1	1874.9	-0.085679	0.159296	-0.537862	0.590672	1
VPS41	996.088	-0.0582201	0.19402	-0.300073	0.764121	1
ARHGAP44	629.765	0.00226985	0.100893	0.0224976	0.982051	1
ELAC2	3241.82	-0.0366285	0.148292	-0.247003	0.804906	1
SCIN	4.76499	0.677996	1.01415	0.668539	0.50379	1
ARSD	2365.85	-0.00994372	0.17012	-0.0584513	0.953389	1
PNPLA4	1037.34	-0.0683907	0.254218	-0.269024	0.787912	1
ADIPOR2	1880.49	0.0205343	0.0755514	0.271793	0.785781	1
CDKL3	18.4563	0.48207	0.618305	0.779664	0.435589	1
MARK4	475.588	-0.0582033	0.317972	-0.183045	0.854762	1
CCDC124	1922.28	-0.0493198	0.230759	-0.213728	0.830759	1
PAFAH1B1	2540.07	0.00227835	0.194307	0.0117255	0.990645	1
DNAH9	13.6223	0.333748	0.549404	0.607472	0.543538	1
KIAA0100	11670.1	-0.0573991	0.197585	-0.290503	0.771432	1
GAS7	5.44324	-0.0170838	1.21263	-0.0140883	0.98876	1
TRAPPC6A	493.143	-0.012735	0.278099	-0.0457929	0.963475	1
ST7L	658.563	-0.072351	0.166024	-0.435787	0.662991	1
TKTL1	4.11136	-0.664874	1.28547	-0.517222	0.605001	1
RPUSD1	980.192	0.0422376	0.226202	0.186725	0.851876	1
RHBDF1	905.704	-0.147804	0.201521	-0.733442	0.463289	1
LUC7L	184.045	0.106624	0.442577	0.240915	0.809621	1
CACNA2D2	144.479	0.0923333	0.228179	0.404654	0.685732	1
BAIAP3	244.784	-0.0122637	0.359814	-0.0340835	0.972811	1
TSR3	1047.36	0.00625696	0.196164	0.0318965	0.974555	1
PIGQ	365.929	-0.172371	0.301147	-0.57238	0.567064	1
CRAMP1	356.333	-0.0796424	0.429037	-0.185631	0.852734	1
TEAD3	445.186	-0.200156	0.147987	-1.35252	0.176209	1
DNAJC11	2161.43	-0.0588034	0.169837	-0.346235	0.729166	1
MYLIP	278.531	0.237483	0.14299	1.66084	0.096746	1
NOX1	6.3446	0.461807	0.817871	0.564646	0.572315	1
E2F2	121.783	-0.0664625	0.262135	-0.253543	0.799848	1
PSMB1	3789.62	-0.00112868	0.113303	-0.00996161	0.992052	1
JARID2	576.515	-0.0568337	0.141347	-0.402087	0.68762	1
CDKL5	7.84753	0.429855	1.21679	0.35327	0.723886	1
CDK11A	220.691	0.248258	0.36667	0.677062	0.498366	1
NADK	2319.99	-0.0427489	0.118091	-0.362	0.717352	1
DLEC1	2.74752	0.603825	1.32541	0.455577	0.648694	1
CYTH3	1847.65	0.237362	0.122501	1.93763	0.0526683	1
ADAM22	213.716	-0.0648198	0.333539	-0.19434	0.84591	1
SYPL1	1996.86	0.0628186	0.153869	0.40826	0.683083	1
CYB561	5846.21	-0.073597	0.129075	-0.570187	0.568551	1
SPAG9	912.315	-0.029245	0.344707	-0.0848402	0.932388	1
CELSR3	132.433	0.145395	0.297034	0.489488	0.624496	1
AASS	228.481	-0.223194	0.239628	-0.931416	0.351638	1
PLEKHG6	24.9415	0.168275	0.491259	0.342539	0.731945	1
SS18L2	7.2178	0.00332774	0.883997	0.00376443	0.996996	1
MPND	149.705	0.131706	0.344641	0.382155	0.702346	1
MGST1	2920.9	0.0401562	0.1276	0.314704	0.752986	1
CRY1	374.677	0.225647	0.39406	0.572622	0.566901	1
NFIX	18768.4	-0.017224	0.223671	-0.077006	0.938619	1
MMP25	20.477	0.0271922	0.45177	0.0601904	0.952004	1
IL32	51.225	-0.209055	0.537353	-0.389047	0.697242	1
PKD1	417.664	-0.0467889	0.271768	-0.172165	0.863308	1
MAPK8IP2	481.09	-0.0515601	0.262674	-0.196289	0.844384	1
MED24	2200.13	-0.0645553	0.166256	-0.388289	0.697802	1
RHOBTB2	569.679	-0.559925	0.296043	-1.89136	0.0585759	1
HEATR5B	776.048	0.0303152	0.218042	0.139034	0.889423	1
SEC62	1169.72	0.317486	0.420604	0.754834	0.450349	1
RPS20	183.9	0.0307553	0.267693	0.11489	0.908532	1
CSDE1	17590.9	0.0600202	0.187742	0.319695	0.7492	1
UBE3C	3472.52	0.00318883	0.154445	0.0206471	0.983527	1
REV3L	34.1911	-1.29742	1.92742	-0.67314	0.500858	1
TENM1	25.7538	0.286132	0.541407	0.528497	0.597155	1
IYD	70.4463	0.373792	0.446435	0.837282	0.402434	1
FAM76A	58.4724	0.675028	0.381684	1.76855	0.0769682	1
TRAF3IP3	3.73427	1.50469	1.03596	1.45246	0.146374	1
POMT2	109.65	0.525271	0.367424	1.42961	0.15283	1
VTA1	2296.02	0.172772	0.296641	0.582429	0.560278	1
MLXIPL	35.6744	0.0383261	0.427215	0.0897114	0.928517	1
BAZ1B	2921.6	0.04895	0.247034	0.198151	0.842927	1
RANBP9	1098.71	0.0648422	0.253009	0.256284	0.797732	1
SPRTN	245.621	-0.0129738	0.337272	-0.0384668	0.969315	1
EEF1AKNMT	1483.09	0.0514083	0.119399	0.43056	0.666788	1
DYRK4	343.118	-0.0197635	0.134865	-0.146543	0.883493	1
ZNF207	6025.03	-0.0142811	0.101315	-0.140958	0.887903	1
UQCRC1	6886.33	-0.00188642	0.30842	-0.00611639	0.99512	1
STARD3NL	669.43	-0.0539652	0.171446	-0.314765	0.75294	1
CD9	7587.84	-0.0329846	0.112841	-0.292312	0.770048	1
NCAPD2	3368.13	-0.0500896	0.172075	-0.291091	0.770982	1
PHF7	157.486	0.0653578	0.193397	0.337946	0.735404	1
NISCH	2039.97	-0.0501721	0.11993	-0.418345	0.675695	1
STAB1	8.43474	-0.363727	0.883406	-0.411733	0.680535	1
FUZ	163.298	-0.151643	0.277411	-0.546638	0.584627	1
IDS	1187.97	-0.0478224	0.16355	-0.292403	0.769979	1
PRSS3	26.2015	0.344015	0.465576	0.738901	0.459967	1
ZNF200	169.819	0.343947	0.277317	1.24027	0.214875	1
CD4	10.982	-0.635833	0.716826	-0.887012	0.375073	1
LRRC23	233.022	-0.089437	0.209524	-0.426858	0.669482	1
HFE	140.318	0.290241	0.2288	1.26854	0.204606	1
SCMH1	2538.49	-0.10854	0.179692	-0.604033	0.545822	1
FYN	43.1409	0.655733	0.496957	1.3195	0.187003	1
HIVEP2	667.195	-0.0503463	0.373649	-0.134742	0.892815	1
ELOA	1744.65	-0.0290788	0.125429	-0.231834	0.816667	1
LYPLA2	939.545	-0.143519	0.176318	-0.813978	0.415658	1
CLCN6	302.054	0.0446426	0.200325	0.222851	0.823651	1
MRC2	3.74519	0.745802	1.15907	0.643446	0.519935	1
NME1-NME2	158.96	-0.269783	0.374961	-0.719496	0.471835	1
TSPAN9	1190.25	0.166846	0.184193	0.905823	0.36503	1
APBA3	219.746	0.0128213	0.286081	0.0448172	0.964253	1
MKS1	231.357	0.0481015	0.169318	0.28409	0.776341	1
ABHD5	623.24	-0.0348032	0.130708	-0.266266	0.790034	1
ANOS1	9.86826	-0.334478	0.928853	-0.360098	0.718774	1
AKAP8L	1141.03	-0.0679118	0.164416	-0.413049	0.67957	1
MBTD1	272.862	0.261109	0.412095	0.633615	0.526332	1
UTP18	1033.06	-0.0374399	0.17833	-0.209947	0.833709	1
RNF216	1011.8	-0.0047651	0.128439	-0.0371001	0.970405	1
TTC19	1745.51	0.0861429	0.185734	0.463796	0.642794	1
PTBP1	10045.8	-0.0982939	0.193483	-0.508022	0.611438	1
DPF1	121.348	-0.000709073	0.239172	-0.0029647	0.997635	1
SYT7	1162.84	0.0117474	0.204228	0.0575211	0.95413	1
LARS2	2262.53	-0.0564852	0.103278	-0.546922	0.584432	1
PIK3C2A	499.549	0.292157	0.499477	0.584925	0.558598	1
PLAUR	6.64391	0.130228	0.831773	0.156567	0.875586	1
ANLN	678.162	-0.161683	0.357674	-0.452039	0.651241	1
WIZ	928.788	-0.209059	0.187489	-1.11505	0.26483	1
RABGAP1	1273	0.0670738	0.3024	0.221805	0.824466	1
QPCTL	209.737	-0.121326	0.267349	-0.453812	0.649964	1
PPP5C	114.074	0.07743	0.397363	0.194859	0.845503	1
CEP68	319.488	0.0693152	0.134571	0.515084	0.606495	1
MAP4K3	202.209	0.387839	0.450081	0.861711	0.388847	1
ZBTB32	17.7949	0.558336	0.592442	0.942431	0.345972	1
TMEM159	458.404	0.0863255	0.154006	0.560533	0.575116	1
GABRA3	182.98	-0.153042	0.219526	-0.69715	0.485709	1
BRCA1	95.6179	-0.309245	0.551039	-0.561204	0.574659	1
ERCC1	1053.78	0.070488	0.266488	0.264507	0.791389	1
SEMA3B	222.392	0.19738	0.313384	0.629833	0.528804	1
MBTPS2	918.899	-0.208613	0.311795	-0.669073	0.503449	1
PRICKLE3	299.826	-0.249386	0.186055	-1.34039	0.180118	1
LTF	29.78	0.227289	0.397017	0.572494	0.566988	1
EXTL3	15.342	0.839148	1.21257	0.69204	0.488912	1
ELOVL5	6334.71	-0.132511	0.174552	-0.75915	0.447763	1
KDM5D	81.3222	1.00262	0.618684	1.62057	0.105111	1
CALCOCO1	599.505	-0.0254351	0.215867	-0.117828	0.906204	1
UBR7	1405.6	0.00363708	0.111426	0.0326412	0.973961	1
MAP4K5	238.702	0.211717	0.283336	0.74723	0.454925	1
EHD3	404.372	-0.0116107	0.11721	-0.0990598	0.921091	1
PSMC4	326.739	-0.967827	0.421298	-2.29725	0.0216044	1
MAN2B2	206.655	-0.146605	0.466259	-0.314429	0.753195	1
SLC25A39	5471.47	-0.0553325	0.242858	-0.227839	0.819771	1
MVP	383.518	-0.074033	0.302942	-0.24438	0.806936	1
NUB1	1175.5	-0.0215037	0.109099	-0.197103	0.843747	1
PGM3	1126.49	0.0764705	0.270491	0.28271	0.777399	1
RWDD2A	765.436	0.262346	0.209986	1.24935	0.211536	1
CLK1	255.521	0.169828	0.463112	0.36671	0.713835	1
POLR3B	721.304	0.0212548	0.238451	0.0891372	0.928973	1
ANGEL1	40.7119	-0.229343	0.386913	-0.592752	0.553347	1
RNF14	1530.41	-0.0356027	0.121732	-0.292469	0.769928	1
DNASE1L1	911.77	-0.0118006	0.197882	-0.0596347	0.952447	1
DDX11	556.088	0.0264919	0.120553	0.219753	0.826064	1
HEBP1	831.868	-0.0203663	0.189164	-0.107665	0.914262	1
MAMLD1	11.869	0.551382	0.524149	1.05196	0.29282	1
TACC3	2022.39	-0.0510574	0.135263	-0.377467	0.705826	1
UFL1	612.029	0.190388	0.421682	0.451496	0.651632	1
POLA2	567.983	0.0328138	0.214971	0.152643	0.87868	1
ZC3H3	605.285	-0.0464812	0.254399	-0.18271	0.855026	1
CAPN1	704.589	-0.317476	0.423413	-0.749802	0.453374	1
ACP3	4856.93	0.103984	0.100694	1.03268	0.301756	1
MDH1	1864.36	0.0462507	0.162277	0.285011	0.775636	1
SLC30A9	1896.1	0.103612	0.364486	0.284269	0.776204	1
MTMR11	29.9177	0.0210811	0.502653	0.0419396	0.966547	1
COX15	414.327	0.00386844	0.129468	0.0298795	0.976163	1
CCDC88C	835.294	0.0594705	0.148849	0.399536	0.689499	1
YAF2	55.1493	0.149061	0.400157	0.372506	0.709516	1
ZMYND11	1632.5	0.0125905	0.307567	0.0409358	0.967347	1
WAS	2.89243	1.06056	1.44323	0.734848	0.462432	1
BID	151.454	0.152848	0.274396	0.557034	0.577504	1
MATR3	1750.82	0.146956	0.775042	0.18961	0.849615	1
NPC1L1	4.29739	2.3239	1.24536	1.86605	0.0620344	1
XYLT2	43.0747	0.142539	0.384272	0.370932	0.710688	1
RGPD5	170.068	-0.33199	1.41206	-0.235111	0.814123	1
STMN4	5.15839	-0.214229	0.783207	-0.273528	0.784447	1
NUDCD3	2822.23	-0.0721143	0.26823	-0.268853	0.788043	1
ISL1	3.01079	-0.846834	1.15402	-0.733815	0.463062	1
CHDH	709.999	0.311368	0.200625	1.55199	0.120664	1
IL20RA	16.6585	0.0564531	0.699075	0.0807541	0.935638	1
GLT8D1	767.981	0.0137485	0.147381	0.0932855	0.925677	1
ATP2C1	2093.24	-0.103445	0.195801	-0.528319	0.597278	1
IGF1	2.91896	-0.825962	1.39354	-0.592707	0.553377	1
RALBP1	1680.26	-0.10737	0.249572	-0.430217	0.667038	1
RUFY3	204.849	-0.029476	0.257414	-0.114508	0.908835	1
SLC11A1	95.3454	0.204321	0.290909	0.702355	0.482458	1
WWTR1	26.9586	-0.933026	0.707861	-1.31809	0.187473	1
AGPS	107.016	0.200591	0.563996	0.355661	0.722095	1
CXorf56	422.779	-0.00135821	0.105518	-0.0128718	0.98973	1
TTC27	535.828	-0.0400452	0.123469	-0.324334	0.745685	1
ZNF582	83.2297	0.236953	0.418745	0.565863	0.571487	1
PHLDB1	658.691	-0.0604617	0.186796	-0.323678	0.746182	1
PRDM11	92.5209	-0.347798	0.229982	-1.51228	0.130462	1
SYT13	6.95212	-0.410892	0.76789	-0.535092	0.592586	1
ZRANB1	424.324	-0.083889	0.203403	-0.412428	0.680026	1
NCDN	1695.68	-0.0495618	0.20511	-0.241636	0.809062	1
ZFP64	578.843	0.0130578	0.173422	0.0752951	0.93998	1
MNAT1	252.208	0.106579	0.344559	0.309319	0.757079	1
SAMD4A	18.6721	0.163609	0.74603	0.219305	0.826412	1
MRE11	148.851	0.0535853	0.431492	0.124186	0.901168	1
PLEKHB1	6587.24	0.0301411	0.271072	0.111192	0.911464	1
SPAST	79.442	1.35459	0.919262	1.47356	0.140601	1
OSBPL5	1168.28	0.00674643	0.220166	0.0306424	0.975555	1
AQR	1392.34	-0.0262778	0.166701	-0.157635	0.874745	1
RTF2	1991.99	-0.0528404	0.100193	-0.527386	0.597926	1
NLRP2	1361.99	0.000820344	0.243831	0.00336439	0.997316	1
SLC45A4	246.807	-0.0884205	0.181481	-0.487215	0.626106	1
RNF10	6430.35	0.0338371	0.207853	0.162794	0.870681	1
ZNF839	398.2	-0.042298	0.116025	-0.36456	0.71544	1
ZDHHC6	553.121	-0.147176	0.16006	-0.919506	0.357831	1
RNH1	50.9727	0.0189402	2.5663	0.00738035	0.994111	1
NDUFS1	3513.05	0.00730325	0.126609	0.0576837	0.954001	1
RB1CC1	421.698	0.232939	0.568358	0.409846	0.681919	1
ERP44	1431.26	-0.0294606	0.153459	-0.191976	0.847761	1
ALAS1	2469.96	-0.037313	0.186771	-0.19978	0.841653	1
AKAP11	640.686	0.0352754	0.401428	0.0878746	0.929976	1
GLRX2	199.483	0.0961793	0.435436	0.220881	0.825185	1
SNAPC1	113.671	0.321902	0.370287	0.869331	0.384666	1
DERA	546.859	-0.141001	0.112693	-1.25119	0.210863	1
STRAP	4275.73	0.00812351	0.14632	0.0555188	0.955725	1
DEF6	282.528	-0.0181838	0.139218	-0.130614	0.896081	1
PLEKHO1	78.3985	-0.204556	0.228788	-0.894083	0.371277	1
GCLM	657.563	0.114698	0.181569	0.631706	0.527579	1
UBR2	740.674	0.120912	0.288679	0.418846	0.675329	1
DEPDC1	315.87	0.264605	0.468017	0.565375	0.571819	1
CCDC28A	167.997	0.13334	0.185922	0.717184	0.47326	1
RRAGD	109.124	-0.0385939	0.223445	-0.172722	0.86287	1
HSF2	201.109	-0.0577584	0.302495	-0.19094	0.848573	1
PHF20	1360.41	0.07673	0.139451	0.550228	0.582163	1
HSD17B6	20.0785	-0.0750447	0.548109	-0.136916	0.891097	1
NR1H3	347.993	0.0448501	0.25785	0.173939	0.861914	1
TYMP	298.318	-0.0873541	0.281142	-0.310712	0.75602	1
NCAPH2	785.24	-0.0789072	0.256323	-0.307843	0.758202	1
TOMM34	2266.08	-0.0197817	0.139318	-0.141989	0.887088	1
SEC63	2794.21	-0.145058	0.256648	-0.565202	0.571937	1
KPNA6	1994.7	-0.0337035	0.101646	-0.331577	0.740209	1
VIM	215.706	-0.0797377	0.238489	-0.334345	0.738119	1
RTEL1-TNFRSF6B	61.3821	-0.132844	0.384138	-0.345823	0.729476	1
FAS	39.9792	0.521576	0.412133	1.26555	0.205674	1
RNASET2	53.1803	0.160234	1.0283	0.155824	0.876172	1
KCNG1	272.652	0.149063	0.220123	0.677182	0.49829	1
BTN3A1	179.836	0.0912854	0.180212	0.506545	0.612474	1
MIPEP	855.401	-0.0870412	0.210209	-0.41407	0.678823	1
PRKCH	260.238	0.27793	0.226109	1.22919	0.219002	1
IFNGR1	5.67448	0.586097	0.786307	0.74538	0.456042	1
B4GALT7	681.31	-0.0406286	0.186305	-0.218076	0.82737	1
VRK2	23.8852	-0.503507	0.621457	-0.810203	0.417823	1
TNFRSF1B	4.95539	-1.42236	1.19004	-1.19522	0.232	1
VEZT	1209.49	0.0968813	0.301789	0.321023	0.748193	1
POU2F2	4.20679	0.0596318	1.25357	0.0475697	0.962059	1
BRD9	677.182	-0.0709303	0.130959	-0.541621	0.588079	1
SNX1	2880.4	0.069996	0.16782	0.41709	0.676613	1
TBPL1	686.224	0.070636	0.166344	0.424639	0.6711	1
ARNTL2	194.964	0.151536	0.378516	0.400343	0.688904	1
BCLAF1	2722.9	0.190677	0.341421	0.55848	0.576517	1
SLC39A9	2737.48	0.0305291	0.162566	0.187794	0.851038	1
ANK1	20.2108	0.224868	0.5567	0.403931	0.686264	1
TFB1M	212.642	0.304627	0.176978	1.72127	0.0852023	1
RABEP1	1050.49	0.00548479	0.301326	0.0182022	0.985478	1
HMGB3	1315.3	0.0073688	0.163668	0.0450229	0.964089	1
NUP160	1153.41	0.0654022	0.164329	0.397996	0.690633	1
BAK1	855.603	-0.0951812	0.234154	-0.40649	0.684383	1
IKZF2	42.1695	0.213306	0.504321	0.422958	0.672326	1
GRN	2151.41	-0.0687704	0.275412	-0.249701	0.802819	1
FAM13B	1117.98	0.0843482	0.43631	0.193322	0.846707	1
CENPQ	44.4779	-0.212763	0.660154	-0.322293	0.74723	1
SARS1	6391.34	0.0554033	0.179787	0.308161	0.75796	1
RANBP3	1677.38	-0.00546434	0.167385	-0.0326453	0.973957	1
ARID4A	6.01432	-0.456628	1.23332	-0.370242	0.711202	1
EIPR1	36.7296	0.0269959	0.701456	0.0384855	0.969301	1
PNPLA6	979.035	-0.0494381	0.24953	-0.198125	0.842948	1
IFT88	184.012	0.172288	0.27025	0.637513	0.523791	1
ALG1	105.485	-1.0737	0.468045	-2.294	0.0217903	1
ZCCHC8	35.9163	-0.104676	0.68283	-0.153298	0.878164	1
ABCF2	1457.69	-0.0490772	0.248664	-0.197363	0.843543	1
CHPF2	1360.08	-0.204277	0.174594	-1.17002	0.241994	1
LRRC7	25.8695	0.85533	0.465548	1.83725	0.0661725	1
FUT8	346.029	0.272146	0.288819	0.94227	0.346055	1
UBA6	557.332	0.33839	0.446144	0.758477	0.448165	1
GAB2	69.0558	-0.322395	0.286127	-1.12676	0.259846	1
ATP6V0A1	1660.94	0.0809774	0.272283	0.297401	0.76616	1
PIAS1	225.455	-0.400033	0.271576	-1.473	0.14075	1
SLC4A7	355.198	0.138031	0.525247	0.262793	0.79271	1
APBA2	283.27	0.0962505	0.275474	0.349399	0.72679	1
MAP2K3	797.534	0.185704	0.22613	0.82123	0.411515	1
TMSB10	1122.38	-0.0539459	0.203274	-0.265385	0.790713	1
RNF19A	454.254	-0.165059	0.38202	-0.432068	0.665692	1
PEX3	362.119	0.00278047	0.227467	0.0122236	0.990247	1
GABARAPL2	2150.03	0.00588247	0.0864752	0.0680249	0.945766	1
SH3YL1	127.765	0.217473	0.294125	0.73939	0.459671	1
FAM136A	1008.8	-0.0692035	0.100496	-0.688616	0.491065	1
VCL	592.867	-0.290153	0.153263	-1.89317	0.0583349	1
DEPDC1B	269.674	-0.0115724	0.348703	-0.033187	0.973525	1
DAPK2	125.275	-0.170586	0.277042	-0.61574	0.538066	1
ADSS2	562.669	0.0606552	0.303207	0.200046	0.841445	1
TIMP2	1753.02	0.0098145	0.206948	0.047425	0.962175	1
RFC1	1258.7	0.134761	0.447369	0.301231	0.763239	1
TBC1D23	249.445	0.222312	0.358382	0.620322	0.535046	1
CUL3	1342.06	0.0501165	0.261021	0.192002	0.847741	1
MYOM2	30.7737	0.120391	0.392504	0.306726	0.759052	1
CYP46A1	7.52606	-0.499162	1.2277	-0.406582	0.684315	1
ZZZ3	575.377	0.258296	0.368698	0.700562	0.483576	1
USP2	151.546	0.0881993	0.251084	0.351274	0.725383	1
TUBG2	337.419	-0.00393976	0.148187	-0.0265865	0.97879	1
RPL26L1	799.95	0.0582057	0.164291	0.354283	0.723126	1
FLT4	54.5187	-0.482883	0.580898	-0.831269	0.405822	1
NSUN2	2183.79	-0.0662536	0.119227	-0.555694	0.57842	1
MFAP3	511.649	-0.0222461	0.317484	-0.0700701	0.944138	1
MRI1	393.367	-0.197131	0.127543	-1.54561	0.122199	1
METTL1	545.548	0.0520689	0.257672	0.202074	0.839859	1
AGA	839.653	0.0528452	0.118743	0.445038	0.656292	1
PI4K2B	300.286	0.258499	0.441657	0.585294	0.55835	1
BOD1L1	444.931	0.226736	0.379052	0.598165	0.54973	1
MAT2B	692.44	0.00138457	0.15638	0.00885387	0.992936	1
TLL1	334.785	0.360206	0.257166	1.40067	0.161312	1
EDC4	1502.14	0.0397016	0.140874	0.281824	0.778079	1
TRIO	1044.91	-0.0372763	0.236787	-0.157426	0.874909	1
CLEC16A	775.305	0.0296202	0.157906	0.187581	0.851205	1
CDH1	11753.2	0.0181751	0.077215	0.235384	0.813911	1
MTREX	951.777	0.130765	0.364645	0.358609	0.719888	1
DNAH5	137.024	-0.300667	0.215441	-1.39559	0.162838	1
ZFYVE16	723.379	-0.0215456	0.371693	-0.0579662	0.953776	1
RIPOR1	1619.48	-0.0381391	0.22753	-0.167622	0.86688	1
RAI14	414.397	-0.0399234	0.262065	-0.152342	0.878918	1
PNKP	422.189	0.0641207	0.18941	0.338529	0.734965	1
PHLPP2	310.168	0.0725877	0.286025	0.253781	0.799665	1
SPDL1	242.982	0.0712081	0.46824	0.152076	0.879127	1
STAU2	826.878	0.235684	0.27399	0.860193	0.389683	1
SLC66A1	183.96	-0.0646271	0.190207	-0.339772	0.734028	1
CTNS	5.43455	1.2577	1.46441	0.858848	0.390424	1
RTN4R	186.869	0.050211	0.215707	0.232774	0.815937	1
PHF23	2406.79	-0.0972484	0.161833	-0.60092	0.547893	1
INPP4A	251.661	-0.130466	0.262918	-0.496224	0.619736	1
RAB27B	119.327	0.843755	0.613861	1.3745	0.169285	1
PSMA4	3163.04	0.0660269	0.318867	0.207068	0.835957	1
LSG1	1599.53	0.0544236	0.107591	0.50584	0.612969	1
PARP3	594.175	0.0402063	0.114205	0.352053	0.724798	1
TNC	19.0395	-1.27587	0.549087	-2.32361	0.0201462	1
THAP3	349.588	0.0932311	0.175901	0.530019	0.596099	1
TDP1	588.522	-0.0244605	0.162164	-0.150838	0.880103	1
AIFM2	48.8055	0.121077	0.286035	0.423294	0.672081	1
SPATA7	207.972	-0.0201933	0.20085	-0.100539	0.919916	1
MED17	756.601	0.00449087	0.214002	0.0209852	0.983257	1
RETSAT	2129.55	0.00624924	0.146752	0.0425837	0.966033	1
CAPG	17.8096	0.656762	0.517581	1.26891	0.204475	1
AP2S1	2076.03	-0.0867316	0.262863	-0.329949	0.741438	1
TG	6.88888	-1.36416	1.0761	-1.26769	0.20491	1
DCUN1D1	329.692	0.22917	0.443247	0.517026	0.605138	1
JADE2	370.66	0.101268	0.18946	0.534511	0.592988	1
ZIC2	451.52	0.215924	0.126536	1.70642	0.0879291	1
TRIT1	34.7897	0.0595659	0.657332	0.0906177	0.927796	1
CUL7	296.325	-0.00977048	0.258685	-0.0377698	0.969871	1
CTNNA1	9837.85	0.0137448	0.0770516	0.178384	0.858421	1
PHKA2	59.3442	0.726441	0.403863	1.79873	0.072061	1
CNTLN	187.882	0.181761	0.437854	0.415118	0.678056	1
EPHA3	24.974	0.146253	0.419784	0.348401	0.727539	1
HSPA5	21697.1	-0.182782	0.128898	-1.41804	0.15618	1
DSG2	2722.57	0.021562	0.351839	0.0612837	0.951133	1
GEMIN8	423.89	0.097439	0.216367	0.450342	0.652464	1
OFD1	47.4432	0.284519	0.757508	0.375599	0.707215	1
GPM6B	65.0583	-0.389922	0.400791	-0.972881	0.330612	1
MAGEC2	58.0685	-0.0072186	0.291601	-0.024755	0.98025	1
PREX2	10.1535	-0.237815	1.12903	-0.210635	0.833172	1
WDR37	69.5204	-0.371557	0.508829	-0.73022	0.465256	1
YTHDC2	586.688	0.0016613	0.397265	0.00418185	0.996663	1
CTPS2	765.792	0.0217929	0.157395	0.13846	0.889877	1
ATP6V1H	1643.55	0.135784	0.144179	0.941776	0.346308	1
POLR2B	3209.89	0.184111	0.259746	0.708813	0.478441	1
FAM214A	1005.78	0.0888306	0.465383	0.190876	0.848622	1
ARAP2	37.9346	0.177917	0.642423	0.276946	0.781822	1
TPR	656.151	0.0683726	0.598791	0.114184	0.909092	1
CP	4.422	2.28971	1.1742	1.95002	0.0511742	1
KIAA0556	912.162	-0.0929484	0.174879	-0.531502	0.595071	1
DTNBP1	109.41	0.27925	0.257671	1.08375	0.278477	1
ANO2	16.0653	-0.257258	0.716466	-0.359064	0.719547	1
C12orf4	257.681	-0.0640931	0.305397	-0.209868	0.833771	1
SCML1	217.096	0.0528512	0.350834	0.150645	0.880256	1
WWC3	11.654	0.21391	0.568923	0.375992	0.706923	1
ARHGAP6	824.395	-0.128139	0.148134	-0.865023	0.387026	1
MAP4	8956.88	0.0141564	0.164828	0.0858861	0.931557	1
GOPC	399.802	0.00728818	0.378542	0.0192533	0.984639	1
USP28	554.328	-0.00450966	0.21446	-0.0210279	0.983223	1
HDAC9	2.44745	0.424319	1.66567	0.254743	0.798922	1
TSPAN17	1705.35	-0.147123	0.229367	-0.641431	0.521242	1
NOP16	243.319	0.0560593	0.259443	0.216076	0.828929	1
CC2D2A	60.5165	0.0267165	0.307612	0.0868513	0.93079	1
RRM2B	20.4224	0.085493	0.64495	0.132557	0.894543	1
ZNF800	260.683	-0.0113924	0.359041	-0.03173	0.974687	1
SNX29	706.492	-0.0916864	0.144291	-0.635425	0.525151	1
MRPS10	654.734	0.0782692	0.105546	0.741568	0.458349	1
RSF1	590.459	-0.068485	0.340304	-0.201247	0.840506	1
VPS13D	1523.71	0.149043	0.219146	0.680107	0.496437	1
FAM120A	5358.39	-0.0636214	0.0964646	-0.659531	0.509555	1
R3HDM1	1084.75	0.0425611	0.157043	0.271015	0.786379	1
COL9A2	135.919	-0.139979	0.213498	-0.655648	0.512051	1
KITLG	79.4437	0.384287	0.467555	0.821908	0.411129	1
ERCC8	26.2355	-0.126529	0.405671	-0.311899	0.755117	1
ADAMTS6	6.90038	-0.60143	0.988171	-0.608629	0.54277	1
H6PD	306.144	-0.0207267	0.425363	-0.0487271	0.961137	1
VAMP3	2358.67	0.0141696	0.105942	0.133749	0.893601	1
PER3	556.111	0.282546	0.340316	0.830246	0.4064	1
EPN3	1589.55	0.122522	0.229901	0.532933	0.59408	1
LTBP1	46.4636	0.547872	0.40449	1.35447	0.175585	1
RCN1	38.6609	0.874606	0.600366	1.45679	0.145175	1
ELN	10.6687	0.922468	0.688424	1.33997	0.180255	1
RFC2	888.215	-0.0123245	0.204987	-0.0601233	0.952057	1
ARID1B	639.581	0.178664	0.233963	0.763641	0.445081	1
CLPTM1L	2657.21	-0.0464435	0.179709	-0.258437	0.79607	1
FOXP3	10.1245	0.592268	1.09637	0.54021	0.589052	1
PPP1R3F	65.524	-0.924619	0.439706	-2.10281	0.0354821	1
HEXB	2516.71	0.0393436	0.159086	0.247311	0.804668	1
PTCD2	545.753	0.0690869	0.180456	0.382846	0.701834	1
NEXMIF	52.7464	-0.840321	1.10423	-0.761002	0.446656	1
JKAMP	690.779	0.128386	0.237981	0.539478	0.589557	1
ARHGEF5	867.385	-0.142511	0.135348	-1.05292	0.292376	1
NFE2L3	239.715	-0.0514477	0.271364	-0.18959	0.849631	1
MCUR1	895.543	0.117392	0.160924	0.729485	0.465705	1
LIMA1	1075.98	0.157376	0.316746	0.496854	0.619292	1
LETMD1	1427.3	0.133063	0.110884	1.20001	0.230134	1
SLC4A8	4.28273	-1.34357	1.41884	-0.946951	0.343664	1
LAMC3	33.1562	0.34779	0.476898	0.729275	0.465833	1
PTGER3	5.06221	0.806997	1.13834	0.708927	0.47837	1
MAPK9	1109.2	-0.0666369	0.158041	-0.421643	0.673286	1
COL23A1	11.779	0.0165232	0.590033	0.0280039	0.977659	1
BCAR1	647.532	0.133277	0.335203	0.3976	0.690925	1
FAM160A2	326.412	-0.0607245	0.282147	-0.215223	0.829594	1
HOMER3	373.976	0.0258355	0.266271	0.0970272	0.922705	1
RAD51	231.635	-0.0327474	0.227811	-0.143748	0.885699	1
POLQ	148.347	0.383893	0.426573	0.899948	0.368148	1
PIK3CB	1549.5	0.113352	0.215183	0.52677	0.598353	1
THOC3	44.7255	0.223286	0.608937	0.366681	0.713857	1
HEBP2	2341.16	-0.133835	0.140422	-0.953088	0.340546	1
MPHOSPH9	179.763	-0.617353	0.343147	-1.79909	0.0720043	1
PLEKHA5	340.639	-0.0109959	0.3517	-0.0312651	0.975058	1
PRSS8	2478.94	0.0183941	0.273431	0.0672714	0.946366	1
SIKE1	425.681	0.233773	0.207637	1.12587	0.260221	1
RRP12	38.6922	0.283978	0.585261	0.485215	0.627524	1
FNIP2	431.6	-0.0443043	0.363516	-0.121877	0.902996	1
MSMO1	747.999	-0.0860678	0.231342	-0.372036	0.709866	1
TTC17	1079.02	0.179863	0.147843	1.21658	0.223762	1
ALX4	158.261	-0.0378557	0.183705	-0.206068	0.836738	1
FSTL4	11.4959	0.0968354	0.618692	0.156516	0.875626	1
FOXN3	1166.37	0.0340025	0.209967	0.161942	0.871351	1
AKR7A2	1031.86	-0.136533	0.244286	-0.558907	0.576225	1
MRTO4	728.896	-0.116409	0.201911	-0.576538	0.564251	1
NNAT	4.32832	0.252971	0.930778	0.271785	0.785788	1
USE1	739.642	-0.0638034	0.281357	-0.22677	0.820603	1
MCF2L2	23.1962	0.395273	0.512699	0.770964	0.440728	1
NRIP2	19.4162	-0.0382234	0.428087	-0.089289	0.928852	1
LAMA3	947.574	-0.346632	0.199933	-1.73374	0.0829642	1
AP5M1	497.196	0.0441496	0.325023	0.135835	0.891952	1
ANAPC4	68.6506	-0.0642954	0.362156	-0.177535	0.859088	1
TRAPPC3	1354.64	-0.0680476	0.125001	-0.544375	0.586184	1
THRAP3	5864.56	-0.311028	0.213642	-1.45584	0.145437	1
PHPT1	559.536	-0.032428	0.19016	-0.170531	0.864593	1
ENTPD2	216.298	0.00625206	0.304678	0.0205202	0.983628	1
ARID4B	351.984	0.164717	0.537989	0.306172	0.759474	1
OPN3	24.7898	0.0341946	0.39658	0.0862237	0.931289	1
SDCCAG8	326.276	-0.00660526	0.15784	-0.0418478	0.96662	1
PTPRN	11.902	-0.966346	0.912588	-1.05891	0.289642	1
KIF1B	3064.3	-0.00870327	0.167661	-0.0519098	0.958601	1
FOXC1	6.53744	-0.486673	0.754862	-0.644718	0.51911	1
TBC1D22A	588.803	-0.0776801	0.219567	-0.353787	0.723499	1
SYNE2	858.941	0.204563	0.107327	1.90599	0.056652	1
PLEKHH1	48.5826	0.276285	0.77772	0.355249	0.722403	1
ATP9A	350.18	-0.409198	1.29888	-0.315038	0.752733	1
FAM168A	2237.2	0.0562549	0.102454	0.549074	0.582955	1
RELT	124.126	-0.394175	0.191486	-2.05851	0.0395411	1
GALC	5.5662	0.63102	0.873436	0.722457	0.470014	1
NOP58	544.977	0.222198	0.402192	0.552468	0.580628	1
SZRD1	3611.93	-0.155168	0.184962	-0.838916	0.401516	1
KCNH2	68.4389	-0.364139	0.319745	-1.13884	0.254768	1
CUL1	1487.51	0.0469883	0.193496	0.242839	0.80813	1
FAM114A2	547.665	-0.00623744	0.220214	-0.0283244	0.977403	1
CYFIP2	2945.7	0.0283121	0.177968	0.159086	0.873601	1
TAB2	1184.11	-0.0459207	0.278157	-0.165089	0.868874	1
GINM1	797.939	0.00352931	0.135416	0.0260627	0.979207	1
EIF2AK2	702.739	-0.159602	0.271672	-0.587479	0.556882	1
USP36	942.844	0.389949	0.21886	1.78172	0.0747943	1
KMT2C	644.706	-0.0379603	0.349872	-0.108498	0.913601	1
CCDC85A	68.4456	-0.227279	0.430483	-0.527962	0.597525	1
PUM2	1305.68	-0.0759076	0.415634	-0.182631	0.855088	1
MRPL43	847.723	0.0132912	0.202106	0.0657636	0.947566	1
ITIH4	6.86557	0.133027	0.966707	0.137608	0.89055	1
HPF1	458.115	0.205883	0.200961	1.02449	0.305605	1
ZFR	1641.94	0.00366755	0.384404	0.00954088	0.992388	1
ZNF280C	35.9184	0.218111	0.583144	0.374025	0.708386	1
PHF21B	5.62505	1.34993	1.12722	1.19757	0.231083	1
RC3H2	1280.53	0.130036	0.262064	0.4962	0.619753	1
IL17RB	147.135	0.118188	0.213394	0.553848	0.579683	1
TRAF3IP2	376.157	0.068611	0.185089	0.370693	0.710866	1
GYG2	406.355	-0.000231543	0.147681	-0.00156785	0.998749	1
DCBLD2	129.294	0.240597	0.254998	0.943525	0.345412	1
SOAT1	721.349	-0.0195796	0.349621	-0.0560024	0.95534	1
PKP2	45.5045	0.367109	0.256232	1.43272	0.151938	1
GDI2	7324.54	0.0168357	0.118775	0.141744	0.887282	1
PRDM1	2.65455	0.18452	1.61643	0.114153	0.909116	1
ATG5	516.682	0.0748036	0.34768	0.215151	0.82965	1
PITHD1	601.728	-0.100068	0.107349	-0.932178	0.351245	1
MTA3	565.552	0.109641	0.139807	0.78423	0.432905	1
USP13	934.889	0.0868978	0.231314	0.375671	0.707162	1
ATP11B	1604.01	-0.0175144	0.377468	-0.0463997	0.962992	1
CDK14	423.05	0.266085	0.364642	0.729715	0.465564	1
SEC61A1	17718.3	-0.115778	0.192946	-0.600051	0.548472	1
PPP1R12A	1061.28	0.0831797	0.483483	0.172043	0.863404	1
CAMK2B	636.985	0.0383951	0.142713	0.269036	0.787902	1
CROCC	165.187	-0.195233	0.190053	-1.02726	0.3043	1
POLR3E	1027.84	-0.147748	0.123215	-1.19911	0.230486	1
ATP2B4	159.826	0.484534	0.307195	1.57728	0.11473	1
ZC3H11A	927.085	0.0376553	0.415094	0.0907151	0.927719	1
RIOK2	305.016	0.0807149	0.33282	0.242518	0.808378	1
YIPF1	920.957	-0.0412134	0.219754	-0.187543	0.851235	1
NDC1	1333.31	-0.0721688	0.17591	-0.41026	0.681616	1
FLYWCH1	521.917	-0.0739722	0.224132	-0.330039	0.74137	1
UNKL	629.098	0.113879	0.194952	0.584138	0.559127	1
TBXAS1	35.6983	0.210638	0.357443	0.589292	0.555665	1
PARP12	446.682	-0.0172957	0.148986	-0.11609	0.907581	1
ALDH18A1	4923.83	-0.0542941	0.179057	-0.303222	0.761721	1
TARBP1	317.79	-0.195875	0.354117	-0.553136	0.580171	1
GATB	843.168	0.074799	0.157122	0.476058	0.634033	1
MXD1	176.336	-0.209385	0.225817	-0.92723	0.353807	1
CDK17	158.512	0.2159	0.394885	0.546741	0.584557	1
DNAJC25	236.768	-0.151764	0.261216	-0.580988	0.561248	1
PSD	47.121	0.379801	0.358577	1.05919	0.289514	1
CTDP1	540.182	-0.132938	0.125495	-1.05931	0.289458	1
YBX3	4756.16	-0.112831	0.211403	-0.533727	0.59353	1
STYK1	218.385	0.161331	0.292598	0.551376	0.581376	1
WNK1	3505.83	-0.126057	0.189882	-0.66387	0.506773	1
CCAR1	1937.28	-0.0190691	0.376014	-0.0507139	0.959554	1
OGFR	1273.19	-0.0523074	0.187335	-0.279218	0.780078	1
PIGV	35.7781	-0.106652	0.363083	-0.293739	0.768957	1
PTPRU	887.256	-0.293481	0.211764	-1.38589	0.165782	1
SNRNP40	1672.4	-0.153491	0.125346	-1.22454	0.220747	1
QSER1	487.604	0.166402	0.378064	0.440144	0.659833	1
MPC1	436.408	0.121694	0.127627	0.953513	0.34033	1
ACAA1	2255.7	-0.140335	0.150602	-0.931825	0.351427	1
BCAT1	5.09633	-0.296357	1.27584	-0.232285	0.816317	1
HDAC7	970.142	-0.0801353	0.185221	-0.432648	0.665271	1
LZTS1	13.9243	0.524911	0.489877	1.07152	0.283937	1
SPAG4	14.6561	0.152254	0.772304	0.197143	0.843716	1
NCKAP1	1849.25	0.0432924	0.445216	0.0972391	0.922537	1
MRPS35	2564.63	0.0402858	0.147526	0.273076	0.784794	1
GUCY1B1	6.44362	0.924008	1.10322	0.837558	0.402279	1
SFSWAP	83.1236	0.487821	0.601239	0.81136	0.417159	1
TNK2	136.436	-0.297063	0.373021	-0.79637	0.425817	1
MON2	813.935	0.0937733	0.347011	0.270231	0.786982	1
CDH3	22.0288	0.190961	0.547784	0.348607	0.727385	1
GPBP1	808.029	0.142807	0.375825	0.379983	0.703958	1
DGAT2	800.528	0.10617	0.183767	0.577742	0.563439	1
ZNF112	44.7558	0.209998	0.503149	0.417368	0.676409	1
CS	10004.5	0.00909813	0.212678	0.0427788	0.965878	1
MRPS24	1910.59	-0.0453633	0.22975	-0.197447	0.843478	1
ELMO2	1282.38	-0.189517	0.151385	-1.25189	0.210611	1
WAPL	552.438	0.183072	0.336633	0.543831	0.586557	1
VMP1	2294.93	-0.0140761	0.113056	-0.124506	0.900915	1
APPBP2	1448.4	-0.531849	0.279718	-1.90137	0.0572531	1
POLD1	123.528	0.210049	0.390584	0.537781	0.590728	1
SEZ6	4.11025	-0.256718	1.07844	-0.238046	0.811845	1
EIF4B	8720.89	0.0211372	0.176739	0.119596	0.904804	1
BICRA	234.344	-0.105964	0.218039	-0.485986	0.626977	1
SPHK2	577.303	-0.383928	0.286176	-1.34158	0.179732	1
RPL18	15823	-0.0340657	0.248728	-0.13696	0.891062	1
CA11	168.405	-0.307277	0.286673	-1.07187	0.283777	1
ISOC2	1784.62	-0.0161004	0.28693	-0.0561128	0.955252	1
U2AF2	4848.79	-0.176628	0.224038	-0.788384	0.430472	1
EPN1	4096.93	-0.102603	0.280017	-0.366418	0.714053	1
MED29	2242.73	-0.0150149	0.179582	-0.0836105	0.933366	1
ZNF275	14.1257	-2.01153	0.864827	-2.32593	0.0200223	1
MTMR1	1178.53	-0.111376	0.156409	-0.712079	0.476416	1
GPC1	648.864	-0.133267	0.22639	-0.58866	0.556089	1
ADCK1	412.1	0.0114749	0.206601	0.0555415	0.955707	1
HAGH	1221.73	-0.111753	0.180166	-0.620277	0.535076	1
RNF4	2740.46	-0.101984	0.0967508	-1.05409	0.291843	1
CASP8	234.254	0.416318	0.287183	1.44966	0.147153	1
LIMCH1	5687.72	-0.0361503	0.237019	-0.152521	0.878776	1
INTS13	450.383	0.291036	0.333718	0.872102	0.383153	1
TM7SF3	2145.58	-0.104172	0.093592	-1.11304	0.26569	1
DLX3	3.1775	1.66537	1.21745	1.36791	0.17134	1
SPA17	129.404	-0.137909	0.279866	-0.492769	0.622176	1
ATP2C2	89.1061	0.24226	0.334527	0.724187	0.468951	1
NGFR	11.4335	0.373305	0.648572	0.57558	0.564899	1
CDON	351.084	-0.130254	0.266306	-0.489115	0.62476	1
TAF2	542.386	0.134046	0.34817	0.385001	0.700237	1
HIPK2	2638.82	-0.308158	0.22064	-1.39666	0.162517	1
TNPO3	1529.4	-0.0777712	0.105675	-0.735944	0.461765	1
BORCS8-MEF2B	59.5404	0.560862	0.571412	0.981536	0.326328	1
RFXANK	1307.19	-0.0751451	0.236717	-0.317446	0.750905	1
TMEM161A	252.277	-0.242306	0.244922	-0.989321	0.322506	1
LPAR2	486.948	-0.17436	0.248959	-0.700355	0.483706	1
CTSA	55.681	0.404331	0.300871	1.34387	0.178991	1
SUGP2	1907.46	0.0380394	0.128578	0.295847	0.767347	1
SLC12A2	818.72	0.114537	0.399674	0.286576	0.774437	1
SNX24	99.4449	0.115496	0.219904	0.52521	0.599437	1
EYA2	69.4998	-0.0160629	0.302668	-0.0530709	0.957675	1
CNN2	704.9	-0.226409	0.222887	-1.0158	0.309723	1
ABCA7	21.2987	1.06883	0.558436	1.91397	0.0556246	1
SNCAIP	4.40332	-1.23585	1.06787	-1.1573	0.247148	1
DDX20	288.309	-0.117046	0.233527	-0.501207	0.616225	1
BTBD1	13.9832	0.944549	0.774426	1.21968	0.222588	1
FAR2	27.2575	0.291637	0.537706	0.542372	0.587562	1
BCAS1	25.3355	0.315776	0.387981	0.813896	0.415705	1
SBNO2	1850.16	-0.564461	0.238	-2.37168	0.0177072	1
PMS1	45.2891	-0.32312	0.424457	-0.761255	0.446505	1
HMG20B	3410.54	-0.00453022	0.183991	-0.0246219	0.980357	1
CALCRL	6.07103	-0.0850035	1.166	-0.072902	0.941884	1
TAF11	15.032	0.0883424	0.750849	0.117657	0.90634	1
ANKS1A	1054.32	-0.00460757	0.107572	-0.0428324	0.965835	1
AP3D1	2428.88	-0.277208	0.192538	-1.43976	0.149937	1
ZNF76	885.984	-0.0826057	0.160549	-0.51452	0.606888	1
SLC9A3R2	1535.68	-0.171322	0.247038	-0.693506	0.487992	1
NTHL1	342.158	-0.0327258	0.235119	-0.139188	0.889302	1
UHRF1BP1	1278.12	0.0666067	0.192725	0.345605	0.72964	1
IPO5	4361.62	0.022095	0.108141	0.204316	0.838106	1
OAT	3.17792	-0.997149	1.56963	-0.635278	0.525247	1
WDR3	1746.75	-0.00943726	0.169953	-0.0555285	0.955717	1
PKN2	620.448	0.243437	0.505617	0.481466	0.630185	1
WDR18	46.5698	0.511924	0.36123	1.41717	0.156434	1
TRAM2	552.909	0.0273956	0.118968	0.230276	0.817877	1
NTN1	20.8568	-0.336803	0.55207	-0.610073	0.541813	1
GLP2R	16.9259	-0.953033	0.545007	-1.74866	0.0803494	1
MCM10	347.006	0.157403	0.245982	0.639895	0.522241	1
DGKA	85.879	0.332296	0.333886	0.995238	0.31962	1
ERBB3	449.122	0.309208	0.205314	1.50602	0.132061	1
ANKRD44	282.747	-0.0817557	0.35719	-0.228885	0.818958	1
KARS1	692.767	-0.192892	0.188736	-1.02202	0.306772	1
ADAT1	549.829	-0.065609	0.153959	-0.426145	0.670002	1
PDIA5	972.344	-0.237544	0.175802	-1.35121	0.176629	1
TBC1D22B	350.798	0.0378511	0.125098	0.302571	0.762216	1
NDUFB4	7447.1	0.0391426	0.219167	0.178597	0.858254	1
SPEN	1215.94	0.0106488	0.151134	0.0704592	0.943828	1
MYLK	37.4185	-1.24095	1.0091	-1.22976	0.218785	1
ZC3H15	599.488	0.124647	0.363026	0.343355	0.731332	1
MAP2K4	1249.01	-0.239541	0.305423	-0.784293	0.432868	1
PACC1	179.717	-0.350663	0.364607	-0.961755	0.336173	1
SNAP91	26.4972	-0.115234	0.534851	-0.21545	0.829416	1
SLK	529.005	0.213404	0.563168	0.378934	0.704737	1
CYB5R4	168.652	-0.320329	0.683026	-0.468985	0.639081	1
COL17A1	3.01932	0.746704	1.27441	0.585921	0.557929	1
GSTO2	77.3596	0.443283	0.27472	1.61358	0.106619	1
SEC61A2	194.513	0.144282	0.180323	0.800133	0.423634	1
TLE2	466.227	0.201966	0.316282	0.638562	0.523108	1
ASB1	943.364	0.156739	0.176208	0.889511	0.373728	1
FAM107B	548.151	-0.083024	0.271529	-0.305765	0.759784	1
ME1	1523.66	0.0748908	0.173616	0.431358	0.666208	1
CDK13	924.787	-0.0103109	0.213226	-0.0483569	0.961432	1
MTHFD2	3323.97	0.113839	0.152813	0.744956	0.456299	1
SLC9A7	734.436	0.0237679	0.188332	0.126202	0.899572	1
FOXJ2	937.774	-0.0471268	0.149766	-0.314669	0.753013	1
YBX1	25097.8	-0.0777962	0.166174	-0.468162	0.639669	1
PDE4A	21.0537	0.0701465	0.427073	0.16425	0.869535	1
PPP2R5A	761.422	0.097822	0.328996	0.297335	0.766211	1
CTNNA2	10.7713	-1.33665	0.835146	-1.6005	0.109488	1
ELAVL1	3507.68	-0.0175942	0.20268	-0.0868077	0.930824	1
DIP2B	1300.98	-0.00544601	0.245694	-0.0221658	0.982316	1
SMARCD1	680.712	-0.0201311	0.14835	-0.1357	0.892058	1
KDM4A	2588.07	0.00168211	0.0787138	0.02137	0.982951	1
NFYC	1125.15	-0.0383642	0.226895	-0.169084	0.865731	1
ZMYND12	213.61	0.331739	0.191151	1.73549	0.0826546	1
SLC9A3	1406.26	0.0685398	0.110331	0.62122	0.534455	1
NGEF	376.638	0.108486	0.160945	0.674059	0.500274	1
ASPM	80.6796	0.268158	0.610756	0.43906	0.660618	1
ELOVL1	3014.76	-0.10652	0.216276	-0.492518	0.622353	1
ZNRD1	161.199	0.0144181	0.242259	0.0595151	0.952542	1
ZBTB11	12.6193	0.282822	0.650349	0.434877	0.663651	1
ATXN3	98.3209	0.18809	0.403393	0.466271	0.641022	1
GOLGA5	940.065	0.00592525	0.297153	0.0199401	0.984091	1
FGFR2	14.128	-1.1023	0.788115	-1.39866	0.161916	1
LRRC40	161.477	0.364034	0.525025	0.693366	0.48808	1
ISOC1	682.185	0.117086	0.172845	0.677408	0.498147	1
EML1	227.611	0.614934	0.361848	1.69943	0.089239	1
TRMT11	73.7866	-0.0689295	0.445021	-0.15489	0.876908	1
THUMPD1	1094.15	-0.131204	0.386911	-0.339105	0.73453	1
MSANTD3	282.456	0.00395425	0.23522	0.0168108	0.986588	1
KIF26A	11.2181	-0.347188	0.591348	-0.587114	0.557127	1
ATG2B	745.024	0.204784	0.44209	0.463218	0.643208	1
ARFGEF1	1039.98	0.0531968	0.372379	0.142857	0.886403	1
ZFAT	357.177	0.018806	0.206278	0.091168	0.927359	1
MTFR1	1305.88	-0.0272094	0.225524	-0.12065	0.903969	1
STAG3	41.8857	0.172909	0.449405	0.384751	0.700422	1
FECH	4072.72	-0.13277	0.120101	-1.10549	0.268949	1
MYO9A	337.908	0.11116	0.458416	0.242486	0.808403	1
DDX3Y	704.161	0.229132	0.432984	0.529193	0.596672	1
PFKP	2764.73	-0.0292179	0.224552	-0.130116	0.896475	1
IDI1	1112.97	-0.00250361	0.321095	-0.00779708	0.993779	1
SP100	181.133	-0.0517279	0.275123	-0.188018	0.850863	1
KLF6	310.783	-0.335923	0.33362	-1.0069	0.313981	1
NEO1	1642.7	-0.0123163	0.11337	-0.108637	0.91349	1
TRAM1	2294.14	-0.0872335	0.254908	-0.342216	0.732189	1
PHKA1	722.874	-0.12266	0.0887794	-1.38163	0.167085	1
TNFRSF1A	68.8514	-0.476728	0.542483	-0.878788	0.379516	1
CACNB1	59.5887	-0.169905	0.260576	-0.652038	0.514377	1
EVI5	183.493	0.561243	0.552229	1.01632	0.309476	1
STOML1	532.636	-0.0574417	0.255696	-0.224648	0.822253	1
PKM	34112.2	-0.0716963	0.276579	-0.259225	0.795461	1
DHX29	626.734	0.147124	0.441958	0.332891	0.739217	1
DNTTIP2	508.175	0.110733	0.373308	0.296627	0.766752	1
METTL22	327.15	0.0966727	0.234814	0.411698	0.680561	1
TP53BP1	728.242	0.143472	0.288034	0.498107	0.618409	1
TRO	6.70933	0.501304	0.712287	0.703795	0.48156	1
RHOA	13629.4	-0.0310539	0.248027	-0.125204	0.900362	1
DHX8	378.373	-0.0382644	0.252306	-0.151659	0.879456	1
PMS2P4	106.511	0.202484	0.238409	0.84931	0.395709	1
PRKCZ	1490.01	-0.0878514	0.2234	-0.393247	0.694137	1
ZFY	265.337	0.261505	0.384147	0.680741	0.496035	1
IARS2	3664.23	0.0910077	0.224615	0.405173	0.685351	1
SYT1	2.82367	0.443748	1.09105	0.406717	0.684216	1
NAV3	111.896	0.2141	0.517884	0.413412	0.679305	1
IDH3G	1819.56	-0.00876308	0.262809	-0.0333439	0.9734	1
ROGDI	1103.22	0.00392671	0.297334	0.0132064	0.989463	1
PDZD4	189.557	-0.0413658	0.300323	-0.137738	0.890448	1
ROCK1	545.297	0.149937	0.50782	0.295256	0.767798	1
CBFB	657.192	0.125624	0.337898	0.371781	0.710056	1
PDK3	291.684	0.0937876	0.192456	0.487319	0.626032	1
HYAL2	1478.25	-0.164496	0.244938	-0.671584	0.501849	1
HDAC4	167.859	-0.0606757	0.395952	-0.15324	0.878209	1
RASSF1	536.13	-0.0212562	0.105083	-0.202281	0.839697	1
FGFR3	10.8464	-1.07949	1.28349	-0.841057	0.400316	1
IFI35	144.346	0.310326	0.220873	1.405	0.160022	1
HEATR6	9.58286	-0.285898	0.902989	-0.316613	0.751537	1
COASY	1860.3	-0.149754	0.206719	-0.724435	0.468799	1
PLEKHH3	1882.47	-0.0510894	0.135716	-0.376444	0.706587	1
MEF2A	600.994	0.00799643	0.39741	0.0201214	0.983947	1
OTUD5	1751.68	-0.0852452	0.183713	-0.464012	0.642639	1
TFE3	1911.88	-0.0640508	0.168569	-0.379968	0.703969	1
TBC1D25	588.63	-0.0763897	0.233764	-0.326781	0.743834	1
ACSL4	60.9474	0.197124	0.542643	0.363266	0.716407	1
INPP5A	1027.5	0.0422042	0.0961968	0.438727	0.660859	1
GPKOW	560.223	-0.129337	0.15058	-0.858922	0.390384	1
GRIPAP1	665.388	-0.059937	0.122538	-0.489132	0.624749	1
FTSJ1	979.793	-0.021956	0.210531	-0.104289	0.91694	1
PRR11	283.422	-0.0770156	0.16164	-0.476465	0.633743	1
REEP1	75.5735	0.104786	0.306208	0.342204	0.732198	1
ATP11A	710.785	-0.0649185	0.238141	-0.272606	0.785156	1
POLR1A	2190.81	-0.00380366	0.22572	-0.0168512	0.986555	1
LAPTM4A	3089.05	-0.0504379	0.0967496	-0.521324	0.602141	1
TTC7A	178.426	-0.0914499	0.177084	-0.51642	0.605561	1
IP6K2	2862.14	-0.0638968	0.0768598	-0.831343	0.40578	1
SRBD1	227.358	0.20537	0.333455	0.615885	0.53797	1
KIF2A	86.1439	0.298116	0.417037	0.714842	0.474707	1
PSME4	2005.45	0.142492	0.296142	0.481162	0.630401	1
IFT80	129.164	0.425074	0.601653	0.70651	0.479871	1
SIRT2	2126.57	0.0482785	0.243878	0.197961	0.843075	1
ERLEC1	527.611	0.00833625	0.28741	0.0290047	0.976861	1
PPP2R5B	665.774	-0.15781	0.206521	-0.764136	0.444786	1
PYGM	6.13042	0.468437	1.11037	0.421876	0.673115	1
PAGE1	34.3263	0.354841	0.350288	1.013	0.311061	1
PITX1	1406.31	0.170089	0.221534	0.767777	0.44262	1
MAST4	484.788	0.072332	0.226824	0.31889	0.74981	1
ADAM7	58.1908	-0.0631642	0.529348	-0.119325	0.905018	1
NUP133	1571.74	-0.115918	0.127359	-0.910167	0.362735	1
NUCKS1	7384.6	0.0844235	0.233315	0.361844	0.717469	1
VPS35	2983.94	-0.0842288	0.161617	-0.521161	0.602254	1
DNAJA2	2390.57	-0.00852342	0.154072	-0.0553209	0.955883	1
BCL3	114.175	-0.0487475	0.218906	-0.222687	0.823779	1
KCNAB2	754.096	-0.124005	0.20367	-0.608852	0.542622	1
ABCC9	10.139	0.938381	0.759556	1.23543	0.216669	1
GAL	531.356	-0.153645	0.24238	-0.633901	0.526145	1
CLEC2D	20.2237	0.467506	0.608396	0.768423	0.442236	1
MAOB	2.56304	-1.30892	1.26543	-1.03437	0.300964	1
RORA	31.8151	0.888885	0.559963	1.5874	0.112422	1
TGFBR3	199.508	0.0941532	0.429522	0.219205	0.82649	1
HES2	30.098	-0.327198	0.654378	-0.500014	0.617065	1
ATP1B3	3524.34	-0.05453	0.139475	-0.390965	0.695823	1
NEDD4	188.33	0.213268	0.540521	0.394561	0.693167	1
PIGB	354.895	0.10654	0.132479	0.804203	0.42128	1
MAPK6	2328.39	-0.0185188	0.367432	-0.0504006	0.959803	1
GNB5	432.012	-0.0246954	0.122552	-0.201509	0.8403	1
RAB27A	169.751	-0.220708	0.182242	-1.21107	0.225868	1
HDHD5	1565.99	-0.0948131	0.194289	-0.488	0.62555	1
UFD1	1338.12	-0.0661891	0.143786	-0.460329	0.64528	1
LRP6	520.96	0.428721	0.314351	1.36383	0.17262	1
PHRF1	49.3935	-3.55685	1.72612	-2.06061	0.0393405	1
ELP1	753.415	-0.217398	0.347378	-0.625825	0.53143	1
NUCB2	943.572	-0.0318125	0.376091	-0.0845871	0.93259	1
PFN2	2403.93	0.0556386	0.12562	0.442914	0.657828	1
PTPN3	839.451	0.0882016	0.2817	0.313105	0.754201	1
SPTB	31.3094	-0.780388	0.565361	-1.38034	0.167483	1
SLC44A1	2020.02	0.186484	0.247998	0.75196	0.452075	1
TMEM260	302.551	-0.0832434	0.398013	-0.209148	0.834333	1
SMG6	1248.14	0.035345	0.148374	0.238215	0.811714	1
EXOC5	815.011	-0.141914	0.471307	-0.301108	0.763332	1
CLTCL1	227.739	-0.245656	0.17198	-1.4284	0.153178	1
FGF22	5.00774	0.371734	0.802578	0.463175	0.643239	1
FSTL3	248.633	-0.0887453	0.235389	-0.377015	0.706162	1
DGCR2	2826.35	-0.0462726	0.126358	-0.366203	0.714213	1
RNF126	1206.43	-0.0421874	0.194772	-0.216599	0.828521	1
MNT	806.548	-0.071863	0.162107	-0.443307	0.657543	1
ZXDC	721.881	0.0402048	0.0916483	0.438686	0.660889	1
JMJD6	99.0391	-0.763081	0.49132	-1.55312	0.120394	1
POLB	389.86	0.0505865	0.126794	0.398966	0.689918	1
ST6GALNAC1	189.991	-0.226129	0.320896	-0.704681	0.481009	1
FRMPD1	205.249	0.126352	0.154311	0.818816	0.412891	1
GBA2	2388.72	-0.0799118	0.168597	-0.473982	0.635513	1
NDST1	3956.46	0.0496296	0.139609	0.35549	0.722222	1
ASNS	6985.29	0.0309618	0.200318	0.154563	0.877166	1
AP3M2	595.348	0.185111	0.149989	1.23416	0.217142	1
PABPC1	55674.6	-0.0961197	0.151645	-0.633846	0.526181	1
TESK2	298.651	0.127469	0.183563	0.694417	0.487421	1
CFAP20	844.89	-0.122891	0.136927	-0.897496	0.369454	1
CSNK2A2	1381.88	0.0619717	0.120936	0.512434	0.608347	1
PTPN21	287.934	-0.517033	0.245939	-2.10229	0.0355281	1
EIF2B3	103.616	-0.047199	0.382362	-0.123441	0.901758	1
TCOF1	887.376	-0.0654541	0.13208	-0.495565	0.620201	1
CDC42	2913.05	-0.132605	0.11646	-1.13864	0.254854	1
OSBPL3	102.918	0.257403	0.359381	0.716238	0.473844	1
EPHA8	3.1481	-0.415666	1.23012	-0.337907	0.735433	1
RAD18	250.179	0.179301	0.423385	0.423493	0.671936	1
ATP2B1	1586.33	0.606843	0.43663	1.38983	0.16458	1
TRPM5	5.62032	-0.608178	0.889246	-0.683925	0.494022	1
NCK2	442.93	0.0810026	0.16436	0.492838	0.622127	1
MAP4K4	2302.4	-0.0634432	0.153571	-0.41312	0.679519	1
MGAT4A	114.413	0.266457	0.392634	0.678639	0.497367	1
RPL31	11205.8	-0.024245	0.147986	-0.163833	0.869863	1
WDR1	6044.36	-0.105466	0.16295	-0.647225	0.517487	1
SNX13	457.1	-0.195739	0.354523	-0.552118	0.580868	1
ARHGAP10	75.9084	0.179532	0.249558	0.7194	0.471895	1
RPS6KA2	1807.74	-0.156872	0.117586	-1.33411	0.182169	1
ING3	193.619	0.114114	0.365363	0.31233	0.75479	1
VASH1	312.749	0.0410063	0.171269	0.239426	0.810775	1
BUD23	135.739	-0.0304583	0.403431	-0.0754982	0.939818	1
SEL1L	2344.8	0.101076	0.322063	0.313838	0.753644	1
TRIP13	821.216	0.0284047	0.207286	0.137032	0.891006	1
ATP6AP1	5010.39	-0.0525588	0.220528	-0.238332	0.811624	1
TCF3	1350.68	-0.0281294	0.147508	-0.190697	0.848763	1
DAZAP1	1242.48	-0.110049	0.170065	-0.647099	0.517568	1
MBD3	3726.71	-0.0364475	0.178423	-0.204276	0.838138	1
HLTF	1260.7	0.183333	0.474289	0.386542	0.699095	1
FAM50A	1392.82	-0.0590616	0.138885	-0.425255	0.67065	1
FAM3A	836.439	-0.0659934	0.24414	-0.27031	0.786922	1
CPSF1	1427.15	-0.0490493	0.15666	-0.313095	0.754209	1
PDCD2	1420.39	0.0563633	0.0717555	0.785491	0.432165	1
RDH11	9644.41	0.00519517	0.198045	0.0262323	0.979072	1
PRKACA	30.0353	0.396058	0.562482	0.704125	0.481355	1
ADGRL1	4060.09	-0.00816538	0.158229	-0.0516048	0.958844	1
ACTN1	2939.5	-0.0876042	0.178537	-0.490677	0.623655	1
ZFYVE26	743.74	-0.016457	0.15156	-0.108584	0.913533	1
RPS6KA6	619.938	0.136587	0.333076	0.410078	0.681749	1
EPN2	1295.53	-0.240692	0.109951	-2.18908	0.0285912	1
PTPN18	1615.59	-0.216304	0.19304	-1.12051	0.262495	1
LIMS2	5.76021	0.656772	1.03567	0.634154	0.52598	1
SPEG	9.25871	-1.33877	0.964453	-1.38811	0.165103	1
ALDH3A2	620.17	0.276413	0.27504	1.00499	0.3149	1
TFRC	5578.92	-0.000124477	0.252534	-0.000492912	0.999607	1
SREBF1	7053.76	0.0235027	0.146278	0.160672	0.872352	1
AFF4	2665.53	-0.0817688	0.373562	-0.21889	0.826736	1
UBE2D1	275.05	-0.0937384	0.26056	-0.359757	0.719029	1
MPP5	903.257	-0.140739	0.411483	-0.342028	0.73233	1
RHOBTB1	11.2889	0.528819	0.850725	0.62161	0.534198	1
SMC1A	103.264	-0.0510349	0.325202	-0.156933	0.875298	1
HSD17B10	118.312	0.196226	0.2709	0.724348	0.468852	1
MARK2	1954.09	0.00453901	0.136439	0.0332678	0.973461	1
HMMR	506.756	0.341591	0.493345	0.692397	0.488688	1
CHFR	564.322	-0.12713	0.119063	-1.06776	0.285629	1
P4HA2	344.983	-0.122309	0.202009	-0.605463	0.544871	1
NFATC3	1268.83	-0.0471567	0.207468	-0.227296	0.820194	1
TRNT1	459.663	0.337027	0.229946	1.46568	0.142736	1
ACADVL	8961.07	0.046332	0.153735	0.301377	0.763127	1
STK10	290.652	-0.0431308	0.198168	-0.217647	0.827704	1
FBXW11	2377.45	-0.0947483	0.125206	-0.756738	0.449207	1
ACAP1	49.278	-0.169691	0.581837	-0.291647	0.770557	1
CRMP1	59.8677	-0.270569	0.291687	-0.9276	0.353615	1
EVC	565.698	-0.0409871	0.156296	-0.26224	0.793136	1
DERL2	839.692	-0.0747129	0.125949	-0.5932	0.553048	1
NDE1	447.016	-0.157829	0.21946	-0.719169	0.472037	1
IRAG1	5.84072	0.0379067	1.01248	0.0374393	0.970135	1
TMEM38A	166.4	0.0596216	0.215551	0.2766	0.782087	1
AP1M1	1157.01	-0.159327	0.212882	-0.748428	0.454202	1
PVR	978.104	-0.119371	0.180339	-0.661925	0.508019	1
XRCC1	251.152	-0.134354	0.256413	-0.523973	0.600297	1
SCARB1	2202.23	0.0184806	0.254466	0.0726253	0.942104	1
CYP2W1	4.8481	-0.11068	0.989377	-0.111868	0.910928	1
MCM2	2767.98	-0.0548635	0.248062	-0.221168	0.824961	1
MOV10L1	31.8554	0.327956	0.506355	0.647679	0.517193	1
PANX2	21.6609	0.203094	0.737732	0.275295	0.78309	1
SELENOO	405.337	-0.0786417	0.128817	-0.610489	0.541538	1
ALPK1	180.303	0.131343	0.304473	0.431378	0.666194	1
LLGL2	605.487	-0.0128985	0.123987	-0.104031	0.917144	1
PDE8A	260.372	-0.0605971	0.291609	-0.207803	0.835383	1
CLCN4	309.788	0.301595	0.203029	1.48548	0.137417	1
NLE1	1597.35	-0.157253	0.296558	-0.53026	0.595932	1
SDHA	3720.39	-0.0404479	0.119357	-0.338881	0.7347	1
SMARCE1	3527.8	0.166866	0.102887	1.62183	0.104839	1
GSDMB	32.5891	-0.382733	0.576393	-0.664013	0.506682	1
KDM5A	69.0495	0.115525	0.501263	0.230469	0.817727	1
ADAM11	255.834	-0.10628	0.319557	-0.332586	0.739447	1
PPP2R3A	230.496	0.231241	0.363279	0.636538	0.524426	1
FERMT2	271.021	-0.131524	0.275167	-0.477977	0.632667	1
MAP3K13	835.879	0.038224	0.221306	0.17272	0.862872	1
ST6GAL1	172.318	-0.273734	0.20233	-1.35291	0.176085	1
FRY	358.925	0.239354	0.170487	1.40394	0.160336	1
PICALM	1983.27	-0.0338057	0.294177	-0.114916	0.908512	1
CLASP1	707.043	-0.313786	0.234338	-1.33903	0.18056	1
MRPS34	405.206	0.0276679	0.303579	0.091139	0.927382	1
NOTCH3	959.406	-0.0640538	0.225084	-0.284577	0.775968	1
CLNS1A	1448.57	0.0648316	0.152199	0.425966	0.670133	1
PPP2R2C	856.457	-0.0973547	0.146207	-0.665869	0.505495	1
TEAD2	36.607	-0.198219	0.426338	-0.464933	0.641979	1
EED	325.324	-0.14352	0.15866	-0.904574	0.365691	1
CDHR2	5.59077	-3.16738	1.38839	-2.28134	0.0225284	1
SNCB	6.26345	0.26658	0.775413	0.343791	0.731003	1
TSG101	1916.51	0.102075	0.0993189	1.02775	0.304069	1
NCBP3	1038.22	0.227002	0.147142	1.54274	0.122894	1
ATP2A3	2.5725	0.535665	1.45669	0.367729	0.713076	1
CA12	366.206	0.0890765	0.154368	0.577041	0.563912	1
MGLL	183.827	-0.0629715	0.219544	-0.286829	0.774243	1
NTN4	17.8609	0.272784	0.598368	0.45588	0.648477	1
BCS1L	614.987	-0.364819	0.158908	-2.29579	0.021688	1
NUAK1	316.162	-0.0458902	0.272767	-0.16824	0.866395	1
DPP8	607.353	0.143655	0.212307	0.676637	0.498636	1
SLC24A1	279.924	0.372666	0.237466	1.56934	0.116568	1
ZNF532	741.247	-0.193973	0.256672	-0.755723	0.449815	1
SCARF1	2.60394	-0.717628	4.11468	-0.174407	0.861546	1
LMAN1	2774.05	-0.019131	0.321797	-0.0594504	0.952593	1
HACD3	3898.43	0.0434071	0.248091	0.174965	0.861107	1
IPCEF1	5.40301	1.07971	1.06536	1.01348	0.310833	1
ZZEF1	1752.15	-0.0524187	0.108916	-0.481278	0.630319	1
ENO1	48180.3	-0.0374767	0.307025	-0.122064	0.902848	1
ANO8	157.595	0.0417235	0.165339	0.252351	0.80077	1
TUBE1	181.507	-0.0461668	0.242	-0.190772	0.848704	1
ARHGEF10L	343.198	0.00306871	0.177288	0.0173092	0.98619	1
KCNQ2	54.5399	-0.235629	0.414215	-0.568857	0.569453	1
TACR2	3.00784	-0.622224	0.956438	-0.650564	0.515328	1
ACTR6	283.928	0.202714	0.418058	0.484895	0.627751	1
TIPIN	310.948	0.0410537	0.148812	0.275877	0.782642	1
SRI	644.049	0.0754212	0.204828	0.368217	0.712711	1
EIF4G3	1189.86	-0.0383587	0.162244	-0.236426	0.813102	1
NUP37	279.462	0.241133	0.124981	1.92935	0.053687	1
GTSE1	654.021	-0.0864019	0.144791	-0.596735	0.550684	1
SEMA3C	562.75	-0.365287	0.444668	-0.821484	0.41137	1
TTC38	1085.89	-0.0579935	0.203285	-0.285282	0.775428	1
ACAT1	6.00848	-0.0313779	1.10624	-0.0283645	0.977371	1
GRAMD4	285.876	0.126435	0.304981	0.414568	0.678458	1
ZNF638	610.744	-0.0366075	0.501471	-0.0730002	0.941806	1
SLC25A40	425.284	-0.124042	0.21008	-0.590454	0.554887	1
TIMM21	625.912	0.0126142	0.207398	0.0608214	0.951501	1
ADD2	34.268	0.0709079	0.360823	0.196517	0.844206	1
RASAL2	156.564	-0.053714	0.401749	-0.1337	0.89364	1
VPS9D1	194.969	-0.163813	0.239949	-0.682699	0.494797	1
ZNF37A	317.758	0.331399	0.405096	0.818074	0.413315	1
MARK3	1505.68	0.112955	0.261249	0.432366	0.665475	1
SLC25A3	785.977	0.131739	0.190994	0.689752	0.49035	1
FNDC3B	500.367	-0.0347158	0.123498	-0.281104	0.778631	1
CACNG4	17.199	-0.885019	0.581799	-1.52118	0.128216	1
FRYL	372.243	-0.461796	0.416946	-1.10757	0.268048	1
TMEM131	1037.66	0.0300869	0.19975	0.150623	0.880273	1
FSCN1	296.578	-0.128288	0.258264	-0.496732	0.619378	1
ACTB	63351.4	-0.148002	0.228583	-0.647476	0.517324	1
MOCOS	919.331	-0.0863193	0.138023	-0.6254	0.531709	1
PLD1	32.4375	0.881282	0.61222	1.43949	0.150013	1
ATP12A	3.78664	0.455089	2.8922	0.157351	0.874969	1
WDR62	248.691	-0.0320653	0.187481	-0.171032	0.864199	1
DLG1	756.799	0.0244941	0.359244	0.0681822	0.945641	1
RAB7A	122.03	-0.208609	1.20412	-0.173247	0.862458	1
BCAP29	489.029	0.18773	0.308808	0.607918	0.543242	1
SEC31B	10.2888	-0.0144912	0.961299	-0.0150746	0.987973	1
SART3	1694.42	0.040915	0.102858	0.397781	0.690792	1
EXOSC7	972.625	-0.0175703	0.162332	-0.108236	0.913808	1
KIFAP3	828.968	0.0871748	0.169547	0.514162	0.607139	1
MKRN2	588.948	0.0311389	0.159646	0.19505	0.845354	1
MCM6	1549.24	0.0582448	0.149927	0.388488	0.697655	1
REXO2	1213.58	0.215302	0.14683	1.46634	0.142556	1
RBM7	359.314	0.350235	0.264291	1.32519	0.185109	1
RBMS2	262.047	0.136201	0.257333	0.529278	0.596612	1
BAZ2A	1993.85	-0.0506442	0.114639	-0.441769	0.658656	1
PTPN23	1808.45	-0.0657619	0.272247	-0.241552	0.809127	1
MLH1	632.589	-0.29616	0.202591	-1.46186	0.143779	1
UNG	968.877	-0.0852878	0.161509	-0.528068	0.597452	1
FMO4	41.4319	-0.41801	0.285617	-1.46353	0.143321	1
KLHL20	587.876	-0.0347493	0.279173	-0.124472	0.900941	1
RGS11	39.2134	0.356994	0.421419	0.847123	0.396926	1
SLC46A1	2595.85	-0.0770516	0.183538	-0.419813	0.674622	1
PLXNA2	52.7156	-0.948441	0.487582	-1.94519	0.0517516	1
SPAG5	1857.7	0.00392183	0.141941	0.02763	0.977957	1
ANKRD13A	246.304	0.480035	0.275984	1.73936	0.0819722	1
TPD52	3374.71	-0.250644	0.203567	-1.23126	0.218227	1
ACACB	226.717	0.0619451	0.247257	0.25053	0.802178	1
TRAF4	4987.4	0.0082791	0.232176	0.0356587	0.971555	1
PAG1	178.919	-0.414062	0.470711	-0.879652	0.379048	1
GPATCH1	8.75083	0.729184	1.10473	0.660054	0.509219	1
ICAM3	624.08	-0.0813533	0.293297	-0.277375	0.781492	1
NT5C2	1463.2	0.153944	0.278702	0.552361	0.580701	1
MCAM	9.91346	-0.548696	0.897632	-0.611271	0.54102	1
GPC4	300.126	-0.00959154	0.124755	-0.0768827	0.938717	1
MBNL3	156.411	0.0774996	0.355626	0.217924	0.827488	1
CAMSAP3	570.615	-0.133775	0.130113	-1.02814	0.303883	1
RAP1GAP	326.085	0.011056	0.226566	0.0487982	0.96108	1
XAB2	1573.46	-0.182277	0.235522	-0.773925	0.438975	1
ARHGEF1	296.058	0.235746	0.363535	0.648482	0.516674	1
STXBP2	1848.05	-0.0350734	0.210423	-0.16668	0.867621	1
MAP2K7	111.86	-0.268743	0.424302	-0.633376	0.526488	1
DGKD	16.7965	-0.0996366	0.868713	-0.114695	0.908687	1
CTTNBP2	6.32849	-1.12859	0.996304	-1.13278	0.257309	1
RARB	72.5445	-0.616044	0.28437	-2.16635	0.0302845	1
TOP2B	2043.83	0.12483	0.458846	0.272052	0.785582	1
TM9SF3	3347.28	-0.133645	0.367228	-0.363929	0.715911	1
NFKB2	829.528	-0.0843654	0.216701	-0.389317	0.697042	1
UBE2T	798.516	0.0131133	0.122722	0.106853	0.914905	1
PPP1R12B	465.282	0.190299	0.237529	0.801159	0.423039	1
DNAJC10	1074.13	0.200205	0.385983	0.518689	0.603977	1
GTF3C1	4850.62	-0.0873588	0.156342	-0.558765	0.576322	1
IL4R	156.568	0.163331	0.198268	0.82379	0.410059	1
USP33	999.37	0.0518371	0.400175	0.129536	0.896933	1
PAK3	16.0937	-0.53025	0.695545	-0.762352	0.44585	1
SNRPA	1760.78	0.0104327	0.275291	0.0378969	0.96977	1
EXOSC5	294.295	-0.0723585	0.244357	-0.296118	0.76714	1
DYNC1I2	1071.34	0.0694822	0.224567	0.309405	0.757013	1
LRCH4	1062.65	-0.0819787	0.215382	-0.380621	0.703484	1
FAM76B	147.721	0.11081	0.635469	0.174376	0.86157	1
SIRT6	618.307	0.0222643	0.223672	0.0995399	0.92071	1
POLD3	47.6435	-0.253265	0.357936	-0.707571	0.479212	1
CAPZB	2851.9	-0.077898	0.192256	-0.405178	0.685347	1
GPR137B	302.638	-0.0321241	0.147556	-0.217708	0.827657	1
NAALAD2	12.5326	0.734178	0.731163	1.00412	0.315319	1
JADE1	453.413	-0.160334	0.153237	-1.04631	0.295418	1
UBE2A	1664.8	-0.0398647	0.0876311	-0.454915	0.649171	1
FGFR1	374.959	0.191904	0.239038	0.802817	0.422081	1
FBLN1	15.5832	-0.634816	0.513091	-1.23724	0.215998	1
MAP2	93.3743	-0.520156	0.312593	-1.664	0.096112	1
PIAS2	866.167	0.0842089	0.139601	0.603212	0.546368	1
ARAF	1488.85	-0.0612832	0.276284	-0.221813	0.82446	1
MCCC1	1763.65	0.0245118	0.0904593	0.270971	0.786414	1
NEBL	214.634	0.0502489	0.304189	0.16519	0.868795	1
ACER3	349.611	0.470271	0.336963	1.39562	0.16283	1
UBE2K	2732.83	0.0172118	0.0926379	0.185796	0.852604	1
PIK3C3	604.62	0.078526	0.271549	0.289178	0.772445	1
N4BP2	139.858	0.413416	0.634306	0.651762	0.514555	1
TIGAR	339.172	-0.219863	0.28481	-0.771963	0.440137	1
TULP3	838.94	-0.149728	0.110692	-1.35265	0.176167	1
SYNJ2	74.9858	0.155437	0.311244	0.499406	0.617493	1
PPP2R5C	1867.67	0.146999	0.187872	0.782442	0.433955	1
GNB1	15136.3	-0.097131	0.107265	-0.905524	0.365188	1
MLLT10	326.001	0.0916417	0.225958	0.40557	0.685058	1
ZCWPW1	70.8944	0.19077	0.245984	0.775539	0.438021	1
NRDC	184.254	0.56333	0.439453	1.28189	0.199882	1
VDAC3	2439.34	0.0409141	0.108424	0.377354	0.705911	1
PCM1	937.896	0.200767	0.495409	0.405256	0.685289	1
TNRC6C	366.597	0.017753	0.225178	0.07884	0.93716	1
CBFA2T2	1870.91	0.20327	0.150976	1.34637	0.178183	1
ITCH	826.379	-0.045197	0.2781	-0.162521	0.870896	1
PKD2L2	9.42405	-0.253577	0.630634	-0.402098	0.687612	1
TP53INP2	827.615	-0.136662	0.173088	-0.789553	0.429789	1
SDF4	4664.58	-0.0263685	0.230375	-0.114459	0.908874	1
TP73	166.435	0.217393	0.297105	0.731705	0.464349	1
TOLLIP	2259.75	-0.10359	0.203166	-0.509878	0.610137	1
UBE2D4	952.953	-0.0503386	0.226394	-0.222349	0.824042	1
CLUL1	71.7327	-0.139611	0.317516	-0.439697	0.660157	1
THOC1	255.409	0.328935	0.373006	0.88185	0.377858	1
FKBP7	48.7486	-0.042626	0.4246	-0.100391	0.920034	1
OSBPL6	96.1013	0.568579	0.310554	1.83085	0.0671223	1
SLC1A3	22.7135	0.176979	0.740767	0.238913	0.811173	1
XRCC5	9288.51	-0.116533	0.104025	-1.12025	0.262609	1
MKNK1	359.992	0.158779	0.153202	1.0364	0.300014	1
TNS1	33.1622	-0.810378	0.616233	-1.31505	0.188493	1
REXO1	503.307	-0.0121056	0.18547	-0.0652699	0.947959	1
SAR1A	1990.91	0.0250314	0.114689	0.218255	0.82723	1
CDC14A	71.5934	0.228627	0.386121	0.592111	0.553776	1
RAPGEF3	79.0761	-0.0416806	0.321034	-0.129832	0.896699	1
CEACAM1	14.2113	0.220547	0.646952	0.340901	0.733178	1
SENP1	454.805	0.0344234	0.246894	0.139426	0.889114	1
CIC	1335.38	-0.107602	0.18599	-0.57854	0.562899	1
FDFT1	2662.49	-0.171402	0.176981	-0.968474	0.332808	1
PAFAH1B3	1118.3	-0.143758	0.264018	-0.544502	0.586096	1
OPHN1	360.701	-0.203894	0.309378	-0.659044	0.509867	1
CARMIL1	437.85	-0.376039	0.314466	-1.1958	0.231775	1
PGM1	1394.55	-0.0691183	0.215924	-0.320105	0.748889	1
DDX1	1687.24	0.0665101	0.22198	0.299623	0.764465	1
DNM2	3529.36	-0.0547986	0.152308	-0.359789	0.719005	1
EPB41L2	263.922	0.209052	0.203183	1.02889	0.303532	1
RIMS1	763.887	0.19319	0.281375	0.686592	0.49234	1
STX7	479.021	-0.0586848	0.26923	-0.217973	0.82745	1
RABL2B	477.53	-0.116045	0.140037	-0.82867	0.407291	1
KEAP1	2819.01	-0.0724125	0.148119	-0.488882	0.624925	1
DDX43	99.4551	0.480871	0.465192	1.0337	0.301274	1
SLC35C2	1183.96	-0.0788463	0.246921	-0.319318	0.749485	1
CRYBG3	241.787	-0.27825	0.463599	-0.600195	0.548377	1
EPHA6	165.622	-0.201134	0.200915	-1.00109	0.316783	1
RFX3	133.194	0.416864	0.368544	1.13111	0.258009	1
RIF1	253.191	0.0313423	0.507897	0.0617099	0.950794	1
RAB21	938.651	-0.00342147	0.260222	-0.0131483	0.989509	1
SLC4A4	1278.75	0.0418724	0.240571	0.174054	0.861823	1
SMARCA2	1018.64	0.105046	0.208327	0.504236	0.614096	1
SESN1	3236.52	0.322711	0.254558	1.26773	0.204895	1
MID2	387.525	0.0836451	0.146578	0.570653	0.568235	1
SRCAP	2739.25	-0.120163	0.196459	-0.611645	0.540773	1
PUM3	198.506	0.166858	0.347986	0.479496	0.631586	1
CHRNA3	18.2073	-0.121619	0.412757	-0.294651	0.768261	1
CNOT4	600.732	0.034564	0.139704	0.247409	0.804592	1
PSEN1	1857.79	-0.0542264	0.0992419	-0.546406	0.584787	1
CPOX	404.643	0.0292516	0.290648	0.100643	0.919834	1
CLDND1	646.872	0.0503092	0.256346	0.196255	0.844411	1
MOK	144.253	0.0120543	0.198943	0.0605916	0.951684	1
HSP90AA1	268.629	0.0202957	0.426322	0.0476064	0.96203	1
DLGAP4	1407.52	-0.119334	0.201049	-0.593559	0.552807	1
IGSF9B	16.0136	-2.33794	2.42052	-0.965885	0.334102	1
CROCCP3	13.6534	-1.25725	0.892332	-1.40895	0.158849	1
NDC80	482.145	0.0664171	0.319322	0.207994	0.835234	1
AP4E1	115.544	-0.171794	0.395571	-0.434295	0.664074	1
RSBN1	452.249	0.0681817	0.230059	0.296366	0.76695	1
MAGI3	508.738	0.158809	0.267513	0.59365	0.552746	1
TCF7	13.9464	0.659365	0.51952	1.26918	0.204376	1
OSTM1	474.399	0.0772682	0.46145	0.167446	0.867019	1
CDH7	5.37857	1.29451	0.957938	1.35135	0.176583	1
PCNP	690.366	0.205333	0.217139	0.945629	0.344338	1
EXD2	1267.88	0.0310048	0.101612	0.305129	0.760268	1
ARG2	2206.79	-0.125782	0.135639	-0.927326	0.353757	1
UBA5	630.166	0.203092	0.258045	0.787039	0.431259	1
STK17B	179.103	-0.63004	0.533946	-1.17997	0.238012	1
CDC14B	85.9288	-0.30967	0.670284	-0.461997	0.644083	1
ZNF510	272.205	0.171197	0.390456	0.438454	0.661057	1
ZNF506	146.448	0.0852544	0.328596	0.25945	0.795288	1
JMJD4	1162.23	-0.0361549	0.246196	-0.146854	0.883247	1
DUSP12	38.5216	-0.023633	0.579522	-0.0407801	0.967471	1
AACS	2324.18	-0.057266	0.161765	-0.354008	0.723333	1
DELE1	1652.9	0.00573496	0.116378	0.0492789	0.960697	1
CADPS2	361.652	-0.0412645	0.27575	-0.149644	0.881045	1
PCDHGA2	61.5762	-0.211958	0.259834	-0.815746	0.414646	1
HSPB11	400.164	0.101151	0.150812	0.670708	0.502406	1
PHLPP1	647.911	-0.0197145	0.104174	-0.189247	0.8499	1
ATP8B1	59.9417	0.65925	0.985669	0.668835	0.503601	1
SMARCD3	447.173	0.0321124	0.294068	0.1092	0.913044	1
WDR70	70.651	0.22828	1.03216	0.221168	0.824961	1
STRADB	1222.76	0.125618	0.106607	1.17832	0.238667	1
BZW1	4187.17	0.0649394	0.276807	0.234602	0.814518	1
C1QTNF3	32.9214	0.18789	0.596053	0.315224	0.752592	1
ME2	1336.06	0.0458543	0.220403	0.208048	0.835192	1
C5orf22	713.147	0.0212073	0.240196	0.0882915	0.929645	1
CCNT2	392.958	0.343162	0.446386	0.768754	0.442039	1
FAM135A	148.874	-0.0201207	0.561273	-0.0358483	0.971403	1
EPB41L3	9.57188	1.00145	0.837591	1.19563	0.231839	1
COBLL1	1048.32	0.0982947	0.36582	0.268697	0.788163	1
DLG3	1515.6	-0.0565819	0.190204	-0.29748	0.7661	1
TRAF5	17.2974	-0.745214	0.522762	-1.42553	0.154004	1
MRPL22	704.945	0.107089	0.131746	0.812839	0.416311	1
GEMIN5	851.929	0.0945949	0.135517	0.698028	0.48516	1
NFE2L1	6682.7	-0.0692569	0.09465	-0.731716	0.464342	1
GSK3B	512.562	-0.125618	0.171362	-0.733058	0.463523	1
ITGB5	1002.65	-0.0770804	0.196348	-0.392571	0.694636	1
ERC1	1103.58	0.0945894	0.135082	0.700234	0.483781	1
XPO1	542.516	-0.047465	0.289688	-0.163848	0.869851	1
RNF13	142.777	1.33366	0.550679	2.42185	0.0154417	1
PALB2	6.44827	0.127422	1.01409	0.125652	0.900008	1
DOP1A	242.416	0.309121	0.43473	0.711063	0.477045	1
LYRM2	450.515	0.146535	0.241243	0.607419	0.543573	1
BCKDHB	459.826	0.0174205	0.225969	0.0770925	0.93855	1
KAT6A	1184.25	-0.0725427	0.261124	-0.277809	0.781159	1
TUT7	562.316	-0.331851	0.374167	-0.886907	0.375129	1
ULK2	698.391	0.117495	0.175843	0.668181	0.504018	1
TNPO1	2680.75	0.144386	0.360043	0.401024	0.688402	1
PLOD1	4424.45	-0.0717954	0.270845	-0.265079	0.790949	1
P2RX5	52.0796	-0.218002	0.448195	-0.4864	0.626683	1
ITGAE	350.95	-0.044273	0.152299	-0.290697	0.771283	1
DIS3	217.942	0.241969	0.413128	0.585698	0.558078	1
PIBF1	17.3344	0.484608	0.591879	0.818762	0.412922	1
TDRD3	250.078	0.30565	0.341011	0.896306	0.37009	1
NUFIP1	211.275	-0.172014	0.162019	-1.06169	0.288376	1
PDS5B	843.149	-0.23035	0.384198	-0.599559	0.5488	1
OXCT1	2030.59	-0.014711	0.20587	-0.0714575	0.943034	1
RRAGB	6.9806	2.33754	1.17473	1.98985	0.0466075	1
CYLD	386.138	0.103927	0.298642	0.347998	0.727841	1
SLC27A5	513.493	-0.0177961	0.297005	-0.0599184	0.952221	1
ZNF324	370.486	-0.140192	0.21726	-0.645274	0.518749	1
ZNF671	162.56	-0.0646417	0.155395	-0.415984	0.677422	1
ZNF416	297.772	0.00209798	0.1908	0.0109957	0.991227	1
ZNF586	350.432	-0.125603	0.180317	-0.69657	0.486072	1
ZNF446	245.857	-0.0844221	0.199378	-0.423427	0.671983	1
ZNF264	464.337	0.0202241	0.151578	0.133424	0.893858	1
RPS5	24427.4	-0.0159464	0.278633	-0.057231	0.954361	1
FAT1	3019.64	-0.289884	0.198076	-1.46349	0.143332	1
CHMP2B	752.355	-0.0137054	0.30575	-0.0448254	0.964246	1
SMAP2	1662.8	0.0858195	0.14682	0.584523	0.558869	1
PPIE	139.835	0.218538	0.252692	0.86484	0.387126	1
ZMPSTE24	1870.54	0.0575252	0.28709	0.200373	0.841189	1
STARD7	3544.15	0.0745524	0.118733	0.6279	0.530069	1
NOA1	1779.32	0.0144588	0.11471	0.126047	0.899695	1
REST	221.532	1.02026	0.969569	1.05228	0.292672	1
SSH1	991.389	-0.0244915	0.118737	-0.206268	0.836582	1
APLP2	10708.8	-0.0482375	0.0927614	-0.520017	0.603052	1
FAM234B	573.956	-0.141255	0.141476	-0.998433	0.31807	1
WBP11	2518.22	0.013696	0.125186	0.109405	0.912881	1
EIF3I	8602.6	-0.0857189	0.224611	-0.381632	0.702734	1
NKAIN1	21.516	-0.49964	0.499306	-1.00067	0.316987	1
COL16A1	62.9175	-0.447879	0.414119	-1.08152	0.279465	1
TXLNA	2718.18	-0.0665108	0.0728118	-0.913462	0.361	1
NCOA1	1381.55	0.255274	0.267797	0.953235	0.340471	1
AGBL5	1436.96	-0.0567725	0.219531	-0.258608	0.795938	1
EFR3B	109.563	0.0718494	0.260513	0.275799	0.782702	1
KIF3C	270.502	-0.1507	0.226631	-0.664955	0.506079	1
RAB10	2748.86	0.0279079	0.199646	0.139787	0.888829	1
HADHA	7950.1	0.0202561	0.184098	0.110029	0.912387	1
MAPRE3	242.015	0.0248855	0.147828	0.16834	0.866316	1
CAD	2277.18	-0.0582523	0.234575	-0.248331	0.803878	1
CD59	1425.55	-0.0196833	0.0860234	-0.228813	0.819014	1
CD82	298.8	0.0671243	0.238128	0.281883	0.778033	1
BCORL1	355.103	-0.161955	0.185111	-0.874904	0.381626	1
ATRX	611.72	0.246019	0.473819	0.519226	0.603603	1
AK6	27.5392	-1.60582	1.48092	-1.08434	0.278213	1
MYNN	440.958	0.343001	0.464475	0.73847	0.460229	1
MECOM	31.4849	0.273175	0.566469	0.482242	0.629634	1
SCAMP1	1366.67	0.065286	0.325601	0.200509	0.841082	1
PREP	1617.85	-0.0620574	0.137433	-0.451546	0.651596	1
HACE1	165.835	-0.0727543	0.484495	-0.150165	0.880634	1
SEH1L	1360.49	0.157299	0.200169	0.785834	0.431965	1
WDR47	281.641	-0.0424097	0.435502	-0.097381	0.922424	1
WDFY1	615.961	0.145419	0.396762	0.366515	0.713981	1
OVGP1	5.67436	-0.693658	0.775891	-0.894015	0.371314	1
SLC25A24	233.841	0.138203	0.393478	0.351234	0.725413	1
MAP3K4	440.475	0.349783	0.274178	1.27575	0.202044	1
PILRA	2.43787	0.688087	1.31194	0.524479	0.599946	1
IGSF9	387.177	-0.0131372	0.216344	-0.0607234	0.951579	1
ZNF213	222.788	-0.341968	0.352323	-0.97061	0.331743	1
AKR1B1	3.22824	-0.529362	1.29398	-0.409095	0.68247	1
CPNE3	11674	0.0797573	0.260047	0.306703	0.75907	1
CTTN	2472.43	0.0376719	0.186173	0.202349	0.839644	1
MTIF2	94.9036	-0.104086	0.551012	-0.188899	0.850172	1
DDHD2	267.652	-0.240155	0.440094	-0.54569	0.585279	1
TTC39A	554.521	-0.0316327	0.235016	-0.134598	0.892929	1
EPS15	1478.21	-0.0721868	0.244784	-0.2949	0.76807	1
ORC1	358.012	-0.103741	0.220888	-0.469652	0.638604	1
MGST2	1858.38	-0.0121737	0.166283	-0.0732105	0.941639	1
CHERP	1953.15	-0.0329206	0.156778	-0.209982	0.833681	1
ATG16L1	472.509	0.0536392	0.131425	0.408135	0.683175	1
USP40	1364.37	-0.0433269	0.184072	-0.23538	0.813914	1
POMGNT1	4244.63	-0.0358551	0.262927	-0.136369	0.89153	1
RAD54L	422.567	0.0870773	0.225016	0.386982	0.698769	1
MAST2	864.663	0.11351	0.211744	0.536071	0.59191	1
DNAJA1	5434.31	-0.0845115	0.262059	-0.32249	0.747081	1
CHMP5	743.905	0.0636315	0.329559	0.193081	0.846896	1
NFX1	1630.47	-0.00923977	0.101902	-0.0906734	0.927752	1
AQP6	4.32861	0.86888	1.03784	0.837199	0.402481	1
DIMT1	1021.59	0.081933	0.0861691	0.95084	0.341686	1
IPO11	18.4432	0.644093	0.815131	0.790171	0.429428	1
FOLH1	30459.3	0.113742	0.153807	0.73951	0.459597	1
EIF2AK1	6610.21	-0.0591029	0.144281	-0.409636	0.682073	1
EPDR1	71.8208	0.165125	0.292237	0.565039	0.572047	1
SNX10	21.0142	-0.673109	1.0481	-0.64222	0.52073	1
SEPHS1	2395.32	0.051954	0.0995301	0.521993	0.601675	1
MRPL28	152.734	-0.107608	0.69113	-0.155698	0.876271	1
HBQ1	28.2233	0.245018	0.553543	0.442637	0.658029	1
ITPKC	448.014	-0.195472	0.173903	-1.12403	0.261001	1
FAT2	3.49009	0.289002	0.962895	0.300139	0.764071	1
RBM22	991.708	0.00521721	0.0796414	0.0655087	0.947769	1
TMED2	7356.82	-0.112203	0.117603	-0.95408	0.340043	1
ERO1B	2.58709	-3.19914	2.18941	-1.46119	0.143963	1
ZFAND6	809.335	0.0507893	0.238218	0.213205	0.831167	1
TXLNG	311.758	0.0557592	0.366276	0.152233	0.879003	1
PPEF1	3.39224	-0.000191463	1.19494	-0.000160229	0.999872	1
LAT2	28.0202	-0.634679	0.365983	-1.73418	0.0828864	1
HUWE1	9812.29	-0.136787	0.123913	-1.1039	0.269638	1
ZW10	705.604	0.0173768	0.205562	0.0845331	0.932633	1
ALG9	820.569	0.00908329	0.222604	0.0408047	0.967452	1
ACOX3	463.602	-0.206402	0.191971	-1.07518	0.282296	1
MTMR2	885.568	-0.212188	0.220082	-0.964133	0.334979	1
PPP1R15A	104.207	0.0919244	0.233391	0.393864	0.693682	1
HSD17B14	59.4635	0.269682	0.332339	0.811465	0.417099	1
TRIP6	32.7	0.294342	0.358719	0.820537	0.41191	1
ACHE	25.61	0.127206	0.431381	0.29488	0.768085	1
FTL	9878.27	-0.0105186	0.260183	-0.0404277	0.967752	1
SRRT	2928.2	0.0794086	0.134854	0.588848	0.555963	1
BAX	771.231	-0.0607471	0.263954	-0.230143	0.817981	1
NLK	309.653	0.120348	0.291025	0.41353	0.679218	1
PIGS	2616.35	-0.0864605	0.165945	-0.521018	0.602354	1
TMPRSS11E	15.0137	0.0970793	0.52688	0.184253	0.853815	1
ATXN7L3	1150.52	-0.113936	0.193703	-0.588201	0.556397	1
PGS1	399.452	0.0296987	0.136091	0.218227	0.827252	1
PSMC5	3639.62	-0.0490476	0.131193	-0.373859	0.70851	1
UIMC1	442.298	0.0406428	0.20232	0.200883	0.84079	1
MT3	10.5175	0.846621	1.20507	0.702549	0.482337	1
LPCAT2	43.2782	-0.100347	0.412172	-0.243459	0.80765	1
GNAO1	21.3626	-0.327309	0.665317	-0.49196	0.622748	1
OGFOD1	850.846	-0.303375	0.170666	-1.7776	0.0754704	1
SH3BP2	1032.43	-0.0229455	0.130956	-0.175215	0.86091	1
NOP14	2686.54	-0.00845535	0.159079	-0.053152	0.957611	1
ADD1	5273.49	-0.0932509	0.116497	-0.80046	0.423445	1
L2HGDH	383.97	0.266078	0.280559	0.948386	0.342933	1
TXNDC16	358.577	-0.216529	0.367127	-0.589793	0.555329	1
RTRAF	1663.74	0.0386146	0.152039	0.253977	0.799513	1
GMCL1	290.177	0.00384898	0.430122	0.00894858	0.99286	1
SF3B2	549.684	-0.0863014	0.154299	-0.559313	0.575948	1
KLHL42	1083.18	0.101916	0.256029	0.398064	0.690583	1
GNAS	35549.3	-0.0326354	0.192374	-0.169645	0.865289	1
DNM1L	1267.82	-0.296814	0.344038	-0.862736	0.388283	1
PTHLH	7.51807	-0.618516	0.84555	-0.731495	0.464477	1
ERGIC2	282.643	0.12749	0.523564	0.243505	0.807614	1
TFAP2C	430.259	-0.336627	0.143952	-2.33847	0.0193627	1
AURKA	837.234	-0.0434743	0.191574	-0.226932	0.820477	1
PIR	663.879	-0.0205774	0.126705	-0.162404	0.870988	1
AAMDC	183.595	0.0477125	0.175457	0.271932	0.785674	1
RFX2	159.613	0.0968607	0.255089	0.379714	0.704158	1
METTL2A	459.94	-0.0333832	0.202244	-0.165063	0.868894	1
ALG6	433.788	-0.0443351	0.143343	-0.309295	0.757097	1
CNOT3	1333.56	-0.17345	0.200163	-0.866546	0.386191	1
PTPN4	264.203	0.256456	0.417164	0.614761	0.538712	1
DDX18	941.197	0.0835084	0.283647	0.29441	0.768445	1
KHSRP	6415.43	-0.113111	0.182823	-0.618692	0.536119	1
GNA11	2663.71	-0.115997	0.147097	-0.788577	0.430359	1
ASAP3	302.933	0.310721	0.170669	1.8206	0.0686671	1
EDEM2	704.462	-0.176649	0.210188	-0.840434	0.400665	1
DNMT3B	156.605	-0.0261921	0.177537	-0.14753	0.882714	1
TPX2	2766.36	0.00251733	0.168229	0.0149637	0.988061	1
FER1L4	21.562	-0.410525	0.53339	-0.769653	0.441506	1
PDRG1	809.427	-0.0887754	0.137238	-0.64687	0.517716	1
EPB41L1	1346.54	-0.192102	0.153635	-1.25038	0.211161	1
DOCK9	511.321	-0.14439	0.279757	-0.516126	0.605766	1
ANKRD10	195.033	-0.0170797	0.326858	-0.0522543	0.958326	1
TGDS	96.8641	0.0422686	0.398481	0.106074	0.915524	1
DOCK3	94.5117	0.135914	0.271461	0.500675	0.6166	1
C3orf18	425.086	-0.0521529	0.259627	-0.200876	0.840795	1
COQ9	1997.04	-0.0607915	0.166088	-0.36602	0.71435	1
TMEM40	13.2919	1.06002	0.921475	1.15036	0.249998	1
KIF9	257.517	0.0407757	0.174318	0.233916	0.81505	1
ARHGAP28	143.659	-0.293408	0.368686	-0.795819	0.426137	1
CRLS1	535.347	-0.101621	0.139459	-0.72868	0.466197	1
PPP1R13B	285.428	0.283107	0.240852	1.17544	0.239818	1
ATRN	2080.71	0.0306432	0.102502	0.298953	0.764976	1
SMOX	169.219	-0.336721	0.219102	-1.53682	0.124337	1
FKBP1A	4666.58	-0.0485566	0.161197	-0.301226	0.763242	1
NSFL1C	2318.15	-0.0600443	0.223923	-0.268147	0.788586	1
SLC4A11	140.872	-0.388085	0.207359	-1.87157	0.0612666	1
C20orf194	142.668	0.0914128	0.23407	0.390536	0.69614	1
ZNF343	112.107	0.019293	0.444861	0.0433685	0.965408	1
EBF4	12.2118	-0.488201	0.774698	-0.630183	0.528575	1
MAVS	4240.1	-0.0999819	0.130377	-0.766866	0.443161	1
LZTS3	273.346	-0.0575082	0.16799	-0.342332	0.732101	1
XRN2	2764.9	0.0494744	0.160761	0.307751	0.758272	1
KIZ	223.672	0.18392	0.235374	0.781395	0.43457	1
DYNLL1	3902.73	0.00602236	0.213725	0.028178	0.97752	1
TESC	147.027	-0.0220025	0.312904	-0.0703169	0.943941	1
SNX5	1705.68	0.133233	0.186432	0.714648	0.474826	1
RPL6	35725.3	0.0314305	0.110452	0.284564	0.775978	1
MAPKAPK5	716.072	-0.0996305	0.127235	-0.783042	0.433603	1
P2RX7	33.8198	-0.163205	0.36507	-0.44705	0.654839	1
ESF1	82.1521	0.618611	0.513784	1.20403	0.228578	1
RBBP9	918.876	0.0597325	0.223399	0.26738	0.789177	1
ANAPC5	5153.19	0.0479624	0.121348	0.395247	0.692661	1
SLC23A2	389.536	-0.0215575	0.234543	-0.091913	0.926767	1
SLC8B1	485.756	0.0402345	0.195294	0.20602	0.836775	1
TMEM230	3274.14	-0.051513	0.121152	-0.425194	0.670695	1
DZANK1	40.5001	0.109694	0.308931	0.355076	0.722533	1
KDM2B	829.884	-0.121738	0.253442	-0.480338	0.630987	1
CFAP61	10.5094	0.273004	0.666409	0.409664	0.682052	1
TASP1	186.214	-0.103267	0.306161	-0.337297	0.735893	1
OAS1	20.3208	0.0774717	0.493902	0.156856	0.875358	1
GCN1	6484.04	-0.0784868	0.192101	-0.408569	0.682856	1
RPLP0	111395	-0.0369515	0.242404	-0.152438	0.878841	1
PXN	3295.64	-0.111612	0.168393	-0.662808	0.507453	1
SIRT4	15.6793	0.450638	0.424544	1.06146	0.288479	1
KIF16B	62.2789	-0.0117126	0.467479	-0.0250549	0.980011	1
TRMT6	319.827	-0.115798	0.210369	-0.55045	0.58201	1
PEBP1	11321	-0.035776	0.123576	-0.289505	0.772195	1
BRAP	485.271	0.0066708	0.155261	0.0429651	0.965729	1
ERP29	3664.18	-0.0196982	0.181991	-0.108237	0.913808	1
FUS	5307.03	-0.142765	0.19698	-0.724772	0.468592	1
IGBP1	1971.84	-0.0171885	0.213515	-0.0805026	0.935838	1
ZNF302	222.331	0.364082	0.548389	0.663911	0.506747	1
GRAMD1A	2170.81	-0.0966229	0.209619	-0.460946	0.644838	1
FXYD3	662.855	-0.0275887	0.209746	-0.131534	0.895353	1
HEPH	7.11136	-0.860757	0.815136	-1.05597	0.290983	1
CDIP1	834.549	0.0266896	0.366771	0.0727693	0.94199	1
CMTM1	6.25517	-0.713316	0.82746	-0.862055	0.388657	1
GANAB	15339.6	-0.0334025	0.197538	-0.169094	0.865723	1
GMIP	580.736	-0.0624196	0.208371	-0.29956	0.764513	1
RBM41	100.167	0.408217	0.354985	1.14996	0.250162	1
BIRC5	2215.59	-0.0608144	0.212456	-0.286244	0.774691	1
LAG3	7.29677	1.39595	0.771411	1.80961	0.0703563	1
MLF2	9074.04	-0.01321	0.199901	-0.0660825	0.947312	1
OTUB2	245.875	0.00193109	0.213994	0.00902407	0.9928	1
DDX24	1243.31	-0.463314	0.314204	-1.47457	0.140329	1
ZBTB25	183.023	-0.0199401	0.219898	-0.0906789	0.927748	1
NECAP1	2214.31	-0.0746473	0.13882	-0.537729	0.590764	1
ARHGAP4	25.2349	-0.582848	0.465221	-1.25284	0.210264	1
ANKRD24	116.882	-0.164762	0.260965	-0.631356	0.527808	1
DHX32	68.3085	0.0310523	0.249925	0.124247	0.90112	1
RCOR1	1449.44	-0.0171137	0.212307	-0.0806083	0.935753	1
GPATCH2L	164.407	-0.317713	0.332737	-0.954846	0.339656	1
LTBP4	607.675	0.0296003	0.188047	0.157409	0.874923	1
BLVRB	51.1318	-0.000931908	0.338416	-0.00275374	0.997803	1
SLC9A1	1642.72	0.0554489	0.211929	0.261639	0.7936	1
SPTLC1	1048.53	-0.028927	0.181308	-0.159546	0.873238	1
PAPOLA	2956.69	0.0285485	0.214172	0.133297	0.893959	1
CCNK	1604.56	0.0108913	0.154098	0.0706782	0.943654	1
PCBP4	648.012	0.0143866	0.208087	0.0691377	0.94488	1
YPEL3	258.175	-0.0563923	0.246566	-0.22871	0.819094	1
MRPS33	1190.66	0.0642492	0.0962939	0.66722	0.504632	1
NDUFB2	1701.6	0.0221395	0.151289	0.14634	0.883653	1
NUDC	3670.16	-0.0202627	0.189833	-0.10674	0.914996	1
MAEA	1775.18	-0.139228	0.159282	-0.874098	0.382065	1
STRN4	1421.05	-0.114821	0.191918	-0.59828	0.549653	1
SI	54.8689	-0.1662	0.744106	-0.223355	0.823259	1
MUL1	756.361	-0.00164905	0.204917	-0.0080474	0.993579	1
TFAP4	541.162	0.0836434	0.257496	0.324834	0.745307	1
PDCD7	530.387	-0.326417	0.159695	-2.04401	0.0409525	1
SPG21	2792.35	-0.0124968	0.178562	-0.0699861	0.944205	1
DNAJB11	1456.57	-0.0205578	0.161177	-0.127548	0.898507	1
P3H2	88.4626	0.0706839	0.251972	0.280523	0.779076	1
THPO	4.3134	0.543602	0.971801	0.559376	0.575905	1
CHRD	12.6245	0.934538	0.604565	1.5458	0.122153	1
FLT3LG	3.18683	-2.46157	1.26253	-1.94971	0.0512102	1
RAB11FIP3	768.517	-0.0821574	0.136914	-0.600066	0.548462	1
GNPTG	670.324	0.0610205	0.145179	0.420313	0.674257	1
ZNF268	201.44	0.23485	0.388109	0.605115	0.545103	1
GOLGA3	2085.73	-0.17903	0.144624	-1.2379	0.215753	1
PABPC4	3892.11	-0.0416177	0.143276	-0.290473	0.771455	1
CERS4	2444.66	0.037787	0.238987	0.158113	0.874367	1
MCOLN1	361.642	-0.0235608	0.188468	-0.125012	0.900514	1
USP48	204.979	0.266911	0.345889	0.771667	0.440311	1
EFNB1	287.539	-0.211149	0.160036	-1.31938	0.187041	1
PDPR	30.2123	0.243185	1.00503	0.241968	0.808805	1
GLG1	579.774	0.123361	0.186355	0.66197	0.507991	1
KIF4A	957.992	0.0340805	0.206831	0.164775	0.869121	1
TNRC6A	950.404	0.151435	0.347843	0.435354	0.663305	1
PLEKHG2	150.156	0.365305	0.408453	0.894364	0.371127	1
DLL3	74.4557	-0.143174	0.280856	-0.509777	0.610208	1
NAT14	510.373	-0.0597786	0.194767	-0.306924	0.758901	1
PITPNM2	230.278	-0.130431	0.156744	-0.832131	0.405335	1
EXOC1	456.299	-0.00407879	0.325866	-0.0125168	0.990013	1
RBM27	376.551	0.0786347	0.437815	0.179607	0.857461	1
OSBPL8	745.993	0.145181	0.519149	0.279652	0.779745	1
DTX2	365.123	-0.14747	0.23431	-0.629378	0.529101	1
PUS7	316.315	0.177649	0.334134	0.53167	0.594955	1
LAMB4	6.47955	0.621822	1.12936	0.550595	0.581911	1
NRCAM	3.37286	-0.768192	1.2152	-0.632152	0.527287	1
LAMB1	82.8317	-0.605596	0.366187	-1.65379	0.0981706	1
DLD	2300.59	0.0668978	0.283895	0.235642	0.81371	1
WDR7	960.898	0.0326516	0.223625	0.14601	0.883913	1
TXNL1	2172.82	-0.0134015	0.129255	-0.103683	0.917421	1
ABCC6	24.437	0.380344	0.525146	0.724265	0.468903	1
CMTM6	1367.34	0.0633876	0.385755	0.164321	0.869479	1
ITGA6	718.981	0.0305894	0.244515	0.125102	0.900443	1
RAPGEF4	21.3941	-0.170236	0.705928	-0.241153	0.809437	1
MAP3K20	338.398	0.0462361	0.276601	0.167158	0.867246	1
SEL1L3	3040.58	0.0109142	0.0799958	0.136435	0.891478	1
TF	11.1523	-0.288066	1.00435	-0.286819	0.774251	1
CDV3	1665.43	0.0027741	0.189174	0.0146643	0.9883	1
MYO15A	3.71906	-2.50986	1.74427	-1.43892	0.150173	1
ALKBH5	3424.39	-0.0633575	0.115086	-0.550522	0.581961	1
PITPNM3	59.9913	0.178878	0.312135	0.573078	0.566592	1
SPAG7	985.195	-0.0289389	0.0909605	-0.318148	0.750373	1
ORC6	270.315	0.103657	0.217466	0.476659	0.633605	1
ZFHX4	5.91323	0.0747056	1.92576	0.0387928	0.969056	1
ZC3HC1	48.5958	0.489024	0.544016	0.898914	0.368698	1
RGS17	31.858	0.465527	0.451682	1.03065	0.302704	1
ANGPT2	14.0945	-0.767613	0.685892	-1.11915	0.263078	1
TMEM101	493.819	-0.0347278	0.196321	-0.176893	0.859593	1
CD200	2.71271	0.275633	1.34516	0.204908	0.837644	1
CCDC80	22.2087	0.144794	0.707382	0.20469	0.837814	1
PSME1	2889.32	0.0131676	0.220886	0.0596128	0.952464	1
PPP2R3C	348.282	0.0513897	0.192419	0.267072	0.789413	1
HAUS4	1138.93	-0.0224184	0.205282	-0.109208	0.913038	1
SLC7A8	2217.13	-0.071332	0.210168	-0.339405	0.734304	1
OSGEP	413.693	0.0909578	0.194043	0.468751	0.639247	1
SLC22A17	531.807	-0.167013	0.204248	-0.817697	0.41353	1
RNF31	1076.45	-0.114487	0.155945	-0.734148	0.462859	1
SCFD1	460.314	0.620027	0.408992	1.51599	0.129522	1
G2E3	349.49	0.0428009	0.483992	0.088433	0.929533	1
HECTD1	2969.01	0.213532	0.380864	0.560651	0.575036	1
HNRNPC	10815.7	-0.0205876	0.0875897	-0.235046	0.814173	1
RPGRIP1	7.04301	-0.55251	0.854226	-0.646796	0.517764	1
SUPT16H	2445.96	0.0471152	0.287177	0.164063	0.869681	1
TOX4	2091.6	-0.0794404	0.191517	-0.414795	0.678292	1
GEMIN2	132.249	0.248036	0.484091	0.512375	0.608389	1
TGM1	30.0575	0.129131	0.544723	0.237057	0.812612	1
TINF2	1415.43	-0.0864545	0.179561	-0.481478	0.630177	1
TBL1Y	21.5676	-1.51145	1.47845	-1.02232	0.30663	1
SEMA6A	178.7	0.342926	0.269675	1.27163	0.203505	1
TRPM7	653.043	0.0201111	0.462826	0.0434529	0.96534	1
TYRO3	561.392	0.21277	0.233473	0.911329	0.362122	1
WDR76	160.297	-0.012582	0.187128	-0.0672373	0.946393	1
SNAP23	843.601	-0.0428186	0.233566	-0.183325	0.854543	1
PHGDH	13965.9	-0.104168	0.366403	-0.2843	0.776181	1
COL9A3	38.0534	0.303745	0.315995	0.961235	0.336434	1
MYL6	10714.9	-0.0240662	0.187437	-0.128396	0.897836	1
AGO1	1692.82	-0.0925637	0.109128	-0.848212	0.39632	1
CLSPN	160.97	-0.0602208	0.425051	-0.141679	0.887334	1
RFFL	252.823	-0.655323	0.329421	-1.98932	0.0466663	1
MFSD11	737.667	-0.0281837	0.116511	-0.241898	0.808859	1
DPYSL2	463.849	0.100447	0.210588	0.476984	0.633373	1
GPATCH2	317.258	0.362832	0.358285	1.01269	0.311208	1
NUP50	1296.07	0.198172	0.221314	0.895431	0.370557	1
CDC45	20.2173	1.26102	0.677409	1.86153	0.0626687	1
COMT	3833.12	0.0395886	0.184834	0.214184	0.830403	1
ADA2	33.7548	0.269846	0.418449	0.644872	0.51901	1
ECHDC1	16.8797	0.254812	0.60182	0.423402	0.672002	1
SEC22C	1722.74	-0.0665682	0.120953	-0.550364	0.58207	1
XYLB	66.4277	0.121125	0.312441	0.387673	0.698258	1
HDAC6	1193.85	-0.187853	0.162096	-1.1589	0.246496	1
CDC6	900.13	0.0725886	0.204683	0.354639	0.72286	1
UPRT	368.119	0.0467594	0.19103	0.244775	0.80663	1
CDC23	1189.27	-0.127461	0.140306	-0.908449	0.363641	1
AAAS	1667.42	-0.0245806	0.252376	-0.0973966	0.922411	1
CBX5	2927.49	0.0927798	0.175315	0.529219	0.596654	1
SUCO	956.015	0.0409277	0.497637	0.082244	0.934453	1
MSH2	224.292	-0.0937607	0.207027	-0.452891	0.650627	1
MAP3K1	245.402	0.0655713	0.346095	0.18946	0.849732	1
DHPS	1722.73	-0.066479	0.25141	-0.264425	0.791452	1
HOOK2	1102.62	-0.0545839	0.168344	-0.32424	0.745756	1
ARCN1	4730.52	-0.023677	0.140442	-0.168588	0.86612	1
EPB41L4B	1971.27	-0.0261465	0.253601	-0.103101	0.917883	1
TMEM38B	690.183	0.0164467	0.274913	0.0598251	0.952295	1
PSMD5	445.932	-0.139383	0.152328	-0.915017	0.360183	1
PTGS1	8.56524	-0.744143	0.805504	-0.923823	0.355578	1
NUP188	3392.17	-0.0914653	0.176047	-0.519551	0.603377	1
CRAT	3032.54	0.0148389	0.262304	0.0565714	0.954887	1
SH2D3C	6.00361	0.781652	1.05421	0.74146	0.458415	1
NANS	2236.03	-0.104681	0.182386	-0.573952	0.566	1
TBC1D2	155.789	-0.0342419	0.229499	-0.149202	0.881394	1
CWF19L1	372.271	-0.0928244	0.177889	-0.52181	0.601803	1
SEMA4G	74.354	-0.0102409	0.444041	-0.0230629	0.9816	1
BTAF1	910.438	-0.0568955	0.379	-0.15012	0.88067	1
IKZF5	9.17814	-0.351832	0.803777	-0.437724	0.661587	1
BLNK	87.6805	0.438254	0.286319	1.53065	0.125856	1
TLL2	83.6841	-0.30854	0.258579	-1.19321	0.232786	1
TDRD1	6.83902	0.480065	0.89181	0.538304	0.590367	1
SORBS1	146.082	-0.0918885	0.203171	-0.452273	0.651072	1
IL11	16.1479	0.0292793	0.500974	0.0584448	0.953394	1
WAC	947.123	0.19229	0.342806	0.56093	0.574845	1
CREM	279.103	0.094895	0.125247	0.757666	0.448651	1
NUBP2	1655.52	-0.0104298	0.289749	-0.0359958	0.971286	1
HIVEP1	564.633	-0.0385144	0.320162	-0.120296	0.904248	1
CRISP3	11.326	0.25778	0.566668	0.454905	0.649178	1
FKBP5	49.5635	-1.2956	0.870525	-1.4883	0.136673	1
SRPK1	1185.68	-0.017578	0.255728	-0.0687373	0.945199	1
BRPF3	1356.56	-0.151431	0.135038	-1.1214	0.26212	1
MRPS18A	1180.78	-0.310798	0.231053	-1.34514	0.17858	1
TMEM14A	597.192	0.121571	0.148636	0.817911	0.413408	1
EFHC1	191.412	0.171708	0.373709	0.45947	0.645897	1
HSP90AB1	58981.9	-0.0406577	0.163188	-0.249147	0.803247	1
CDC5L	798.597	-0.0592751	0.376688	-0.157359	0.874962	1
ITPR3	1254.62	-0.113679	0.192584	-0.590283	0.555001	1
ZNF184	143.522	0.0905603	0.415182	0.218122	0.827334	1
DSP	4456.61	-0.0705844	0.179844	-0.392475	0.694707	1
SIRT1	502.395	0.0227082	0.34766	0.0653172	0.947921	1
HNRNPH3	1147.8	0.00295372	0.216627	0.013635	0.989121	1
IFT74	153.499	-0.0188781	0.526962	-0.0358244	0.971422	1
JAK2	10.8065	1.71246	1.28965	1.32785	0.184229	1
ABL1	2011.53	-0.0318209	0.105839	-0.300654	0.763678	1
ACOT7	1350.24	-0.193334	0.265878	-0.727152	0.467133	1
SH3GLB1	579.495	0.00264044	0.122322	0.0215859	0.982778	1
CDC7	272.084	0.0978275	0.37056	0.263999	0.791781	1
SYDE2	11.8696	-0.0306179	0.850565	-0.0359972	0.971285	1
PCSK5	5.60081	-1.15151	0.841497	-1.36841	0.171185	1
SCD	16819.9	-0.0458338	0.130548	-0.351086	0.725524	1
TMED1	1401.47	-0.184761	0.249102	-0.741705	0.458266	1
ABLIM1	1650.64	0.100515	0.158671	0.633482	0.526419	1
ERMP1	989.739	0.00216046	0.137411	0.0157226	0.987456	1
RAB18	288.504	0.189698	0.276154	0.686929	0.492127	1
NRP1	6225.79	0.118928	0.126828	0.937709	0.348394	1
HSD17B7P2	30.979	0.315775	0.453274	0.696654	0.486019	1
PALMD	145.23	0.129752	0.256052	0.506742	0.612336	1
TSPAN15	626.82	0.194684	0.197313	0.986676	0.323801	1
MACROH2A2	1342.12	0.0502218	0.152602	0.329104	0.742077	1
WASHC2A	1611.65	0.061894	0.147171	0.420558	0.674078	1
MAST3	668.712	-0.0357184	0.166413	-0.214636	0.830051	1
MZF1	496.94	-0.0519201	0.22613	-0.229602	0.818401	1
OCEL1	446.379	-0.00677954	0.26772	-0.0253233	0.979797	1
MYO9B	1235.4	-0.171772	0.214257	-0.80171	0.422721	1
KCNK6	9.08869	1.14988	1.04532	1.10002	0.271323	1
CATSPERG	35.8856	0.313587	0.400998	0.782017	0.434205	1
PSMD8	6649.77	-0.186802	0.208065	-0.897804	0.36929	1
FBXL19	167.69	-0.167976	0.276797	-0.606856	0.543946	1
STX1B	3.31215	-0.217032	1.24921	-0.173736	0.862073	1
HSD3B7	952.337	-0.0604021	0.251059	-0.240589	0.809874	1
SETD1A	840.862	-0.091271	0.204369	-0.4466	0.655164	1
BCL7C	814.193	-0.0268196	0.204679	-0.131032	0.89575	1
EFNA2	7.51961	0.194558	0.670009	0.290382	0.771524	1
CIRBP	6003.1	0.107608	0.133006	0.809044	0.41849	1
ATP5F1D	4486.39	0.0241617	0.283805	0.0851349	0.932154	1
CBARP	42.5989	0.19397	0.3828	0.506712	0.612357	1
PCDH11Y	170.622	0.166448	0.234042	0.711192	0.476965	1
HNRNPM	7408.48	-0.0951472	0.074987	-1.26885	0.204495	1
MARCHF2	771.766	-0.102541	0.240577	-0.426228	0.669942	1
NDUFB7	1690.26	0.0152742	0.288341	0.0529728	0.957754	1
TECR	3549.23	-0.0981875	0.284758	-0.34481	0.730237	1
TIMM13	2817.53	0.00334621	0.202983	0.0164852	0.986847	1
CDC34	1198.99	-0.00300188	0.24128	-0.0124415	0.990073	1
MTAP	794.182	0.147223	0.17451	0.843635	0.398874	1
CEP170B	1798.6	-0.00754069	0.134402	-0.0561054	0.955258	1
POLR2E	5570.44	-0.0688138	0.267928	-0.256837	0.797305	1
POLRMT	1643.02	-0.0751627	0.216168	-0.347705	0.728061	1
HCN2	92.7366	-0.192284	0.338871	-0.567426	0.570425	1
IZUMO4	25.9213	0.0155124	0.497351	0.03119	0.975118	1
RASSF7	560.183	0.0120487	0.190728	0.0631724	0.949629	1
GADD45B	71.3298	0.0188202	0.301609	0.0623991	0.950245	1
PALM	60.0544	-0.107922	0.391811	-0.275444	0.782975	1
MADCAM1	20.9362	0.400525	0.480459	0.83363	0.40449	1
MKNK2	6992.04	-0.047901	0.148352	-0.322888	0.74678	1
ARVCF	1043.43	-0.0584478	0.125956	-0.464035	0.642623	1
TRMT2A	630.025	0.23352	0.226352	1.03167	0.302227	1
RANBP1	2444.33	-0.0248729	0.130383	-0.190768	0.848708	1
ZDHHC8	232.822	-0.0985737	0.196359	-0.502008	0.615662	1
KLHL22	570.105	-0.0835893	0.221818	-0.376837	0.706295	1
MED15	929.101	-0.124417	0.166743	-0.746162	0.45557	1
SERPIND1	12.4199	0.669851	0.554349	1.20836	0.22691	1
SNAP29	1189.51	-0.0390896	0.129462	-0.301939	0.762699	1
CRKL	1312.06	-0.141832	0.113483	-1.24981	0.211371	1
LZTR1	811.129	-0.0607993	0.15184	-0.400417	0.688849	1
MMP11	89.953	0.461417	0.529359	0.871653	0.383398	1
CECR2	34.095	0.282713	0.374098	0.755719	0.449818	1
SMARCB1	166.98	0.234344	0.42718	0.548584	0.583291	1
BCL2L13	1344.79	0.0443593	0.132706	0.334267	0.738178	1
DDT	87.3918	0.123545	1.64008	0.0753288	0.939953	1
GSTT2	9.71645	-1.68864	1.08073	-1.5625	0.11817	1
CABIN1	1820.49	-0.133661	0.201541	-0.663197	0.507205	1
TBC1D10A	30.4854	-0.304921	0.468616	-0.650683	0.515251	1
SUSD2	55.4821	-0.0327801	0.446532	-0.0734102	0.94148	1
SF3A1	5068.89	-0.159579	0.258695	-0.616862	0.537326	1
RNF215	138.802	0.456182	0.422988	1.07847	0.280822	1
SEC14L2	238.186	-0.275126	0.348642	-0.789135	0.430033	1
SPECC1L	2813.3	-0.103615	0.176478	-0.587127	0.557118	1
PPIL2	1338.47	-0.0527398	0.137802	-0.382722	0.701926	1
YPEL1	118.794	0.605331	0.33818	1.78996	0.0734595	1
SNRPD3	2211.68	-0.240876	0.169584	-1.4204	0.155492	1
PES1	2582.57	-0.0325198	0.22204	-0.146459	0.883559	1
MAPK1	394.431	0.0537225	0.133621	0.40205	0.687647	1
GGT1	135.132	-0.107419	0.28069	-0.382696	0.701945	1
PRODH	5.34288	-0.172682	1.05755	-0.163284	0.870295	1
PPM1F	660.597	-0.135981	0.161913	-0.839842	0.400997	1
SLC35E4	92.3223	-0.137469	0.311069	-0.441923	0.658545	1
TOP3B	92.6074	0.22757	0.494751	0.459969	0.645538	1
ESS2	493.228	-0.104967	0.229104	-0.458164	0.646835	1
CRYBB2P1	132.017	0.389763	0.246074	1.58393	0.113211	1
CARD10	120.761	-0.0176562	0.199726	-0.088402	0.929557	1
LRP5L	49.3844	0.836607	0.356104	2.34933	0.0188071	1
SLC25A1	3315.55	-0.077056	0.260879	-0.295371	0.767711	1
GRK3	324.26	-0.0312266	0.244044	-0.127955	0.898185	1
GGA1	1065.2	-0.0789652	0.192829	-0.409508	0.682167	1
HIRA	1182.48	-0.024719	0.117854	-0.209741	0.83387	1
SH3BP1	33.9836	0.618655	0.626073	0.988152	0.323078	1
LGALS1	13.279	-0.426628	0.678631	-0.62866	0.529571	1
HPS4	805.011	-0.0577763	0.086198	-0.670274	0.502683	1
PIK3IP1	17.6261	-0.4816	0.826432	-0.582746	0.560064	1
SRRD	644.048	-0.0639374	0.267069	-0.239404	0.810793	1
PATZ1	1852.47	0.113917	0.17305	0.658291	0.510351	1
TRIOBP	744.818	-0.123018	0.149174	-0.824663	0.409563	1
TFIP11	752.432	-0.116897	0.153144	-0.763313	0.445277	1
GCAT	236.696	-0.209205	0.362912	-0.576463	0.564303	1
ANKRD54	772.982	0.0400798	0.176363	0.227257	0.820224	1
EIF3L	10002.1	-0.0201415	0.178595	-0.112778	0.910207	1
SNU13	2637.44	-0.0797997	0.229913	-0.347086	0.728526	1
MICALL1	1041.25	-0.221391	0.2252	-0.983086	0.325565	1
POLR2F	899.337	-0.0173187	0.206426	-0.0838976	0.933138	1
CCDC134	75.3756	0.280203	0.226147	1.23903	0.215333	1
DEPDC5	286.434	-0.170664	0.167638	-1.01805	0.308656	1
PICK1	911.457	-0.164511	0.207399	-0.793211	0.427655	1
TTC28	212.755	0.487482	0.220899	2.20681	0.0273276	1
CENPM	398.076	0.0840316	0.285283	0.294556	0.768333	1
SEPTIN3	1390.93	0.0428361	0.157398	0.272152	0.785505	1
KDELR3	82.0877	-0.051284	0.214386	-0.239214	0.81094	1
DDX17	4687.12	-0.0338535	0.277979	-0.121785	0.90307	1
DMC1	3.11373	3.16631	2.57226	1.23095	0.218342	1
TCF20	475.533	0.0911748	0.210234	0.433682	0.664519	1
HSCB	124.919	0.046669	0.192395	0.242568	0.80834	1
CBY1	818.777	-0.0383179	0.18426	-0.207956	0.835264	1
TOMM22	2011.82	-0.0567384	0.194431	-0.291818	0.770426	1
XBP1	4941.48	0.0552105	0.183291	0.301217	0.763249	1
RTCB	2204.47	-0.088754	0.129744	-0.684069	0.493932	1
JOSD1	1626.23	-0.152051	0.130935	-1.16127	0.245532	1
FBXO7	1690.23	0.0304027	0.137293	0.221444	0.824747	1
GTPBP1	1737.05	-0.0615174	0.169664	-0.362584	0.716915	1
POLDIP3	3930.68	-0.0180311	0.203725	-0.0885074	0.929473	1
RAB36	353.486	-0.104785	0.231529	-0.45258	0.650851	1
PPP6R2	1418.02	-0.131855	0.134469	-0.980562	0.326809	1
SBF1	2770.38	-0.0795228	0.171348	-0.464102	0.642575	1
SUN2	2152.92	-0.0723777	0.134669	-0.537449	0.590958	1
CYB5R3	3340.73	-0.0714839	0.254448	-0.280937	0.778759	1
DNAL4	774.899	-0.143679	0.194672	-0.738057	0.46048	1
LMF2	1190.1	-0.0638206	0.222359	-0.287016	0.7741	1
RHBDD3	770.874	-0.121352	0.153187	-0.792187	0.428252	1
[truncated: 13,866 more rows]

## Sheet: VPC220010vsDHT
GeneName	baseMean	log2FoldChange	lfcSE	stat	pvalue	padj
NCAPD3	203.667	-1.27371	0.183137	-6.95494	3.527e-12	5.15506e-08
CYP2U1	805.698	-0.846551	0.13169	-6.42837	1.28977e-10	9.42562e-07
ERRFI1	959.881	-1.04417	0.169648	-6.15491	7.51181e-10	3.65976e-06
TMPRSS2	8326.68	-0.628016	0.108014	-5.81419	6.09265e-09	2.22626e-05
GADD45G	273.027	-0.996033	0.173185	-5.75128	8.85699e-09	2.58908e-05
SGK1	280.321	-1.619	0.300465	-5.38832	7.11196e-08	0.000173247
ABCF1	104.435	-1.5886	0.29798	-5.33123	9.75509e-08	0.000203686
AC008012.1	40.5682	22.0667	4.22342	5.22485	1.743e-07	0.000318447
SLC41A1	2400.82	-0.611363	0.118154	-5.17429	2.28782e-07	0.000371542
FOSL2	1342.94	-0.527127	0.107566	-4.9005	9.55914e-07	0.00139716
CHKA	831.442	-0.391769	0.0805002	-4.86669	1.13484e-06	0.00150789
MAF	683.75	-1.08871	0.238464	-4.56552	4.98247e-06	0.00606864
IL17RA	114.876	-1.31859	0.291594	-4.52201	6.12558e-06	0.00688703
TNFAIP3	63.9313	-1.56795	0.353817	-4.43152	9.35707e-06	0.00911753
TNFRSF10B	3152.09	-0.447461	0.100675	-4.4446	8.80549e-06	0.00911753
TSC22D1	5266.78	-0.40468	0.0940088	-4.30471	1.67205e-05	0.0152742
TIPARP	318.02	-1.26232	0.303136	-4.16422	3.12424e-05	0.0253688
SPECC1L-ADORA2A	18.5229	-7.75516	1.85816	-4.17358	2.99854e-05	0.0253688
BAMBI	687.234	0.513986	0.128928	3.98662	6.70222e-05	0.0497654
NPPC	20.144	-1.85928	0.466823	-3.98284	6.80971e-05	0.0497654
NKX3-1	16393	-0.565854	0.144164	-3.92508	8.67024e-05	0.0603449
WIPI1	220.365	-0.646224	0.167047	-3.86851	0.000109503	0.0695866
NBAS	747.193	-0.462041	0.119156	-3.87762	0.000105482	0.0695866
CENPN	2790.6	-0.620083	0.161503	-3.83944	0.000123313	0.0720936
AL441992.2	15.103	3.25043	0.845099	3.84622	0.000119956	0.0720936
TMCC3	83	-1.36164	0.357754	-3.80607	0.000141192	0.0793714
NDUFAF4	437.324	0.471114	0.12518	3.7635	0.000167552	0.0907016
NSMAF	758.252	-0.47698	0.12739	-3.74426	0.000180925	0.0944426
SLC16A6	179.318	-1.11695	0.301412	-3.70571	0.000210799	0.0982255
TWIST1	339.238	-0.495213	0.134567	-3.68004	0.000233197	0.0982255
HERC2	25.8763	1.6826	0.456958	3.68218	0.000231249	0.0982255
LRCH1	357.855	-0.76714	0.206867	-3.70838	0.000208588	0.0982255
IGF1R	1012.91	-0.569168	0.154756	-3.67784	0.000235214	0.0982255
PPFIBP2	838.203	-0.448803	0.121142	-3.70476	0.000211588	0.0982255
TLCD2	74.996	9.41883	2.55195	3.69084	0.000223518	0.0982255
IL6R	973.734	-0.481405	0.132646	-3.62926	0.000284237	0.112281
AC010323.1	114.232	-10.2697	2.82858	-3.63071	0.000282639	0.112281
DCTN4	57.4557	-1.92331	0.542114	-3.54779	0.000388482	0.149422
AVL9	1278.01	-0.58888	0.167543	-3.5148	0.00044009	0.156887
ASIC1	27.4565	2.04268	0.580776	3.51715	0.000436207	0.156887
APCDD1	93.5161	-0.905906	0.256798	-3.5277	0.000419192	0.156887
VILL	12.4854	2.0505	0.586447	3.49648	0.000471433	0.164059
GRHL2	3137.49	-0.689034	0.200068	-3.444	0.000573177	0.190399
ZSWIM5	187.745	0.647689	0.187885	3.44726	0.000566313	0.190399
SNAI2	52.7802	-1.53591	0.447659	-3.431	0.000601372	0.195325
OTUD7B	1280.82	-0.601295	0.175978	-3.41687	0.000633467	0.201277
CBLL1	789.857	-0.622511	0.183367	-3.3949	0.000686537	0.211481
RHOU	1211.69	-1.04725	0.309275	-3.38615	0.000708794	0.211481
TUBA8	6.35737	-5.48639	1.62028	-3.38608	0.000708988	0.211481
MYL12B	371.537	1.50647	0.448269	3.36065	0.00077759	0.227305
OCRL	1637.84	-0.277122	0.0835758	-3.31581	0.000913763	0.247325
GPNMB	35.4384	-1.53795	0.463446	-3.31852	0.000904962	0.247325
VLDLR	402.555	-0.553543	0.166596	-3.32267	0.000891613	0.247325
TSEN15	395.247	0.512127	0.154127	3.32276	0.000891331	0.247325
UBE2G1	2561.52	-0.325336	0.0982907	-3.30993	0.000933181	0.247989
RREB1	1348.39	-0.369096	0.111722	-3.30369	0.000954216	0.249051
SMS	2845.84	-0.301942	0.0927335	-3.25601	0.00112988	0.269781
AKNA	28.0647	3.34094	1.02848	3.24844	0.0011604	0.269781
PRKAR2A	3412.2	-0.424422	0.130516	-3.25187	0.0011465	0.269781
KLHL29	215.766	-0.534237	0.163919	-3.25915	0.00111745	0.269781
NMNAT2	174.574	-1.06672	0.326418	-3.26794	0.00108332	0.269781
F2RL1	735.574	-0.452371	0.139284	-3.24784	0.00116285	0.269781
NXF2B	8.91918	5.8068	1.782	3.25858	0.0011197	0.269781
OSR2	257.2	0.671574	0.207417	3.2378	0.00120455	0.27509
SHROOM3	3383.07	-0.348351	0.108274	-3.21733	0.00129391	0.282819
CCNI2	4.49381	5.36416	1.66756	3.21677	0.00129645	0.282819
AL136295.5	62.4674	1.56668	0.486217	3.22218	0.0012722	0.282819
SOCS2	331.646	-0.633849	0.197905	-3.2028	0.00136098	0.287392
METTL2B	602.444	-0.515476	0.160891	-3.20389	0.00135583	0.287392
AP000295.1	44.5563	-7.94835	2.4842	-3.19956	0.0013764	0.287392
JMJD6	99.0391	-1.56895	0.495915	-3.16375	0.00155749	0.319847
TAGLN2	17.1388	5.04577	1.59657	3.16039	0.0015756	0.319847
AKAP12	60.0333	-1.44136	0.458652	-3.14261	0.00167451	0.333918
MTF1	575.097	0.754129	0.240183	3.1398	0.00169061	0.333918
CDK7	356.882	1.60356	0.514539	3.11649	0.00183016	0.347518
PIK3AP1	420.256	-0.828415	0.265825	-3.11639	0.0018308	0.347518
AC009690.1	3.42203	4.85961	1.55806	3.119	0.00181463	0.347518
TBRG1	2141.77	-0.336956	0.108264	-3.11235	0.00185604	0.347793
KCNN2	2869.28	-0.333385	0.10741	-3.10385	0.00191022	0.35321
HPS4	805.011	-0.270312	0.0871892	-3.1003	0.00193328	0.35321
KANK3	41.823	1.21487	0.39257	3.09464	0.0019705	0.354151
AL033529.1	4.68251	-5.39039	1.74323	-3.09218	0.00198689	0.354151
CHAC1	238.697	0.980636	0.318664	3.07734	0.00208859	0.363415
XRCC6	1975.46	1.15197	0.374045	3.07975	0.00207174	0.363415
GREB1	412.877	-0.618498	0.202455	-3.05499	0.00225068	0.387011
CAMKK2	4904.91	-0.517719	0.169879	-3.04757	0.00230697	0.392077
PCSK4	84.2951	0.904806	0.298155	3.03469	0.00240787	0.399925
ZNF773	67.6792	0.849516	0.279921	3.03485	0.00240658	0.399925
TERT	10.398	-4.17307	1.38494	-3.01317	0.00258534	0.424577
ASB3	13.2337	2.5252	0.842451	2.99744	0.00272257	0.437287
ZNF23	79.2313	-0.810898	0.270377	-2.99914	0.0027074	0.437287
HFM1	4.37836	4.3205	1.4511	2.9774	0.002907	0.461834
IRS2	172.37	-0.914946	0.307765	-2.97287	0.00295033	0.463678
ERN1	747.014	-0.605503	0.20432	-2.96351	0.00304152	0.472924
TTC8	492.71	-0.792192	0.268329	-2.95232	0.00315399	0.485249
LRIG1	212.44	-0.952817	0.323799	-2.94262	0.00325452	0.495501
CCDC141	106.258	-1.49645	0.50943	-2.9375	0.00330868	0.498553
LIFR	573.156	-0.752293	0.256738	-2.93019	0.00338751	0.505223
PRKY	54.9238	1.55145	0.530757	2.92309	0.00346575	0.51167
TPM1	1774.15	-0.278604	0.0957196	-2.91063	0.00360706	0.527208
ENDOD1	6332.37	-0.481284	0.165888	-2.90126	0.0037167	0.532581
OR7E157P	4.94223	-4.84259	1.66888	-2.90169	0.00371151	0.532581
ZNF143	477.492	-0.574299	0.200355	-2.86641	0.00415158	0.580374
ROR2	29.4346	1.50963	0.527078	2.86415	0.00418135	0.580374
MESP2	34.0298	1.10161	0.384904	2.86205	0.00420906	0.580374
ZNF812P	65.5492	-0.896924	0.312508	-2.87009	0.00410358	0.580374
CKMT1A	589.848	1.45936	0.511875	2.85101	0.00435809	0.595307
FRY	358.925	-0.490622	0.172279	-2.84784	0.00440175	0.595703
SGSH	888.592	0.404536	0.142876	2.83137	0.0046349	0.621501
SNX8	696.457	0.733627	0.260257	2.81885	0.00481958	0.639071
FZD5	504.423	-0.645705	0.229249	-2.81661	0.00485337	0.639071
PLPP1	6216.43	-0.410127	0.147093	-2.78821	0.00530008	0.66374
EPN2	1295.53	-0.30859	0.110296	-2.79783	0.00514475	0.66374
SPOCK2	19.887	1.60682	0.575023	2.79436	0.00520023	0.66374
C12orf45	404.359	0.435619	0.155809	2.79586	0.00517616	0.66374
EHBP1L1	181.698	0.560677	0.201147	2.78741	0.00531319	0.66374
RPS7P1	4.04757	-4.02626	1.44411	-2.78806	0.00530242	0.66374
NIPSNAP1	22.0953	1.12633	0.406332	2.77193	0.00557242	0.690225
SLC2A3	32.6304	-1.34664	0.49027	-2.74673	0.00601918	0.710532
AGO1	1692.82	-0.30107	0.10963	-2.74625	0.00602805	0.710532
CRISPLD2	224.65	-0.549346	0.199598	-2.75226	0.00591863	0.710532
MICAL2	1497.91	-0.355889	0.129371	-2.75092	0.00594281	0.710532
OTULINL	315.743	-0.912822	0.330958	-2.75812	0.00581351	0.710532
GUSBP16	2.8985	5.51228	1.99977	2.75645	0.00584326	0.710532
SLC22A1	11.9996	1.7377	0.633528	2.74289	0.00609017	0.712112
ZCCHC2	195.239	-0.606845	0.222014	-2.73336	0.00626924	0.727232
SLC35F2	1035.56	-0.529531	0.194382	-2.72418	0.00644622	0.736078
DFFB	43.6871	-1.62539	0.596441	-2.72515	0.00642731	0.736078
IFNGR1	5.67448	-2.81201	1.03516	-2.71651	0.00659746	0.747507
MKLN1	1060.66	-0.340295	0.125568	-2.71004	0.00672741	0.748779
CTNND1	7253.75	-0.207856	0.0767339	-2.70879	0.00675291	0.748779
C1QTNF3-AMACR	35.4195	1.7638	0.65125	2.70833	0.00676237	0.748779
TRIM49D1	102.578	-0.981522	0.363218	-2.70229	0.00688631	0.756769
DUSP10	144.422	-0.68815	0.256068	-2.68737	0.00720172	0.760968
PARP8	161.63	0.711551	0.264835	2.68678	0.0072145	0.760968
SETBP1	807.757	-0.397587	0.148107	-2.68446	0.00726479	0.760968
BDH1	857.575	0.271076	0.100854	2.68781	0.00719216	0.760968
C18orf32	127.306	0.716102	0.266722	2.68482	0.00725678	0.760968
RALGAPA2	893.201	-0.326567	0.121133	-2.69594	0.00701909	0.760968
C4B	17.8324	2.19906	0.819521	2.68335	0.00728897	0.760968
AK4	3606.22	-0.297512	0.111206	-2.67532	0.00746585	0.763083
ELOVL7	411.851	-0.781299	0.292019	-2.6755	0.00746169	0.763083
PKD1P1	261.766	0.859857	0.320861	2.67985	0.00736558	0.763083
ZMIZ1	2879.75	-0.313859	0.117769	-2.66504	0.00769802	0.781349
GSTO2	77.3596	0.724147	0.272223	2.66013	0.00781107	0.7851
SIN3A	1207.41	-0.287157	0.108003	-2.65878	0.00784241	0.7851
TBC1D1	1938.98	-0.300636	0.113746	-2.64305	0.00821638	0.795302
KDM4C	212.299	0.441109	0.166874	2.64336	0.00820871	0.795302
EAPP	831.948	0.262645	0.0992129	2.64729	0.00811409	0.795302
BTBD9	866.923	-0.254383	0.096201	-2.64429	0.00818633	0.795302
H2AC8	79.725	0.593592	0.224416	2.64505	0.00816797	0.795302
GRB7	170.852	0.533194	0.202082	2.6385	0.00832729	0.795502
FBN3	4.94746	2.99451	1.13488	2.63861	0.00832462	0.795502
LY6E	749.626	0.925152	0.351019	2.63562	0.00839844	0.797089
TBX15	39.7472	-0.873459	0.334872	-2.60834	0.00909836	0.800294
CRKL	1312.06	-0.296945	0.114039	-2.60389	0.00921725	0.800294
NINL	56.2486	1.21426	0.462732	2.6241	0.00868783	0.800294
CRNKL1	12.4807	7.68261	2.94675	2.60715	0.00912991	0.800294
NR4A1	367.436	-0.535952	0.206115	-2.60026	0.00931536	0.800294
MT2A	1595.06	0.635549	0.245413	2.58972	0.00960551	0.800294
PSMA1	729.004	0.74285	0.287108	2.58736	0.00967159	0.800294
IL36G	16.2733	1.77784	0.679294	2.61719	0.0088657	0.800294
IL1RN	228.58	0.467885	0.179549	2.60589	0.00916366	0.800294
MBOAT2	2184.13	-0.608921	0.231384	-2.63165	0.00849711	0.800294
FAM86B2	12.5174	1.81704	0.700118	2.59533	0.00944996	0.800294
SOGA1	3379.11	-0.241196	0.0926096	-2.60444	0.00920238	0.800294
GRHL3	3.97295	-5.35516	2.05774	-2.60245	0.0092561	0.800294
NBEAL2	453.701	0.661127	0.25307	2.61243	0.00899014	0.800294
YWHAG	9156.38	-0.357773	0.138303	-2.58688	0.0096849	0.800294
ZHX2	495.164	-0.368032	0.140085	-2.6272	0.00860906	0.800294
LDLRAD3	491.589	-0.383892	0.147742	-2.59839	0.00936608	0.800294
TMEM242	5.16656	3.56226	1.37501	2.59071	0.00957771	0.800294
NSUN5P1	297.251	0.484749	0.18713	2.59044	0.00958544	0.800294
ERVMER34-1	125.964	0.507304	0.195904	2.58955	0.00961008	0.800294
TPM3P9	123.776	-0.721776	0.277165	-2.60414	0.00921059	0.800294
DYNLL2	6908.92	-0.2074	0.0801813	-2.58664	0.00969157	0.800294
TBCE.1	311.399	-1.21354	0.4642	-2.61426	0.00894206	0.800294
INSIG1	1874.35	-0.353084	0.136619	-2.58445	0.00975346	0.80088
KCTD16	2.23958	4.14203	1.60576	2.57948	0.00989481	0.807947
NUP205	2667.41	-0.21088	0.0818406	-2.57671	0.00997459	0.809936
STEAP4	29.3414	-1.20141	0.466853	-2.57342	0.01007	0.813166
PTPN9	1401.83	-0.222091	0.0863808	-2.57106	0.0101387	0.814215
CLASP1	707.043	-0.604439	0.235814	-2.5632	0.0103711	0.823828
BICD2	648.092	-0.401072	0.156416	-2.56414	0.0103431	0.823828
BCL2L14	6.43205	2.35378	0.919052	2.5611	0.0104342	0.824355
USB1	239.975	0.91652	0.35868	2.55526	0.0106109	0.829356
PRKCA	340.361	-0.60025	0.234859	-2.55579	0.0105947	0.829356
GRIP1	13.9921	3.26189	1.2802	2.54795	0.0108358	0.842429
CHTF18	518.236	0.610301	0.239938	2.54357	0.0109725	0.844071
ADAMTS1	7075.12	-0.356841	0.140282	-2.54374	0.0109673	0.844071
PRRC1	603.876	-0.563663	0.222954	-2.52815	0.0114665	0.870874
SERPINB8	53.9219	-1.37962	0.545549	-2.52887	0.0114432	0.870874
MT1X	1059.61	0.545806	0.215978	2.52714	0.0114996	0.870874
PDZRN3	212.232	-0.563713	0.223792	-2.51891	0.0117718	0.877836
TP53TG3	65.2858	1.33042	0.527606	2.52161	0.0116818	0.877836
STK39	1648.48	-0.471122	0.186978	-2.51966	0.0117467	0.877836
LYN	659.72	-0.384647	0.152826	-2.5169	0.0118394	0.878398
LRRFIP2	1448.03	-0.504151	0.200704	-2.51191	0.012008	0.885493
CSGALNACT1	169.241	-0.767671	0.305785	-2.5105	0.0120562	0.885493
TUBA3D	111.893	-0.65646	0.263074	-2.49534	0.0125837	0.902018
PAK1IP1	418.991	-0.67191	0.269174	-2.49619	0.0125536	0.902018
FOXD4	62.482	-0.913697	0.366186	-2.49517	0.0125897	0.902018
LPAR3	1407.68	-0.478758	0.191363	-2.50183	0.0123553	0.902018
SP9	39.8254	-0.864813	0.346197	-2.49804	0.0124883	0.902018
MT1F	131.713	0.538145	0.215946	2.49203	0.0127015	0.905583
COBL	933.864	-0.341736	0.137287	-2.48921	0.0128027	0.90837
FYN	43.1409	1.2245	0.492301	2.4873	0.0128716	0.908849
DEGS1	6211.3	-0.2348	0.0947076	-2.4792	0.0131676	0.925275
WDR90	735.474	0.376571	0.152181	2.4745	0.0133424	0.933076
PSMC4	326.739	-1.04264	0.421792	-2.47194	0.0134382	0.935299
RPGRIP1	7.04301	-2.35232	0.95453	-2.46438	0.0137251	0.949508
CCDC159	258.961	0.53651	0.21791	2.46207	0.0138136	0.949508
LINC01145	1199.88	-0.236311	0.0960044	-2.46146	0.0138372	0.949508
ACSL3	2268.47	-0.675654	0.275565	-2.45188	0.014211	0.96636
TBC1D31	168.061	-0.48012	0.195861	-2.45133	0.0142331	0.96636
SLC16A13	2.09567	-4.50016	1.83672	-2.45011	0.0142812	0.96636
NBEAL1	119.636	1.0452	0.426926	2.4482	0.0143573	0.967034
PUS3	567.89	-0.356878	0.146055	-2.44346	0.0145473	0.972394
NUP98	3787.13	-0.255938	0.104768	-2.4429	0.0145699	0.972394
CDH26	3.84932	4.34395	1.78281	2.43657	0.0148272	0.974859
SLC38A4	27.7928	-1.11595	0.458373	-2.43459	0.0149088	0.974859
PPP4R1	1187.44	-0.325878	0.133541	-2.44029	0.0146756	0.974859
YEATS2	1044.38	-0.352856	0.145076	-2.43221	0.0150071	0.974859
NUDT9	725.796	-0.412755	0.169647	-2.43302	0.0149733	0.974859
SFTPA2	5.32533	3.52398	1.44599	2.43707	0.014807	0.974859
ANKRD6	66.835	0.805192	0.332857	2.41903	0.015562	0.991246
KLHL36	1162.13	-0.29161	0.120615	-2.4177	0.0156189	0.991246
ANAPC1	1470.91	-0.39906	0.16495	-2.41928	0.0155513	0.991246
CRCP	772.52	-0.265415	0.10983	-2.4166	0.0156662	0.991246
NDUFA7	127.733	0.826429	0.341303	2.4214	0.015461	0.991246
C8orf44-SGK3	6.6273	-5.53915	2.28992	-2.41893	0.0155664	0.991246
PSAT1	7905.48	0.254298	0.105319	2.41456	0.015754	0.992505
ITGA3	258.781	0.645107	0.26743	2.41225	0.0158544	0.994542
DPM1	26.3293	1.244	0.638526	1.94823	0.051387	0.995568
SCYL3	177.712	-0.13175	0.254296	-0.518096	0.604391	0.995568
C1orf112	295.257	-0.125159	0.172489	-0.725608	0.468079	0.995568
GCLC	363.605	-0.321458	0.272717	-1.17872	0.238509	0.995568
NFYA	942.151	-0.108601	0.237802	-0.456685	0.647898	0.995568
STPG1	233.096	0.106286	0.130076	0.817106	0.413868	0.995568
NIPAL3	1580.7	0.0518129	0.0965413	0.536692	0.591481	0.995568
LAS1L	1402.22	-0.0348858	0.131216	-0.265866	0.790342	0.995568
SEMA3F	467.84	0.181176	0.258646	0.700479	0.483628	0.995568
ANKIB1	672.276	-0.159447	0.385789	-0.413302	0.679385	0.995568
CYP51A1	2004.49	-0.384583	0.237775	-1.61743	0.105786	0.995568
RAD52	88.7181	0.184137	0.285946	0.643957	0.519604	0.995568
BAD	150.008	0.26463	0.302721	0.874172	0.382025	0.995568
LAP3	1878.63	-0.0982951	0.152617	-0.644065	0.519533	0.995568
CD99	6390.46	0.262898	0.249551	1.05348	0.29212	0.995568
HS3ST1	202.03	-0.579587	0.30936	-1.87351	0.0609985	0.995568
MAD1L1	594.516	0.29446	0.260527	1.13025	0.258371	0.995568
LASP1	4466.74	0.155318	0.167262	0.928591	0.353101	0.995568
SNX11	122.564	0.283078	0.318077	0.889966	0.373484	0.995568
KLHL13	121.113	-0.215402	0.256926	-0.838379	0.401818	0.995568
CYP26B1	2.875	1.19715	1.62709	0.735763	0.461875	0.995568
ICA1	1246.76	0.146606	0.128567	1.14031	0.254156	0.995568
DBNDD1	66.0554	0.442075	0.344754	1.28229	0.19974	0.995568
ALS2	406.868	-0.284277	0.250911	-1.13298	0.257222	0.995568
CFLAR	580.451	-0.0879443	0.193837	-0.453703	0.650043	0.995568
TFPI	2092.73	-0.122832	0.145051	-0.846818	0.397097	0.995568
NDUFAF7	144.962	0.108573	0.262008	0.414388	0.67859	0.995568
MTMR7	4.33278	2.61931	1.55621	1.68314	0.0923482	0.995568
ARF5	3899.74	0.231756	0.236698	0.97912	0.327521	0.995568
SARM1	1366.81	0.0955913	0.246634	0.387583	0.698324	0.995568
POLDIP2	6152.22	0.225131	0.204709	1.09976	0.271436	0.995568
PLXND1	3.97833	0.485916	1.36371	0.356319	0.721601	0.995568
CD38	4.4365	-1.52776	1.20086	-1.27222	0.203294	0.995568
FKBP4	13527	0.100733	0.250742	0.401738	0.687877	0.995568
KDM1A	2010.95	-0.141108	0.118515	-1.19063	0.2338	0.995568
RECQL	227.822	-0.508032	0.46176	-1.10021	0.271241	0.995568
HSPB6	10.4779	0.800782	0.621233	1.28902	0.197391	0.995568
ARHGAP33	271.695	0.0872595	0.240292	0.363139	0.716501	0.995568
NDUFAB1	2583.03	0.0823386	0.100334	0.820648	0.411847	0.995568
ZMYND10	145.048	0.221709	0.28427	0.779923	0.435436	0.995568
ARX	50.1155	-0.134691	0.295415	-0.455939	0.648434	0.995568
SLC25A13	27.6404	-0.465535	0.708371	-0.657191	0.511058	0.995568
ST7	2799.43	-0.0782509	0.112348	-0.696502	0.486114	0.995568
SKAP2	1069.4	-0.248751	0.336362	-0.739535	0.459582	0.995568
SLC25A5	12856.5	0.23221	0.215536	1.07736	0.281319	0.995568
POLR2J	1276.63	0.147698	0.208424	0.708644	0.478546	0.995568
DHX33	818.766	-0.187901	0.202716	-0.92692	0.353968	0.995568
THSD7A	9.04507	-0.688731	0.866139	-0.795174	0.426512	0.995568
LIG3	644.534	0.0901423	0.178943	0.503749	0.614438	0.995568
RPAP3	355.239	0.284422	0.301807	0.942399	0.345988	0.995568
ACSM3	453.194	-0.337511	0.287227	-1.17507	0.239968	0.995568
REXO5	367.939	0.116979	0.241488	0.484407	0.628097	0.995568
CIAPIN1	1700.37	0.0682023	0.186818	0.365075	0.715056	0.995568
SPPL2B	858.195	0.269419	0.25655	1.05016	0.293644	0.995568
FAM214B	313.717	-0.245244	0.312748	-0.784157	0.432948	0.995568
MSL3	202.581	-0.107462	0.42042	-0.255606	0.798255	0.995568
CREBBP	547.47	-0.160375	0.163011	-0.983831	0.325199	0.995568
GCFC2	227.46	0.0924771	0.28417	0.325429	0.744856	0.995568
WDR54	570.94	0.423901	0.277728	1.52632	0.126931	0.995568
CROT	51.3303	-0.435091	0.452718	-0.961065	0.33652	0.995568
KMT2E	670.789	-0.0894728	0.391175	-0.228728	0.81908	0.995568
RHBDD2	2451.45	0.409681	0.261133	1.56886	0.116681	0.995568
IBTK	1000.36	-0.185668	0.446557	-0.415778	0.677572	0.995568
ZNF195	256.224	-0.108023	0.439615	-0.245722	0.805898	0.995568
MYCBP2	2474.95	-0.481101	0.429163	-1.12102	0.262278	0.995568
FBXL3	523.031	-0.129934	0.470441	-0.276196	0.782397	0.995568
PDK2	716.119	0.30161	0.288011	1.04722	0.295	0.995568
ZFX	265.109	-0.431957	0.383199	-1.12724	0.259641	0.995568
LAMP2	2613.19	-0.259506	0.30338	-0.855383	0.392339	0.995568
ITGA2B	5.49804	-0.362137	1.53438	-0.236015	0.813421	0.995568
GDE1	2828.63	0.117143	0.136321	0.85932	0.390164	0.995568
REX1BD	591.199	0.215727	0.219413	0.9832	0.325509	0.995568
CRLF1	44.798	0.424253	0.385023	1.10189	0.270509	0.995568
TMEM98	1740.99	0.140898	0.195734	0.71984	0.471623	0.995568
MAP3K14	266.619	0.0902954	0.21614	0.417763	0.67612	0.995568
ABCC8	33.2157	0.690016	0.506904	1.36124	0.173439	0.995568
TMEM132A	3716.56	0.304511	0.231609	1.31476	0.188589	0.995568
ZNF263	1205.72	-0.0765495	0.103207	-0.741712	0.458262	0.995568
SPATA20	4412.92	0.322827	0.235666	1.36985	0.170735	0.995568
CACNA1G	17.0297	0.500338	0.501149	0.99838	0.318095	0.995568
TNFRSF12A	16.5289	0.771264	0.605071	1.27467	0.202427	0.995568
MAP3K9	631.551	-0.23199	0.123635	-1.87641	0.0605987	0.995568
RALA	932.941	-0.113348	0.30464	-0.372073	0.709839	0.995568
BAIAP2L1	2153.61	-0.0552138	0.138725	-0.398008	0.690624	0.995568
KDM7A	250.234	-0.303923	0.368958	-0.823732	0.410092	0.995568
ETV1	5208.75	-0.263546	0.236741	-1.11323	0.265612	0.995568
FARP2	1402.5	-0.242668	0.127047	-1.91007	0.0561237	0.995568
DBF4	231.148	-0.149224	0.375094	-0.397832	0.690754	0.995568
IFRD1	264.271	0.13039	0.419884	0.310538	0.756152	0.995568
COX10	410.453	0.0349266	0.113721	0.307125	0.758748	0.995568
GTF2IRD1	619.13	0.157019	0.138266	1.13563	0.256113	0.995568
VPS41	996.088	-0.133471	0.194805	-0.685154	0.493247	0.995568
ELAC2	3241.82	-0.0573166	0.148284	-0.386533	0.699102	0.995568
ARSD	2365.85	0.105484	0.170158	0.619917	0.535313	0.995568
PNPLA4	1037.34	0.220532	0.25412	0.867826	0.38549	0.995568
ADIPOR2	1880.49	-0.0991301	0.0760776	-1.30301	0.19257	0.995568
CDKL3	18.4563	0.549592	0.624027	0.880718	0.378471	0.995568
MARK4	475.588	0.137615	0.317668	0.433203	0.664867	0.995568
CCDC124	1922.28	0.251426	0.230611	1.09026	0.275598	0.995568
PAFAH1B1	2540.07	0.194455	0.194563	0.999444	0.31758	0.995568
DNAH9	13.6223	-0.289613	0.574378	-0.504221	0.614106	0.995568
KIAA0100	11670.1	0.078501	0.197586	0.3973	0.691146	0.995568
GAS7	5.44324	1.5696	1.18172	1.32824	0.1841	0.995568
TRAPPC6A	493.143	0.261101	0.277669	0.940332	0.347047	0.995568
ST7L	658.563	0.0592145	0.166504	0.355633	0.722115	0.995568
TKTL1	4.11136	0.98627	1.2464	0.791296	0.428771	0.995568
RPUSD1	980.192	0.305206	0.225944	1.35081	0.176758	0.995568
LUC7L	184.045	0.304589	0.443102	0.687403	0.491829	0.995568
CACNA2D2	144.479	0.191434	0.228165	0.839014	0.401461	0.995568
TSR3	1047.36	0.287353	0.195877	1.467	0.142375	0.995568
PIGQ	365.929	0.548215	0.29953	1.83025	0.067212	0.995568
CRAMP1	356.333	-0.356915	0.43654	-0.817599	0.413586	0.995568
TEAD3	445.186	-0.108535	0.147891	-0.733882	0.46302	0.995568
DNAJC11	2161.43	0.0840043	0.169786	0.494765	0.620766	0.995568
MYLIP	278.531	0.173529	0.144419	1.20157	0.22953	0.995568
NOX1	6.3446	0.888231	0.809429	1.09736	0.272486	0.995568
PSMB1	3789.62	0.0658174	0.113348	0.580664	0.561467	0.995568
JARID2	576.515	-0.190934	0.142141	-1.34327	0.179186	0.995568
CDKL5	7.84753	-0.915975	1.26485	-0.724179	0.468956	0.995568
NADK	2319.99	0.0790656	0.118166	0.669105	0.503429	0.995568
SYPL1	1996.86	-0.0637145	0.154212	-0.41316	0.679489	0.995568
SPAG9	912.315	-0.301095	0.345204	-0.872223	0.383087	0.995568
CELSR3	132.433	0.139175	0.297787	0.467364	0.64024	0.995568
AASS	228.481	-0.227043	0.24149	-0.940177	0.347127	0.995568
PLEKHG6	24.9415	0.242897	0.496773	0.488949	0.624877	0.995568
SS18L2	7.2178	-1.05119	0.928391	-1.13227	0.25752	0.995568
MPND	149.705	0.446055	0.344049	1.29648	0.194809	0.995568
MGST1	2920.9	0.148832	0.127674	1.16572	0.243727	0.995568
CRY1	374.677	0.179245	0.394558	0.454292	0.649619	0.995568
NFIX	18768.4	0.124666	0.22367	0.557366	0.577278	0.995568
ST3GAL1	8121.09	0.106637	0.0904097	1.17949	0.238204	0.995568
MMP25	20.477	0.325695	0.447186	0.72832	0.466418	0.995568
IL32	51.225	0.484024	0.53325	0.907687	0.364043	0.995568
MAPK8IP2	481.09	0.170826	0.262357	0.65112	0.514969	0.995568
MED24	2200.13	0.0586568	0.16617	0.352992	0.724094	0.995568
RHOBTB2	569.679	-0.204449	0.295529	-0.691806	0.489059	0.995568
HEATR5B	776.048	-0.267508	0.218815	-1.22253	0.221506	0.995568
SEC62	1169.72	-0.190081	0.420952	-0.451551	0.651592	0.995568
RPS20	183.9	0.280174	0.266449	1.05151	0.293024	0.995568
CSDE1	17590.9	-0.190895	0.187786	-1.01656	0.309364	0.995568
UBE3C	3472.52	-0.229587	0.15464	-1.48466	0.137633	0.995568
REV3L	34.1911	-2.3192	1.93418	-1.19906	0.230505	0.995568
TENM1	25.7538	0.132989	0.547935	0.242709	0.808231	0.995568
IYD	70.4463	-0.415097	0.452146	-0.918061	0.358587	0.995568
FAM76A	58.4724	0.226077	0.388444	0.582006	0.560562	0.995568
TRAF3IP3	3.73427	-1.2442	1.29922	-0.957654	0.338237	0.995568
POMT2	109.65	0.800308	0.367557	2.17737	0.0294529	0.995568
MLXIPL	35.6744	0.098519	0.422543	0.233157	0.815639	0.995568
BAZ1B	2921.6	-0.255785	0.247219	-1.03465	0.300834	0.995568
RANBP9	1098.71	-0.117632	0.25336	-0.464288	0.642441	0.995568
SPRTN	245.621	0.121568	0.337376	0.360333	0.718598	0.995568
EEF1AKNMT	1483.09	0.0296915	0.119573	0.248312	0.803893	0.995568
DYRK4	343.118	-0.0311202	0.135664	-0.229393	0.818564	0.995568
ZNF207	6025.03	-0.026171	0.101406	-0.258083	0.796343	0.995568
UQCRC1	6886.33	0.491328	0.308381	1.59325	0.111105	0.995568
STARD3NL	669.43	-0.0962337	0.172123	-0.559098	0.576095	0.995568
NCAPD2	3368.13	0.0784782	0.172061	0.456107	0.648313	0.995568
PHF7	157.486	0.143654	0.196011	0.732886	0.463628	0.995568
NISCH	2039.97	0.105611	0.119838	0.881282	0.378165	0.995568
STAB1	8.43474	0.879935	0.854358	1.02994	0.303039	0.995568
FUZ	163.298	0.163971	0.275854	0.594414	0.552235	0.995568
PRSS3	26.2015	0.129138	0.465515	0.277409	0.781466	0.995568
LRRC23	233.022	0.0492427	0.209605	0.234931	0.814262	0.995568
HFE	140.318	-0.172677	0.230861	-0.74797	0.454478	0.995568
SCMH1	2538.49	0.15052	0.179657	0.837822	0.402131	0.995568
ELOA	1744.65	-0.0512122	0.12567	-0.407513	0.683631	0.995568
LYPLA2	939.545	0.0574288	0.176117	0.326082	0.744362	0.995568
CLCN6	302.054	-0.0500717	0.20141	-0.248606	0.803665	0.995568
MRC2	3.74519	0.47595	1.18303	0.402315	0.687452	0.995568
NME1-NME2	158.96	-0.333737	0.375637	-0.888456	0.374296	0.995568
TSPAN9	1190.25	0.156816	0.184249	0.85111	0.394708	0.995568
APBA3	219.746	0.149686	0.284859	0.525475	0.599253	0.995568
MKS1	231.357	0.156018	0.169012	0.923117	0.355946	0.995568
ABHD5	623.24	0.0399508	0.131169	0.304575	0.76069	0.995568
ANOS1	9.86826	-0.387404	0.959405	-0.403796	0.686363	0.995568
AKAP8L	1141.03	0.167419	0.164292	1.01903	0.308187	0.995568
UTP18	1033.06	-0.231576	0.178853	-1.29478	0.195396	0.995568
RNF216	1011.8	0.0753454	0.128506	0.586317	0.557662	0.995568
TTC19	1745.51	-0.131902	0.186042	-0.70899	0.478331	0.995568
PTBP1	10045.8	0.127139	0.193463	0.657173	0.51107	0.995568
DPF1	121.348	0.287707	0.237536	1.21121	0.225814	0.995568
SYT7	1162.84	0.246019	0.204126	1.20523	0.228115	0.995568
LARS2	2262.53	-0.0759505	0.103451	-0.734167	0.462847	0.995568
PIK3C2A	499.549	-0.337364	0.500329	-0.674284	0.500131	0.995568
PLAUR	6.64391	0.712118	0.824458	0.863741	0.38773	0.995568
ANLN	678.162	-0.32383	0.358289	-0.903826	0.366088	0.995568
WIZ	928.788	-0.0997329	0.187376	-0.532261	0.594545	0.995568
RABGAP1	1273	-0.296766	0.302816	-0.98002	0.327076	0.995568
QPCTL	209.737	0.330066	0.266153	1.24014	0.214925	0.995568
PPP5C	114.074	-0.235295	0.399115	-0.589542	0.555498	0.995568
CEP68	319.488	0.240131	0.136329	1.7614	0.0781708	0.995568
MAP4K3	202.209	0.378489	0.451071	0.839089	0.401419	0.995568
ZBTB32	17.7949	0.373405	0.602792	0.619459	0.535614	0.995568
TMEM159	458.404	0.305649	0.153892	1.98612	0.0470198	0.995568
GABRA3	182.98	0.0683579	0.219932	0.310814	0.755942	0.995568
BRCA1	95.6179	-0.220689	0.548546	-0.402316	0.687451	0.995568
ERCC1	1053.78	0.320595	0.26639	1.20348	0.22879	0.995568
SEMA3B	222.392	0.22816	0.31337	0.728086	0.466561	0.995568
MBTPS2	918.899	-0.520472	0.312354	-1.66629	0.0956556	0.995568
LTF	29.78	0.203289	0.401345	0.506519	0.612492	0.995568
EXTL3	15.342	0.868375	1.20797	0.718872	0.47222	0.995568
ELOVL5	6334.71	-0.319036	0.174653	-1.82668	0.0677478	0.995568
KDM5D	81.3222	0.682213	0.620537	1.09939	0.271597	0.995568
CALCOCO1	599.505	0.116781	0.215761	0.541251	0.588335	0.995568
UBR7	1405.6	-0.0558813	0.111828	-0.499707	0.617281	0.995568
MAP4K5	238.702	-0.198238	0.287747	-0.688931	0.490867	0.995568
EHD3	404.372	-0.0536452	0.118082	-0.454306	0.649608	0.995568
SLC25A39	5471.47	0.310873	0.242803	1.28035	0.200421	0.995568
MVP	383.518	0.299669	0.302545	0.990497	0.321931	0.995568
NUB1	1175.5	-0.115876	0.109703	-1.05626	0.290848	0.995568
PGM3	1126.49	-0.301023	0.270932	-1.11106	0.266541	0.995568
RWDD2A	765.436	0.0625208	0.210631	0.296825	0.7666	0.995568
CLK1	255.521	0.13386	0.463952	0.28852	0.772949	0.995568
POLR3B	721.304	-0.249422	0.239202	-1.04272	0.297076	0.995568
ANGEL1	40.7119	0.133314	0.393275	0.338984	0.734622	0.995568
RNF14	1530.41	-0.13956	0.122122	-1.14279	0.253124	0.995568
DNASE1L1	911.77	0.250881	0.197694	1.26904	0.204428	0.995568
HEBP1	831.868	0.0512002	0.189225	0.270579	0.786715	0.995568
MAMLD1	11.869	0.4922	0.515902	0.954057	0.340055	0.995568
TACC3	2022.39	0.0421912	0.135224	0.312009	0.755034	0.995568
UFL1	612.029	0.102283	0.422146	0.242293	0.808553	0.995568
POLA2	567.983	0.104822	0.214877	0.487823	0.625675	0.995568
ZC3H3	605.285	0.342188	0.25386	1.34794	0.177678	0.995568
CAPN1	704.589	0.242435	0.423017	0.573109	0.566571	0.995568
ACP3	4856.93	-0.15791	0.100964	-1.56402	0.117812	0.995568
SLC30A9	1896.1	-0.241181	0.364751	-0.66122	0.508471	0.995568
MTMR11	29.9177	0.174798	0.506591	0.345047	0.730059	0.995568
COX15	414.327	-0.0617809	0.130977	-0.471694	0.637145	0.995568
CCDC88C	835.294	-0.0943172	0.149245	-0.631964	0.52741	0.995568
ZMYND11	1632.5	-0.291238	0.307873	-0.945966	0.344166	0.995568
BID	151.454	0.137011	0.27509	0.498057	0.618444	0.995568
NPC1L1	4.29739	2.36978	1.24693	1.90049	0.0573691	0.995568
XYLT2	43.0747	-0.307079	0.396626	-0.77423	0.438795	0.995568
RGPD5	170.068	-1.08634	1.41578	-0.767303	0.442901	0.995568
STMN4	5.15839	-0.657045	0.825137	-0.796286	0.425866	0.995568
NUDCD3	2822.23	0.256559	0.26819	0.956631	0.338753	0.995568
IL20RA	16.6585	0.157081	0.698258	0.224961	0.82201	0.995568
GLT8D1	767.981	-0.104392	0.147998	-0.705356	0.480588	0.995568
ATP2C1	2093.24	-0.12341	0.195964	-0.629761	0.528851	0.995568
RALBP1	1680.26	-0.303312	0.249813	-1.21415	0.224689	0.995568
RUFY3	204.849	-0.140448	0.261041	-0.538031	0.590556	0.995568
SLC11A1	95.3454	0.263616	0.291135	0.905476	0.365213	0.995568
AGPS	107.016	-0.19475	0.565521	-0.344373	0.730566	0.995568
CXorf56	422.779	-0.0631453	0.106696	-0.591822	0.55397	0.995568
ATP1A2	2.43056	1.11102	1.76855	0.628208	0.529868	0.995568
TTC27	535.828	-0.296969	0.12503	-2.37519	0.0175399	0.995568
ZNF582	83.2297	0.251777	0.420722	0.59844	0.549546	0.995568
VSIG2	2.35733	1.71947	1.58085	1.08769	0.276732	0.995568
PHLDB1	658.691	0.13353	0.186712	0.715162	0.474509	0.995568
SYT13	6.95212	0.208678	0.763693	0.273249	0.784662	0.995568
ZRANB1	424.324	-0.218073	0.204574	-1.06599	0.28643	0.995568
NCDN	1695.68	0.118595	0.205053	0.578365	0.563018	0.995568
ZFP64	578.843	0.179313	0.173317	1.03459	0.300858	0.995568
SAMD4A	18.6721	1.03842	0.747663	1.38889	0.164865	0.995568
MRE11	148.851	-0.3193	0.433525	-0.73652	0.461414	0.995568
PLEKHB1	6587.24	0.204604	0.271063	0.754822	0.450356	0.995568
CYP3A43	2.38794	-0.539413	1.27601	-0.422735	0.672489	0.995568
SPAST	79.442	1.43598	0.921932	1.55757	0.119334	0.995568
OSBPL5	1168.28	0.088799	0.220069	0.403505	0.686577	0.995568
AQR	1392.34	-0.135192	0.167161	-0.80875	0.418659	0.995568
RTF2	1991.99	-0.0889203	0.100389	-0.88576	0.375747	0.995568
NLRP2	1361.99	-0.319453	0.244186	-1.30824	0.190793	0.995568
SLC45A4	246.807	-0.235218	0.181616	-1.29514	0.195272	0.995568
RNF10	6430.35	0.108979	0.207848	0.524323	0.600054	0.995568
ZNF839	398.2	0.1067	0.116313	0.917358	0.358955	0.995568
ZDHHC6	553.121	-0.201053	0.161088	-1.24809	0.211997	0.995568
RNH1	50.9727	1.54464	2.56346	0.60256	0.546802	0.995568
NDUFS1	3513.05	-0.174889	0.126881	-1.37836	0.168091	0.995568
RB1CC1	421.698	0.183303	0.56869	0.322324	0.747207	0.995568
ALAS1	2469.96	0.249212	0.186686	1.33493	0.1819	0.995568
AKAP11	640.686	-0.356484	0.402159	-0.886424	0.375389	0.995568
SNAPC1	113.671	0.306068	0.3717	0.823427	0.410265	0.995568
DERA	546.859	-0.0903355	0.11344	-0.796325	0.425843	0.995568
STRAP	4275.73	-0.14349	0.146473	-0.979637	0.327265	0.995568
DEF6	282.528	0.206388	0.138558	1.48954	0.136346	0.995568
GCLM	657.563	0.0699538	0.182557	0.383189	0.70158	0.995568
UBR2	740.674	-0.206171	0.289408	-0.71239	0.476223	0.995568
DEPDC1	315.87	0.370105	0.468914	0.789281	0.429948	0.995568
CCDC28A	167.997	0.155715	0.187231	0.831674	0.405593	0.995568
RRAGD	109.124	-0.283965	0.227489	-1.24826	0.211937	0.995568
HSD17B6	20.0785	-0.124399	0.558208	-0.222854	0.823649	0.995568
NR1H3	347.993	0.309553	0.257341	1.20289	0.22902	0.995568
TYMP	298.318	0.193152	0.28008	0.68963	0.490427	0.995568
NCAPH2	785.24	0.374306	0.255935	1.46251	0.143603	0.995568
TOMM34	2266.08	0.0668045	0.139351	0.479396	0.631657	0.995568
SEC63	2794.21	-0.158495	0.256838	-0.6171	0.537169	0.995568
RTEL1-TNFRSF6B	61.3821	-0.205515	0.384984	-0.533828	0.593461	0.995568
FAS	39.9792	0.383579	0.421965	0.909032	0.363333	0.995568
RNASET2	53.1803	1.84884	1.02033	1.812	0.0699859	0.995568
KCNG1	272.652	0.323619	0.219614	1.47358	0.140594	0.995568
AGPAT4	1.90587	-1.71779	1.75634	-0.978051	0.328049	0.995568
BTN3A1	179.836	0.254364	0.180384	1.41012	0.158503	0.995568
MIPEP	855.401	0.100397	0.210445	0.477067	0.633315	0.995568
PRKCH	260.238	-0.138051	0.227419	-0.607036	0.543827	0.995568
B4GALT7	681.31	0.174915	0.186055	0.940127	0.347153	0.995568
SH2D2A	2.17371	1.08354	1.35806	0.797862	0.424951	0.995568
TNFRSF1B	4.95539	-1.12096	1.17806	-0.951537	0.341332	0.995568
POU2F2	4.20679	-2.25357	1.26631	-1.77964	0.0751353	0.995568
TBPL1	686.224	0.0851343	0.166935	0.509984	0.610062	0.995568
ARNTL2	194.964	-0.221633	0.380866	-0.581919	0.560621	0.995568
BCLAF1	2722.9	-0.101746	0.341634	-0.297821	0.76584	0.995568
SLC39A9	2737.48	-0.140375	0.162795	-0.862283	0.388532	0.995568
ANK1	20.2108	0.595518	0.557625	1.06795	0.285541	0.995568
TFB1M	212.642	0.138054	0.178462	0.773579	0.43918	0.995568
RABEP1	1050.49	-0.228278	0.302001	-0.755887	0.449717	0.995568
NUP160	1153.41	-0.139182	0.164954	-0.843765	0.398801	0.995568
BAK1	855.603	0.279725	0.233813	1.19636	0.231555	0.995568
IKZF2	42.1695	0.941797	0.507919	1.85423	0.0637069	0.995568
GRN	2151.41	0.322636	0.275267	1.17208	0.241164	0.995568
FAM13B	1117.98	-0.223476	0.436591	-0.511866	0.608745	0.995568
CENPQ	44.4779	0.201302	0.658631	0.305637	0.759881	0.995568
SARS1	6391.34	0.239914	0.179772	1.33454	0.182026	0.995568
RANBP3	1677.38	0.0775022	0.167309	0.463228	0.643201	0.995568
ARID4A	6.01432	-1.07652	1.26674	-0.849832	0.395419	0.995568
PNPLA6	979.035	0.394509	0.249081	1.58386	0.113225	0.995568
ZCCHC8	35.9163	0.336809	0.674868	0.499074	0.617727	0.995568
ABCF2	1457.69	0.178783	0.248656	0.718997	0.472143	0.995568
LRRC7	25.8695	0.560316	0.476277	1.17645	0.239415	0.995568
FUT8	346.029	-0.0763331	0.290611	-0.262665	0.792809	0.995568
GAB2	69.0558	0.39542	0.283053	1.39698	0.162419	0.995568
ATP6V0A1	1660.94	0.165235	0.272279	0.60686	0.543944	0.995568
PIAS1	225.455	-0.25075	0.272871	-0.918932	0.358131	0.995568
SLC4A7	355.198	-0.383958	0.526295	-0.729549	0.465666	0.995568
APBA2	283.27	0.371264	0.274867	1.3507	0.176791	0.995568
MAP2K3	797.534	0.473647	0.225965	2.09611	0.0360728	0.995568
TMSB10	1122.38	0.188532	0.203098	0.928278	0.353263	0.995568
ASTE1	17.1677	0.677044	0.541509	1.25029	0.211194	0.995568
RNF19A	454.254	-0.224194	0.382455	-0.586197	0.557743	0.995568
PEX3	362.119	0.128761	0.228206	0.564229	0.572598	0.995568
SH3YL1	127.765	0.180803	0.296498	0.609797	0.541997	0.995568
FAM136A	1008.8	-0.0791918	0.101011	-0.783991	0.433045	0.995568
VCL	592.867	-0.0977834	0.153073	-0.638802	0.522952	0.995568
DEPDC1B	269.674	-0.135466	0.349648	-0.387435	0.698434	0.995568
DAPK2	125.275	0.112501	0.279249	0.402871	0.687043	0.995568
ADSS2	562.669	-0.212476	0.304028	-0.698872	0.484632	0.995568
TIMP2	1753.02	0.155206	0.206944	0.749992	0.45326	0.995568
RFC1	1258.7	-0.210944	0.447538	-0.471343	0.637396	0.995568
CUL3	1342.06	-0.0995201	0.261315	-0.380844	0.703319	0.995568
MYOM2	30.7737	0.3476	0.389875	0.891568	0.372624	0.995568
CYP46A1	7.52606	-1.07328	1.22678	-0.874882	0.381638	0.995568
ZZZ3	575.377	0.102272	0.369828	0.27654	0.782134	0.995568
TUBG2	337.419	0.336888	0.146919	2.29302	0.021847	0.995568
RPL26L1	799.95	-0.0773802	0.164678	-0.469887	0.638435	0.995568
NSUN2	2183.79	-0.227517	0.119562	-1.90292	0.0570516	0.995568
FBXO42	831.28	-0.114709	0.124087	-0.924424	0.355266	0.995568
MFAP3	511.649	-0.386451	0.318324	-1.21402	0.224741	0.995568
MRI1	393.367	0.0423001	0.127197	0.332555	0.73947	0.995568
METTL1	545.548	0.217712	0.257511	0.845444	0.397863	0.995568
HOXC8	2.11641	1.81172	1.47904	1.22493	0.220601	0.995568
TLL1	334.785	0.344407	0.259192	1.32877	0.183924	0.995568
EDC4	1502.14	0.171447	0.140818	1.2175	0.223413	0.995568
TRIO	1044.91	-0.154689	0.237039	-0.652586	0.514023	0.995568
CDH1	11753.2	-0.0951193	0.0772955	-1.23059	0.218476	0.995568
MTREX	951.777	-0.414327	0.365302	-1.1342	0.256709	0.995568
DNAH5	137.024	-0.153531	0.218388	-0.703021	0.482043	0.995568
ZFYVE16	723.379	-0.177988	0.372346	-0.478019	0.632636	0.995568
RIPOR1	1619.48	0.108076	0.22747	0.475123	0.634699	0.995568
RAI14	414.397	-0.389494	0.26372	-1.47692	0.139697	0.995568
PNKP	422.189	0.2682	0.188596	1.42209	0.155001	0.995568
PHLPP2	310.168	-0.115844	0.287298	-0.40322	0.686786	0.995568
SPDL1	242.982	-0.30817	0.469521	-0.65635	0.511599	0.995568
STAU2	826.878	-0.236882	0.274509	-0.86293	0.388176	0.995568
SLC66A1	183.96	0.156084	0.188598	0.827601	0.407896	0.995568
CTNS	5.43455	1.23441	1.46753	0.841152	0.400263	0.995568
RTN4R	186.869	0.113505	0.21516	0.527538	0.59782	0.995568
INPP4A	251.661	-0.169048	0.264469	-0.639199	0.522693	0.995568
RAB27B	119.327	0.335778	0.615384	0.545639	0.585314	0.995568
PSMA4	3163.04	-0.130472	0.31898	-0.40903	0.682518	0.995568
LSG1	1599.53	-0.19822	0.108127	-1.83321	0.0667718	0.995568
PARP3	594.175	0.158528	0.113796	1.39309	0.163593	0.995568
TNC	19.0395	-0.896653	0.549061	-1.63307	0.102455	0.995568
THAP3	349.588	0.265264	0.175457	1.51184	0.130574	0.995568
AIFM2	48.8055	0.401029	0.282799	1.41807	0.15617	0.995568
SPATA7	207.972	-0.071368	0.201928	-0.353434	0.723763	0.995568
MED17	756.601	-0.173641	0.214541	-0.809363	0.418307	0.995568
RETSAT	2129.55	0.117903	0.14673	0.803538	0.421664	0.995568
CAPG	17.8096	1.06892	0.507703	2.1054	0.0352561	0.995568
AP2S1	2076.03	0.299695	0.262745	1.14063	0.254024	0.995568
TG	6.88888	-1.05489	1.07651	-0.979919	0.327126	0.995568
DCUN1D1	329.692	0.486237	0.443722	1.09582	0.27316	0.995568
JADE2	370.66	0.285395	0.189694	1.5045	0.132452	0.995568
ZIC2	451.52	0.121073	0.127586	0.948954	0.342644	0.995568
TRIT1	34.7897	1.05471	0.644021	1.63769	0.101486	0.995568
CUL7	296.325	0.273245	0.258562	1.05679	0.290609	0.995568
PHKA2	59.3442	0.407849	0.409481	0.996013	0.319244	0.995568
CNTLN	187.882	-0.167146	0.439556	-0.380261	0.703752	0.995568
HSPA5	21697.1	-0.169357	0.128914	-1.31372	0.188941	0.995568
DSG2	2722.57	-0.285251	0.351994	-0.810386	0.417718	0.995568
GEMIN8	423.89	0.179921	0.216441	0.831271	0.40582	0.995568
OFD1	47.4432	0.325661	0.757225	0.430072	0.667144	0.995568
GPM6B	65.0583	-0.95444	0.406594	-2.3474	0.0189048	0.995568
MAGEC2	58.0685	-0.134603	0.296024	-0.454702	0.649324	0.995568
PREX2	10.1535	-1.0333	1.11062	-0.930377	0.352176	0.995568
YTHDC2	586.688	-0.248694	0.397951	-0.624937	0.532012	0.995568
CTPS2	765.792	-0.0414526	0.157852	-0.262604	0.792856	0.995568
POLR2B	3209.89	-0.210803	0.259935	-0.810984	0.417375	0.995568
CP	4.422	1.08373	1.28141	0.845729	0.397704	0.995568
KIAA0556	912.162	0.172295	0.175003	0.984527	0.324856	0.995568
DTNBP1	109.41	0.159511	0.258852	0.616223	0.537747	0.995568
ANO2	16.0653	0.272843	0.709097	0.384776	0.700404	0.995568
C12orf4	257.681	-0.1117	0.308102	-0.362542	0.716947	0.995568
SCML1	217.096	-0.233629	0.352703	-0.662395	0.507718	0.995568
WWC3	11.654	0.436485	0.566002	0.771171	0.440606	0.995568
ARHGAP6	824.395	-0.169514	0.148817	-1.13908	0.25467	0.995568
MAP4	8956.88	0.128742	0.164832	0.781049	0.434773	0.995568
GOPC	399.802	-0.14986	0.379273	-0.395124	0.692752	0.995568
USP28	554.328	-0.208386	0.215388	-0.967489	0.333299	0.995568
HDAC9	2.44745	2.00048	1.707	1.17193	0.241227	0.995568
TSPAN17	1705.35	0.215611	0.229184	0.940775	0.34682	0.995568
NOP16	243.319	0.0584627	0.259781	0.225046	0.821943	0.995568
CC2D2A	60.5165	0.228324	0.306292	0.745444	0.456003	0.995568
RRM2B	20.4224	-0.957226	0.653677	-1.46437	0.143092	0.995568
ZNF800	260.683	-0.196639	0.360374	-0.545652	0.585305	0.995568
MRPS10	654.734	-0.128068	0.107083	-1.19596	0.231711	0.995568
RSF1	590.459	-0.399123	0.341388	-1.16912	0.242355	0.995568
VPS13D	1523.71	-0.221602	0.219475	-1.00969	0.312643	0.995568
FAM120A	5358.39	-0.190529	0.0966202	-1.97194	0.0486163	0.995568
R3HDM1	1084.75	-0.245576	0.157643	-1.5578	0.119281	0.995568
COL9A2	135.919	0.0673157	0.213403	0.315439	0.752429	0.995568
ERCC8	26.2355	-0.494597	0.432648	-1.14318	0.252962	0.995568
ADAMTS6	6.90038	-1.40161	1.0106	-1.38691	0.165469	0.995568
H6PD	306.144	0.481239	0.424619	1.13334	0.25707	0.995568
VAMP3	2358.67	0.033429	0.106148	0.31493	0.752815	0.995568
EPN3	1589.55	0.325914	0.229778	1.41839	0.156078	0.995568
LTBP1	46.4636	0.557337	0.405348	1.37496	0.169144	0.995568
RCN1	38.6609	0.695309	0.613091	1.1341	0.256751	0.995568
ELN	10.6687	0.999701	0.677048	1.47656	0.139794	0.995568
RFC2	888.215	0.0662945	0.204964	0.323444	0.746359	0.995568
ARID1B	639.581	-0.253604	0.234986	-1.07923	0.280485	0.995568
CLPTM1L	2657.21	0.227222	0.179632	1.26493	0.205896	0.995568
NEDD4L	4784.87	-0.200774	0.0900171	-2.23039	0.0257213	0.995568
FOXP3	10.1245	1.47377	1.0819	1.36221	0.173133	0.995568
PPP1R3F	65.524	-0.41434	0.435926	-0.950483	0.341867	0.995568
HEXB	2516.71	-0.132729	0.159356	-0.832906	0.404898	0.995568
JKAMP	690.779	-0.117745	0.238777	-0.493118	0.62193	0.995568
ARHGEF5	867.385	0.159111	0.134627	1.18186	0.23726	0.995568
NFE2L3	239.715	-0.20535	0.273361	-0.751204	0.45253	0.995568
MCUR1	895.543	0.076787	0.161553	0.475306	0.634569	0.995568
LIMA1	1075.98	-0.0705557	0.317108	-0.222497	0.823927	0.995568
LETMD1	1427.3	0.183589	0.110988	1.65413	0.0981008	0.995568
LAMC3	33.1562	0.363853	0.463643	0.78477	0.432588	0.995568
COL23A1	11.779	0.652643	0.564987	1.15515	0.24803	0.995568
BCAR1	647.532	0.158768	0.335135	0.473744	0.635682	0.995568
HOMER3	373.976	0.199322	0.265706	0.75016	0.453158	0.995568
RAD51	231.635	0.0778587	0.227672	0.341977	0.732368	0.995568
POLQ	148.347	-0.151513	0.429423	-0.352829	0.724217	0.995568
PIK3CB	1549.5	-0.185666	0.21561	-0.861121	0.389172	0.995568
THOC3	44.7255	-0.408164	0.615978	-0.662628	0.507569	0.995568
HEBP2	2341.16	-0.045066	0.140476	-0.320809	0.748355	0.995568
MPHOSPH9	179.763	-0.431039	0.345125	-1.24894	0.211688	0.995568
PLEKHA5	340.639	-0.119547	0.352658	-0.338989	0.734618	0.995568
PRSS8	2478.94	0.321527	0.273356	1.17622	0.239507	0.995568
SIKE1	425.681	0.308195	0.209903	1.46828	0.142029	0.995568
FNIP2	431.6	-0.379146	0.364263	-1.04086	0.297941	0.995568
MSMO1	747.999	-0.473063	0.232382	-2.03571	0.0417796	0.995568
TTC17	1079.02	-0.0389844	0.148433	-0.262639	0.792829	0.995568
FSTL4	11.4959	0.364105	0.606571	0.600269	0.548327	0.995568
FOXN3	1166.37	-0.0979534	0.21064	-0.465027	0.641912	0.995568
AKR7A2	1031.86	0.164991	0.24404	0.676081	0.498989	0.995568
MRTO4	728.896	-0.0965205	0.202059	-0.477685	0.632874	0.995568
NNAT	4.32832	0.400672	0.930869	0.430427	0.666885	0.995568
USE1	739.642	0.244541	0.281096	0.869956	0.384325	0.995568
MCF2L2	23.1962	0.134915	0.516104	0.26141	0.793776	0.995568
NRIP2	19.4162	-0.330041	0.441347	-0.747803	0.454579	0.995568
LAMA3	947.574	-0.306952	0.20041	-1.53162	0.125616	0.995568
AP5M1	497.196	-0.238239	0.325665	-0.731546	0.464446	0.995568
TRAPPC3	1354.64	0.0586917	0.125069	0.469273	0.638875	0.995568
THRAP3	5864.56	-0.443789	0.213694	-2.07675	0.0378244	0.995568
PHPT1	559.536	0.252522	0.18969	1.33123	0.183112	0.995568
ENTPD2	216.298	0.299038	0.303691	0.984679	0.324782	0.995568
OPN3	24.7898	0.170063	0.401257	0.423826	0.671693	0.995568
SDCCAG8	326.276	0.244508	0.158116	1.54639	0.122011	0.995568
PTPRN	11.902	-1.04078	0.909993	-1.14372	0.25274	0.995568
KIF1B	3064.3	-0.32766	0.167906	-1.95144	0.0510042	0.995568
FOXC1	6.53744	-1.0568	0.795226	-1.32893	0.183872	0.995568
TBC1D22A	588.803	0.160689	0.21931	0.732705	0.463738	0.995568
PLEKHH1	48.5826	-0.241857	0.775101	-0.312033	0.755016	0.995568
ATP9A	350.18	-0.451108	1.29906	-0.347257	0.728398	0.995568
RELT	124.126	-0.370343	0.192084	-1.92803	0.0538514	0.995568
GALC	5.5662	0.396679	0.890563	0.445425	0.656012	0.995568
NOP58	544.977	-0.181815	0.402925	-0.451237	0.651819	0.995568
SZRD1	3611.93	0.0714045	0.18496	0.386054	0.699456	0.995568
CUL1	1487.51	-0.103101	0.193838	-0.531891	0.594802	0.995568
FAM114A2	547.665	-0.144233	0.22117	-0.652139	0.514311	0.995568
CYFIP2	2945.7	0.193271	0.177985	1.08588	0.277532	0.995568
TAB2	1184.11	-0.223676	0.278494	-0.803162	0.421881	0.995568
EIF2AK2	702.739	-0.410895	0.272716	-1.50668	0.131894	0.995568
USP36	942.844	0.386064	0.21902	1.76269	0.0779527	0.995568
KMT2C	644.706	-0.182827	0.350331	-0.52187	0.601761	0.995568
CCDC85A	68.4456	-0.256518	0.432164	-0.593565	0.552803	0.995568
PUM2	1305.68	-0.418733	0.41592	-1.00676	0.314048	0.995568
MRPL43	847.723	0.242711	0.201883	1.20223	0.229274	0.995568
ITIH4	6.86557	0.412822	0.966566	0.427101	0.669306	0.995568
HPF1	458.115	-0.136254	0.202361	-0.673322	0.500742	0.995568
ZFR	1641.94	-0.288952	0.384624	-0.751258	0.452497	0.995568
ZNF280C	35.9184	-0.254903	0.589517	-0.432392	0.665456	0.995568
PHF21B	5.62505	1.56811	1.13167	1.38566	0.165851	0.995568
IL17RB	147.135	-0.104754	0.216296	-0.484309	0.628167	0.995568
TRAF3IP2	376.157	0.152658	0.18467	0.826654	0.408433	0.995568
GYG2	406.355	0.0593825	0.147981	0.401284	0.688211	0.995568
DCBLD2	129.294	0.515203	0.259929	1.98209	0.0474691	0.995568
SOAT1	721.349	-0.277894	0.349893	-0.794226	0.427064	0.995568
PKP2	45.5045	0.207312	0.267317	0.775528	0.438028	0.995568
GDI2	7324.54	-0.18053	0.118909	-1.51822	0.128959	0.995568
PITHD1	601.728	-0.0787387	0.107746	-0.73078	0.464913	0.995568
MTA3	565.552	0.0434559	0.140726	0.308798	0.757475	0.995568
USP13	934.889	-0.211679	0.231739	-0.913436	0.361013	0.995568
ATP11B	1604.01	-0.345991	0.377738	-0.915954	0.359691	0.995568
CDK14	423.05	-0.241111	0.365616	-0.659466	0.509597	0.995568
SEC61A1	17718.3	0.0751697	0.192941	0.389599	0.696833	0.995568
RASGRF1	2.01779	0.639082	1.96526	0.32519	0.745037	0.995568
CAMK2B	636.985	0.0709876	0.142688	0.497501	0.618836	0.995568
CROCC	165.187	-0.215051	0.189228	-1.13646	0.255763	0.995568
POLR3E	1027.84	-0.117416	0.123291	-0.952349	0.34092	0.995568
ATP2B4	159.826	0.135911	0.320375	0.424224	0.671402	0.995568
ZC3H11A	927.085	-0.226796	0.41541	-0.545958	0.585095	0.995568
RIOK2	305.016	-0.257692	0.334061	-0.771393	0.440474	0.995568
YIPF1	920.957	0.223296	0.219593	1.01686	0.30922	0.995568
NDC1	1333.31	-0.200728	0.176393	-1.13796	0.255136	0.995568
UNKL	629.098	-0.0752991	0.195315	-0.385526	0.699848	0.995568
TBXAS1	35.6983	0.296628	0.360468	0.822898	0.410566	0.995568
TARBP1	317.79	-0.700412	0.355392	-1.97082	0.0487446	0.995568
GATB	843.168	0.182158	0.157126	1.15931	0.24633	0.995568
MXD1	176.336	-0.134536	0.228202	-0.589546	0.555495	0.995568
CDK17	158.512	-0.151211	0.39696	-0.380924	0.70326	0.995568
DNAJC25	236.768	-0.309668	0.26297	-1.17758	0.238965	0.995568
PSD	47.121	0.704665	0.35583	1.98034	0.0476652	0.995568
CTDP1	540.182	0.0915728	0.124858	0.733413	0.463307	0.995568
YBX3	4756.16	0.0771347	0.211397	0.36488	0.715201	0.995568
STYK1	218.385	-0.150944	0.293461	-0.514359	0.607001	0.995568
WNK1	3505.83	-0.332609	0.190048	-1.75013	0.0800959	0.995568
CCAR1	1937.28	-0.0934346	0.376195	-0.248367	0.80385	0.995568
OGFR	1273.19	0.128826	0.187159	0.688327	0.491247	0.995568
PIGV	35.7781	-0.678849	0.377211	-1.79965	0.0719153	0.995568
PTPRU	887.256	0.112415	0.211602	0.531255	0.595242	0.995568
SNRNP40	1672.4	-0.139799	0.125508	-1.11387	0.265337	0.995568
MPC1	436.408	0.136468	0.128378	1.06302	0.287773	0.995568
ACAA1	2255.7	0.0578086	0.150516	0.38407	0.700926	0.995568
BCAT1	5.09633	1.44111	1.21813	1.18305	0.23679	0.995568
HDAC7	970.142	0.171818	0.185011	0.92869	0.35305	0.995568
LZTS1	13.9243	0.69082	0.485823	1.42196	0.155038	0.995568
NCKAP1	1849.25	-0.185842	0.445356	-0.417289	0.676467	0.995568
MRPS35	2564.63	-0.0473462	0.147735	-0.320481	0.748604	0.995568
GUCY1B1	6.44362	-1.45945	1.21242	-1.20375	0.228687	0.995568
SFSWAP	83.1236	-0.80915	0.606735	-1.33361	0.182331	0.995568
TNK2	136.436	-0.264627	0.372931	-0.709588	0.47796	0.995568
MON2	813.935	-0.296016	0.347564	-0.851688	0.394387	0.995568
GPBP1	808.029	-0.202357	0.376383	-0.537636	0.590828	0.995568
DGAT2	800.528	0.152408	0.18384	0.829027	0.407089	0.995568
ZNF112	44.7558	0.237912	0.50573	0.470434	0.638045	0.995568
CS	10004.5	0.156959	0.212678	0.738015	0.460505	0.995568
MRPS24	1910.59	0.288656	0.229611	1.25716	0.208697	0.995568
WAPL	552.438	-0.123173	0.337319	-0.365153	0.714998	0.995568
VMP1	2294.93	-0.214684	0.113394	-1.89326	0.0583239	0.995568
APPBP2	1448.4	-0.618285	0.280015	-2.20804	0.0272413	0.995568
SEZ6	4.11025	-2.26342	1.14058	-1.98445	0.0472061	0.995568
EIF4B	8720.89	0.124925	0.176754	0.706776	0.479705	0.995568
SPHK2	577.303	0.0742717	0.28549	0.260155	0.794744	0.995568
RPL18	15823	0.322202	0.248711	1.29549	0.195152	0.995568
ISOC2	1784.62	0.312014	0.286792	1.08794	0.27662	0.995568
EPN1	4096.93	0.308573	0.279931	1.10232	0.270324	0.995568
MED29	2242.73	0.078722	0.17973	0.438001	0.661386	0.995568
ZNF275	14.1257	-1.53198	0.8662	-1.76862	0.0769577	0.995568
MTMR1	1178.53	-0.216539	0.156893	-1.38017	0.167536	0.995568
GPC1	648.864	0.191517	0.225798	0.848181	0.396337	0.995568
ADCK1	412.1	0.340924	0.206172	1.65359	0.0982106	0.995568
HAGH	1221.73	0.167252	0.179957	0.929401	0.352681	0.995568
RNF4	2740.46	-0.0580406	0.0968573	-0.599238	0.549015	0.995568
LIMCH1	5687.72	-0.205349	0.237127	-0.865988	0.386496	0.995568
INTS13	450.383	-0.23793	0.334857	-0.710544	0.477367	0.995568
TM7SF3	2145.58	-0.125457	0.0938363	-1.33698	0.18123	0.995568
DLX3	3.1775	0.599786	1.28673	0.46613	0.641122	0.995568
SPA17	129.404	-0.359736	0.282558	-1.27314	0.202969	0.995568
NGFR	11.4335	0.335251	0.651179	0.514837	0.606667	0.995568
CDON	351.084	0.0730996	0.266847	0.273938	0.784132	0.995568
TAF2	542.386	-0.14867	0.348704	-0.42635	0.669853	0.995568
HIPK2	2638.82	-0.368813	0.220778	-1.67051	0.0948179	0.995568
TNPO3	1529.4	-0.222029	0.106176	-2.09113	0.0365166	0.995568
BORCS8-MEF2B	59.5404	0.866358	0.569571	1.52107	0.128242	0.995568
RFXANK	1307.19	0.399295	0.236482	1.68848	0.0913188	0.995568
TMEM161A	252.277	0.0933548	0.243858	0.382824	0.70185	0.995568
LPAR2	486.948	0.119216	0.248393	0.47995	0.631263	0.995568
CTSA	55.681	-0.168559	0.313797	-0.53716	0.591157	0.995568
SUGP2	1907.46	-0.114918	0.128879	-0.891671	0.372569	0.995568
SLC12A2	818.72	-0.287842	0.400206	-0.719234	0.471996	0.995568
SNX24	99.4449	-0.0705798	0.224965	-0.313736	0.753722	0.995568
EYA2	69.4998	-0.101847	0.305064	-0.333854	0.73849	0.995568
ABCA7	21.2987	0.919457	0.554847	1.65714	0.0974916	0.995568
SNCAIP	4.40332	-1.33496	1.07735	-1.23911	0.215304	0.995568
DDX20	288.309	-0.328312	0.235443	-1.39444	0.163183	0.995568
BTBD1	13.9832	-0.30724	0.811344	-0.378681	0.704925	0.995568
FAR2	27.2575	0.195181	0.541726	0.360295	0.718627	0.995568
BCAS1	25.3355	-0.281477	0.401373	-0.701286	0.483125	0.995568
SBNO2	1850.16	0.0838673	0.237502	0.353123	0.723996	0.995568
PMS1	45.2891	-0.88126	0.438583	-2.00934	0.0445015	0.995568
HMG20B	3410.54	0.223813	0.183913	1.21695	0.223625	0.995568
CALCRL	6.07103	-0.865951	1.2021	-0.720366	0.4713	0.995568
TAF11	15.032	-0.352593	0.764652	-0.461116	0.644715	0.995568
ANKS1A	1054.32	-0.138195	0.10803	-1.27923	0.200815	0.995568
ZNF76	885.984	0.165229	0.160314	1.03066	0.302699	0.995568
SLC9A3R2	1535.68	0.117041	0.246879	0.474084	0.63544	0.995568
NTHL1	342.158	0.264728	0.234444	1.12917	0.258825	0.995568
UHRF1BP1	1278.12	-0.162904	0.193164	-0.843344	0.399036	0.995568
IPO5	4361.62	-0.115986	0.108323	-1.07075	0.284282	0.995568
OAT	3.17792	1.03545	1.31373	0.788178	0.430593	0.995568
WDR3	1746.75	-0.313499	0.170469	-1.83904	0.0659094	0.995568
NTN1	20.8568	-0.453758	0.546783	-0.829869	0.406613	0.995568
GLP2R	16.9259	-1.1733	0.55717	-2.10582	0.0352204	0.995568
MCM10	347.006	-0.201039	0.247669	-0.811723	0.416951	0.995568
DGKA	85.879	0.430456	0.332686	1.29388	0.195706	0.995568
ERBB3	449.122	0.281977	0.205656	1.37111	0.170341	0.995568
ANKRD44	282.747	-0.168824	0.358083	-0.471467	0.637307	0.995568
KARS1	692.767	-0.156492	0.188764	-0.829037	0.407083	0.995568
ADAT1	549.829	-0.078059	0.154737	-0.504462	0.613937	0.995568
PDIA5	972.344	-0.0748035	0.175731	-0.425671	0.670348	0.995568
NDUFB4	7447.1	0.352803	0.219152	1.60986	0.107429	0.995568
SPEN	1215.94	-0.197261	0.151601	-1.30119	0.193194	0.995568
MYLK	37.4185	-1.20315	1.00683	-1.19499	0.232092	0.995568
ZC3H15	599.488	-0.0821709	0.363578	-0.226007	0.821196	0.995568
MAP2K4	1249.01	-0.389088	0.305681	-1.27286	0.203068	0.995568
SNAP91	26.4972	-0.702152	0.537487	-1.30636	0.19143	0.995568
SLK	529.005	-0.140002	0.563674	-0.248375	0.803844	0.995568
COL17A1	3.01932	-0.943494	1.35025	-0.698757	0.484704	0.995568
SEC61A2	194.513	0.0780915	0.181182	0.431011	0.66646	0.995568
TLE2	466.227	0.429403	0.315805	1.35971	0.173922	0.995568
ASB1	943.364	0.232551	0.176571	1.31704	0.187825	0.995568
FAM107B	548.151	-0.160218	0.272192	-0.588621	0.556116	0.995568
ME1	1523.66	-0.107953	0.17404	-0.620276	0.535076	0.995568
CDK13	924.787	-0.246968	0.213739	-1.15547	0.2479	0.995568
SLC9A7	734.436	-0.068343	0.189103	-0.361407	0.717795	0.995568
FOXJ2	937.774	0.0670761	0.149893	0.447492	0.65452	0.995568
PDE4A	21.0537	-0.124103	0.43172	-0.287461	0.77376	0.995568
PPP2R5A	761.422	-0.122133	0.329423	-0.370746	0.710826	0.995568
CTNNA2	10.7713	-0.376615	0.832752	-0.452254	0.651086	0.995568
ELAVL1	3507.68	0.110587	0.202715	0.545528	0.58539	0.995568
DIP2B	1300.98	-0.223234	0.24611	-0.907047	0.364382	0.995568
SMARCD1	680.712	0.140901	0.148498	0.948843	0.342701	0.995568
KDM4A	2588.07	0.0588022	0.0788461	0.745784	0.455798	0.995568
NFYC	1125.15	0.164113	0.226832	0.723502	0.469372	0.995568
ZMYND12	213.61	0.308459	0.191786	1.60835	0.107758	0.995568
SLC9A3	1406.26	-0.0588445	0.110678	-0.531675	0.594951	0.995568
ASPM	80.6796	-0.313815	0.614247	-0.510895	0.609425	0.995568
ELOVL1	3014.76	0.0656122	0.216263	0.303391	0.761592	0.995568
ZNRD1	161.199	0.0718903	0.242561	0.29638	0.76694	0.995568
ZBTB11	12.6193	0.678425	0.645376	1.05121	0.293163	0.995568
ATXN3	98.3209	-0.184031	0.407867	-0.451203	0.651843	0.995568
GOLGA5	940.065	-0.121787	0.297454	-0.409433	0.682222	0.995568
FGFR2	14.128	-1.1526	0.787417	-1.46377	0.143257	0.995568
LRRC40	161.477	0.143344	0.526538	0.272239	0.785438	0.995568
ISOC1	682.185	-0.0616108	0.173646	-0.354807	0.722734	0.995568
EML1	227.611	-0.222544	0.368813	-0.603406	0.546238	0.995568
TRMT11	73.7866	-0.156278	0.446759	-0.349804	0.726486	0.995568
THUMPD1	1094.15	-0.457694	0.387268	-1.18185	0.237264	0.995568
MSANTD3	282.456	-0.155716	0.236324	-0.65891	0.509954	0.995568
KIF26A	11.2181	-0.338567	0.585108	-0.57864	0.562832	0.995568
ATG2B	745.024	-0.243066	0.442457	-0.549356	0.582761	0.995568
ARFGEF1	1039.98	-0.217461	0.372892	-0.583173	0.559777	0.995568
ZFAT	357.177	0.14786	0.206299	0.716729	0.473542	0.995568
MTFR1	1305.88	-0.25731	0.226044	-1.13832	0.254987	0.995568
STAG3	41.8857	-0.250809	0.453855	-0.55262	0.580524	0.995568
FECH	4072.72	-0.15892	0.120237	-1.32172	0.18626	0.995568
MYO9A	337.908	-0.399701	0.459252	-0.870331	0.384119	0.995568
DDX3Y	704.161	-0.26967	0.433594	-0.62194	0.533981	0.995568
PFKP	2764.73	0.258922	0.224474	1.15346	0.248722	0.995568
IDI1	1112.97	-0.199766	0.32142	-0.621511	0.534264	0.995568
SP100	181.133	-0.146385	0.27667	-0.529098	0.596738	0.995568
KLF6	310.783	-0.535822	0.33446	-1.60205	0.109144	0.995568
NEO1	1642.7	-0.0381235	0.113501	-0.335885	0.736957	0.995568
TRAM1	2294.14	-0.258688	0.255092	-1.0141	0.310536	0.995568
PHKA1	722.874	-0.106333	0.0896864	-1.18561	0.235776	0.995568
TNFRSF1A	68.8514	-0.552299	0.545466	-1.01253	0.311286	0.995568
EVI5	183.493	-0.349128	0.553752	-0.630477	0.528383	0.995568
STOML1	532.636	0.208527	0.255342	0.816657	0.414124	0.995568
PKM	34112.2	0.296996	0.276572	1.07385	0.282891	0.995568
DHX29	626.734	-0.203342	0.442522	-0.459507	0.64587	0.995568
DNTTIP2	508.175	-0.252032	0.374103	-0.673696	0.500505	0.995568
METTL22	327.15	0.394201	0.234083	1.68402	0.0921773	0.995568
TP53BP1	728.242	-0.065411	0.288472	-0.22675	0.820618	0.995568
TRO	6.70933	0.617299	0.711267	0.867887	0.385456	0.995568
RRP15	424.057	0.0525452	0.135219	0.388594	0.697577	0.995568
RHOA	13629.4	0.273394	0.248018	1.10231	0.270326	0.995568
DHX8	378.373	-0.0579213	0.251766	-0.23006	0.818045	0.995568
PMS2P4	106.511	0.206907	0.239717	0.863131	0.388066	0.995568
PRKCZ	1490.01	0.190756	0.223282	0.854331	0.392922	0.995568
ZFY	265.337	0.247274	0.386023	0.640568	0.521803	0.995568
IARS2	3664.23	-0.149416	0.224758	-0.664786	0.506187	0.995568
NAV3	111.896	-0.468289	0.520736	-0.899282	0.368502	0.995568
IDH3G	1819.56	0.267062	0.262712	1.01656	0.309363	0.995568
ROGDI	1103.22	0.413376	0.297065	1.39153	0.164063	0.995568
PDZD4	189.557	0.407464	0.298671	1.36426	0.172486	0.995568
CBFB	657.192	-0.364588	0.338569	-1.07685	0.281548	0.995568
HYAL2	1478.25	0.0742112	0.244836	0.303106	0.761809	0.995568
HDAC4	167.859	-0.103512	0.398499	-0.259756	0.795052	0.995568
RASSF1	536.13	-0.145619	0.106039	-1.37326	0.169671	0.995568
FGFR3	10.8464	0.915145	1.24488	0.735128	0.462262	0.995568
IFI35	144.346	0.466768	0.220339	2.11841	0.0341406	0.995568
HEATR6	9.58286	-0.544593	0.92661	-0.587727	0.556716	0.995568
COASY	1860.3	0.134197	0.206589	0.649584	0.515961	0.995568
PLEKHH3	1882.47	0.226149	0.13547	1.66936	0.0950464	0.995568
MEF2A	600.994	-0.118332	0.397883	-0.297403	0.766159	0.995568
OTUD5	1751.68	0.0605582	0.183663	0.329725	0.741608	0.995568
TFE3	1911.88	0.121972	0.1685	0.723871	0.469145	0.995568
TBC1D25	588.63	0.182317	0.233353	0.781293	0.43463	0.995568
ACSL4	60.9474	0.580049	0.545468	1.0634	0.287602	0.995568
INPP5A	1027.5	0.0728938	0.0965591	0.754914	0.4503	0.995568
GPKOW	560.223	0.0820621	0.150249	0.546176	0.584945	0.995568
GRIPAP1	665.388	-0.171259	0.123199	-1.3901	0.1645	0.995568
FTSJ1	979.793	0.0733377	0.210476	0.348437	0.727512	0.995568
PRR11	283.422	-0.167696	0.164271	-1.02085	0.307325	0.995568
REEP1	75.5735	-0.236469	0.309969	-0.762882	0.445534	0.995568
ATP11A	710.785	-0.250942	0.238625	-1.05162	0.292976	0.995568
LAPTM4A	3089.05	-0.0645996	0.0969497	-0.666321	0.505206	0.995568
TTC7A	178.426	0.288785	0.174811	1.65199	0.0985371	0.995568
IP6K2	2862.14	-0.0295077	0.0769831	-0.3833	0.701497	0.995568
SRBD1	227.358	-0.0749011	0.335027	-0.223567	0.823094	0.995568
KIF2A	86.1439	-0.097995	0.421442	-0.232523	0.816132	0.995568
PSME4	2005.45	-0.125885	0.296418	-0.424687	0.671065	0.995568
IFT80	129.164	0.189959	0.603043	0.315001	0.752761	0.995568
SIRT2	2126.57	0.318577	0.243772	1.30687	0.191259	0.995568
PPP2R5B	665.774	0.181104	0.205966	0.879295	0.379241	0.995568
PYGM	6.13042	1.27556	1.09641	1.1634	0.244668	0.995568
PAGE1	34.3263	-0.238296	0.365509	-0.651956	0.51443	0.995568
PITX1	1406.31	0.317923	0.221378	1.43611	0.150971	0.995568
MAST4	484.788	-0.149908	0.228474	-0.656126	0.511743	0.995568
ADAM7	58.1908	-0.474247	0.53357	-0.888819	0.3741	0.995568
NUP133	1571.74	-0.195544	0.127923	-1.5286	0.126363	0.995568
NUCKS1	7384.6	-0.205428	0.233423	-0.880069	0.378822	0.995568
VPS35	2983.94	-0.269659	0.161936	-1.66521	0.0958705	0.995568
DNAJA2	2390.57	-0.184671	0.154334	-1.19656	0.231478	0.995568
BCL3	114.175	0.278907	0.217032	1.2851	0.198758	0.995568
KCNAB2	754.096	0.125156	0.203434	0.615214	0.538413	0.995568
GAL	531.356	0.184624	0.241893	0.763247	0.445316	0.995568
MAOB	2.56304	-0.85244	1.23965	-0.687646	0.491676	0.995568
HES2	30.098	0.159149	0.649859	0.244897	0.806536	0.995568
ATP1B3	3524.34	0.137066	0.139515	0.982451	0.325878	0.995568
MAPK6	2328.39	-0.285892	0.367599	-0.777727	0.43673	0.995568
GNB5	432.012	-0.0574752	0.12358	-0.465086	0.64187	0.995568
RAB27A	169.751	-0.180153	0.185137	-0.973079	0.330514	0.995568
HDHD5	1565.99	0.146005	0.194159	0.751987	0.452059	0.995568
UFD1	1338.12	0.0960691	0.143891	0.667653	0.504355	0.995568
LRP6	520.96	0.363026	0.316854	1.14572	0.251912	0.995568
PHRF1	49.3935	0.70882	1.69206	0.418909	0.675283	0.995568
ELP1	753.415	-0.583018	0.347824	-1.67619	0.0937015	0.995568
NUCB2	943.572	-0.207936	0.376473	-0.552327	0.580724	0.995568
PFN2	2403.93	-0.103391	0.1259	-0.821219	0.411522	0.995568
PTPN3	839.451	-0.112663	0.28193	-0.399612	0.689443	0.995568
SPTB	31.3094	-0.30487	0.561672	-0.542789	0.587275	0.995568
SLC44A1	2020.02	-0.123544	0.248346	-0.497466	0.618861	0.995568
TMEM260	302.551	-0.189374	0.399068	-0.474539	0.635115	0.995568
EXOC5	815.011	-0.229655	0.471679	-0.486888	0.626338	0.995568
CLTCL1	227.739	0.07286	0.171524	0.424779	0.670998	0.995568
FGF22	5.00774	0.255278	0.809717	0.315269	0.752558	0.995568
FSTL3	248.633	0.224274	0.23451	0.956351	0.338895	0.995568
DGCR2	2826.35	0.098043	0.126301	0.776264	0.437593	0.995568
RNF126	1206.43	0.186648	0.194564	0.959314	0.337401	0.995568
MNT	806.548	-0.0599114	0.162188	-0.369394	0.711834	0.995568
ZXDC	721.881	0.0427507	0.0920551	0.464403	0.642359	0.995568
POLB	389.86	0.0356368	0.127193	0.280179	0.77934	0.995568
ST6GALNAC1	189.991	0.230012	0.320392	0.717907	0.472814	0.995568
FRMPD1	205.249	0.12414	0.154915	0.801342	0.422934	0.995568
GBA2	2388.72	0.0631261	0.168533	0.374561	0.707987	0.995568
NDST1	3956.46	0.0549074	0.139604	0.393307	0.694093	0.995568
ASNS	6985.29	0.243957	0.20032	1.21784	0.223285	0.995568
TESK2	298.651	0.152497	0.184178	0.827986	0.407678	0.995568
CSNK2A2	1381.88	0.0470808	0.12136	0.387943	0.698058	0.995568
PTPN21	287.934	-0.403062	0.246319	-1.63634	0.101769	0.995568
EIF2B3	103.616	0.237974	0.381663	0.623519	0.532944	0.995568
TCOF1	887.376	-0.0792883	0.132286	-0.599372	0.548925	0.995568
CDC42	2913.05	-0.214555	0.116683	-1.83878	0.0659473	0.995568
OSBPL3	102.918	-0.333825	0.362837	-0.920041	0.357551	0.995568
EPHA8	3.1481	0.285652	1.18907	0.240231	0.810151	0.995568
ATP2B1	1586.33	0.100848	0.436921	0.230817	0.817457	0.995568
MAP4K4	2302.4	-0.261038	0.153871	-1.69647	0.0897967	0.995568
MGAT4A	114.413	0.20106	0.401319	0.500998	0.616372	0.995568
RPL31	11205.8	0.118605	0.147997	0.801401	0.4229	0.995568
WDR1	6044.36	-0.0749939	0.162958	-0.460203	0.645371	0.995568
SNX13	457.1	-0.250996	0.356267	-0.704517	0.481111	0.995568
ARHGAP10	75.9084	0.208206	0.251461	0.827987	0.407678	0.995568
RPS6KA2	1807.74	0.0311345	0.117514	0.264944	0.791053	0.995568
ING3	193.619	-0.120728	0.36717	-0.328806	0.742302	0.995568
VASH1	312.749	0.0388213	0.171682	0.226123	0.821105	0.995568
BUD23	135.739	0.691156	0.402691	1.71635	0.0860988	0.995568
TRIP13	821.216	0.106765	0.207485	0.514565	0.606857	0.995568
ATP6AP1	5010.39	0.221903	0.220487	1.00642	0.314213	0.995568
TRIB2	15.3073	-0.866482	0.681081	-1.27222	0.203296	0.995568
DAZAP1	1242.48	0.164704	0.169887	0.969486	0.332303	0.995568
MBD3	3726.71	0.128064	0.178358	0.71802	0.472745	0.995568
FAM50A	1392.82	0.0791897	0.13882	0.570448	0.568374	0.995568
FAM3A	836.439	0.302156	0.243754	1.23959	0.215126	0.995568
CPSF1	1427.15	0.311257	0.156355	1.99071	0.0465132	0.995568
RDH11	9644.41	-0.246902	0.198105	-1.24632	0.212648	0.995568
PRKACA	30.0353	0.491848	0.560621	0.877326	0.38031	0.995568
ADGRL1	4060.09	0.103	0.158232	0.650943	0.515084	0.995568
RPS6KA6	619.938	-0.182708	0.334107	-0.546855	0.584478	0.995568
LIMS2	5.76021	0.265834	1.02428	0.259533	0.795224	0.995568
ALDH3A2	620.17	-0.0681766	0.27627	-0.246775	0.805082	0.995568
TFRC	5578.92	-0.262827	0.252629	-1.04037	0.298169	0.995568
SREBF1	7053.76	0.351648	0.146203	2.40521	0.0161632	0.995568
AFF4	2665.53	-0.357847	0.373714	-0.957542	0.338294	0.995568
UBE2D1	275.05	0.080687	0.261004	0.309141	0.757214	0.995568
MPP5	903.257	-0.342873	0.411814	-0.83259	0.405076	0.995568
RHOBTB1	11.2889	0.885793	0.879353	1.00732	0.313779	0.995568
SMC1A	103.264	0.210475	0.326813	0.644023	0.51956	0.995568
HSD17B10	118.312	0.550166	0.268583	2.04841	0.0405202	0.995568
MARK2	1954.09	0.09522	0.136419	0.697995	0.485181	0.995568
HMMR	506.756	0.115105	0.493864	0.233069	0.815707	0.995568
CHFR	564.322	0.0549444	0.118849	0.462304	0.643864	0.995568
NFATC3	1268.83	-0.174157	0.207778	-0.838187	0.401926	0.995568
TRNT1	459.663	-0.10067	0.231724	-0.434438	0.66397	0.995568
ACADVL	8961.07	0.229845	0.153722	1.49519	0.134864	0.995568
FBXW11	2377.45	-0.103255	0.125425	-0.823243	0.41037	0.995568
ACAP1	49.278	0.732432	0.58021	1.26236	0.20682	0.995568
CRMP1	59.8677	-0.438164	0.296593	-1.47732	0.139589	0.995568
EVC	565.698	-0.0468831	0.156613	-0.299357	0.764668	0.995568
NDE1	447.016	0.209451	0.217817	0.961594	0.336254	0.995568
IRAG1	5.84072	1.82925	0.965772	1.89408	0.0582144	0.995568
AP1M1	1157.01	0.227061	0.21257	1.06817	0.285445	0.995568
PVR	978.104	-0.0642334	0.18046	-0.355943	0.721883	0.995568
XRCC1	251.152	0.289566	0.2552	1.13467	0.256515	0.995568
SCARB1	2202.23	0.277089	0.254385	1.08925	0.276043	0.995568
CYP2W1	4.8481	0.313912	1.00997	0.310812	0.755944	0.995568
MCM2	2767.98	0.250043	0.247989	1.00828	0.313319	0.995568
MOV10L1	31.8554	1.07796	0.50488	2.13508	0.0327543	0.995568
SELENOO	405.337	0.134826	0.12769	1.05589	0.29102	0.995568
PDE8A	260.372	-0.101634	0.292967	-0.346914	0.728656	0.995568
NLE1	1597.35	0.287692	0.296468	0.970397	0.331849	0.995568
SDHA	3720.39	0.0333037	0.119345	0.279055	0.780203	0.995568
SMARCE1	3527.8	-0.0235877	0.103201	-0.22856	0.819211	0.995568
ADAM11	255.834	0.462288	0.318599	1.451	0.146779	0.995568
FERMT2	271.021	-0.29313	0.2767	-1.05938	0.289428	0.995568
IGF2BP2	1.95739	-1.20719	1.84186	-0.65542	0.512198	0.995568
MAP3K13	835.879	-0.11388	0.221816	-0.513397	0.607674	0.995568
ST6GAL1	172.318	-0.252044	0.202593	-1.24409	0.213466	0.995568
PICALM	1983.27	-0.221567	0.294363	-0.7527	0.45163	0.995568
MRPS34	405.206	0.437946	0.302896	1.44586	0.148217	0.995568
NOTCH3	959.406	0.186701	0.22496	0.829931	0.406578	0.995568
CLNS1A	1448.57	-0.155315	0.152668	-1.01734	0.308991	0.995568
PPP2R2C	856.457	-0.0630227	0.146676	-0.429673	0.667434	0.995568
TEAD2	36.607	-0.259043	0.430675	-0.601481	0.54752	0.995568
EED	325.324	-0.26543	0.160078	-1.65813	0.0972916	0.995568
CDHR2	5.59077	-3.34347	1.40952	-2.37206	0.0176894	0.995568
TSG101	1916.51	0.0667491	0.0996929	0.669547	0.503147	0.995568
NCBP3	1038.22	-0.112473	0.147943	-0.760245	0.447108	0.995568
ATP2A3	2.5725	1.42907	1.36876	1.04406	0.296457	0.995568
CA12	366.206	-0.0869139	0.155816	-0.557799	0.576982	0.995568
BCS1L	614.987	0.0815011	0.157722	0.51674	0.605338	0.995568
NUAK1	316.162	-0.0634452	0.273198	-0.232232	0.816358	0.995568
DPP8	607.353	-0.0816433	0.214221	-0.381118	0.703116	0.995568
SLC24A1	279.924	0.108451	0.238421	0.454873	0.649201	0.995568
ZNF532	741.247	-0.502858	0.257267	-1.95462	0.0506281	0.995568
SCARF1	2.60394	-4.99737	4.25957	-1.17321	0.240712	0.995568
LMAN1	2774.05	-0.280354	0.321956	-0.870784	0.383872	0.995568
HACD3	3898.43	-0.354423	0.248267	-1.42759	0.153411	0.995568
IPCEF1	5.40301	0.379902	1.0618	0.357791	0.7205	0.995568
ZZEF1	1752.15	-0.156911	0.10914	-1.4377	0.150519	0.995568
ENO1	48180.3	0.384347	0.30702	1.25186	0.210619	0.995568
ANO8	157.595	0.221009	0.164393	1.3444	0.17882	0.995568
TUBE1	181.507	0.108594	0.243035	0.446822	0.655003	0.995568
ARHGEF10L	343.198	0.146062	0.176621	0.826978	0.408249	0.995568
KCNQ2	54.5399	0.208163	0.410735	0.506807	0.61229	0.995568
TACR2	3.00784	0.233147	0.890126	0.261926	0.793378	0.995568
ACTR6	283.928	0.342175	0.419221	0.816217	0.414376	0.995568
TIPIN	310.948	0.111541	0.149735	0.744922	0.456319	0.995568
SRI	644.049	0.164135	0.204891	0.801086	0.423082	0.995568
EIF4G3	1189.86	-0.0875269	0.163047	-0.53682	0.591392	0.995568
NUP37	279.462	0.119753	0.127197	0.94148	0.346459	0.995568
GTSE1	654.021	-0.1371	0.145195	-0.944241	0.345046	0.995568
SEMA3C	562.75	-0.263179	0.444893	-0.591557	0.554147	0.995568
TTC38	1085.89	0.137168	0.203099	0.675374	0.499438	0.995568
ACAT1	6.00848	-2.89081	1.29375	-2.23445	0.0254534	0.995568
ZNF638	610.744	-0.380238	0.501883	-0.757624	0.448676	0.995568
SLC25A40	425.284	-0.374286	0.211604	-1.76881	0.0769264	0.995568
TIMM21	625.912	-0.113769	0.20803	-0.546886	0.584457	0.995568
ADD2	34.268	0.23127	0.3584	0.645286	0.518742	0.995568
VPS9D1	194.969	0.276145	0.237724	1.16162	0.245389	0.995568
ZNF37A	317.758	-0.207087	0.406251	-0.509751	0.610226	0.995568
MARK3	1505.68	-0.186634	0.261537	-0.713605	0.475471	0.995568
SLC25A3	785.977	0.225684	0.191085	1.18107	0.237576	0.995568
FNDC3B	500.367	-0.266293	0.126383	-2.10703	0.0351146	0.995568
CACNG4	17.199	-0.428669	0.573053	-0.748044	0.454434	0.995568
FRYL	372.243	-0.557612	0.417504	-1.33558	0.181685	0.995568
TMEM131	1037.66	-0.252361	0.200253	-1.26021	0.207595	0.995568
FSCN1	296.578	0.210674	0.257248	0.818954	0.412813	0.995568
MOCOS	919.331	0.0634424	0.13805	0.45956	0.645832	0.995568
ATP12A	3.78664	1.3135	2.87781	0.456424	0.648085	0.995568
WDR62	248.691	0.228866	0.186841	1.22492	0.220606	0.995568
DLG1	756.799	-0.179073	0.359922	-0.497532	0.618814	0.995568
RAB7A	122.03	-1.09643	1.20682	-0.908521	0.363603	0.995568
BCAP29	489.029	0.27977	0.309316	0.90448	0.365741	0.995568
SEC31B	10.2888	-0.309139	0.953806	-0.324111	0.745854	0.995568
SART3	1694.42	-0.0444333	0.10309	-0.431012	0.666459	0.995568
PAX2	2.26398	1.43604	1.92863	0.744593	0.456518	0.995568
EXOSC7	972.625	0.0949019	0.162427	0.584272	0.559037	0.995568
MKRN2	588.948	-0.0760837	0.160392	-0.474362	0.635242	0.995568
MCM6	1549.24	-0.0741261	0.150295	-0.493205	0.621868	0.995568
REXO2	1213.58	-0.0738696	0.147537	-0.500687	0.616592	0.995568
RBMS2	262.047	0.526178	0.256982	2.04753	0.0406059	0.995568
BAZ2A	1993.85	-0.0746047	0.114807	-0.649827	0.515804	0.995568
PTPN23	1808.45	0.2033	0.272099	0.747153	0.454971	0.995568
UNG	968.877	-0.0366037	0.161678	-0.226399	0.820891	0.995568
FMO4	41.4319	-0.318326	0.287883	-1.10575	0.268837	0.995568
KLHL20	587.876	-0.219769	0.279779	-0.785509	0.432155	0.995568
RGS11	39.2134	0.62611	0.41762	1.49923	0.133813	0.995568
SLC46A1	2595.85	0.0726878	0.18359	0.395924	0.692161	0.995568
PLXNA2	52.7156	-0.369749	0.483188	-0.765227	0.444136	0.995568
ANKRD13A	246.304	-0.180476	0.278315	-0.648462	0.516686	0.995568
TPD52	3374.71	-0.244301	0.203702	-1.19931	0.230408	0.995568
ACACB	226.717	0.273885	0.247599	1.10616	0.268655	0.995568
TRAF4	4987.4	0.285244	0.232147	1.22872	0.219176	0.995568
PAG1	178.919	-0.497582	0.471688	-1.0549	0.291473	0.995568
GPATCH1	8.75083	1.87333	1.12573	1.66411	0.0960908	0.995568
ICAM3	624.08	0.249105	0.293004	0.850175	0.395228	0.995568
NT5C2	1463.2	-0.25854	0.279138	-0.926208	0.354338	0.995568
GPC4	300.126	0.0772463	0.12543	0.61585	0.537993	0.995568
MBNL3	156.411	-0.266505	0.359375	-0.74158	0.458342	0.995568
CAMSAP3	570.615	0.153324	0.128998	1.18858	0.234606	0.995568
RAP1GAP	326.085	0.143815	0.226361	0.635336	0.525209	0.995568
XAB2	1573.46	0.272766	0.235269	1.15938	0.246302	0.995568
ARHGEF1	296.058	0.214989	0.363604	0.591273	0.554338	0.995568
STXBP2	1848.05	0.277818	0.210251	1.32136	0.18638	0.995568
MAP2K7	111.86	-0.211226	0.423417	-0.498862	0.617877	0.995568
DGKD	16.7965	1.61834	0.798397	2.02698	0.042664	0.995568
CTTNBP2	6.32849	-1.48427	1.03469	-1.43451	0.151428	0.995568
RARB	72.5445	-0.540102	0.285987	-1.88855	0.0589519	0.995568
TOP2B	2043.83	-0.211892	0.459015	-0.461623	0.644352	0.995568
TM9SF3	3347.28	-0.496145	0.367345	-1.35063	0.176816	0.995568
NFKB2	829.528	0.124505	0.216496	0.575094	0.565228	0.995568
UBE2T	798.516	0.179657	0.122771	1.46336	0.14337	0.995568
PPP1R12B	465.282	-0.445051	0.238888	-1.86301	0.0624611	0.995568
DNAJC10	1074.13	-0.1717	0.386212	-0.444575	0.656627	0.995568
GTF3C1	4850.62	0.123505	0.156324	0.790059	0.429493	0.995568
IL4R	156.568	0.455892	0.19898	2.29114	0.0219553	0.995568
USP33	999.37	-0.167426	0.400484	-0.41806	0.675904	0.995568
PAK3	16.0937	-1.669	0.712453	-2.34261	0.0191496	0.995568
SNRPA	1760.78	0.380641	0.275157	1.38336	0.166555	0.995568
EXOSC5	294.295	0.149598	0.243772	0.613681	0.539426	0.995568
DYNC1I2	1071.34	-0.175532	0.225054	-0.779954	0.435418	0.995568
LRCH4	1062.65	0.297347	0.215018	1.38289	0.166698	0.995568
SIRT6	618.307	0.253104	0.223272	1.13361	0.256957	0.995568
GPR137B	302.638	-0.07954	0.148959	-0.533971	0.593362	0.995568
NAALAD2	12.5326	0.63509	0.738674	0.85977	0.389916	0.995568
JADE1	453.413	0.0599793	0.153719	0.390187	0.696398	0.995568
UBE2A	1664.8	-0.0676915	0.0881188	-0.768185	0.442377	0.995568
FGFR1	374.959	0.240941	0.239132	1.00756	0.313664	0.995568
MAP2	93.3743	-0.655122	0.312678	-2.0952	0.0361535	0.995568
ARAF	1488.85	0.247834	0.276139	0.897498	0.369453	0.995568
NEBL	214.634	-0.283976	0.306336	-0.92701	0.353922	0.995568
ACER3	349.611	0.218449	0.338592	0.645167	0.518819	0.995568
UBE2K	2732.83	-0.100203	0.0932029	-1.0751	0.282329	0.995568
PIK3C3	604.62	-0.100516	0.272315	-0.369116	0.712041	0.995568
N4BP2	139.858	0.162594	0.635899	0.255692	0.798189	0.995568
TIGAR	339.172	-0.336382	0.287925	-1.1683	0.242688	0.995568
TULP3	838.94	-0.104023	0.110843	-0.938468	0.348004	0.995568
SYNJ2	74.9858	0.307509	0.314424	0.978008	0.328071	0.995568
PPP2R5C	1867.67	-0.120467	0.188246	-0.639945	0.522208	0.995568
MLLT10	326.001	-0.0872914	0.228448	-0.382106	0.702382	0.995568
ZCWPW1	70.8944	0.128808	0.247524	0.520385	0.602796	0.995568
NRDC	184.254	0.466033	0.439769	1.05972	0.289271	0.995568
TNRC6C	366.597	-0.251154	0.226177	-1.11043	0.266813	0.995568
CBFA2T2	1870.91	0.150825	0.151193	0.997564	0.318491	0.995568
ITCH	826.379	-0.203396	0.27878	-0.729593	0.465639	0.995568
PKD2L2	9.42405	-0.169751	0.635549	-0.267094	0.789397	0.995568
TP53INP2	827.615	0.124432	0.172788	0.720142	0.471437	0.995568
SDF4	4664.58	0.189921	0.230333	0.824549	0.409627	0.995568
TP73	166.435	0.223046	0.296295	0.752784	0.45158	0.995568
TOLLIP	2259.75	0.12685	0.203163	0.624372	0.532383	0.995568
UBE2D4	952.953	0.12419	0.22639	0.548564	0.583305	0.995568
THOC1	255.409	-0.0855106	0.374568	-0.228291	0.81942	0.995568
OSBPL6	96.1013	0.135385	0.31167	0.434386	0.664008	0.995568
SLC1A3	22.7135	0.372394	0.752043	0.495176	0.620476	0.995568
XRCC5	9288.51	-0.186474	0.104146	-1.7905	0.073373	0.995568
MKNK1	359.992	0.175275	0.153633	1.14087	0.253924	0.995568
REXO1	503.307	0.158404	0.185179	0.855412	0.392323	0.995568
SAR1A	1990.91	-0.0367031	0.115085	-0.318921	0.749786	0.995568
CDC14A	71.5934	-0.194441	0.392605	-0.495259	0.620418	0.995568
CEACAM1	14.2113	-1.01123	0.657749	-1.53741	0.124193	0.995568
SENP1	454.805	-0.263529	0.248034	-1.06247	0.288023	0.995568
CIC	1335.38	0.212587	0.185836	1.14395	0.252645	0.995568
FDFT1	2662.49	-0.104782	0.177049	-0.591826	0.553967	0.995568
PAFAH1B3	1118.3	0.2811	0.263717	1.06591	0.286463	0.995568
OPHN1	360.701	-0.520091	0.310363	-1.67575	0.0937874	0.995568
KIF22	249	-0.372913	0.185054	-2.01516	0.0438879	0.995568
CARMIL1	437.85	-0.454665	0.314981	-1.44347	0.148889	0.995568
PGM1	1394.55	0.197198	0.21582	0.913717	0.360866	0.995568
DDX1	1687.24	-0.255394	0.222358	-1.14857	0.250733	0.995568
DNM2	3529.36	0.166115	0.152229	1.09122	0.275177	0.995568
RIMS1	763.887	-0.116614	0.282101	-0.413376	0.679331	0.995568
STX7	479.021	-0.117514	0.2703	-0.434753	0.663742	0.995568
RABL2B	477.53	-0.0326992	0.140533	-0.23268	0.81601	0.995568
KEAP1	2819.01	0.100039	0.148056	0.675686	0.49924	0.995568
DDX43	99.4551	0.347284	0.467505	0.742847	0.457575	0.995568
PTPRH	2.2202	1.06726	1.54307	0.691647	0.489159	0.995568
SLC35C2	1183.96	0.112607	0.24681	0.456251	0.648209	0.995568
CRYBG3	241.787	-0.604781	0.46508	-1.30038	0.193471	0.995568
EPHA6	165.622	0.0537063	0.201756	0.266195	0.790089	0.995568
RFX3	133.194	0.444933	0.37294	1.19304	0.232853	0.995568
RAB21	938.651	-0.0949604	0.26081	-0.364099	0.715784	0.995568
SLC4A4	1278.75	-0.330113	0.241329	-1.3679	0.171344	0.995568
SMARCA2	1018.64	-0.165745	0.209036	-0.792901	0.427836	0.995568
MID2	387.525	0.0647971	0.147085	0.44054	0.659546	0.995568
PUM3	198.506	-0.261505	0.350039	-0.747074	0.455019	0.995568
CHRNA3	18.2073	0.137547	0.410919	0.334731	0.737828	0.995568
PSEN1	1857.79	-0.127246	0.0995893	-1.27771	0.201353	0.995568
CPOX	404.643	-0.146676	0.291395	-0.50336	0.614711	0.995568
CLDND1	646.872	-0.10041	0.257031	-0.390653	0.696054	0.995568
MOK	144.253	0.0855791	0.200489	0.426851	0.669488	0.995568
DLGAP4	1407.52	0.103858	0.200927	0.516893	0.605231	0.995568
IGSF9B	16.0136	-0.930268	2.40022	-0.387577	0.698329	0.995568
CROCCP3	13.6534	-2.11119	0.926699	-2.27818	0.0227159	0.995568
NDC80	482.145	-0.178133	0.32016	-0.556388	0.577945	0.995568
AP4E1	115.544	-0.407636	0.398592	-1.02269	0.306455	0.995568
RSBN1	452.249	-0.228491	0.231592	-0.986611	0.323833	0.995568
TCF7	13.9464	-0.328062	0.529457	-0.61962	0.535508	0.995568
CDH7	5.37857	0.798179	1.03901	0.768211	0.442362	0.995568
PCNP	690.366	0.192235	0.217943	0.882042	0.377754	0.995568
EXD2	1267.88	-0.0322051	0.10205	-0.315581	0.752321	0.995568
ARG2	2206.79	0.0655652	0.135647	0.483353	0.628845	0.995568
UBA5	630.166	-0.23901	0.258785	-0.923584	0.355703	0.995568
STK17B	179.103	-0.651481	0.533942	-1.22013	0.222414	0.995568
CDC14B	85.9288	-1.00997	0.678544	-1.48843	0.136637	0.995568
JMJD4	1162.23	0.227994	0.246021	0.926723	0.35407	0.995568
DELE1	1652.9	0.0304917	0.11649	0.261753	0.793512	0.995568
CADPS2	361.652	-0.283868	0.276906	-1.02514	0.305297	0.995568
PCDHA6	1.90987	-1.46707	1.53877	-0.953405	0.340385	0.995568
PCDHGA2	61.5762	-0.142827	0.261358	-0.546479	0.584737	0.995568
HSPB11	400.164	0.0407106	0.151594	0.268551	0.788276	0.995568
PHLPP1	647.911	-0.07183	0.104803	-0.68538	0.493104	0.995568
ATP8B1	59.9417	1.51545	0.982377	1.54264	0.122919	0.995568
SMARCD3	447.173	0.420164	0.293518	1.43147	0.152294	0.995568
WDR70	70.651	-0.284283	1.03436	-0.274839	0.78344	0.995568
BZW1	4187.17	-0.218623	0.276955	-0.78938	0.42989	0.995568
C1QTNF3	32.9214	0.161242	0.600906	0.268332	0.788444	0.995568
ME2	1336.06	-0.142425	0.220781	-0.645098	0.518864	0.995568
C5orf22	713.147	-0.153483	0.240898	-0.637128	0.524041	0.995568
FAM135A	148.874	-0.6154	0.562663	-1.09373	0.274075	0.995568
EPB41L3	9.57188	0.770476	0.860795	0.895076	0.370747	0.995568
COBLL1	1048.32	-0.127354	0.366149	-0.347818	0.727977	0.995568
DLG3	1515.6	-0.303932	0.19063	-1.59436	0.110856	0.995568
TRAF5	17.2974	0.476821	0.506583	0.941248	0.346578	0.995568
GEMIN5	851.929	-0.0866922	0.136266	-0.636199	0.524647	0.995568
OPRK1	534.099	0.458946	0.39126	1.173	0.240797	0.995568
NFE2L1	6682.7	-0.081482	0.0947	-0.860422	0.389556	0.995568
GSK3B	512.562	0.088544	0.171523	0.516222	0.6057	0.995568
ITGB5	1002.65	0.124049	0.196355	0.631755	0.527547	0.995568
ERC1	1103.58	-0.149197	0.135793	-1.09871	0.271894	0.995568
XPO1	542.516	-0.102448	0.291037	-0.352011	0.72483	0.995568
RNF13	142.777	1.27422	0.551578	2.31013	0.0208809	0.995568
PALB2	6.44827	-0.228572	1.02757	-0.222439	0.823972	0.995568
DOP1A	242.416	-0.196736	0.436734	-0.450471	0.652371	0.995568
LYRM2	450.515	-0.137083	0.242554	-0.565167	0.57196	0.995568
BCKDHB	459.826	-0.124351	0.227086	-0.547591	0.583972	0.995568
KAT6A	1184.25	-0.414918	0.261615	-1.58599	0.112742	0.995568
TUT7	562.316	-0.582182	0.374783	-1.55338	0.120332	0.995568
ULK2	698.391	-0.108596	0.176326	-0.615883	0.537972	0.995568
TNPO1	2680.75	-0.122876	0.360222	-0.341111	0.73302	0.995568
PLOD1	4424.45	0.271267	0.270795	1.00174	0.316468	0.995568
P2RX5	52.0796	-0.197352	0.449211	-0.439331	0.660422	0.995568
ITGAE	350.95	-0.0639435	0.153152	-0.417517	0.6763	0.995568
DIS3	217.942	-0.093507	0.414874	-0.225387	0.821678	0.995568
PIBF1	17.3344	0.36497	0.628657	0.580554	0.561541	0.995568
NUFIP1	211.275	-0.19655	0.163963	-1.19874	0.230628	0.995568
PDS5B	843.149	-0.341475	0.384573	-0.887935	0.374576	0.995568
OXCT1	2030.59	-0.193597	0.206191	-0.938919	0.347773	0.995568
RRAGB	6.9806	-0.425252	1.26886	-0.335145	0.737516	0.995568
SLC27A5	513.493	0.423408	0.296483	1.4281	0.153262	0.995568
ZNF324	370.486	0.180286	0.217106	0.830405	0.40631	0.995568
ZNF671	162.56	-0.143937	0.157768	-0.912332	0.361594	0.995568
ZNF416	297.772	0.216677	0.190565	1.13702	0.255528	0.995568
ZNF586	350.432	-0.284649	0.181892	-1.56494	0.117598	0.995568
ZNF446	245.857	0.219978	0.19823	1.10971	0.267123	0.995568
ZNF264	464.337	-0.0669953	0.153863	-0.435423	0.663256	0.995568
RPS5	24427.4	0.371305	0.278622	1.33265	0.182647	0.995568
FAT1	3019.64	-0.344495	0.198198	-1.73813	0.0821873	0.995568
CHMP2B	752.355	-0.0958808	0.306162	-0.313171	0.754151	0.995568
SMAP2	1662.8	0.126898	0.14692	0.863719	0.387742	0.995568
PPIE	139.835	-0.0873752	0.255329	-0.342207	0.732195	0.995568
ZMPSTE24	1870.54	-0.272734	0.287405	-0.948955	0.342643	0.995568
STARD7	3544.15	-0.160969	0.118988	-1.35282	0.176114	0.995568
REST	221.532	0.851488	0.970016	0.877808	0.380048	0.995568
SSH1	991.389	-0.187578	0.119184	-1.57385	0.115522	0.995568
APLP2	10708.8	-0.157306	0.0928279	-1.6946	0.0901518	0.995568
FAM234B	573.956	-0.0457627	0.141711	-0.32293	0.746748	0.995568
WBP11	2518.22	0.0526621	0.125327	0.420198	0.674341	0.995568
EIF3I	8602.6	0.14752	0.224598	0.656817	0.511298	0.995568
NKAIN1	21.516	-0.201829	0.494809	-0.407894	0.683352	0.995568
COL16A1	62.9175	-0.283072	0.411448	-0.687989	0.49146	0.995568
TXLNA	2718.18	-0.109387	0.0730176	-1.49809	0.13411	0.995568
NCOA1	1381.55	-0.0937466	0.2682	-0.34954	0.726684	0.995568
AGBL5	1436.96	0.185845	0.219435	0.846927	0.397036	0.995568
KIF3C	270.502	-0.0548977	0.225893	-0.243025	0.807986	0.995568
RAB10	2748.86	-0.197804	0.199983	-0.989102	0.322613	0.995568
HADHA	7950.1	0.0967915	0.18411	0.525725	0.599079	0.995568
MAPRE3	242.015	0.11756	0.147811	0.795341	0.426415	0.995568
CAD	2277.18	0.191494	0.234498	0.816615	0.414149	0.995568
CD59	1425.55	0.0351733	0.0864229	0.406991	0.684015	0.995568
CD82	298.8	0.464999	0.237589	1.95716	0.0503283	0.995568
BCORL1	355.103	0.0413912	0.184878	0.223884	0.822848	0.995568
ATRX	611.72	-0.11898	0.474685	-0.250651	0.802084	0.995568
MYNN	440.958	0.106606	0.465172	0.229175	0.818733	0.995568
MECOM	31.4849	-0.59739	0.580515	-1.02907	0.303448	0.995568
SCAMP1	1366.67	-0.312022	0.326057	-0.956955	0.33859	0.995568
HACE1	165.835	-0.122108	0.485475	-0.251523	0.80141	0.995568
SEH1L	1360.49	-0.327325	0.200837	-1.6298	0.103143	0.995568
WDR47	281.641	-0.290886	0.436564	-0.666308	0.505214	0.995568
OVGP1	5.67436	-0.612882	0.780172	-0.785574	0.432117	0.995568
SLC25A24	233.841	0.117944	0.394358	0.299077	0.764881	0.995568
IGSF9	387.177	0.110552	0.21601	0.511789	0.608799	0.995568
ZNF213	222.788	0.175632	0.350576	0.500981	0.616385	0.995568
AKR1B1	3.22824	-0.644505	1.28122	-0.503042	0.614935	0.995568
CPNE3	11674	-0.190615	0.260103	-0.732844	0.463654	0.995568
CTTN	2472.43	-0.128977	0.186311	-0.692267	0.48877	0.995568
MTIF2	94.9036	-0.886797	0.560481	-1.58221	0.113602	0.995568
DDHD2	267.652	-0.448468	0.444784	-1.00828	0.313318	0.995568
TTC39A	554.521	0.332482	0.235076	1.41436	0.157257	0.995568
EPS15	1478.21	-0.195521	0.245035	-0.797932	0.42491	0.995568
ORC1	358.012	0.167127	0.220446	0.758134	0.448371	0.995568
MGST2	1858.38	0.150923	0.166277	0.907661	0.364057	0.995568
CHERP	1953.15	0.069896	0.15675	0.445909	0.655663	0.995568
USP40	1364.37	-0.14029	0.184349	-0.761003	0.446655	0.995568
POMGNT1	4244.63	0.331469	0.262873	1.26095	0.207328	0.995568
RAD54L	422.567	0.282684	0.224972	1.25653	0.208923	0.995568
MAST2	864.663	0.231747	0.211656	1.09492	0.273551	0.995568
DNAJA1	5434.31	-0.397151	0.262168	-1.51488	0.129804	0.995568
AQP6	4.32861	0.767303	1.04984	0.730879	0.464853	0.995568
DIMT1	1021.59	-0.0409615	0.0870172	-0.470729	0.637834	0.995568
IPO11	18.4432	0.76	0.826861	0.919138	0.358023	0.995568
FOLH1	30459.3	-0.0842726	0.153832	-0.547824	0.583813	0.995568
SNX10	21.0142	0.3958	1.03697	0.381688	0.702693	0.995568
SEPHS1	2395.32	0.0308012	0.0997589	0.308757	0.757507	0.995568
MRPL28	152.734	0.236542	0.690798	0.342419	0.732035	0.995568
HBQ1	28.2233	0.476401	0.550558	0.865306	0.386871	0.995568
ITPKC	448.014	0.066491	0.173248	0.38379	0.701134	0.995568
FAT2	3.49009	-0.422095	0.99567	-0.423931	0.671616	0.995568
RBM22	991.708	0.0528862	0.0800057	0.66103	0.508593	0.995568
TMED2	7356.82	-0.14035	0.117723	-1.1922	0.233181	0.995568
ERO1B	2.58709	-4.80134	2.32222	-2.06756	0.0386814	0.995568
ZFAND6	809.335	-0.0875285	0.238719	-0.366659	0.713874	0.995568
TXLNG	311.758	-0.170133	0.367375	-0.463105	0.643289	0.995568
PPEF1	3.39224	0.821863	1.23624	0.66481	0.506172	0.995568
LAT2	28.0202	-0.541107	0.361509	-1.4968	0.134444	0.995568
HUWE1	9812.29	-0.122758	0.123945	-0.990423	0.321967	0.995568
ZW10	705.604	-0.148226	0.206263	-0.718626	0.472371	0.995568
ALG9	820.569	0.163714	0.222673	0.73522	0.462205	0.995568
MYBPC2	1.97237	3.58359	2.21687	1.61651	0.105985	0.995568
MTMR2	885.568	-0.331015	0.220556	-1.50082	0.133403	0.995568
HSD17B14	59.4635	0.238979	0.332401	0.718947	0.472173	0.995568
TRIP6	32.7	0.398477	0.354888	1.12282	0.261512	0.995568
FTL	9878.27	0.294304	0.260165	1.13122	0.257961	0.995568
SRRT	2928.2	0.184269	0.134804	1.36694	0.171644	0.995568
BAX	771.231	0.199453	0.263805	0.756061	0.449613	0.995568
NLK	309.653	-0.149896	0.292437	-0.512574	0.608249	0.995568
PIGS	2616.35	0.109497	0.165909	0.659982	0.509266	0.995568
TMPRSS11E	15.0137	-0.123255	0.54023	-0.228154	0.819527	0.995568
ATXN7L3	1150.52	0.0559515	0.193653	0.288926	0.772638	0.995568
PGS1	399.452	0.13845	0.135887	1.01886	0.30827	0.995568
PSMC5	3639.62	0.0900312	0.131192	0.686256	0.492552	0.995568
UIMC1	442.298	-0.106101	0.20324	-0.52205	0.601635	0.995568
MT3	10.5175	1.46913	1.19575	1.22863	0.219212	0.995568
LPCAT2	43.2782	0.258148	0.419494	0.61538	0.538304	0.995568
OGFOD1	850.846	-0.411226	0.171169	-2.40245	0.0162857	0.995568
SH3BP2	1032.43	0.106342	0.130961	0.812014	0.416783	0.995568
ADD1	5273.49	0.0337448	0.116506	0.289641	0.772091	0.995568
L2HGDH	383.97	-0.1089	0.282062	-0.386086	0.699433	0.995568
TXNDC16	358.577	-0.418386	0.368019	-1.13686	0.255597	0.995568
GMCL1	290.177	-0.343901	0.431497	-0.796995	0.425454	0.995568
SF3B2	549.684	0.105647	0.154115	0.685508	0.493024	0.995568
KLHL42	1083.18	-0.0653537	0.256721	-0.254571	0.799054	0.995568
GNAS	35549.3	0.160269	0.192373	0.833114	0.40478	0.995568
DNM1L	1267.82	-0.530935	0.344311	-1.54202	0.123068	0.995568
PTHLH	7.51807	0.202543	0.822375	0.246291	0.805457	0.995568
TFAP2C	430.259	-0.0762878	0.14385	-0.530328	0.595884	0.995568
AURKA	837.234	-0.0922613	0.191933	-0.480695	0.630734	0.995568
PIR	663.879	-0.122718	0.127499	-0.962506	0.335796	0.995568
AAMDC	183.595	0.289383	0.174572	1.65767	0.0973844	0.995568
ALG6	433.788	-0.158625	0.144977	-1.09414	0.273895	0.995568
CNOT3	1333.56	0.0668579	0.199986	0.334313	0.738143	0.995568
PTPN4	264.203	0.152265	0.418525	0.363813	0.715998	0.995568
DDX18	941.197	-0.309077	0.284324	-1.08706	0.277011	0.995568
ASAP3	302.933	0.257458	0.170403	1.51088	0.130818	0.995568
EDEM2	704.462	0.232432	0.209703	1.10838	0.267696	0.995568
DNMT3B	156.605	0.239195	0.176329	1.35653	0.174931	0.995568
PDRG1	809.427	0.0799104	0.137187	0.582491	0.560236	0.995568
EPB41L1	1346.54	-0.115143	0.15377	-0.748805	0.453974	0.995568
DOCK9	511.321	-0.343274	0.280892	-1.22209	0.221675	0.995568
ANKRD10	195.033	0.475663	0.32818	1.44939	0.147227	0.995568
TGDS	96.8641	-0.152661	0.400946	-0.380751	0.703388	0.995568
DOCK3	94.5117	-0.167572	0.275873	-0.607424	0.543569	0.995568
C3orf18	425.086	0.251484	0.259355	0.969649	0.332221	0.995568
COQ9	1997.04	0.114825	0.166036	0.691568	0.489209	0.995568
TMEM40	13.2919	1.73859	0.914749	1.90062	0.0573518	0.995568
KIF9	257.517	0.14117	0.174327	0.809802	0.418054	0.995568
ARHGAP28	143.659	-0.516445	0.372397	-1.38681	0.165499	0.995568
CRLS1	535.347	-0.153481	0.140261	-1.09425	0.273845	0.995568
ATRN	2080.71	-0.154113	0.102965	-1.49675	0.134459	0.995568
SMOX	169.219	-0.0619758	0.217147	-0.285409	0.775331	0.995568
SIGLEC1	2.10123	0.767579	1.58379	0.484647	0.627927	0.995568
FKBP1A	4666.58	0.0779687	0.161224	0.483605	0.628666	0.995568
NSFL1C	2318.15	0.194664	0.223888	0.869474	0.384588	0.995568
SLC4A11	140.872	0.161391	0.204814	0.78799	0.430702	0.995568
C20orf194	142.668	-0.177395	0.237389	-0.747275	0.454898	0.995568
ZNF343	112.107	0.448499	0.4426	1.01333	0.310904	0.995568
EBF4	12.2118	0.192426	0.751751	0.25597	0.797974	0.995568
MAVS	4240.1	-0.0778576	0.130429	-0.596936	0.55055	0.995568
LZTS3	273.346	0.1883	0.166968	1.12776	0.259421	0.995568
XRN2	2764.9	-0.168972	0.161015	-1.04942	0.293985	0.995568
KIZ	223.672	0.065197	0.236858	0.275258	0.783118	0.995568
DYNLL1	3902.73	0.237252	0.213702	1.1102	0.266911	0.995568
TESC	147.027	0.335802	0.311039	1.07961	0.280314	0.995568
MAPKAPK5	716.072	0.151012	0.127795	1.18167	0.237337	0.995568
P2RX7	33.8198	-0.229745	0.371781	-0.617959	0.536602	0.995568
ESF1	82.1521	0.372584	0.518289	0.718874	0.472219	0.995568
RBBP9	918.876	-0.219716	0.22399	-0.980921	0.326632	0.995568
ANAPC5	5153.19	0.0835024	0.121374	0.687979	0.491466	0.995568
SLC23A2	389.536	-0.304906	0.235656	-1.29386	0.195713	0.995568
SLC8B1	485.756	0.327582	0.194682	1.68265	0.0924424	0.995568
TMEM230	3274.14	0.0652817	0.121208	0.53859	0.59017	0.995568
DZANK1	40.5001	0.40741	0.306283	1.33017	0.183461	0.995568
KDM2B	829.884	-0.397032	0.253533	-1.566	0.117349	0.995568
CFAP61	10.5094	0.835974	0.667335	1.25271	0.210313	0.995568
TASP1	186.214	-0.265682	0.307689	-0.863476	0.387876	0.995568
OAS1	20.3208	0.958961	0.487834	1.96575	0.0493272	0.995568
GCN1	6484.04	0.0936995	0.192077	0.487822	0.625676	0.995568
RPLP0	111395	0.244801	0.242402	1.0099	0.312545	0.995568
SIRT4	15.6793	-0.222899	0.452085	-0.493047	0.621979	0.995568
KIF16B	62.2789	-0.295773	0.474078	-0.623891	0.532699	0.995568
TRMT6	319.827	-0.298277	0.212	-1.40696	0.159438	0.995568
PEBP1	11321	0.0461357	0.123587	0.373305	0.708921	0.995568
BRAP	485.271	-0.214597	0.1567	-1.36948	0.17085	0.995568
ERP29	3664.18	0.126343	0.182	0.694192	0.487562	0.995568
IGBP1	1971.84	0.201954	0.21348	0.946007	0.344145	0.995568
ZNF302	222.331	0.126489	0.549476	0.2302	0.817937	0.995568
GRAMD1A	2170.81	0.230097	0.209485	1.0984	0.272031	0.995568
FXYD3	662.855	0.238632	0.209407	1.13956	0.254469	0.995568
HEPH	7.11136	-1.22386	0.825758	-1.4821	0.138313	0.995568
CDIP1	834.549	0.17205	0.366675	0.469216	0.638916	0.995568
CMTM1	6.25517	-1.22057	0.878832	-1.38885	0.164878	0.995568
GANAB	15339.6	0.135343	0.197534	0.685162	0.493241	0.995568
GMIP	580.736	0.251618	0.207931	1.2101	0.226239	0.995568
RBM41	100.167	0.322389	0.358761	0.898618	0.368856	0.995568
BIRC5	2215.59	0.0788281	0.212457	0.37103	0.710615	0.995568
LAG3	7.29677	0.449027	0.79691	0.56346	0.573121	0.995568
MLF2	9074.04	0.22321	0.199882	1.11671	0.264118	0.995568
OTUB2	245.875	0.283587	0.213331	1.32933	0.183739	0.995568
ZBTB25	183.023	0.0564279	0.224175	0.251713	0.801263	0.995568
NECAP1	2214.31	-0.190771	0.138947	-1.37297	0.169761	0.995568
ANKRD24	116.882	0.162598	0.259374	0.626885	0.530735	0.995568
DHX32	68.3085	0.106494	0.251805	0.422921	0.672353	0.995568
RCOR1	1449.44	-0.251455	0.212672	-1.18236	0.237061	0.995568
GPATCH2L	164.407	-0.50431	0.33483	-1.50617	0.132024	0.995568
LTBP4	607.675	0.184256	0.187362	0.983419	0.325401	0.995568
SLC9A1	1642.72	0.346073	0.211809	1.63389	0.102282	0.995568
SPTLC1	1048.53	-0.0480821	0.181794	-0.264487	0.791405	0.995568
PAPOLA	2956.69	-0.120475	0.214479	-0.561713	0.574312	0.995568
PCBP4	648.012	0.314886	0.207644	1.51647	0.129401	0.995568
YPEL3	258.175	0.225129	0.245934	0.915405	0.359979	0.995568
MRPS33	1190.66	0.142764	0.0966779	1.47669	0.139757	0.995568
NDUFB2	1701.6	0.201285	0.151204	1.33121	0.183119	0.995568
NUDC	3670.16	0.0685117	0.189839	0.360894	0.718179	0.995568
MAEA	1775.18	-0.0591784	0.159224	-0.371669	0.710139	0.995568
STRN4	1421.05	0.192169	0.191743	1.00222	0.316237	0.995568
SI	54.8689	0.554218	0.744931	0.743985	0.456885	0.995568
MUL1	756.361	0.176006	0.204785	0.859469	0.390082	0.995568
TFAP4	541.162	0.0856471	0.25768	0.332378	0.739604	0.995568
PDCD7	530.387	-0.18525	0.160068	-1.15732	0.24714	0.995568
SPG21	2792.35	0.124621	0.178579	0.697845	0.485274	0.995568
DNAJB11	1456.57	-0.150335	0.161532	-0.930686	0.352016	0.995568
THPO	4.3134	1.24325	0.958048	1.29769	0.194395	0.995568
CHRD	12.6245	1.30595	0.598808	2.18092	0.0291893	0.995568
FLT3LG	3.18683	-1.29903	1.17752	-1.10319	0.269943	0.995568
RAB11FIP3	768.517	0.112852	0.136562	0.82638	0.408588	0.995568
GNPTG	670.324	0.166741	0.145257	1.1479	0.251009	0.995568
ZNF268	201.44	0.20941	0.389372	0.537816	0.590704	0.995568
GOLGA3	2085.73	-0.173735	0.14501	-1.19809	0.230883	0.995568
PABPC4	3892.11	0.115074	0.143273	0.803182	0.421869	0.995568
CERS4	2444.66	0.237819	0.238922	0.995381	0.319551	0.995568
MCOLN1	361.642	0.248659	0.187695	1.3248	0.185236	0.995568
USP48	204.979	-0.12279	0.347556	-0.353295	0.723867	0.995568
EFNB1	287.539	-0.167015	0.160105	-1.04316	0.296876	0.995568
GLG1	579.774	0.206922	0.18693	1.10695	0.268315	0.995568
KIF4A	957.992	-0.146722	0.207307	-0.707755	0.479097	0.995568
TNRC6A	950.404	-0.168342	0.348261	-0.483377	0.628828	0.995568
PLEKHG2	150.156	0.136726	0.407636	0.335413	0.737314	0.995568
DLL3	74.4557	-0.151684	0.281099	-0.539609	0.589467	0.995568
NAT14	510.373	0.122663	0.194283	0.631361	0.527805	0.995568
PITPNM2	230.278	0.119486	0.155959	0.766133	0.443597	0.995568
EXOC1	456.299	-0.130962	0.326915	-0.4006	0.688715	0.995568
RBM27	376.551	-0.259451	0.438803	-0.59127	0.554339	0.995568
OSBPL8	745.993	-0.239735	0.519541	-0.461436	0.644486	0.995568
DTX2	365.123	0.360316	0.232921	1.54694	0.121877	0.995568
PUS7	316.315	-0.161353	0.335254	-0.481285	0.630314	0.995568
NRCAM	3.37286	-0.511219	1.25714	-0.406651	0.684264	0.995568
LAMB1	82.8317	-0.865823	0.367115	-2.35845	0.0183514	0.995568
DLD	2300.59	-0.220187	0.284122	-0.774975	0.438355	0.995568
WDR7	960.898	-0.185877	0.224101	-0.829435	0.406858	0.995568
TXNL1	2172.82	-0.0653874	0.129494	-0.504946	0.613597	0.995568
CMTM6	1367.34	-0.186937	0.386009	-0.484282	0.628185	0.995568
ITGA6	718.981	-0.178751	0.245365	-0.728508	0.466303	0.995568
RAPGEF4	21.3941	0.209347	0.7141	0.293162	0.769398	0.995568
MAP3K20	338.398	-0.249915	0.27801	-0.898944	0.368683	0.995568
FH	2.33716	1.76058	2.06037	0.854498	0.392829	0.995568
SEL1L3	3040.58	-0.0701483	0.0802162	-0.874491	0.381851	0.995568
TF	11.1523	-1.20263	1.00495	-1.1967	0.231422	0.995568
CDV3	1665.43	-0.268964	0.189647	-1.41823	0.156122	0.995568
MYO15A	3.71906	-1.27755	1.68774	-0.756959	0.449074	0.995568
ALKBH5	3424.39	-0.105255	0.115171	-0.913901	0.360769	0.995568
PITPNM3	59.9913	0.197749	0.314071	0.629631	0.528936	0.995568
SPAG7	985.195	-0.0349516	0.0912083	-0.383206	0.701567	0.995568
ORC6	270.315	-0.0722772	0.218921	-0.330153	0.741285	0.995568
ZFHX4	5.91323	1.07401	1.96706	0.545999	0.585066	0.995568
ZC3HC1	48.5958	-0.290444	0.556261	-0.522136	0.601576	0.995568
RGS17	31.858	0.709361	0.452011	1.56935	0.116568	0.995568
ANGPT2	14.0945	-1.24288	0.700733	-1.77368	0.0761162	0.995568
TMEM101	493.819	0.179066	0.195996	0.913624	0.360914	0.995568
CD200	2.71271	-1.16779	1.39246	-0.83865	0.401666	0.995568
CCDC80	22.2087	-0.314927	0.722748	-0.435736	0.663028	0.995568
PSME1	2889.32	0.348669	0.220812	1.57903	0.114328	0.995568
PPP2R3C	348.282	0.0503976	0.193426	0.260552	0.794438	0.995568
HAUS4	1138.93	0.184525	0.205189	0.89929	0.368498	0.995568
SLC7A8	2217.13	0.127277	0.210118	0.605739	0.544688	0.995568
SLC22A17	531.807	0.0558335	0.203787	0.27398	0.7841	0.995568
RNF31	1076.45	0.270318	0.1556	1.73726	0.0823416	0.995568
SCFD1	460.314	0.233361	0.409743	0.569532	0.568995	0.995568
G2E3	349.49	-0.148325	0.484881	-0.305899	0.759681	0.995568
HNRNPC	10815.7	-0.0561515	0.087655	-0.640596	0.521785	0.995568
SUPT16H	2445.96	-0.260564	0.287396	-0.906636	0.364599	0.995568
GEMIN2	132.249	0.15525	0.485142	0.320009	0.748962	0.995568
TGM1	30.0575	0.137656	0.542057	0.25395	0.799534	0.995568
TINF2	1415.43	0.136039	0.179452	0.758081	0.448403	0.995568
TBL1Y	21.5676	0.807421	1.44749	0.557809	0.576975	0.995568
SEMA6A	178.7	0.173179	0.27043	0.640383	0.521924	0.995568
TRPM7	653.043	-0.222575	0.463229	-0.480487	0.630881	0.995568
TYRO3	561.392	0.22596	0.233271	0.96866	0.332715	0.995568
WDR76	160.297	-0.287132	0.190541	-1.50692	0.13183	0.995568
SNAP23	843.601	-0.175172	0.234065	-0.748389	0.454225	0.995568
PHGDH	13965.9	0.54039	0.36638	1.47495	0.140227	0.995568
COL9A3	38.0534	0.308622	0.31814	0.970084	0.332005	0.995568
EZR	2192.76	-0.229555	0.099468	-2.30783	0.0210085	0.995568
MYL6	10714.9	0.147658	0.187428	0.787814	0.430805	0.995568
CLSPN	160.97	-0.623136	0.427079	-1.45907	0.144547	0.995568
RFFL	252.823	-0.288653	0.328221	-0.879448	0.379159	0.995568
MFSD11	737.667	-0.0318685	0.116985	-0.272416	0.785302	0.995568
DPYSL2	463.849	0.0471714	0.211232	0.223316	0.823289	0.995568
GPATCH2	317.258	-0.104203	0.359813	-0.289604	0.772119	0.995568
CDC45	20.2173	1.19485	0.682236	1.75138	0.0798805	0.995568
COMT	3833.12	0.240073	0.184792	1.29915	0.193892	0.995568
ECHDC1	16.8797	-0.495238	0.622795	-0.795186	0.426505	0.995568
XYLB	66.4277	-0.176525	0.311623	-0.566468	0.571075	0.995568
HDAC6	1193.85	0.114543	0.161673	0.708485	0.478644	0.995568
CDC6	900.13	-0.179264	0.205126	-0.87392	0.382162	0.995568
UPRT	368.119	-0.0589989	0.19278	-0.306043	0.759572	0.995568
CDC23	1189.27	-0.145067	0.140677	-1.03121	0.302443	0.995568
AAAS	1667.42	0.292134	0.252235	1.15818	0.246789	0.995568
CBX5	2927.49	-0.086093	0.175702	-0.489994	0.624138	0.995568
SUCO	956.015	-0.162691	0.497897	-0.326758	0.743851	0.995568
MSH2	224.292	0.0535524	0.207329	0.258297	0.796178	0.995568
MAP3K1	245.402	-0.174372	0.34753	-0.501746	0.615847	0.995568
DHPS	1722.73	0.234491	0.251289	0.933152	0.350742	0.995568
HOOK2	1102.62	0.106995	0.168172	0.636221	0.524632	0.995568
ARCN1	4730.52	-0.239772	0.140596	-1.7054	0.0881202	0.995568
EPB41L4B	1971.27	-0.198348	0.25379	-0.781546	0.434482	0.995568
TMEM38B	690.183	0.196786	0.275511	0.714257	0.475068	0.995568
PSMD5	445.932	-0.312867	0.153953	-2.03222	0.0421311	0.995568
NUP188	3392.17	0.0510445	0.176034	0.28997	0.771839	0.995568
CRAT	3032.54	0.282281	0.262247	1.07639	0.281752	0.995568
SH2D3C	6.00361	-0.477141	1.06534	-0.447877	0.654242	0.995568
NANS	2236.03	0.0408204	0.182358	0.223847	0.822876	0.995568
TBC1D2	155.789	0.206262	0.227805	0.905429	0.365238	0.995568
WHRN	220.021	-0.102793	0.193179	-0.53211	0.59465	0.995568
CWF19L1	372.271	-0.202766	0.179196	-1.13153	0.257833	0.995568
SEMA4G	74.354	-0.203982	0.443306	-0.460139	0.645417	0.995568
BTAF1	910.438	-0.325299	0.379378	-0.857452	0.391195	0.995568
IKZF5	9.17814	0.195911	0.792092	0.247334	0.804649	0.995568
BLNK	87.6805	0.345682	0.289333	1.19475	0.232183	0.995568
TLL2	83.6841	-0.152355	0.256076	-0.594959	0.551871	0.995568
TDRD1	6.83902	-0.373932	0.931972	-0.401226	0.688254	0.995568
SORBS1	146.082	-0.108385	0.206315	-0.525339	0.599348	0.995568
IL11	16.1479	-0.467097	0.52188	-0.895027	0.370773	0.995568
WAC	947.123	-0.0991943	0.343184	-0.289041	0.77255	0.995568
CREM	279.103	0.0425818	0.127174	0.334831	0.737753	0.995568
NUBP2	1655.52	0.328608	0.289602	1.13469	0.256506	0.995568
HIVEP1	564.633	-0.399522	0.320569	-1.24629	0.212659	0.995568
FKBP5	49.5635	-0.984202	0.868895	-1.13271	0.257338	0.995568
SRPK1	1185.68	-0.294058	0.256167	-1.14791	0.251004	0.995568
BRPF3	1356.56	-0.167502	0.135197	-1.23895	0.215363	0.995568
MRPS18A	1180.78	0.117741	0.23075	0.510255	0.609872	0.995568
PGC	16.2307	0.207959	0.481221	0.432148	0.665634	0.995568
TMEM14A	597.192	0.121878	0.149199	0.816881	0.413996	0.995568
HSP90AB1	58981.9	-0.0683557	0.163193	-0.418863	0.675316	0.995568
CDC5L	798.597	-0.239692	0.377085	-0.635646	0.525007	0.995568
ITPR3	1254.62	0.195733	0.192366	1.0175	0.308914	0.995568
ZNF184	143.522	-0.142181	0.417181	-0.340813	0.733244	0.995568
DSP	4456.61	-0.358475	0.179996	-1.99157	0.0464184	0.995568
SIRT1	502.395	-0.11245	0.348445	-0.322721	0.746907	0.995568
HNRNPH3	1147.8	-0.294682	0.217083	-1.35746	0.174635	0.995568
JAK2	10.8065	0.735789	1.31272	0.560505	0.575135	0.995568
ABL1	2011.53	-0.0316889	0.105874	-0.299306	0.764706	0.995568
ACOT7	1350.24	0.227472	0.26565	0.856283	0.391841	0.995568
CDC7	272.084	-0.230947	0.372017	-0.620798	0.534732	0.995568
SYDE2	11.8696	0.296925	0.849671	0.349458	0.726745	0.995568
PCSK5	5.60081	-1.55622	0.868186	-1.79249	0.0730541	0.995568
SCD	16819.9	-0.0841942	0.130575	-0.644797	0.519059	0.995568
TMED1	1401.47	0.210287	0.24892	0.844798	0.398224	0.995568
ABLIM1	1650.64	-0.147592	0.159132	-0.927486	0.353674	0.995568
ERMP1	989.739	-0.218784	0.138213	-1.58295	0.113433	0.995568
RAB18	288.504	-0.142215	0.278107	-0.511368	0.609094	0.995568
NRP1	6225.79	-0.0992998	0.127033	-0.781684	0.434401	0.995568
HSD17B7P2	30.979	0.225582	0.457546	0.493026	0.621994	0.995568
PALMD	145.23	0.131817	0.25753	0.51185	0.608756	0.995568
TSPAN15	626.82	0.350393	0.197147	1.77731	0.0755166	0.995568
WASHC2A	1611.65	-0.208582	0.147633	-1.41284	0.157703	0.995568
MAST3	668.712	0.172708	0.166024	1.04026	0.29822	0.995568
OCEL1	446.379	0.31044	0.267096	1.16228	0.245123	0.995568
MYO9B	1235.4	-0.0568301	0.2142	-0.265312	0.790769	0.995568
KCNK6	9.08869	0.614457	1.0772	0.57042	0.568393	0.995568
PSMD8	6649.77	0.160016	0.208031	0.769194	0.441778	0.995568
FBXL19	167.69	0.337875	0.27394	1.23339	0.217429	0.995568
HSD3B7	952.337	0.325637	0.250764	1.29858	0.194088	0.995568
SETD1A	840.862	0.0530663	0.204228	0.259838	0.794989	0.995568
BCL7C	814.193	0.194807	0.204461	0.952783	0.3407	0.995568
EFNA2	7.51961	0.576197	0.65518	0.879448	0.379158	0.995568
CIRBP	6003.1	0.193986	0.133014	1.45839	0.144733	0.995568
ATP5F1D	4486.39	0.464995	0.283736	1.63883	0.101248	0.995568
HNRNPM	7408.48	-0.16789	0.0750731	-2.23635	0.0253286	0.995568
MARCHF2	771.766	0.269039	0.240179	1.12016	0.262647	0.995568
NDUFB7	1690.26	0.41949	0.288158	1.45576	0.145458	0.995568
TECR	3549.23	0.419867	0.284655	1.475	0.140212	0.995568
TIMM13	2817.53	0.241933	0.202899	1.19238	0.23311	0.995568
CDC34	1198.99	0.273767	0.241073	1.13562	0.256117	0.995568
MTAP	794.182	-0.288436	0.175508	-1.64344	0.100293	0.995568
CEP170B	1798.6	0.0545517	0.134337	0.406081	0.684683	0.995568
POLR2E	5570.44	0.348275	0.267879	1.30012	0.193561	0.995568
POLRMT	1643.02	0.0956637	0.215982	0.442924	0.65782	0.995568
HCN2	92.7366	0.324782	0.335097	0.969217	0.332437	0.995568
IZUMO4	25.9213	-0.136933	0.500246	-0.273732	0.784291	0.995568
RASSF7	560.183	0.244799	0.190204	1.28704	0.198082	0.995568
GADD45B	71.3298	-0.125177	0.302703	-0.413532	0.679217	0.995568
PALM	60.0544	-0.101357	0.390613	-0.259482	0.795264	0.995568
MADCAM1	20.9362	0.868371	0.472075	1.83948	0.0658452	0.995568
MKNK2	6992.04	0.0974974	0.148337	0.657267	0.511009	0.995568
ARVCF	1043.43	0.0786247	0.125791	0.62504	0.531945	0.995568
TRMT2A	630.025	0.461711	0.226025	2.04274	0.041078	0.995568
KLHL22	570.105	0.0838289	0.221534	0.378402	0.705132	0.995568
MED15	929.101	0.0902858	0.16648	0.542321	0.587597	0.995568
SERPIND1	12.4199	0.39816	0.568164	0.700784	0.483438	0.995568
SNAP29	1189.51	-0.0421494	0.130122	-0.323922	0.745997	0.995568
LZTR1	811.129	0.117355	0.151549	0.774373	0.43871	0.995568
MMP11	89.953	-0.858443	0.549304	-1.56278	0.118104	0.995568
BCL2L13	1344.79	0.0946438	0.132915	0.712065	0.476425	0.995568
DDT	87.3918	0.978451	1.63879	0.597057	0.55047	0.995568
GSTT2	9.71645	-1.76216	1.08891	-1.61828	0.105603	0.995568
CABIN1	1820.49	-0.0498569	0.201471	-0.247464	0.804549	0.995568
TBC1D10A	30.4854	-0.441572	0.464391	-0.950862	0.341675	0.995568
SUSD2	55.4821	0.205584	0.444846	0.462147	0.643976	0.995568
SF3A1	5068.89	0.272779	0.258675	1.05453	0.291642	0.995568
RNF215	138.802	0.510778	0.422858	1.20792	0.227079	0.995568
SEC14L2	238.186	0.282167	0.348206	0.810345	0.417742	0.995568
SPECC1L	2813.3	-0.40934	0.176691	-2.3167	0.0205201	0.995568
PPIL2	1338.47	0.0972954	0.137793	0.7061	0.480126	0.995568
YPEL1	118.794	0.076273	0.338325	0.225443	0.821634	0.995568
SNRPD3	2211.68	-0.165951	0.169833	-0.977141	0.328499	0.995568
PES1	2582.57	0.105194	0.222022	0.4738	0.635642	0.995568
GGT1	135.132	0.428176	0.277119	1.5451	0.122322	0.995568
PRODH	5.34288	0.268395	1.14805	0.233783	0.815153	0.995568
PPM1F	660.597	0.0631676	0.161877	0.390219	0.696375	0.995568
TOP3B	92.6074	0.276787	0.49864	0.555084	0.578837	0.995568
ESS2	493.228	0.290517	0.228679	1.27042	0.203936	0.995568
CRYBB2P1	132.017	0.090223	0.248219	0.363482	0.716245	0.995568
CARD10	120.761	0.159532	0.197137	0.809244	0.418375	0.995568
LRP5L	49.3844	0.69429	0.364498	1.90478	0.0568082	0.995568
SLC25A1	3315.55	0.25918	0.260796	0.993803	0.320319	0.995568
GRK3	324.26	-0.210989	0.245628	-0.858975	0.390354	0.995568
GGA1	1065.2	0.126266	0.192666	0.655362	0.512234	0.995568
HIRA	1182.48	-0.0503277	0.118088	-0.426189	0.66997	0.995568
SH3BP1	33.9836	-0.18767	0.627989	-0.298843	0.76506	0.995568
LGALS1	13.279	0.154625	0.663584	0.233015	0.815749	0.995568
PIK3IP1	17.6261	0.2531	0.821453	0.308113	0.757997	0.995568
SRRD	644.048	0.155161	0.26718	0.580736	0.561419	0.995568
PATZ1	1852.47	0.19007	0.173054	1.09832	0.272063	0.995568
TRIOBP	744.818	0.133336	0.148909	0.895421	0.370562	0.995568
TFIP11	752.432	-0.0369252	0.153135	-0.241128	0.809456	0.995568
GCAT	236.696	0.456991	0.361601	1.2638	0.206303	0.995568
ANKRD54	772.982	0.239481	0.176101	1.3599	0.17386	0.995568
EIF3L	10002.1	0.121133	0.178593	0.678263	0.497605	0.995568
SNU13	2637.44	0.189398	0.229872	0.82393	0.40998	0.995568
MICALL1	1041.25	0.191879	0.224892	0.853204	0.393546	0.995568
POLR2F	899.337	0.0955741	0.206304	0.463268	0.643173	0.995568
CCDC134	75.3756	0.276382	0.227681	1.2139	0.224786	0.995568
DEPDC5	286.434	0.0581287	0.168284	0.345419	0.729779	0.995568
PICK1	911.457	0.108604	0.207145	0.524289	0.600078	0.995568
TTC28	212.755	0.251313	0.222129	1.13138	0.257893	0.995568
SLC16A8	1.9156	2.87853	1.70605	1.68725	0.0915548	0.995568
CENPM	398.076	0.42342	0.284668	1.48741	0.136906	0.995568
SEPTIN3	1390.93	0.0501845	0.157565	0.3185	0.750106	0.995568
DDX17	4687.12	-0.320877	0.278077	-1.15392	0.248535	0.995568
DMC1	3.11373	5.40849	2.5296	2.13809	0.0325097	0.995568
TCF20	475.533	-0.10912	0.211158	-0.516769	0.605317	0.995568
CBY1	818.777	0.158845	0.184106	0.862791	0.388253	0.995568
XBP1	4941.48	0.290351	0.183278	1.58421	0.113147	0.995568
RTCB	2204.47	-0.0525649	0.129831	-0.404872	0.685572	0.995568
JOSD1	1626.23	-0.112389	0.131041	-0.857666	0.391077	0.995568
POLDIP3	3930.68	0.150564	0.203711	0.739109	0.459841	0.995568
PPP6R2	1418.02	0.048916	0.13439	0.363984	0.71587	0.995568
SBF1	2770.38	0.2285	0.171209	1.33463	0.181998	0.995568
SUN2	2152.92	-0.0526715	0.134639	-0.391206	0.695645	0.995568
CYB5R3	3340.73	0.285285	0.254366	1.12155	0.262054	0.995568
DNAL4	774.899	0.0637979	0.194469	0.328062	0.742865	0.995568
LMF2	1190.1	0.238768	0.222096	1.07507	0.282345	0.995568
RHBDD3	770.874	0.0732126	0.152698	0.479461	0.631611	0.995568
PACSIN2	2697.03	-0.12784	0.0822604	-1.55409	0.120162	0.995568
TTLL1	393.889	0.326945	0.19345	1.69008	0.0910134	0.995568
AP1B1	4711.89	0.180766	0.208631	0.866443	0.386247	0.995568
HMGXB4	592.389	-0.0809646	0.228939	-0.353651	0.723601	0.995568
TOM1	940.262	0.363954	0.22618	1.60914	0.107587	0.995568
CHKB	110.915	0.218768	0.351065	0.623154	0.533183	0.995568
BIK	143.258	0.196747	0.249905	0.787287	0.431114	0.995568
HMOX1	121.741	0.193173	0.274088	0.704786	0.480944	0.995568
THOC5	1091.56	0.0456217	0.197534	0.230956	0.817349	0.995568
MCM5	1413.26	0.191493	0.280759	0.682053	0.495205	0.995568
APOBEC3H	19.1519	0.231631	0.528576	0.438218	0.661229	0.995568
ARSA	394.493	0.254029	0.300128	0.846403	0.397328	0.995568
TSPO	1773.94	0.342754	0.260093	1.31782	0.187565	0.995568
RASD2	11.5467	-0.284708	0.580593	-0.490375	0.623869	0.995568
CBX7	425.43	0.0926543	0.165366	0.560297	0.575277	0.995568
PDGFB	35.0365	0.599903	0.463354	1.2947	0.195424	0.995568
CABP7	6.01259	1.11833	0.804139	1.39072	0.16431	0.995568
RPL3	89305	0.0909921	0.150319	0.605325	0.544963	0.995568
ZMAT5	7.23588	0.310977	0.647722	0.48011	0.63115	0.995568
SYNGR1	398.052	0.316937	0.316311	1.00198	0.316354	0.995568
TAB1	1097.8	0.203107	0.189231	1.07333	0.283123	0.995568
ASCC2	1544.13	0.118521	0.175791	0.674217	0.500174	0.995568
MIEF1	1781.86	-0.0563095	0.130824	-0.430421	0.666889	0.995568
APOL1	3.78269	1.67111	1.43192	1.16704	0.243196	0.995568
PNPLA3	2.25146	1.67273	2.61005	0.640881	0.5216	0.995568
MYH9	1.99966	-1.71171	1.64868	-1.03823	0.299163	0.995568
CACNA1I	2.61347	0.572674	1.54903	0.369699	0.711607	0.995568
SAMM50	1711.32	0.0698491	0.180476	0.387027	0.698736	0.995568
TXN2	3098.82	0.238935	0.207343	1.15237	0.249171	0.995568
FOXRED2	3198.77	0.249866	0.260222	0.960206	0.336952	0.995568
EIF3D	5567.34	0.189459	0.218882	0.865577	0.386722	0.995568
TNRC6B	1069.97	-0.263538	0.261274	-1.00866	0.313135	0.995568
SGSM3	1368.17	0.314917	0.209325	1.50444	0.132469	0.995568
IFT27	826.061	0.193563	0.230114	0.84116	0.400258	0.995568
KIAA0930	2482.74	0.184002	0.199745	0.921187	0.356953	0.995568
SLC25A17	1295.63	-0.0722257	0.108897	-0.663246	0.507173	0.995568
UPK3A	190.418	0.403443	0.342545	1.17778	0.238885	0.995568
FAM118A	246.454	-0.125005	0.387626	-0.322488	0.747083	0.995568
KCTD17	297.976	0.165741	0.24413	0.678903	0.497199	0.995568
ST13	8414.53	-0.184002	0.0795303	-2.3136	0.0206894	0.995568
RBX1	14.8461	-1.57178	0.925925	-1.69752	0.0895975	0.995568
EP300	1796.32	-0.145033	0.120081	-1.20779	0.227128	0.995568
L3MBTL2	1575.63	0.207808	0.266985	0.778351	0.436362	0.995568
CHADL	6.63008	0.753014	0.839001	0.897513	0.369445	0.995568
RANGAP1	275.459	-0.0936677	0.226078	-0.414316	0.678643	0.995568
ZC3H7B	2066.71	-0.0471325	0.0862399	-0.546528	0.584703	0.995568
PHF5A	538.186	0.0559543	0.128417	0.435723	0.663037	0.995568
ACO2	4396.76	0.231727	0.238921	0.96989	0.332101	0.995568
POLR3H	2230.04	0.0699111	0.213711	0.327129	0.74357	0.995568
TRMU	736.265	-0.0804622	0.0874876	-0.919698	0.35773	0.995568
PMM1	591.325	0.324429	0.211236	1.53586	0.124573	0.995568
DESI1	1514.72	0.298781	0.191534	1.55994	0.118775	0.995568
BRD1	663.951	-0.185476	0.0926352	-2.00222	0.0452611	0.995568
ZBED4	1175.9	-0.175903	0.150221	-1.17096	0.241614	0.995568
HDAC10	485.045	0.349208	0.21721	1.6077	0.107901	0.995568
ABHD4	2384.79	0.247309	0.152881	1.61766	0.105736	0.995568
KHNYN	1383.35	-0.0875212	0.129651	-0.675053	0.499642	0.995568
SDR39U1	1490.25	0.186194	0.2014	0.924501	0.355226	0.995568
RBM23	2921.07	0.0465619	0.121543	0.383088	0.701654	0.995568
PRMT5	4407.71	0.0995352	0.184874	0.538395	0.590304	0.995568
POLE2	63.9534	-0.323795	0.480131	-0.674389	0.500064	0.995568
VCPKMT	50.5766	-0.246277	0.456128	-0.53993	0.589245	0.995568
SOS2	277.359	-0.143676	0.446181	-0.322012	0.747444	0.995568
NIN	707.68	-0.144389	0.286935	-0.503211	0.614816	0.995568
PYGL	129.49	0.121368	0.201704	0.601715	0.547364	0.995568
PSMC6	903.937	-0.167382	0.30313	-0.552178	0.580826	0.995568
GNPNAT1	1328.29	-0.231318	0.200374	-1.15443	0.248325	0.995568
DDHD1	159.409	-0.128698	0.531178	-0.242288	0.808557	0.995568
CDKN3	319.876	0.162017	0.279848	0.578948	0.562624	0.995568
CNIH1	2594.29	0.0597414	0.140788	0.424338	0.67132	0.995568
CGRRF1	204.535	-0.094912	0.368287	-0.257712	0.79663	0.995568
ATP6V1D	920.218	-0.146459	0.245136	-0.597462	0.550199	0.995568
PLEK2	8.99622	0.424044	0.771679	0.549509	0.582656	0.995568
PIGH	573.361	0.0480921	0.112811	0.426306	0.669885	0.995568
PSMA3	771.181	0.149842	0.254707	0.58829	0.556337	0.995568
VTI1B	2257.94	0.048563	0.0886401	0.547868	0.583783	0.995568
TIMM9	723.039	0.286737	0.130933	2.18996	0.0285274	0.995568
GSTZ1	1844.69	0.268857	0.22787	1.17987	0.238052	0.995568
KIAA0586	275.004	0.175278	0.393431	0.44551	0.655951	0.995568
TMED8	1104.06	-0.279383	0.310631	-0.899403	0.368438	0.995568
SAMD15	157.134	-0.308071	0.266796	-1.15471	0.248211	0.995568
AHSA1	3400.31	-0.135902	0.156121	-0.870492	0.384032	0.995568
DAAM1	471.318	0.256771	0.636553	0.403378	0.68667	0.995568
ISM2	101.317	0.145714	0.297755	0.489377	0.624575	0.995568
SPTLC2	21.7712	1.8832	2.82178	0.667379	0.50453	0.995568
LGMN	1972.19	0.0981952	0.150907	0.6507	0.51524	0.995568
ALKBH1	325.249	0.0860573	0.169421	0.507948	0.611489	0.995568
ITPK1	3289.39	0.204063	0.210907	0.967551	0.333269	0.995568
DHRS7	5997.82	-0.0440906	0.125671	-0.350841	0.725708	0.995568
PPM1A	1144.23	-0.278095	0.252735	-1.10034	0.271183	0.995568
GALNT16	7.23323	0.76268	0.847483	0.899935	0.368155	0.995568
ASB2	2.34474	0.841094	1.23928	0.678693	0.497332	0.995568
CEP128	87.2208	-0.0905431	0.371176	-0.243936	0.80728	0.995568
ERH	2498.26	0.0867217	0.0812405	1.06747	0.28576	0.995568
HIF1A	1670.96	-0.195709	0.352725	-0.554847	0.578999	0.995568
SUSD6	1375.72	0.0799651	0.131327	0.608902	0.542589	0.995568
SRSF5	999.157	-0.135842	0.219717	-0.618259	0.536405	0.995568
EIF5	4064.82	-0.0712466	0.252526	-0.282135	0.77784	0.995568
DICER1	149.306	0.130187	0.447648	0.290824	0.771186	0.995568
ZFYVE21	198.477	-0.40896	0.24609	-1.66183	0.0965467	0.995568
MTHFD1	3907.71	0.0507945	0.148118	0.342934	0.731648	0.995568
ZC3H14	1356.79	-0.0643978	0.197176	-0.3266	0.743971	0.995568
TELO2	899.277	0.154922	0.193225	0.80177	0.422686	0.995568
PCNX1	680.555	-0.327297	0.19096	-1.71396	0.0865367	0.995568
BDKRB1	2.69705	0.493387	1.14804	0.429765	0.667367	0.995568
GSKIP	301.096	0.281338	0.408469	0.688762	0.490973	0.995568
VRK1	342.936	-0.14166	0.314131	-0.450959	0.652019	0.995568
PSMC1	3016.59	-0.0417619	0.115828	-0.360552	0.718435	0.995568
RPS6KA5	270.643	-0.181609	0.303621	-0.598144	0.549744	0.995568
PPP4R3A	749.238	-0.249548	0.445626	-0.559994	0.575483	0.995568
C14orf93	163.708	0.163202	0.182866	0.892468	0.372142	0.995568
PSMB5	1649.04	0.130804	0.263855	0.495744	0.620075	0.995568
YY1	289.484	-0.166329	0.198582	-0.837582	0.402266	0.995568
ACIN1	3439.27	-0.0513091	0.118111	-0.434413	0.663988	0.995568
CCNB1IP1	808.928	0.063521	0.140824	0.451068	0.651941	0.995568
TRIP11	337.737	0.310698	0.317215	0.979457	0.327354	0.995568
APEX1	8029.71	0.0703895	0.167606	0.419971	0.674506	0.995568
PABPN1	1862.9	-0.0926243	0.0793109	-1.16786	0.242862	0.995568
ARHGAP5	694.244	-0.0992285	0.412822	-0.240366	0.810046	0.995568
CINP	1026.35	0.201719	0.185129	1.08961	0.275884	0.995568
DHRS2	3.17495	1.10313	1.36173	0.810094	0.417886	0.995568
SRP54	1633.19	-0.129007	0.142318	-0.90647	0.364687	0.995568
CHD8	1355.57	0.217776	0.24402	0.89245	0.372152	0.995568
PCK2	680.591	0.423362	0.223649	1.89297	0.0583614	0.995568
PRORP	321.543	0.103704	0.233605	0.443929	0.657094	0.995568
DCAF11	3145.96	0.29189	0.250566	1.16492	0.24405	0.995568
PSMA6	114.134	0.193458	0.392884	0.492404	0.622433	0.995568
NFKBIA	60.7964	-0.493482	0.317622	-1.55368	0.120261	0.995568
EMC9	696.771	0.260527	0.200412	1.29996	0.193615	0.995568
PSME2	1629.66	0.189322	0.164104	1.15367	0.248637	0.995568
BRMS1L	201.1	-0.157096	0.318147	-0.493785	0.621458	0.995568
REC8	9.32276	0.476201	0.659969	0.72155	0.470571	0.995568
TM9SF1	2628.35	0.100831	0.198001	0.509245	0.61058	0.995568
SEC23A	1972.22	-0.217277	0.309909	-0.701101	0.48324	0.995568
GMPR2	1269.14	0.0615917	0.13824	0.445541	0.655929	0.995568
PNN	1003.64	-0.305951	0.309959	-0.987069	0.323609	0.995568
RABGGTA	1053.98	0.269998	0.255587	1.05638	0.290792	0.995568
PCIF1	1222.54	0.207332	0.20275	1.0226	0.306498	0.995568
GSS	3845.9	0.194233	0.191485	1.01435	0.310416	0.995568
TRPC4AP	4251.08	0.134501	0.198152	0.678777	0.497279	0.995568
PYGB	6250.84	0.146743	0.220606	0.665184	0.505933	0.995568
ABHD12	1894.21	0.135315	0.168815	0.801558	0.422809	0.995568
PROCR	51.8797	0.171253	0.337498	0.507419	0.611861	0.995568
GINS1	703.225	-0.148716	0.189416	-0.785127	0.432379	0.995568
ZMYND8	1543.28	-0.330779	0.154859	-2.136	0.0326796	0.995568
SGK2	3.05705	1.21325	1.74395	0.695687	0.486625	0.995568
MYBL2	2412.9	0.437154	0.300494	1.45478	0.145729	0.995568
NDRG3	2584.36	0.0399527	0.142454	0.280461	0.779124	0.995568
RAB5IF	1656.94	0.0207605	0.0801413	0.259048	0.795598	0.995568
PABPC1L	94.728	0.178852	0.464219	0.385275	0.700034	0.995568
STK4	475.01	-0.270056	0.303926	-0.888558	0.374241	0.995568
SALL4	4.42351	-0.329221	1.34547	-0.244688	0.806698	0.995568
ADNP	3139.75	-0.174882	0.190677	-0.917167	0.359055	0.995568
PFDN4	298.16	0.199018	0.213165	0.933637	0.350491	0.995568
CSTF1	939.744	-0.0376448	0.115292	-0.326516	0.744034	0.995568
BMP7	5.93963	1.22138	0.931505	1.31118	0.189795	0.995568
TPD52L2	722.691	-0.105816	0.187097	-0.565568	0.571688	0.995568
DNAJC5	4808.19	0.126301	0.197717	0.6388	0.522953	0.995568
NELFCD	485.173	-0.43767	0.400085	-1.09394	0.27398	0.995568
CTSZ	1732.13	0.0302699	0.102562	0.295139	0.767888	0.995568
PRPF6	4405.27	0.187991	0.204495	0.919294	0.357942	0.995568
HRH3	2.03799	1.19397	1.25071	0.954637	0.339761	0.995568
MTG2	963.053	-0.0863406	0.173627	-0.497275	0.618995	0.995568
PSMA7	4235.38	0.131924	0.138104	0.955248	0.339453	0.995568
SLCO4A1	474.267	0.0789911	0.179279	0.440604	0.659499	0.995568
MRGBP	449.803	0.0564844	0.110261	0.51228	0.608455	0.995568
TCFL5	71.991	-0.315637	0.228922	-1.37879	0.167958	0.995568
DIDO1	734.263	-0.0758185	0.221955	-0.341594	0.732656	0.995568
GID8	2457.75	-0.0514395	0.0933955	-0.550771	0.581791	0.995568
ARFGAP1	1465.37	0.273041	0.214134	1.27509	0.202276	0.995568
CHRNA4	7.55849	-0.972748	1.00739	-0.965615	0.334237	0.995568
EEF1A2	36339.5	0.383278	0.315555	1.21461	0.224513	0.995568
PTK6	116.595	-0.132748	0.181508	-0.73136	0.464559	0.995568
C20orf27	970.95	0.317168	0.287296	1.10398	0.269602	0.995568
SPEF1	17.6874	0.899271	0.44697	2.01193	0.0442274	0.995568
CDC25B	1215.99	0.133802	0.212139	0.63073	0.528217	0.995568
RNF24	804.023	-0.0703037	0.133358	-0.527178	0.59807	0.995568
ARFRP1	599.132	0.0673737	0.191832	0.351213	0.725429	0.995568
NDUFAF5	222.644	-0.313208	0.175249	-1.78721	0.0739035	0.995568
TRIB3	1936.2	0.57583	0.239635	2.40294	0.0162637	0.995568
RASSF2	71.8793	-0.281454	0.334423	-0.841612	0.400005	0.995568
CSNK2A1	4142.33	-0.0791768	0.113051	-0.700365	0.4837	0.995568
SLC52A3	62.4352	0.231356	0.29126	0.794326	0.427005	0.995568
RPS10P5	21.7611	0.41192	0.492286	0.836749	0.402734	0.995568
RSPO4	5.62233	0.394379	0.738185	0.534255	0.593165	0.995568
CDS2	1259.85	-0.0680805	0.104274	-0.652897	0.513822	0.995568
HM13	5193.27	0.178299	0.239405	0.744759	0.456417	0.995568
SIRPB1	1.97352	-3.84621	2.04524	-1.88056	0.0600315	0.995568
SEC23B	5555.22	-0.0932809	0.169298	-0.550986	0.581643	0.995568
FERMT1	14.1401	-5.89602	3.91093	-1.50757	0.131663	0.995568
CCM2L	2.34085	-0.419652	1.75215	-0.239507	0.810712	0.995568
PLCB4	1310.97	-0.297225	0.380682	-0.78077	0.434938	0.995568
MYL9	25.2142	0.306822	0.50671	0.605519	0.544834	0.995568
TM9SF4	72.2971	1.9487	0.916873	2.12538	0.0335548	0.995568
POFUT1	2664.66	-0.0417155	0.105664	-0.394796	0.692994	0.995568
SAMHD1	889.491	-0.234379	0.219338	-1.06857	0.285262	0.995568
PAK5	2.95164	0.351978	1.20005	0.293304	0.76929	0.995568
KIF3B	3124.09	-0.267109	0.208559	-1.28073	0.200287	0.995568
MROH8	14.6011	-0.349378	0.683911	-0.510853	0.609454	0.995568
NOP56	4340.15	-0.0345595	0.130775	-0.264266	0.791575	0.995568
MANBAL	1246.69	0.160761	0.201704	0.797016	0.425442	0.995568
IDH3B	1812.34	0.198479	0.160987	1.23288	0.217619	0.995568
MAPRE1	3361.85	-0.151456	0.0905267	-1.67305	0.0943176	0.995568
JAG1	2213.12	-0.555258	0.241333	-2.30079	0.0214033	0.995568
CDK5RAP1	778.262	0.0644119	0.17468	0.368743	0.712319	0.995568
TTI1	602.435	-0.0300564	0.124759	-0.240916	0.80962	0.995568
E2F1	980.294	0.265752	0.262477	1.01248	0.31131	0.995568
RPRD1B	27.2788	-0.794036	0.79161	-1.00306	0.31583	0.995568
CST3	2991.75	0.338029	0.252175	1.34045	0.180098	0.995568
ASIP	3.33377	-0.345879	0.997555	-0.346726	0.728797	0.995568
ACTR5	351.377	0.110595	0.149046	0.742022	0.458074	0.995568
AHCY	13827.5	0.343179	0.279651	1.22717	0.21976	0.995568
FAM83D	983.104	-0.0951273	0.120224	-0.79125	0.428798	0.995568
DHX35	298.134	-0.11825	0.151841	-0.778772	0.436114	0.995568
DNTTIP1	605.031	0.117383	0.145172	0.808576	0.418759	0.995568
MAP1LC3A	62.9125	0.267351	0.28027	0.953903	0.340133	0.995568
TNNC2	3.02085	0.295113	1.0942	0.269707	0.787386	0.995568
ACOT8	659.356	0.255377	0.235183	1.08586	0.277539	0.995568
APMAP	4642.96	0.0609484	0.133241	0.457431	0.647361	0.995568
CELF4	3.27532	1.81269	1.10146	1.64572	0.0998213	0.995568
ZNF516	4.85739	-0.763249	1.83761	-0.415349	0.677887	0.995568
ADNP2	967.336	-0.258295	0.236956	-1.09005	0.27569	0.995568
RBFA	596.455	0.0715526	0.200852	0.356245	0.721657	0.995568
USP14	3246.45	-0.192153	0.140918	-1.36358	0.172699	0.995568
VAPA	1221.47	-0.14883	0.126639	-1.17523	0.239905	0.995568
METTL4	95.6839	0.21504	0.43262	0.497065	0.619144	0.995568
LPIN2	1580.61	-0.149119	0.18667	-0.798839	0.424384	0.995568
SMCHD1	251.495	-0.397451	0.622598	-0.638375	0.523229	0.995568
MYOM1	5.09138	1.62603	1.79686	0.904931	0.365502	0.995568
MYL12A	916.054	0.0918702	0.201051	0.456951	0.647707	0.995568
CEP76	16.7085	1.45992	0.942383	1.54918	0.121339	0.995568
ST8SIA5	3.54542	-1.13014	1.21854	-0.927458	0.353689	0.995568
CEP192	442.788	-0.200101	0.432008	-0.463188	0.64323	0.995568
RNMT	145.441	-0.3594	0.761842	-0.471752	0.637104	0.995568
SMAD7	204.682	0.386919	0.273013	1.41722	0.156419	0.995568
LIPG	3.21813	0.593599	1.29776	0.457401	0.647383	0.995568
LAMA1	42.479	-0.322593	0.40306	-0.800361	0.423502	0.995568
RNF125	80.5681	-0.216008	0.361215	-0.598005	0.549837	0.995568
ANKRD12	123.962	0.977515	0.45986	2.12568	0.03353	0.995568
POLI	276.317	0.176202	0.507374	0.347282	0.728379	0.995568
MIB1	578.33	-0.296566	0.408639	-0.725741	0.467998	0.995568
RIOK3	951.896	-0.199829	0.244911	-0.815924	0.414544	0.995568
CSTF2	31.0212	-0.597726	0.664279	-0.899813	0.36822	0.995568
PSMD10	1610.87	-0.229963	0.180907	-1.27117	0.203668	0.995568
ATG4A	388.838	-0.150785	0.298284	-0.505506	0.613204	0.995568
TBL1X	2574.32	-0.138396	0.130466	-1.06078	0.288788	0.995568
PGRMC1	1567.42	-0.138453	0.207718	-0.666544	0.505064	0.995568
MID1	89.5042	0.526059	0.547028	0.961668	0.336216	0.995568
NXT2	189.901	0.123828	0.383059	0.323261	0.746497	0.995568
MCTS2P	62.0005	0.107588	0.345118	0.311743	0.755236	0.995568
ALG13	327.757	-0.117175	0.18763	-0.624498	0.532301	0.995568
PRPS2	41.7073	0.342043	0.823393	0.415406	0.677845	0.995568
MOSPD1	181.9	-0.144175	0.422836	-0.340972	0.733125	0.995568
AMMECR1	829.85	-0.297332	0.319719	-0.929979	0.352382	0.995568
WDR13	1659.71	0.343275	0.234874	1.46153	0.14387	0.995568
SUV39H1	4.52672	-0.503812	1.89086	-0.266446	0.789896	0.995568
PAGE4	2.6383	-1.63093	2.13448	-0.764091	0.444813	0.995568
SRPX	12.6042	-0.504748	0.577188	-0.874495	0.381849	0.995568
[truncated: 13,866 more rows]

## Sheet: Counts
GeneName	ETOH_rep1	ETOH_rep2	ETOH_rep3	DHT_rep1	DHT_rep2	DHT_rep3	Enza_rep1	Enza_rep2	Enza_rep3	VPC220010_rep1	VPC220010_rep2	VPC220010_rep3
TSPAN6	3	18	16	3	18	22	4	5	8	10	20	4
DPM1	23	28	34	17	14	16	60	15	8	56	39	15
SCYL3	266	223	247	163	152	183	247	157	140	180	169	67
C1orf112	318	326	352	325	259	345	301	308	299	286	258	190
FUCA2	0	1	2	2	0	4	1	1	0	3	2	1
GCLC	498	388	445	399	363	450	522	321	311	383	400	90
NFYA	1176	973	1261	952	853	1057	1172	897	866	957	960	384
STPG1	225	236	216	250	265	237	212	230	221	253	249	201
NIPAL3	1701	1800	1694	1593	1683	1695	1620	1632	1547	1554	1466	1090
LAS1L	1504	1483	1539	1446	1427	1494	1232	1334	1465	1245	1359	1289
ENPP4	389	342	451	343	289	318	539	250	199	351	423	66
SEMA3F	489	538	408	464	503	406	368	485	437	442	411	606
ANKIB1	801	778	1019	554	647	762	889	702	554	714	811	133
CYP51A1	2517	2307	2453	2122	1838	2454	2405	1982	1990	1957	1955	649
KRIT1	132	203	136	139	123	171	311	119	67	120	190	26
RAD52	107	94	90	80	101	102	113	71	93	110	69	46
MYH16	0	3	0	2	1	1	1	0	1	2	0	1
BAD	128	167	137	106	184	155	83	164	154	129	159	242
LAP3	2092	2303	2144	1827	1741	2108	1959	1995	1813	1808	2001	1011
CD99	5849	6301	5257	6208	6783	6274	4872	6609	6464	5756	6002	9479
HS3ST1	156	184	147	279	290	255	190	185	138	197	165	164
AOC1	0	47	0	28	19	19	0	38	0	0	0	8
MAD1L1	546	669	566	458	637	613	396	634	652	547	547	836
LASP1	5306	5446	4482	4310	4244	3927	4073	4688	4425	4036	3956	4606
SNX11	75	127	106	111	95	143	123	136	128	115	138	156
M6PR	2367	2196	2298	2158	2018	2176	2202	2024	2044	2078	1979	1415
KLHL13	149	126	137	108	110	159	157	127	105	121	122	55
CYP26B1	4	3	2	1	1	1	2	2	2	0	5	1
ICA1	1345	1219	1306	1243	1222	1281	1296	1276	1272	1202	1234	1030
DBNDD1	74	67	52	42	61	77	76	52	59	64	65	90
ALS2	511	438	539	382	391	424	517	385	368	437	415	159
CASP10	26	9	21	20	16	23	24	7	22	13	19	12
CFLAR	689	569	530	688	589	561	741	552	531	568	569	387
TFPI	2174	2078	2525	2058	2143	2652	2889	2031	1657	2021	2398	1063
NDUFAF7	202	144	217	145	126	144	190	120	117	150	167	63
RBM5	389	366	447	285	255	295	550	307	178	278	440	54
MTMR7	8	4	16	1	0	0	13	4	3	2	3	1
SLC7A2	3	16	36	19	13	19	89	14	0	0	6	101
ARF5	3580	4055	3171	3794	4248	3639	3154	4165	3824	3532	3770	5378
SARM1	1439	1420	1315	1388	1442	1228	1141	1289	1321	1264	1310	1604
POLDIP2	6251	6216	5738	6305	6216	5913	5227	5964	6149	5817	5614	7727
PLXND1	9	3	7	2	1	9	1	1	0	1	0	12
AK2	748	631	661	669	599	684	632	580	617	549	465	705
CD38	5	4	4	3	3	3	6	6	4	3	3	0
FKBP4	13019	15679	13242	12159	15416	13784	10087	14683	14173	10796	12187	15804
KDM1A	2089	2089	2173	1989	2132	2473	1993	2023	2109	1911	1767	1480
RBM6	723	774	886	614	695	724	842	656	591	640	819	357
CAMKK1	40	419	48	296	531	299	33	534	29	35	32	302
RECQL	270	213	400	203	166	269	399	214	188	211	260	38
VPS50	180	161	280	106	136	161	199	105	85	134	188	30
HSPB6	10	13	10	7	6	8	16	12	8	6	11	18
ARHGAP33	276	258	235	303	261	240	250	256	246	267	262	385
NDUFAB1	2946	2526	2719	2814	2409	2771	2726	2382	2523	2468	2507	2241
SLC22A16	6	2	3	0	4	3	3	4	6	0	3	1
ZMYND10	138	124	114	137	158	130	107	167	139	142	151	214
ARX	58	56	46	48	55	48	55	59	45	64	37	33
SLC25A13	4	24	36	27	38	50	5	26	38	50	48	9
ST7	3194	3224	2947	2791	2757	2676	2837	3137	2852	2543	2619	2119
CDC27	1720	1530	1712	1371	1228	1469	1773	1301	1056	1467	1433	369
SLC4A1	1	0	3	0	2	1	1	1	0	1	1	2
HCCS	572	542	588	570	542	529	526	532	553	479	479	438
DVL2	1461	1556	1445	1647	1608	1487	1336	1509	1450	1362	1355	1608
PRSS22	4	0	0	0	4	0	0	0	0	2	0	0
UPF1	437	444	395	417	447	406	195	525	358	296	391	475
SKAP2	1382	1221	1445	1121	1008	1103	1391	1125	921	1074	1196	241
SLC25A5	13297	12106	11598	13614	11896	13241	11535	12132	13457	12438	11263	15934
MCUB	23	33	33	30	20	29	41	27	27	36	38	22
POLR2J	1235	1327	1157	1290	1367	1242	1098	1279	1257	1148	1178	1614
DHX33	949	872	1024	800	749	957	1006	781	770	864	814	380
THSD7A	8	4	4	21	12	11	6	6	4	12	10	3
LIG3	653	672	659	592	701	724	459	757	641	549	626	683
RPAP3	442	493	602	278	329	350	548	332	218	343	486	91
ACSM3	578	389	564	449	387	555	682	401	458	458	434	171
REXO5	416	288	352	440	366	380	436	303	319	405	329	335
CIAPIN1	1786	1749	1556	1710	1733	1821	1509	1691	1723	1490	1619	1899
SPPL2B	823	907	875	744	959	772	760	872	755	696	872	1155
FAM214B	424	250	277	338	329	351	305	204	365	219	276	406
COPZ2	4	3	0	2	1	2	0	2	1	0	0	0
PRKAR2B	490	457	469	428	393	415	537	363	292	478	531	84
MSL3	192	202	370	170	157	227	234	215	191	257	157	68
CREBBP	602	659	656	489	629	623	549	549	381	631	444	411
TSPOAP1	74	78	70	78	94	68	60	76	63	68	104	60
GCFC2	286	220	318	226	236	262	328	201	187	231	296	64
WDR54	534	593	529	487	533	540	479	562	554	543	488	930
CROT	48	27	41	58	64	75	94	57	33	50	62	18
ABCB4	5	1	0	5	1	2	2	4	4	1	3	2
KMT2E	831	765	1031	659	644	675	987	643	486	692	748	144
RHBDD2	2420	2314	1946	2445	2336	2199	1946	2421	2462	2373	2280	3847
SOX8	199	273	216	156	218	200	151	210	201	159	202	214
IBTK	1225	1131	1586	984	945	1033	1575	845	695	1062	1176	169
ZNF195	328	262	358	237	224	238	438	244	161	270	306	68
MYCBP2	2468	2095	2786	2655	2579	3180	3536	2261	2366	2603	2314	639
FBXL3	555	492	664	584	507	609	800	421	360	663	744	88
PDK2	691	810	629	686	769	586	577	764	680	621	656	993
ITGA3	297	269	224	236	255	196	209	294	213	258	301	281
ZFX	300	256	383	329	264	282	445	248	189	293	313	47
LAMP2	3361	2949	3521	2585	2258	3021	3609	2646	2406	2791	2760	613
ITGA2B	9	0	8	2	5	9	2	11	0	0	5	20
GDE1	3151	3003	2809	2931	2710	2858	2764	2874	2882	2864	2670	2357
REX1BD	552	558	522	586	621	523	512	617	596	519	587	853
CRLF1	48	41	41	53	27	41	47	38	58	44	34	59
OSBPL7	5	8	2	8	9	6	7	5	2	8	7	6
TMEM98	1735	1670	1514	1821	1881	1656	1514	1795	1710	1627	1635	2148
YBX2	19	21	19	14	15	21	29	15	24	14	24	7
MAP3K14	358	272	326	270	209	218	309	293	286	264	254	157
ABCC8	47	38	17	7	38	33	42	39	32	33	55	24
TMEM132A	3262	3831	3098	3498	3802	3429	2880	3805	3718	3303	3917	5814
AP2B1	12374	12185	10646	12060	12653	12717	10608	12856	12202	11419	10495	10929
ZNF263	1307	1232	1356	1252	1208	1211	1175	1148	1190	1167	1261	978
SPATA20	3788	4949	3755	3988	4789	3911	3446	5071	4119	3933	4515	6365
CACNA1G	15	23	15	22	13	7	16	15	25	21	14	19
TNFRSF12A	32	17	14	17	17	7	15	15	9	16	24	11
MAP3K9	724	649	573	757	685	703	650	599	581	625	621	441
RALA	1096	1064	1192	972	797	1012	1266	885	840	994	1077	273
BAIAP2L1	2388	2308	2201	2196	2144	2121	2011	2245	2243	2087	2064	1804
KDM7A	337	268	381	255	232	333	378	233	173	264	289	46
ETV1	5763	5532	6748	5258	5115	6011	6437	5111	4883	5351	5742	1863
AGK	1314	1283	1327	1180	1165	1364	1328	1154	1171	1287	1163	760
ALDH3B1	45	35	50	57	43	46	44	35	36	33	48	51
PHTF2	578	466	649	445	376	524	686	395	382	562	569	102
FARP2	1589	1540	1540	1515	1388	1635	1553	1327	1374	1418	1335	785
USH1C	0	0	1	0	2	1	0	2	1	1	2	0
GGCT	1733	1348	1750	1426	1133	1453	2146	1208	1288	1581	1449	674
DBF4	274	246	314	222	187	266	376	224	177	285	259	54
TBXA2R	0	6	0	0	2	1	0	2	0	2	3	4
IFRD1	342	301	473	230	238	200	408	234	158	233	363	71
COX10	479	460	463	410	372	440	417	372	401	418	405	311
GTF2IRD1	723	699	622	588	601	600	606	561	607	649	561	604
PAF1	2026	2056	1758	1825	2122	1899	1632	1843	1945	1703	1791	1837
VPS41	1203	1115	1286	953	995	1091	1238	985	987	992	1026	381
ARHGAP44	688	761	660	650	616	614	615	665	584	600	647	488
ELAC2	3296	3576	3135	3115	3356	3338	2788	3384	3301	2911	3051	3574
SCIN	7	4	6	3	6	1	4	7	6	4	3	2
ARSD	2584	2498	2319	2331	2395	2370	2173	2414	2433	2151	2274	2295
PNPLA4	1007	1077	1003	998	1084	1039	839	1027	1056	932	993	1181
ADIPOR2	2150	1925	2064	1985	1935	1983	2082	1800	1947	1847	1756	1255
CDKL3	16	19	18	18	16	16	15	22	19	15	24	9
PRSS21	0	0	0	2	3	0	2	1	3	1	4	1
MARK4	470	498	428	425	529	426	346	500	453	451	478	570
CCDC124	1875	1840	1745	1897	1831	1899	1590	1804	1969	1813	1704	2950
PAFAH1B1	3239	2826	3143	2589	2302	2631	3135	2345	2187	2615	2503	1333
DNAH9	13	11	15	13	15	14	15	13	22	13	6	10
KIAA0100	12063	12370	11078	11617	12276	11906	9643	12430	12131	10473	10083	13106
GAS7	4	0	4	5	5	2	5	2	6	8	3	7
TRAPPC6A	435	560	462	428	535	446	352	511	515	412	502	710
ST7L	718	713	734	634	673	714	633	648	679	588	642	514
TKTL1	3	3	5	2	4	2	0	5	3	3	5	2
RPUSD1	986	1100	946	839	931	895	764	1014	991	866	958	1429
RHBDF1	806	1063	811	842	1041	844	829	983	767	807	1020	1002
LUC7L	175	191	327	161	167	147	315	125	107	174	260	80
CACNA2D2	142	161	150	153	158	99	153	145	131	145	164	128
BAIAP3	214	282	214	212	271	200	172	270	207	224	277	336
TSR3	999	1024	994	1003	1022	948	872	1068	1041	1013	1032	1483
PIGQ	352	443	304	415	344	262	204	293	352	454	394	518
CRAMP1	663	9	667	815	491	747	780	641	467	14	757	476
TEAD3	435	460	419	496	523	453	424	416	421	397	432	450
DNAJC11	2252	2267	2193	2154	2193	2241	1818	2104	2201	2011	1960	2435
FMO3	1	0	3	1	0	1	3	0	0	2	1	0
MYLIP	318	306	317	249	247	267	356	256	282	292	305	178
NOX1	5	1	9	5	5	5	7	5	8	8	11	5
E2F2	142	113	140	158	82	134	124	104	125	126	114	100
PSMB1	4098	3829	3872	3879	3737	3934	3738	3711	3865	3653	3592	3493
JARID2	663	607	653	582	600	666	644	553	530	573	583	330
CDKL5	12	5	18	11	0	10	19	9	1	9	4	0
CDK11A	244	256	287	162	262	191	301	187	179	186	298	99
NADK	2449	2562	2510	2308	2417	2239	2294	2292	2247	2153	2302	2042
DLEC1	4	5	4	3	2	1	1	5	3	6	0	0
CYTH3	2113	2218	2298	1702	1629	1767	1957	2016	1934	1662	1899	1151
ADAM22	234	249	286	231	199	258	271	197	182	226	217	64
SYPL1	2465	2094	2396	2025	1956	2137	2424	2035	1827	2070	2064	930
CYB561	6039	6176	5822	5857	6224	6073	5181	6082	5828	5384	5591	5763
SPAG9	1189	1023	1256	957	817	1046	1189	844	821	1001	950	206
CELSR3	132	162	151	133	133	111	147	138	115	111	154	90
AASS	250	252	321	193	244	276	300	209	174	246	258	89
PLEKHG6	24	23	17	34	26	24	29	27	20	16	15	39
SS18L2	4	8	7	11	10	9	5	11	8	12	2	0
MPND	125	183	87	133	123	178	95	220	144	137	164	196
MGST1	3129	3133	3146	2757	2785	3127	2963	3113	2671	2817	2913	2469
CRY1	370	491	493	295	411	367	488	373	292	402	473	102
NFIX	19434	20871	17583	17999	19223	18471	15778	19379	19580	16679	16116	22226
ST3GAL1	11665	10906	10221	6809	6914	6861	8050	8887	8044	7369	7004	5735
MMP25	18	16	11	29	24	16	16	19	24	19	23	27
IL32	35	50	43	37	58	44	33	59	47	30	47	107
PKD1	354	474	582	452	385	421	387	301	583	254	543	333
MAPK8IP2	482	489	411	480	500	461	384	545	450	399	437	683
MED24	2242	2352	2127	2232	2214	2206	1894	2106	2214	2045	2068	2608
RHOBTB2	451	256	442	636	889	750	405	589	494	595	625	675
HEATR5B	865	948	1071	676	856	868	921	813	658	690	772	332
SEC62	1317	1405	1867	1060	1114	1300	1729	1020	846	1023	1459	239
RPS20	190	230	201	226	135	156	168	128	188	211	203	165
CSDE1	21605	19187	22020	17771	15956	21130	21337	16981	18351	17486	16468	7342
UBE3C	3906	3739	4244	3609	3372	4052	3883	3410	3459	3377	3440	1729
REV3L	30	57	7	142	21	18	101	41	0	0	0	60
TENM1	30	26	45	17	29	21	50	13	20	26	32	9
MASP2	3	1	1	0	0	1	3	2	1	1	3	3
IYD	86	70	97	72	62	104	79	56	54	64	64	24
FAM76A	95	62	56	64	33	58	70	58	67	62	52	25
TRAF3IP3	6	7	1	2	1	5	8	7	5	1	2	0
POMT2	138	134	137	130	119	25	129	116	86	103	133	90
VTA1	2969	2875	3604	1883	1908	2493	3122	2169	1785	2352	2605	690
MLXIPL	31	47	33	26	25	26	40	40	27	36	46	49
BAZ1B	3481	3340	3677	2948	2784	3309	3519	2857	2874	3004	2871	1038
RANBP9	1420	1081	1365	1146	1004	1158	1401	1016	1036	1211	1183	419
ETV7	3	4	1	2	1	0	3	3	1	2	0	0
SPRTN	259	270	324	232	253	268	296	218	177	279	339	83
EEF1AKNMT	1632	1647	1619	1364	1416	1483	1421	1612	1462	1449	1388	1312
DYRK4	326	317	356	355	371	359	339	394	333	328	345	292
ZNF207	6973	6378	6775	5890	5773	6821	6146	6035	5933	5609	5706	4557
UQCRC1	6429	6707	5819	6441	6697	6329	5284	6792	6820	6392	6048	10774
STARD3NL	718	650	756	697	684	806	791	627	657	668	781	326
CD9	7871	8439	7796	7486	7950	8047	7186	8008	7419	7306	7257	6325
NCAPD2	3836	3388	3167	3660	3172	3530	3042	3216	3407	3424	2796	3640
IFFO1	0	2	4	3	0	1	2	1	1	1	0	1
PHF7	184	145	152	168	151	155	184	167	165	167	133	119
SEMA3G	0	3	1	1	5	2	0	0	2	0	5	0
NISCH	1959	2078	2079	1967	2205	2044	1923	2064	1879	1834	2182	2233
STAB1	7	4	6	7	9	9	4	10	3	9	6	13
FUZ	154	136	136	155	194	149	115	219	132	178	152	238
SLC6A13	3	1	2	1	0	1	2	0	1	0	1	1
IDS	1187	1431	1326	1255	1240	1323	1236	1304	1065	1105	1178	714
PRSS3	23	28	26	16	29	22	18	39	25	20	33	30
ZNF200	239	207	122	89	167	241	231	187	177	174	168	90
CD4	16	9	7	14	7	8	8	9	9	11	8	18
LRRC23	217	232	182	259	224	244	224	256	228	236	207	254
BTK	3	0	2	1	0	1	0	1	0	1	0	3
HFE	142	164	159	146	126	127	148	142	147	140	153	84
SCMH1	2707	2797	2358	2514	2720	2435	2315	2523	2385	2335	2391	2774
FYN	42	47	44	37	29	28	39	39	30	45	48	48
HIVEP2	829	759	809	741	668	695	838	640	538	701	712	179
ELOA	1816	1776	1741	1767	1806	2007	1706	1747	1880	1628	1676	1386
LYPLA2	860	857	821	1019	997	1019	807	939	939	887	892	1153
CLCN6	318	321	329	302	330	270	398	271	289	292	328	194
MRC2	5	1	1	3	4	1	2	6	8	1	8	3
NME1-NME2	125	135	205	206	128	229	113	178	169	92	128	187
TSPAN9	1296	1277	1128	1216	1196	1067	1153	1234	1186	1138	1094	1203
BTBD7	0	0	0	0	0	0	0	0	399	0	0	0
APBA3	210	279	165	200	244	189	183	226	191	206	231	295
MKS1	302	300	219	214	244	201	247	206	195	196	268	204
ABHD5	690	690	677	617	594	683	605	601	633	628	654	436
ANOS1	6	11	6	7	13	7	10	12	6	7	12	4
AKAP8L	1095	1240	1179	983	1260	1232	916	1163	1148	1003	1160	1286
MBTD1	333	331	500	218	221	282	424	226	209	245	341	59
UTP18	1199	1124	1263	1045	1068	1197	1149	990	996	1041	1031	476
RNF216	1120	1107	964	934	1057	1064	880	1050	1039	1030	1034	866
TTC19	2002	1803	2023	1753	1683	1979	2082	1682	1779	1794	1841	816
PTBP1	10649	10338	9343	10586	9524	10009	8727	9394	10021	9949	8750	12496
DPF1	116	128	109	130	126	110	117	121	99	131	111	139
SYT7	1183	1199	1053	1095	1236	1103	976	1193	1214	1078	1071	1440
LARS2	2526	2393	2392	2213	2313	2464	2147	2339	2295	2165	2031	1908
PIK3C2A	671	557	1034	397	375	472	1043	388	275	387	617	80
PLAUR	6	6	11	7	4	4	9	6	4	7	2	12
ANLN	922	740	973	703	604	799	999	642	467	728	743	151
WIZ	997	964	731	1072	907	1075	802	925	885	914	828	1002
RABGAP1	1596	1417	1684	1329	1126	1503	1774	1118	1164	1300	1258	371
QPCTL	180	238	184	211	232	195	176	179	217	185	180	319
PPP5C	111	101	122	128	113	123	131	97	133	52	147	90
CEP68	378	359	401	311	328	326	361	313	285	301	336	183
MAP4K3	234	241	285	179	165	162	337	195	140	245	253	45
ZBTB32	21	5	20	15	21	13	20	21	23	14	17	15
TMEM159	490	430	462	473	407	409	486	494	406	491	489	441
GABRA3	179	195	142	190	192	188	163	206	187	184	176	173
BRCA1	100	103	160	108	82	69	93	46	73	117	161	22
ERCC1	972	1126	987	965	981	958	892	1166	1051	938	1033	1341
SEMA3B	247	219	163	246	190	161	255	258	199	153	319	248
MBTPS2	1225	996	1245	1014	897	1226	1195	766	769	907	874	237
PRICKLE3	301	333	307	268	339	287	234	325	300	260	271	366
LTF	29	31	34	27	25	24	25	38	35	26	27	31
EXTL3	17	5	3	16	5	10	4	19	21	14	3	23
ELOVL5	6280	5911	6116	6978	7049	8588	7289	6501	6437	6662	6689	2782
KDM5D	107	56	157	43	60	64	84	62	78	82	103	18
CALCOCO1	616	705	656	545	622	610	501	644	524	545	565	615
UBR7	1587	1441	1436	1555	1369	1528	1446	1455	1425	1461	1415	877
MAP4K5	270	256	388	214	241	294	413	227	184	253	285	48
EHD3	439	440	402	452	396	406	419	385	422	398	383	321
PSMC4	383	548	297	197	411	608	197	274	260	256	209	181
MAN2B2	215	291	165	131	239	212	204	193	149	140	215	223
SLC25A39	5446	5558	4665	5605	5291	5008	4292	5371	5389	5091	5089	8220
MVP	388	401	257	398	391	348	315	416	350	349	375	514
NUB1	1313	1403	1349	1096	1240	1368	1151	1228	1138	1092	1145	725
PGM3	1220	1334	1460	1019	1189	1435	1307	1123	989	1063	1303	365
RWDD2A	948	831	1004	672	644	782	1006	740	749	760	881	338
CLK1	271	354	383	193	258	230	441	248	116	216	393	68
POLR3B	945	848	904	681	648	890	800	712	706	740	688	265
ANGEL1	44	53	30	35	52	31	51	44	40	31	47	27
RNF14	1791	1541	1660	1657	1554	1797	1633	1490	1488	1632	1498	848
DNASE1L1	1014	832	798	1019	837	773	960	858	860	966	838	1114
DDX11	627	581	615	495	534	532	578	538	513	524	571	569
HEBP1	868	941	746	850	810	844	764	851	850	733	817	849
MAMLD1	14	9	9	12	9	9	19	13	7	17	14	11
TACC3	2230	2068	1856	2208	1927	2072	1965	1925	1955	1925	1939	2149
UFL1	829	747	1101	510	503	623	1061	557	317	621	829	118
POLA2	657	552	556	674	523	521	574	551	501	540	541	577
ZC3H3	584	612	475	562	650	513	452	611	614	598	604	925
CAPN1	916	829	371	904	711	559	429	810	501	418	687	1321
ACP3	6178	5569	6164	4995	4605	4981	5099	5196	4947	4445	4103	2696
MDH1	2191	1921	2186	1972	1534	2161	2262	1707	1769	1935	1932	1072
SLC30A9	2382	1999	2955	1850	1593	2328	3011	1511	1658	1956	2050	407
MTMR11	29	38	37	31	28	25	41	24	23	17	26	30
COX15	491	468	448	408	406	454	452	413	417	360	412	275
CCDC88C	782	913	993	766	914	938	867	841	816	746	931	567
YAF2	85	37	38	62	68	43	81	42	52	65	51	39
ZMYND11	1921	1832	2413	1642	1656	1822	2169	1560	1333	1679	1726	423
WAS	0	5	0	3	3	2	3	9	2	5	0	2
BID	146	141	146	133	139	188	114	164	199	139	140	156
MATR3	2640	1968	2436	1018	1926	1832	3001	1527	816	1577	2622	148
NPC1L1	3	4	0	0	4	0	5	8	7	7	4	8
XYLT2	78	33	51	49	40	52	75	58	21	53	13	29
RGPD5	549	223	240	3	185	542	367	86	159	5	267	2
STMN4	5	3	6	7	6	6	8	5	4	3	6	2
NUDCD3	2714	2959	2514	2724	2954	2800	2181	3022	2843	2397	2588	3618
ISL1	6	0	1	7	1	4	1	3	2	6	5	4
CHDH	878	775	868	692	678	642	844	716	626	667	720	428
IL20RA	21	13	19	19	12	12	19	16	11	10	15	17
GLT8D1	854	870	981	683	761	811	851	771	724	734	820	447
ATP2C1	2271	2296	3072	1753	1955	2543	2335	1927	1949	1978	2351	1079
IGF1	4	1	5	3	0	3	0	4	3	5	5	1
SLC38A5	1	2	0	0	2	2	2	2	0	2	3	1
RALBP1	1869	1838	1957	1820	1684	2065	1894	1611	1608	1786	1743	619
RUFY3	269	240	303	223	166	214	298	208	159	193	212	69
SLC11A1	98	107	100	99	92	63	80	112	101	80	89	116
WWTR1	15	13	12	32	38	19	35	26	11	31	20	17
AGPS	151	154	140	90	71	131	112	90	99	121	122	13
CXorf56	492	408	447	437	436	455	442	419	428	398	411	320
ATP1A2	0	0	0	2	2	1	0	2	1	1	2	3
TTC27	623	580	621	541	527	686	572	520	543	466	476	333
ZNF582	82	61	103	64	82	88	126	71	79	103	109	32
VSIG2	1	2	5	3	0	0	3	3	2	6	0	3
PHLDB1	682	713	633	617	648	622	629	712	596	625	686	686
PRDM11	102	103	76	86	94	100	91	86	101	90	98	75
SYT13	10	4	6	6	13	5	7	9	2	7	8	5
SNAI2	4	2	5	176	123	145	67	30	34	57	52	21
ZRANB1	521	479	548	449	386	520	500	371	395	439	411	179
NCDN	1881	1957	1747	1820	1550	1531	1546	1555	1680	1524	1424	2044
ADGRA2	0	0	6	0	0	0	4	0	0	0	0	10
ZFP64	595	550	576	569	566	580	517	601	590	564	563	627
MNAT1	334	272	333	255	229	258	376	213	177	277	317	74
SAMD4A	29	12	29	22	10	12	21	8	14	13	15	14
MRE11	153	127	269	121	130	158	211	124	129	147	158	46
PLEKHB1	5754	7587	5602	5873	7652	5986	4942	7918	6581	5572	6557	8204
CYP3A43	2	2	3	2	4	2	2	2	1	3	2	0
SLC7A9	1	3	1	0	4	2	5	1	1	0	3	0
SPAST	88	10	109	15	53	52	121	119	96	76	303	4
NRXN3	3	3	1	1	0	1	2	1	2	2	3	1
OSBPL5	1131	1397	1186	1024	1232	1082	906	1254	1187	1050	1121	1381
AQR	1637	1669	1720	1329	1379	1660	1465	1455	1305	1404	1344	643
RTF2	2156	2086	1950	2181	1979	2189	1988	1956	2038	1872	1836	1693
NLRP2	1493	1481	1460	1390	1636	1392	1174	1630	1529	1358	1393	573
SLC45A4	263	255	239	279	304	211	220	248	228	255	233	201
RNF10	7054	6801	5939	6419	6456	6323	5636	6635	6493	5985	5578	7266
ZNF839	422	450	424	397	374	384	464	372	355	374	444	332
ZDHHC6	595	657	709	544	608	675	571	516	518	465	617	277
GRAMD1B	0	1	1	2	1	1	0	0	0	3	0	1
RNH1	0	100	57	0	92	0	53	0	39	69	84	106
NDUFS1	4132	3901	4162	3549	3318	4074	3848	3608	3594	3502	3428	1738
RB1CC1	563	576	780	335	360	330	652	358	188	419	608	52
ERP44	1417	1511	1589	1234	1603	1701	1413	1520	1428	1333	1481	1009
ALAS1	2498	2549	2044	2558	2460	2407	2132	2613	2305	2505	2407	2913
AKAP11	832	794	978	671	606	677	999	570	443	639	657	115
GLRX2	205	171	226	209	183	232	382	173	131	217	335	44
SNAPC1	114	120	179	100	104	88	165	116	83	140	153	37
DERA	578	547	562	568	508	606	570	553	573	545	501	454
STRAP	5469	4751	5213	4460	4033	4649	4977	4034	3977	4235	4162	2143
ABCC2	1	1	0	0	0	1	1	1	2	0	1	2
DEF6	296	326	253	275	270	283	247	268	295	280	300	292
PLEKHO1	78	98	69	79	81	84	64	84	78	69	75	80
GCLM	903	645	745	727	613	683	931	612	522	725	768	270
UBR2	1029	913	1002	672	693	789	985	699	649	737	767	208
DEPDC1	395	231	396	380	258	320	618	241	237	435	367	62
CCDC28A	201	181	187	163	132	185	192	174	150	169	202	101
RRAGD	100	108	97	132	116	127	116	116	125	122	74	78
HSF2	216	228	311	218	163	196	251	194	168	176	173	92
PHF20	1775	1672	1945	1272	1224	1606	1490	1371	1352	1373	1327	518
HSD17B6	23	15	30	15	18	23	24	18	19	20	14	14
NR1H3	336	391	329	304	352	317	248	386	361	278	361	484
TYMP	275	347	279	263	377	244	196	340	253	250	318	437
NCAPH2	752	803	673	788	791	693	629	777	738	787	718	1126
TOMM34	2344	2464	2099	2335	2305	2299	2159	2313	2265	2175	2085	2265
SEC63	3318	3132	3814	2606	2676	3531	3535	2639	2491	2739	3032	951
KPNA6	2331	2352	2248	2019	2005	2307	1999	2045	1946	1908	2113	1052
VIM	210	235	207	213	255	205	199	249	188	170	199	243
RTEL1-TNFRSF6B	61	55	71	70	63	64	82	61	40	74	77	24
FAS	59	43	59	38	35	28	71	32	33	46	47	9
RNASET2	19	28	124	36	17	24	37	18	24	16	25	106
CD44	0	0	1	1	1	2	1	1	2	2	0	0
KCNG1	317	322	306	232	246	228	235	283	255	219	267	355
AGPAT4	0	1	3	2	1	2	1	1	1	1	2	0
BTN3A1	196	203	183	192	185	153	166	184	175	170	223	132
MIPEP	843	944	871	785	865	939	783	934	877	782	799	752
PRKCH	290	214	257	314	213	284	364	240	255	293	235	163
IFNGR1	2	14	5	8	5	5	12	6	8	5	0	0
B4GALT7	641	752	645	675	696	629	595	701	660	638	688	810
SH2D2A	2	1	1	2	1	1	1	2	3	1	4	3
VRK2	38	38	45	28	29	14	17	27	10	24	21	3
TNFRSF1B	2	6	1	6	7	0	4	3	4	5	4	4
VEZT	1471	1295	1676	1139	1125	1328	1595	1160	1034	1278	1494	345
POU2F2	8	3	4	2	5	3	1	1	4	2	1	3
BRD9	657	661	720	689	711	698	674	660	669	623	691	650
SNX1	3001	3148	3076	2738	3019	3112	2722	3051	2949	2612	2821	2248
TBPL1	704	598	775	764	634	761	914	678	600	735	771	401
ARNTL2	258	199	248	213	203	197	264	191	179	237	221	32
BCLAF1	3757	3260	4375	2680	2278	3065	4191	2469	1901	2767	2769	624
SLC39A9	3191	2905	3117	2842	2570	2988	3173	2696	2833	2815	2615	1447
ANK1	15	16	11	17	33	32	21	11	19	19	17	15
TFB1M	236	214	266	169	212	231	211	210	235	197	204	168
RABEP1	1313	1166	1537	1046	1002	1192	1517	963	868	1168	1165	244
HMGB3	1645	1217	1308	1562	1157	1497	1677	1180	1286	1400	1213	818
NUP160	1310	1274	1410	1113	1114	1340	1253	1268	1151	1139	1161	536
BAK1	854	866	694	877	867	801	736	835	790	813	807	1210
IKZF2	65	50	58	29	32	32	81	34	21	52	65	10
GRN	1914	2193	1752	2071	2233	1970	1519	2192	2194	1983	2047	3478
FAM13B	1375	1244	1402	1114	1103	1157	1564	1153	910	1215	1351	183
CENPQ	71	68	41	48	57	22	67	35	10	47	78	10
SARS1	6704	6789	6174	5978	6262	6215	5522	6551	6586	5850	6058	7531
RANBP3	1721	1810	1600	1548	1783	1655	1439	1685	1711	1582	1606	1914
ARID4A	21	1	8	11	3	15	4	26	0	0	1	12
EIPR1	65	47	48	39	34	6	40	38	15	46	33	24
PNPLA6	925	1269	913	806	1008	990	580	971	910	915	1151	1257
IFT88	216	234	282	174	175	183	286	176	143	182	211	51
ALG1	135	49	121	149	134	113	81	45	63	147	65	133
ZCCHC8	34	59	80	37	26	17	37	14	19	32	45	11
ABCF2	1507	1543	1434	1386	1588	1537	1102	1505	1549	1160	1330	1655
CHPF2	1252	1372	1254	1330	1542	1420	1117	1386	1327	1186	1438	1606
LRRC7	28	31	49	20	17	24	40	26	14	23	26	13
FUT8	453	418	546	323	290	347	467	315	315	332	348	92
UBA6	661	672	957	453	599	557	901	530	324	510	768	79
GAB2	62	58	59	68	77	70	88	57	46	85	71	69
ATP6V0A1	1480	1874	1394	1554	1900	1478	1512	1717	1817	1362	1438	2152
PIAS1	225	210	251	263	256	300	252	243	155	205	159	175
SLC4A7	497	431	545	318	334	363	590	347	200	326	405	41
APBA2	283	314	304	303	213	254	187	312	296	259	290	354
MAP2K3	608	810	772	722	734	717	685	1116	688	729	869	1070
TMSB10	1026	1009	921	1140	1193	1121	1026	1091	1162	977	1161	1529
ASTE1	6	1	27	29	18	5	36	60	30	26	23	6
RNF19A	636	545	684	410	337	507	598	374	354	548	514	110
PEX3	448	385	429	368	357	400	428	338	316	382	398	161
GABARAPL2	2334	2289	2266	2139	2235	2238	2203	2224	2092	2053	2145	1652
SH3YL1	140	186	179	102	126	110	168	107	120	132	168	44
FAM136A	1122	1023	1128	1041	1008	1178	1109	888	1024	954	976	727
VCL	597	515	526	657	758	728	511	573	538	626	507	565
DEPDC1B	360	258	368	309	220	318	391	228	193	314	292	80
DAPK2	162	175	129	136	117	89	136	139	106	115	123	82
NSMAF	626	673	713	881	995	1116	713	744	708	718	794	464
ADSS2	660	638	821	509	534	663	708	563	495	560	634	157
TIMP2	1958	2010	1707	1760	1769	1599	1464	1917	1686	1538	1583	1920
RFC1	1448	1374	1640	1249	1095	1340	1764	1175	1029	1352	1444	269
TBC1D23	351	307	436	198	216	280	420	202	203	261	287	42
CUL3	1735	1575	1744	1363	1247	1455	1589	1232	1216	1375	1476	455
MYOM2	41	33	29	35	18	28	36	22	30	30	28	37
CYP46A1	3	7	5	6	7	3	11	4	1	7	8	3
ZZZ3	753	630	935	586	479	628	958	513	444	601	674	98
USP2	167	186	176	169	137	130	151	157	142	107	135	151
TUBG2	331	338	306	305	362	294	319	342	291	370	370	403
RPL26L1	920	761	915	834	717	896	979	680	787	827	818	527
FLT4	56	59	56	43	51	39	40	46	47	55	49	54
NSUN2	2613	2239	2551	2245	2200	2547	2419	2003	2228	2128	1964	1317
FBXO42	804	765	669	1035	915	986	837	745	777	888	864	663
MFAP3	623	520	673	495	491	649	617	516	445	549	479	165
MRI1	440	452	418	354	448	382	398	366	328	360	449	336
METTL1	563	590	497	518	585	492	405	575	597	478	496	686
HOXC8	4	1	4	1	0	1	2	3	3	2	1	3
AGA	854	991	959	785	900	913	842	904	790	775	885	554
PI4K2B	422	304	421	283	220	341	538	246	226	365	333	56
BOD1L1	512	571	657	425	391	427	715	429	227	413	562	153
MAT2B	784	690	816	647	714	760	815	696	588	726	808	379
TLL1	466	496	554	302	253	265	425	328	271	341	397	86
EDC4	1517	1585	1467	1418	1497	1507	1391	1519	1498	1439	1478	1632
TRIO	1130	977	1053	1144	1155	1259	1183	956	1017	1060	1053	572
CLEC16A	798	936	812	683	843	837	669	836	780	666	818	642
CDH1	13489	13060	12394	12034	11881	12285	12317	11831	12178	11433	11484	7651
MTREX	1340	1247	1653	772	783	1140	1251	857	839	847	864	190
DNAH5	124	151	190	127	174	151	185	134	97	120	170	65
ZFYVE16	825	781	1044	710	674	861	1161	677	449	706	879	190
RIPOR1	1496	1769	1532	1504	1799	1577	1314	1718	1668	1404	1415	2122
RAI14	559	519	596	397	377	485	598	368	323	428	416	113
PNKP	424	430	421	367	445	361	416	408	356	406	477	540
PHLPP2	381	328	383	329	289	347	413	289	278	341	338	98
SPDL1	305	255	377	215	209	277	424	190	156	238	284	48
STAU2	979	999	1094	772	757	944	1007	817	714	842	916	267
SLC66A1	179	192	162	187	193	176	162	162	185	213	184	201
CTNS	4	0	17	2	1	5	0	5	13	9	7	2
RTN4R	187	218	203	175	174	167	147	201	193	169	175	230
PHF23	2389	2427	2176	2647	2611	2549	2028	2453	2499	2189	2264	2534
INPP4A	294	322	297	244	232	277	352	236	205	208	305	110
RAB27B	179	162	247	89	93	87	220	107	55	110	153	9
PSMA4	3932	3171	4290	3223	2903	3459	4577	2523	2927	3343	3726	930
LSG1	1779	1857	1873	1466	1619	1759	1704	1692	1601	1457	1514	1004
PARP3	587	624	583	589	608	567	537	601	572	610	602	638
TNC	17	15	12	20	18	20	16	14	20	16	17	17
THAP3	407	363	328	332	341	306	329	352	332	312	362	415
RIPOR3	0	2	2	1	2	0	3	3	2	0	0	0
TDP1	766	666	671	511	570	651	481	593	582	511	547	527
AIFM2	53	51	61	39	47	34	51	47	43	56	69	38
SPATA7	238	209	230	218	206	218	269	198	159	216	215	136
MED17	836	804	901	803	735	911	811	753	727	746	891	317
RETSAT	2163	2067	1925	2208	2194	2138	1963	2233	2127	2068	2082	2269
CAPG	17	19	13	19	15	9	14	23	13	17	24	22
AP2S1	2046	1875	1736	2168	1895	2110	1618	2086	2112	2134	1741	3054
TG	2	2	5	12	16	7	5	4	4	5	4	4
DCUN1D1	432	404	491	333	322	255	542	308	147	403	433	69
JADE2	385	368	276	364	391	380	375	426	355	397	325	366
ZIC2	572	513	548	375	420	405	454	463	492	406	447	348
LCP2	2	0	0	2	0	2	1	2	1	3	2	1
TRIT1	63	7	73	24	33	17	49	5	29	72	50	34
CUL7	190	231	234	310	279	335	255	367	316	340	274	340
CTNNA1	10431	10706	9747	9982	10212	10485	9631	10422	9746	9809	9589	7588
PHKA2	54	65	97	46	48	44	71	79	58	40	95	24
CNTLN	204	152	237	187	155	230	324	185	159	212	241	38
EPHA3	40	26	28	21	20	29	35	24	18	27	27	10
HSPA5	22765	23908	20857	21081	26740	25476	19781	22025	21405	20588	21495	15337
DSG2	3276	2951	3709	2709	2528	3314	3811	2553	2298	2867	3004	628
GEMIN8	383	425	438	363	463	440	391	460	433	377	391	478
OFD1	35	56	60	37	42	35	85	46	22	49	79	6
GPM6B	81	70	74	69	79	58	84	63	49	60	70	17
MAGEC2	71	65	53	68	55	61	49	83	47	55	51	42
PREX2	12	7	11	7	8	9	10	4	4	12	6	1
WDR37	58	40	111	118	65	55	45	36	93	120	64	41
YTHDC2	655	732	930	506	586	683	785	569	482	548	632	124
CTPS2	880	730	760	822	751	862	784	718	844	697	701	637
ATP6V1H	1977	1721	1635	1772	1496	1592	1824	1665	1551	1671	1648	1207
POLR2B	3825	3535	4552	3036	2835	3733	4166	3197	3101	3129	3244	1063
FAM214A	1166	1113	1420	1006	898	1012	1603	966	576	1094	1260	198
ARAP2	48	36	57	40	36	38	78	27	26	44	39	3
TPR	689	744	1205	499	575	545	1181	562	315	538	763	158
CP	10	3	5	2	2	1	7	5	6	4	2	0
KIAA0556	922	1039	942	820	1007	849	854	969	901	786	944	851
DTNBP1	85	70	126	106	106	113	127	117	120	109	113	107
ANO2	23	26	17	17	9	11	8	16	11	20	13	12
C12orf4	311	313	403	213	280	314	369	239	228	255	320	49
SCML1	272	258	303	204	242	216	315	209	155	209	261	52
WWC3	10	3	12	11	13	10	18	13	8	17	11	13
ARHGAP6	819	762	760	1022	913	924	1049	834	727	967	915	385
MAP4	9746	9484	8343	9003	8686	8991	8076	9259	9327	8700	7930	9440
GOPC	522	405	611	369	364	473	560	335	317	431	476	92
USP28	583	550	646	533	585	668	641	597	555	566	566	247
HDAC9	3	0	0	3	2	1	4	4	0	1	4	0
TSPAN17	1681	1690	1543	1735	1742	1664	1411	1658	1551	1570	1646	2341
NOP16	244	265	290	202	215	280	222	200	303	260	192	234
CC2D2A	59	63	41	65	54	63	72	62	49	55	57	80
RRM2B	3	25	54	34	45	51	32	47	1	14	13	7
ZNF800	334	299	383	287	225	259	356	284	176	303	298	57
SNX29	763	777	720	672	757	781	588	749	696	680	678	615
MRPS10	776	728	797	657	579	745	734	674	660	587	607	400
RSF1	815	733	1026	561	511	649	947	529	372	552	717	123
VPS13D	1699	1793	1712	1426	1556	1698	1683	1626	1519	1442	1410	768
FAM120A	6170	6276	6384	5205	5546	5926	5253	5464	5262	5114	5113	3202
R3HDM1	1283	1233	1380	1061	1022	1216	1235	995	1093	984	1059	578
COL9A2	146	133	151	138	128	136	108	134	151	122	125	153
KITLG	116	122	110	75	49	69	132	75	54	105	73	14
ERCC8	29	29	26	34	35	26	37	37	21	19	19	10
ADAMTS6	6	5	9	3	7	8	9	7	3	9	7	0
H6PD	274	233	187	365	266	324	210	318	278	302	201	552
VAMP3	2623	2357	2230	2600	2264	2544	2435	2405	2476	2357	2139	1915
PER3	775	582	763	550	445	517	814	546	509	580	603	151
EPN3	1619	1780	1463	1419	1538	1359	1262	1665	1630	1555	1540	2068
LTBP1	63	55	49	54	38	34	60	40	34	58	37	28
RCN1	45	39	117	31	21	19	59	56	15	36	23	11
ELN	11	4	11	8	14	5	14	7	10	15	14	10
RFC2	930	811	859	980	727	962	922	777	952	879	802	992
ARID1B	739	827	843	636	522	595	791	762	589	542	650	274
CLPTM1L	2772	2726	2458	2371	2710	2808	2338	2463	2704	2769	2519	3019
NEDD4L	3661	3342	3484	5932	6240	6404	5044	4780	4858	5128	4945	3787
FOXP3	25	4	1	6	2	12	16	2	7	8	18	21
PPP1R3F	66	51	40	64	67	76	47	61	57	76	56	86
HEXB	3051	2403	2946	2693	2426	2888	3104	2349	2565	2430	2430	1330
PTCD2	691	579	787	518	474	587	719	531	468	546	593	240
NEXMIF	30	43	102	43	102	32	80	7	17	80	117	0
JKAMP	819	757	939	651	650	842	1018	582	588	640	771	270
DKK3	1	3	0	5	0	0	3	2	2	2	0	1
ARHGEF5	840	962	758	875	846	876	730	795	779	931	1024	982
NFE2L3	264	246	303	223	243	273	329	235	219	256	281	80
MCUR1	1042	866	1031	928	914	972	1051	929	780	890	984	488
LIMA1	1496	1312	1464	991	909	1111	1348	1078	927	1109	1204	295
LETMD1	1556	1458	1467	1381	1336	1393	1477	1504	1371	1443	1340	1370
SLC4A8	8	3	4	5	2	3	3	2	0	3	1	0
LAMC3	30	33	32	29	46	29	16	34	24	42	29	50
PTGER3	7	5	1	3	3	4	9	4	3	2	8	3
MAPK9	1430	1208	1367	1133	992	1135	1459	1049	985	1146	1148	543
COL23A1	16	18	7	8	14	9	12	8	7	16	9	18
BCAR1	568	926	605	518	572	655	330	636	964	561	742	706
FAM160A2	375	307	477	283	324	302	360	374	268	250	356	221
HERPUD1	2214	1666	1799	3038	2619	3087	2220	2155	2301	2875	2340	2677
HOMER3	333	420	298	323	405	362	268	406	388	353	370	526
RAD51	236	196	200	262	197	254	241	194	267	239	219	253
POLQ	190	161	232	149	115	136	269	128	95	134	162	34
PIK3CB	2013	1787	1859	1567	1428	1673	1868	1571	1543	1602	1569	557
THOC3	108	25	67	79	23	22	77	21	50	33	23	29
HEBP2	2245	2076	2303	2255	2525	2766	2341	2330	2370	2255	2503	2035
MPHOSPH9	188	95	208	232	174	293	303	142	123	187	242	57
PLEKHA5	395	378	506	326	324	364	468	305	273	371	416	88
PRSS8	2264	2710	2228	2206	2661	2233	1883	2681	2506	2122	2196	3742
SIKE1	531	470	667	411	397	449	728	383	302	475	569	109
RRP12	29	37	46	23	61	18	44	56	16	103	45	16
FNIP2	488	379	569	476	353	562	608	374	411	481	459	119
MSMO1	907	878	889	769	829	927	871	803	680	678	713	242
TTC17	1211	1166	1419	1007	1031	1154	1246	1066	1074	1025	1107	594
ALX4	161	155	131	170	164	161	157	163	158	168	139	163
FSTL4	8	16	14	16	9	11	11	8	7	17	6	11
FOXN3	1581	1309	1452	1160	1003	1305	1434	1217	1184	1284	1063	422
AKR7A2	909	1057	935	1004	1137	1015	784	1016	1047	918	969	1480
MRTO4	794	755	719	725	784	804	627	723	785	636	581	775
NNAT	5	5	5	4	6	2	4	7	2	2	8	2
USE1	672	743	700	670	769	744	576	763	742	597	669	1130
MCF2L2	17	18	15	25	30	32	37	20	15	25	26	14
NRIP2	21	26	24	22	21	18	21	25	13	12	23	10
LAMA3	794	736	889	1134	1055	1216	1330	852	838	967	1026	541
AP5M1	617	600	750	413	446	563	679	430	367	462	564	150
ANAPC4	51	69	85	83	74	66	87	55	68	55	74	45
TRAPPC3	1472	1321	1326	1396	1360	1444	1304	1370	1337	1253	1313	1316
THRAP3	6182	5309	5605	6855	6497	8257	6786	5183	5305	6507	5918	2707
PHPT1	546	498	540	506	594	536	534	526	544	499	595	752
ENTPD2	181	219	213	185	227	198	157	236	221	193	196	344
ARID4B	468	353	616	295	341	296	657	240	192	342	535	57
OPN3	25	26	30	29	17	26	26	31	19	26	25	17
SDCCAG8	281	379	244	355	363	323	354	334	305	359	357	262
PTPRN	11	9	6	12	8	14	7	12	10	3	11	14
KIF1B	4016	3328	3757	3340	2866	3324	3775	2849	2919	3078	2688	1422
FOXC1	8	4	5	10	11	8	12	7	2	8	3	2
TBC1D22A	529	557	577	601	585	610	478	627	583	551	539	752
SYNE2	1135	1091	1104	759	771	812	1065	855	746	908	814	453
PLEKHH1	58	47	90	130	57	14	118	29	8	94	59	3
ATP9A	333	483	688	458	355	348	0	373	462	167	337	220
FAM168A	2526	2517	2241	2323	2360	2303	2196	2367	2160	2128	2149	1668
RELT	104	127	136	146	146	136	112	136	104	122	107	109
GALC	7	3	6	7	3	3	6	6	6	4	5	5
NOP58	684	529	908	466	447	611	990	435	397	536	628	137
SZRD1	3737	3924	3346	3747	3728	3597	3180	3640	3678	3368	3183	3911
KCNH2	73	63	28	77	82	72	65	63	61	70	73	88
CUL1	1821	1787	1906	1434	1374	1616	1645	1539	1346	1455	1607	643
FAM114A2	681	597	652	522	549	651	625	552	491	548	607	226
CYFIP2	3172	3219	2849	2750	3114	2938	2503	3192	2972	2665	2723	3059
TAB2	1558	1335	1371	1257	1131	1355	1538	1073	1024	1254	1258	385
GINM1	941	821	896	796	742	920	922	766	739	862	832	455
EIF2AK2	836	791	903	737	686	828	981	649	623	712	742	205
USP36	1031	1033	1124	815	880	873	913	922	996	832	853	891
KMT2C	868	751	958	561	578	530	1045	532	461	514	731	301
CCDC85A	95	59	81	79	71	79	100	58	39	69	94	19
PUM2	1624	1601	1989	1232	1206	1535	1757	1151	1057	1298	1353	236
MRPL43	858	835	765	823	807	862	700	855	881	807	830	1062
ITIH4	1	6	11	5	8	3	10	7	8	5	15	3
HPF1	506	489	515	434	432	512	628	464	455	427	511	208
ZFR	1970	2074	2359	1523	1630	1899	1945	1619	1384	1732	1790	316
ZNF280C	40	47	63	34	34	36	61	37	14	30	47	4
PHF21B	2	10	5	1	5	4	8	2	6	3	7	3
RC3H2	1739	1464	1744	1414	1135	1480	2022	1179	1005	1435	1432	293
IL17RB	182	192	184	153	141	128	200	133	120	126	169	74
TRAF3IP2	454	408	357	399	368	368	313	383	338	396	349	368
GYG2	471	412	404	428	399	378	394	426	398	407	377	375
DCBLD2	153	173	166	116	122	142	176	132	99	153	133	41
SOAT1	779	682	743	758	746	860	901	687	660	854	793	234
PKP2	40	44	43	39	42	44	72	54	54	42	50	29
F7	0	0	0	0	0	0	0	8	0	0	0	4
GDI2	8822	8004	9049	7148	6904	8842	7656	7139	7948	6614	6437	4347
PRDM1	1	2	1	5	2	3	6	0	0	6	4	0
ATG5	658	510	729	519	421	556	769	471	390	572	607	156
TMCC3	13	13	8	222	189	258	73	49	61	123	57	37
PITHD1	518	567	606	652	648	695	606	587	631	621	646	454
MTA3	609	559	558	570	589	616	621	565	612	540	530	425
USP13	1012	801	930	1059	940	1158	1136	923	925	1088	1042	379
ATP11B	1937	1604	2155	1624	1558	1967	2503	1441	1282	1719	1910	315
CDK14	539	467	513	414	429	451	542	423	358	435	442	110
SEC61A1	17054	18455	15463	17499	19837	18807	14393	18527	17921	16201	16901	20044
PPP1R12A	1416	1241	1487	1032	926	1146	1548	944	736	1142	1340	151
RASGRF1	0	0	3	7	0	1	2	1	0	5	6	0
CAMK2B	632	687	591	571	682	623	572	687	663	582	660	687
CROCC	162	185	175	147	165	161	169	148	154	168	171	167
POLR3E	1012	1143	1098	947	1180	1192	941	1026	954	892	1058	911
ATP2B4	63	281	164	191	236	101	271	411	172	301	244	9
ZC3H11A	1054	1076	1447	815	843	1080	1408	779	678	915	1216	189
RIOK2	368	356	433	216	308	333	411	273	267	299	323	103
YIPF1	984	929	951	889	892	937	779	846	947	836	871	1073
NDC1	1714	1354	1635	1352	1149	1533	1652	1264	1286	1449	1232	651
FLYWCH1	533	562	489	489	596	437	429	559	497	500	475	668
UNKL	780	762	670	699	590	559	779	586	486	721	628	362
TBXAS1	19	38	53	30	30	29	43	45	33	35	48	29
PARP12	474	508	438	454	431	448	435	468	419	410	431	434
ALDH18A1	4756	5171	4846	4863	5427	5346	4329	5167	5136	4481	4339	4913
TARBP1	360	422	393	299	332	274	433	304	263	263	359	101
GATB	900	903	842	791	787	880	738	838	914	859	778	852
MXD1	222	178	197	218	177	206	243	132	151	197	196	68
CDK17	206	203	216	154	134	177	245	145	107	169	179	34
DNAJC25	258	268	292	244	309	246	304	237	173	215	276	88
SLC2A3	1	0	0	63	91	108	12	12	18	30	19	25
PSD	45	62	49	32	31	46	38	48	53	34	47	81
CTDP1	584	595	477	544	589	524	527	477	482	554	572	551
YBX3	4648	4475	4305	4860	5081	5383	4057	4555	5157	4392	4303	5245
STYK1	224	134	199	282	221	267	323	175	206	253	229	120
WNK1	3722	3465	3459	4011	3738	3889	4642	3353	3266	3700	3410	1728
CCAR1	2319	2155	2898	1818	1949	1975	2749	1885	1390	2140	2638	378
OGFR	1254	1458	1187	1168	1355	1200	1022	1266	1295	1221	1227	1576
PIGV	31	34	37	41	32	60	49	34	39	37	26	14
PTPRU	889	1003	884	801	948	786	742	961	800	819	847	1042
SNRNP40	1570	1662	1690	1737	1870	1973	1507	1709	1765	1526	1599	1444
RIMBP2	2	0	0	3	1	0	1	0	0	0	2	1
QSER1	490	629	764	339	410	710	716	570	210	494	618	164
MPC1	500	476	433	472	371	424	470	433	451	444	432	343
ACAA1	2167	2150	2012	2453	2436	2357	2003	2306	2108	2139	2229	2565
BCAT1	3	1	5	4	3	4	4	5	1	2	4	6
HDAC7	937	1100	914	918	1015	867	895	972	897	909	1036	1112
LZTS1	21	13	5	10	13	11	15	22	11	23	16	14
PRDM6	0	1	2	1	2	0	4	0	0	3	5	1
SPAG4	12	11	6	18	18	9	19	12	20	10	4	30
NCKAP1	2200	2115	2454	1765	1836	2039	2718	1749	1300	1980	2379	311
MRPS35	3039	2623	2905	2514	2483	2899	3005	2479	2499	2756	2684	1329
GUCY1B1	0	2	0	15	9	4	18	2	22	4	3	0
SFSWAP	110	69	119	62	52	107	88	58	101	39	72	34
TNK2	76	113	89	208	144	157	125	113	173	85	123	204
MON2	924	957	1096	785	808	958	1165	791	655	765	920	197
CDH3	27	25	26	17	17	15	18	24	21	26	13	25
GPBP1	1026	906	1273	794	688	933	1174	692	642	774	896	184
DGAT2	975	974	810	735	791	728	758	825	742	764	699	780
ZNF112	47	56	75	41	28	49	68	28	38	47	68	10
CS	10804	10091	9225	10377	9718	10168	8916	9798	10712	9303	8455	11406
MRPS24	1923	1765	1667	1865	1860	1904	1548	1926	1888	1816	1786	2731
ELMO2	1256	1236	1133	1363	1428	1381	1127	1318	1221	1266	1324	1225
WAPL	722	609	772	598	500	560	719	496	491	537	606	155
VMP1	2400	2141	2413	2384	2434	2785	2474	2284	2456	2253	2204	1463
APPBP2	1381	1161	1439	2078	1818	2208	1925	1212	1098	1705	1651	377
POLD1	111	58	149	141	51	176	102	172	209	234	59	113
SEZ6	4	6	4	4	1	2	5	3	7	2	1	4
EIF4B	8857	9029	8740	8280	8984	9439	7532	9424	9247	8036	7972	8545
BICRA	246	247	214	266	232	221	205	210	248	201	219	291
SPHK2	483	621	570	528	683	642	379	479	566	447	577	917
RPL18	14102	16022	13531	14133	16621	15437	11621	16797	16127	14175	15656	23933
CA11	152	179	150	160	172	167	135	171	174	126	167	226
ISOC2	1750	1777	1473	1686	1756	1689	1429	1735	1826	1651	1456	2939
U2AF2	4988	5272	4703	4782	4828	4920	4163	4613	4888	4407	4311	5721
EPN1	3467	3875	2971	4170	4296	3880	3059	4010	4120	3787	3774	7303
MED29	2461	2452	2342	2281	2270	2275	2139	2409	2284	1931	2141	1828
AHRR	1	0	0	0	1	0	1	0	0	4	0	3
ZNF275	16	31	16	16	14	30	10	6	5	13	2	2
MTMR1	1267	1247	1331	1256	1234	1402	1244	1292	1064	1131	1275	591
GPC1	554	696	502	635	737	597	484	715	572	627	709	921
ADCK1	429	490	386	380	405	370	329	423	410	398	402	484
HAGH	1193	1332	1095	1221	1296	1148	1068	1213	1136	1191	1201	1477
RNF4	3046	2633	2610	3010	2803	2988	2873	2664	2657	2848	2577	2224
CASP8	260	260	293	224	220	209	321	220	197	254	243	108
LIMCH1	6548	6004	6425	5879	6157	6829	6862	6074	5072	6266	6164	1859
INTS13	584	564	764	364	390	516	548	428	426	400	492	106
TM7SF3	2364	2287	2273	2160	2187	2273	2201	2186	2139	2058	2071	1610
DLX3	4	1	3	2	2	1	8	5	3	5	0	2
SPA17	145	115	135	152	125	166	156	136	110	144	109	65
ATP2C2	88	137	43	128	86	40	138	166	94	77	61	74
NGFR	12	16	8	13	6	10	20	12	6	5	15	15
CDON	379	358	340	361	327	393	390	299	365	363	334	239
TAF2	619	617	730	527	474	615	676	542	461	578	634	151
HIPK2	2565	2651	2308	3198	3280	3353	3144	2486	2292	3041	2873	1035
TNPO3	1821	1595	1779	1657	1493	1759	1635	1433	1535	1414	1429	961
BORCS8-MEF2B	62	65	79	35	47	39	75	30	73	39	36	107
RFXANK	1188	1342	1146	1195	1305	1240	1024	1291	1305	1219	1253	1974
TMEM161A	183	259	221	195	316	320	264	201	221	239	288	309
LPAR2	439	472	450	469	557	469	368	527	439	433	480	684
CTSA	58	57	34	78	73	42	78	66	73	45	32	43
SUGP2	2053	2161	2344	1845	2011	2075	2140	1842	1778	1754	2000	1120
SLC12A2	1101	951	1371	795	698	818	1269	724	578	793	869	164
SNX24	111	85	105	116	95	96	150	98	99	107	107	48
EYA2	95	71	55	77	62	67	59	89	69	53	68	67
CNN2	694	776	528	752	800	711	623	722	616	649	635	892
ABCA7	42	7	8	8	7	28	34	35	17	38	46	20
SNCAIP	7	5	12	6	4	2	2	3	2	4	1	2
DDX20	342	327	377	296	304	320	326	289	270	296	291	99
BTBD1	11	17	29	8	11	10	33	21	10	9	16	0
FAR2	30	24	29	20	28	29	34	23	23	27	32	13
BCAS1	32	29	31	34	17	23	30	30	21	22	21	14
SBNO2	1879	2625	2423	2324	2079	1259	1599	848	1260	1970	2270	2012
PMS1	51	90	49	52	58	44	59	57	23	29	23	23
HMG20B	3200	3540	3161	3221	3372	3305	2958	3431	3373	3196	3348	4625
CALCRL	4	5	6	4	5	2	14	6	1	3	10	1
TAF11	17	11	9	32	13	8	14	30	9	22	5	9
ANKS1A	1141	1148	1215	960	1106	1137	1076	1072	1041	932	990	858
AP3D1	2603	2824	2506	2499	2649	2630	1781	2622	2177	2083	2218	2438
ZNF76	852	936	855	841	959	869	821	843	850	870	848	1028
SLC9A3R2	1302	1569	1307	1407	1820	1588	1130	1616	1507	1410	1469	2137
NTHL1	307	325	311	346	321	328	264	366	355	323	319	513
UHRF1BP1	1668	1483	1451	1404	1162	1295	1567	1225	1196	1417	1111	601
IPO5	5228	4701	4929	4346	4133	5102	4507	4386	4490	4368	4052	2630
OAT	8	3	8	0	3	5	1	1	0	4	3	0
WDR3	2160	2069	2477	1524	1596	2204	1967	1675	1759	1466	1554	820
PKN2	820	722	1009	537	489	557	1012	580	374	643	718	93
WDR18	68	56	33	25	40	63	49	68	52	50	33	30
TRAM2	589	532	534	564	552	596	636	541	552	617	584	372
NTN1	24	17	15	22	24	19	17	19	16	19	22	21
GLP2R	11	15	16	19	19	24	19	13	16	10	17	10
MCM10	475	336	426	395	283	371	482	314	340	354	295	160
DGKA	84	94	83	89	96	67	80	81	75	80	81	95
ERBB3	546	507	548	445	412	299	530	512	370	362	423	454
ANKRD44	299	243	288	354	262	302	400	242	250	314	294	123
KARS1	775	664	603	694	771	752	551	709	762	617	646	733
ADAT1	630	602	624	561	551	632	578	540	529	561	515	327
PDIA5	881	924	850	992	1175	1155	806	1012	946	889	953	1013
TBC1D22B	364	323	307	379	360	366	383	347	386	354	334	302
NDUFB4	7883	7542	7214	7411	7115	6892	6699	7621	7085	6965	6839	8834
SPEN	1417	1341	1266	1240	1301	1295	1272	1231	1245	1215	1170	696
MYLK	30	53	18	39	6	79	46	26	17	66	5	12
ZC3H15	777	742	856	507	528	678	944	474	437	567	733	165
MAP2K4	1456	1139	1445	1449	1245	1666	1677	1020	1095	1435	1244	413
PACC1	233	135	180	171	184	232	198	168	141	221	196	81
SNAP91	33	27	23	28	29	30	36	23	17	30	29	7
SLK	691	535	958	530	460	494	998	412	266	508	700	63
CYB5R4	181	132	206	135	131	173	240	135	107	183	190	36
COL17A1	5	7	0	2	3	3	4	1	5	2	0	3
GSTO2	73	87	63	71	62	70	74	80	69	70	85	109
SEC61A2	234	179	200	186	197	187	205	204	187	193	205	155
TLE2	419	502	379	404	501	388	355	475	477	382	516	718
ASB1	1008	927	918	936	985	997	997	997	952	875	904	759
FAM107B	580	455	550	604	622	707	760	517	474	667	678	175
ME1	1816	1731	1948	1516	1447	1641	1825	1542	1400	1524	1586	666
TBC1D1	1522	1363	1238	2576	2676	2719	1768	1936	1840	2128	2041	1595
CDK13	1165	1048	1193	911	855	1017	1144	879	815	928	963	386
MTHFD2	3933	3365	3917	3330	2847	3808	3784	3120	3542	3524	3529	1753
SLC9A7	982	964	846	715	628	664	915	697	687	696	782	388
FOXJ2	1110	989	885	1063	920	885	912	911	934	935	849	846
YBX1	26124	25264	24195	26028	24869	27480	22649	24154	26892	24473	21524	26166
PDE4A	24	21	20	21	25	17	18	19	28	15	26	17
PPP2R5A	964	816	995	789	631	832	1066	689	646	849	863	221
CTNNA2	4	5	7	26	13	21	13	4	7	12	10	2
ELAVL1	3465	3794	3350	3443	3719	3860	3035	3647	3728	3147	3212	3348
DIP2B	1812	1304	1564	1464	1219	1432	1691	1174	1207	1490	1209	460
SMARCD1	743	695	627	686	651	664	708	661	717	583	682	722
KDM4A	2939	2800	2770	2617	2467	2593	2611	2533	2572	2580	2532	2109
NFYC	1133	1235	1129	1064	1101	1129	938	1147	1141	1056	1022	1261
ZMYND12	226	206	224	175	186	204	202	237	248	217	222	201
SLC9A3	1431	1683	1578	1379	1430	1357	1437	1540	1341	1297	1378	1076
NGEF	378	444	370	352	386	345	348	372	367	376	402	369
ASPM	108	82	162	67	60	80	179	56	25	85	71	20
ELOVL1	3152	2989	2729	3085	3293	3089	2563	3057	3099	2665	2543	3613
SPI1	0	0	5	0	0	0	6	0	0	0	9	0
ZNRD1	129	157	169	173	155	170	149	178	167	152	130	190
ZBTB11	9	11	8	15	3	16	20	8	13	14	12	19
ATXN3	146	94	140	74	79	136	170	70	90	84	86	36
GOLGA5	1104	1021	1239	921	902	1074	1126	887	817	1073	1042	302
FGFR2	6	12	13	28	19	21	25	5	3	8	7	17
LRRC40	171	191	284	110	154	148	306	148	87	143	255	28
ISOC1	758	787	719	654	641	762	728	756	704	686	755	339
EML1	252	208	345	215	290	214	308	257	393	22	217	246
TRMT11	87	85	90	70	70	96	119	59	43	62	100	23
THUMPD1	1233	1065	1375	1143	1098	1512	1582	1009	884	1148	1230	227
MSANTD3	314	269	300	316	264	341	380	235	268	327	277	140
KIF26A	16	11	11	14	11	9	10	11	8	7	8	17
ATG2B	950	829	995	693	639	807	1102	632	604	751	767	176
ARFGEF1	1334	1154	1588	1000	894	1179	1611	970	833	1024	1187	208
ZFAT	410	373	335	350	374	345	296	376	366	365	309	360
MTFR1	1711	1510	1643	1344	1194	1577	1579	1243	1244	1393	1300	418
STAG3	50	47	46	41	31	36	62	45	28	27	39	40
FECH	4495	3811	4258	4253	4409	4677	4370	4073	4082	3978	4263	2510
MYO9A	413	368	445	334	280	361	529	299	243	365	413	61
DDX3Y	814	769	1075	656	613	831	1125	592	567	663	831	128
PFKP	2733	2662	2522	2889	2537	2766	2347	2734	2768	2633	2410	3896
IDI1	1347	1128	1420	1127	1112	1249	1516	1066	926	1159	1401	298
SP100	212	177	211	207	152	211	238	165	164	199	197	74
KLF6	285	227	251	419	342	473	449	249	270	407	285	117
PLPP1	3944	3299	3646	8081	9290	10075	5574	5586	6314	5912	6410	5807
NEO1	1638	1639	1458	1759	1817	1749	1560	1691	1674	1746	1734	1251
TRAM1	2697	2662	2825	2145	2386	2547	2988	2289	1772	2390	2822	763
PHKA1	770	832	826	743	757	808	782	710	654	666	739	467
TNFRSF1A	74	52	49	67	58	118	58	64	86	79	40	33
CACNB1	64	78	72	76	51	47	56	52	50	59	57	54
EVI5	215	198	257	186	150	137	326	170	112	176	213	30
STOML1	491	569	479	523	521	493	378	603	539	525	472	741
PKM	32915	33684	29601	34564	33634	32491	25843	35093	33814	30903	28667	52534
DHX29	822	784	1036	547	518	681	924	565	463	614	740	99
DNTTIP2	609	570	848	405	483	596	787	422	374	458	592	131
METTL22	309	328	313	299	312	281	278	330	333	347	299	457
TP53BP1	768	895	941	617	763	856	680	820	697	683	814	289
TRO	5	2	7	4	7	6	9	7	8	5	8	11
RRP15	442	392	506	448	426	449	572	375	420	445	458	223
RHOA	13219	13195	11660	13335	13831	13898	11340	14083	14111	12788	11880	17595
DHX8	306	408	467	355	344	480	242	410	375	343	351	465
PMS2P4	141	122	108	81	96	109	117	101	108	90	87	117
PRKCZ	1410	1610	1401	1410	1616	1457	1133	1611	1443	1324	1442	1873
ZFY	393	399	442	233	227	210	453	224	145	258	379	50
IARS2	4458	3887	4833	3614	3246	4174	4584	3501	3521	3771	3743	1473
SYT1	2	4	4	1	2	5	7	3	1	3	2	1
NAV3	180	95	99	148	64	106	207	78	108	146	77	37
IDH3G	1649	1890	1502	1710	1889	1728	1416	1996	1862	1647	1619	2685
ROGDI	1212	892	887	1189	762	1142	1005	1159	917	1029	1064	1835
PDZD4	170	184	160	181	218	131	148	203	169	200	194	289
ROCK1	784	658	910	504	436	479	961	438	289	563	690	84
CBFB	783	681	812	719	572	758	1014	553	597	693	753	168
PDK3	328	340	312	326	257	291	433	245	254	298	363	140
HYAL2	1415	1766	1413	1346	1658	1506	1074	1633	1377	1194	1379	1881
HDAC4	268	236	86	233	63	157	186	231	220	155	138	117
RASSF1	520	585	511	569	562	579	549	560	559	525	514	410
FGFR3	5	25	20	2	15	0	0	5	11	22	24	9
IFI35	154	137	118	140	115	113	173	155	135	146	142	199
HEATR6	1	9	14	21	6	10	19	6	12	13	9	1
COASY	1868	1976	1681	1821	1873	1880	1496	1866	1815	1750	1696	2454
PLEKHH3	1890	2152	1774	1834	1932	1622	1603	1839	1733	1958	1990	2234
MEF2A	747	652	777	660	523	657	832	595	445	724	707	121
OTUD5	1781	1886	1691	1715	1842	1806	1413	1847	1747	1571	1643	1985
TFE3	1987	2054	1803	1872	2028	1852	1631	1947	1882	1860	1764	2153
TBC1D25	590	578	516	589	621	586	484	604	541	538	566	783
ACSL4	75	58	101	57	43	54	94	56	33	65	71	16
INPP5A	1167	1214	1177	979	988	969	1000	1047	1020	996	1025	795
GPKOW	597	630	539	537	590	592	463	568	520	545	537	590
GRIPAP1	707	729	697	707	729	701	758	592	649	642	651	460
FTSJ1	933	1003	983	901	1006	1023	887	1022	973	869	916	1145
PRR11	381	286	321	336	275	310	321	262	293	281	212	163
REEP1	105	82	88	90	68	73	90	79	60	83	70	30
ATP11A	817	785	822	680	758	695	811	765	638	755	749	325
POLR1A	2294	2453	2179	2090	2271	2318	1851	2288	2543	1861	1849	2102
LAPTM4A	3419	3414	3394	3033	3225	3501	3322	3152	2790	3025	3177	1946
TTC7A	187	171	157	192	189	164	167	175	141	191	194	203
IP6K2	3012	3242	2951	2972	3077	2911	2879	2906	2618	2750	2805	2312
SRBD1	255	258	355	192	215	259	295	233	186	234	250	65
KIF2A	87	92	134	54	79	110	164	71	65	97	47	52
PSME4	2577	2143	2430	2079	1787	2374	2709	1979	1956	2091	1928	604
IFT80	132	174	227	100	105	100	258	106	67	117	194	19
SIRT2	2025	2300	1854	2034	2188	1970	1692	2210	2070	1940	1982	2968
ERLEC1	594	592	718	503	522	561	704	475	409	555	655	188
PPP2R5B	601	702	623	631	814	650	511	693	567	597	716	842
PYGM	2	4	4	1	7	7	6	3	3	5	5	4
PAGE1	41	35	38	33	22	45	36	43	45	21	26	28
[truncated: 14,953 more rows]
