# Supplementary material for: Development of an Androgen Receptor Inhibitor Targeting the N-Terminal Domain of Androgen Receptor for Treatment of Castration Resistant Prostate Cancer
Source: Cancers (Basel). 2021 Jul 12;13(14):3488. doi: 10.3390/cancers13143488 (PMC8304761; doi:10.3390/cancers13143488)
Supplement: Supplementary file 1 [file cancers-13-03488-s001.zip › Ban_Supplementary Table2_RIME.xlsx]

## Sheet: table
Comparison:	DHTvsEtOH	DHTvsEnza	DHTvs220010		Criteria	Meaning
Number of Genes:	111	52	67		IgG=0 in both replicates	specific
Matches to known AR interactors or published endogenous AR RIME:	20	11	13		Fold Change > 1 in both replicates	higher in DHT in both replicates (disrupted with drug treatment)
Match Ratio (%):	18.018	21.1538	19.403
	AR	AR	AR
	AES	AES	AES
	ARID1A	FOXA1	CHD4
	ARID1B	NCOR2	FOXA1		Red	Proteins are known AR interactors
	CHD4	PIAS2	PIAS2		Red	Highlighted proteins are unique to drug
	FOXA1	RBM4	RNPS1
	NCOR2	RNPS1	SMARCA2
	PIAS2	SMARCD1	SMARCC1
	RBM4	SMARCD2	SMARCC2
	RNPS1	SUMO2	SMARCD1
	SMARCA2	TLE3	SMARCD2
	SMARCA4	ZMIZ1	SUMO2
	SMARCC1	HINT1	TLE3
	SMARCC2	TRIM33	ZMIZ1
	SMARCD1	HN1L	CTBP2
	SMARCD2	NUP133	ANP32E
	SMARCE1	EHF	SF3A1
	SUMO2	DSTN	MBNL1
	TLE3	OTUB1	OSTF1
	TRIM24	SELENBP1	FAM50A
	ZMIZ1	SEC23IP	ARPC4-TTLL3
	HMGB2	U2SURP	RXRB
	NKX3-1	NCOA5	KARS
	CTBP2	SF3A1	ATP2A2
	RPS26	NFIC	NUP133
	ARPC4-TTLL3	G3BP1	ZFR
	ATP2A2	CDK4	EHF
	SMARCB1	TBL3	OTUB1
	EHF	PRPF31	HDAC2
	GRHL2	LUC7L3	U2AF1
	MCM4	RXRB	SEC23IP
	OGT	OSTF1	NAPA
	LUC7L3	NPLOC4	U2SURP
	MARS	RPP30	NCOA5
	SELENBP1	RAI1	DDX41
	PSMA1	NKX3-1	SF3A3
	YWHAZ	PDHB	NOL6
	OSTF1	ZMYM4	NFIC
	G3BP1	MBNL1	AIP
	HN1L	ARPC4-TTLL3	STT3A
	PDS5A	DDX41	G3BP1
	SET	DPF2	TBL3
	NUP133	GRHL2	RAI1
	PPIL4	ADNP	PRPF31
	CHAMP1	TCF20	LUC7L3
	OTUB1	KARS	WDR3
	HDAC2	ZFR	MTAP
	LRPPRC	NOSIP	NPLOC4
	WDR3	PDS5B	RPP30
	NPLOC4	SERBP1	NKX3-1
	NAPA	MTAP	PDHB
	RNPEP	WDR3	DPF2
	CPNE1	MRTO4	NOSIP
	U2SURP		HINT1
	NCOA5		ZMYM4
	SNW1		DSTN
	DDX41		ACTL6A
	SF3A1		ADNP
	SF3A3		PDS5B
	ANP32E		RPS26
	TBX3		GLRX3
	SEC22B		CHAMP1
	BROX		CPNE1
	HMG20B		WDR5
	TBL3		SET
	PRPF31		SELENBP1
	RXRB		PDCD5
	CDK4		SMARCB1
	MTAP
	RPP30
	U2AF1
	MRTO4
	NOL6
	PSMA3
	RAI1
	TCF20
	MBNL1
	TRIM33
	DPF2
	WDR5
	ADNP
	ZMYM4
	RBM8A
	NOSIP
	ACTL6A
	RECQL
	PDHB
	GSE1
	DPF1
	PDCD5
	DCAF7
	SERBP1
	SHMT2
	PDCD4
	PBRM1
	GLRX3
	ZFR
	TSEN34
	DSTN
	NFIC
	FAM50A
	KARS
	SEC23IP
	STT3A
	HINT1
	RPLP2
	CTBP1
	PDS5B
	KDM6A
	U2AF2
	NAMPT
	AIP

## Sheet: LFQ_DHTvsETOH
Gene	DHT_2	DHT_3	EtOH_2	EtOH_3	FC_2	FC_3	AVG(FC)	BothAbv1?	enza_2	enza_3	13789_2	13789_3	14449_2	14449_3	17005_2	17005_3	220010_2	220010_3
SUMO2	37562000	22535000	0	0	37562001	22535001	30048501	TRUE	9340000	0	11835000	17952000	12439000	0	0	0	15569000	0
HMGB2	21359000	18903000	0	0	21359001	18903001	20131001	TRUE	28477000	17707000	18122000	21833000	23871000	20600000	0	18490000	26715000	21489000
NKX3-1	20347000	24852000	2366300	0	8.59865	24852001	1.2426e+07	TRUE	7290200	7997900	15546000	17359000	4646200	10909000	9353700	11218000	10147000	8259000
CTBP2	13587000	15152000	8317400	0	1.63356	15152001	7.576e+06	TRUE	13780000	9065100	13232000	18281000	12941000	15128000	13366000	17195000	11787000	0
RPS26	9323000	5776900	0	0	9323001	5776901	7549951	TRUE	6570600	7158900	0	7009700	10928000	5976400	0	8214000	7152400	5208100
SMARCA2	7358400	6864000	0	0	7358401	6864001	7111201	TRUE	9824800	5764000	10360000	7603600	6609300	6708000	6822800	7195700	7115400	0
ARPC4-TTLL3	7453000	6498000	0	0	7453001	6498001	6975501	TRUE	3680800	6432000	4281400	0	4152800	3782400	5848600	4799400	5359500	0
ATP2A2	7132200	5970700	0	0	7132201	5970701	6551451	TRUE	7449000	7627600	7611500	6487600	9434800	9461800	4938300	8276200	5531700	0
SMARCB1	19362000	12878000	14109000	0	1.37232	12878001	6.439e+06	TRUE	30867000	0	38080000	16346000	24441000	27332000	14752000	10972000	17615000	12471000
EHF	5983500	5729100	0	0	5983501	5729101	5856301	TRUE	5094000	0	8301300	6073800	3877200	5880800	4797500	4994900	3581700	0
GRHL2	4790000	5763100	0	0	4790001	5763101	5276551	TRUE	3752700	3756400	12472000	0	6058400	6079600	6614900	3735200	5985200	0
MCM4	5527000	4823900	0	0	5527001	4823901	5175451	TRUE	6639900	5816100	9892600	5595000	12953000	6869100	5761400	5287000	6218900	5236100
OGT	8670800	9313900	7471600	0	1.1605	9313901	4.65695e+06	TRUE	13879000	0	14408000	0	13280000	13159000	11776000	7772700	14258000	0
LUC7L3	5878900	2803400	0	0	5878901	2803401	4341151	TRUE	3181600	0	4105500	0	0	3485400	5463900	2856400	2762500	0
MARS	11953000	8045100	10174000	0	1.17486	8045101	4.02255e+06	TRUE	11799000	10918000	10483000	0	12642000	9452800	8765200	7990000	9810500	11890000
SELENBP1	7908400	4977300	0	4107200	7908401	1.21185	3.9542e+06	TRUE	6656600	0	5576700	4136500	5563500	5159000	7715200	6083500	6301900	4831400
PSMA1	3801000	4062800	0	0	3801001	4062801	3931901	TRUE	5923000	4094600	6048700	0	4656400	4411100	4882900	5090600	5808500	0
YWHAZ	12923000	7733100	10533000	0	1.22691	7733101	3.86655e+06	TRUE	10943000	11384000	7967400	0	7609200	11151000	11075000	12730000	10380000	7988900
OSTF1	4875500	2673300	0	0	4875501	2673301	3774401	TRUE	3940800	0	3733500	0	0	3985100	0	0	0	0
G3BP1	3257100	3445500	0	0	3257101	3445501	3351301	TRUE	3249800	0	2112200	0	2202000	3122100	0	3576200	2860100	0
HN1L	3242300	3442100	0	0	3242301	3442101	3342201	TRUE	0	0	0	0	0	2409700	5001900	0	3307000	0
PDS5A	3793300	2797000	0	0	3793301	2797001	3295151	TRUE	4658200	0	4388500	2600700	3226100	4614100	3535900	4044600	5339000	0
SET	10035000	6560500	9281000	0	1.08124	6560501	3.28025e+06	TRUE	14338000	0	11248000	6484900	8256000	9126000	9505000	9276200	7967200	6234000
NUP133	6186300	5956700	0	5527400	6186301	1.07767	3.09315e+06	TRUE	5245700	0	7380300	0	7942000	8977400	6452100	0	4566000	0
PPIL4	5754600	5753200	4780700	0	1.20371	5753201	2.8766e+06	TRUE	6435000	0	5953300	0	5415600	6251200	6217600	4475800	6328000	4998100
CHAMP1	7669900	5591700	6290900	0	1.21921	5591701	2.79585e+06	TRUE	7829100	0	10862000	7674800	5791700	8034700	6874900	6009300	6491200	4690500
OTUB1	6055300	5569000	5756200	0	1.05196	5569001	2.7845e+06	TRUE	5497600	0	4473500	0	5276700	4746300	5729800	0	6054500	0
HDAC2	6238900	5438900	5401900	0	1.15495	5438901	2.71945e+06	TRUE	6323000	5011600	8021800	0	5936600	5924700	5417900	5356200	5107900	0
LRPPRC	4015000	5206200	3431700	0	1.16997	5206201	2.6031e+06	TRUE	7896000	4848200	8926400	4622300	8668500	4495200	5837500	6785000	4747200	4869400
WDR3	2584800	2589500	0	0	2584801	2589501	2587151	TRUE	2226200	2323700	2056300	1641500	2158700	2254500	0	2689100	2418000	0
PIAS2	3561700	4935300	1611600	0	2.21004	4935301	2.46765e+06	TRUE	0	2202200	4989000	2949100	2173700	3193000	0	2612200	2689800	0
NPLOC4	2581400	2197200	0	0	2581401	2197201	2389301	TRUE	2009900	0	2316600	0	0	0	2348300	0	1957000	0
RNPS1	7265400	4680200	7042900	0	1.03159	4680201	2.3401e+06	TRUE	5128600	0	4270000	0	6305300	4547300	4100100	4085900	5993900	0
NAPA	8770700	4624200	4642000	0	1.88942	4624201	2.3121e+06	TRUE	8972300	4235200	7570300	7700200	6808000	6934700	5583600	5854000	4484000	0
RNPEP	2152300	2460200	0	0	2152301	2460201	2306251	TRUE	3540700	0	2540900	0	2426100	2099400	3843700	2011500	2582100	2675900
CPNE1	4138800	4403200	3942700	0	1.04974	4403201	2.2016e+06	TRUE	4809100	5672100	5229000	4737500	5254900	5622300	5542400	5687500	3902800	3377800
U2SURP	7062900	4255100	5964400	0	1.18418	4255101	2.12755e+06	TRUE	5264900	0	6034500	0	5909200	5499300	0	0	6412100	0
NCOA5	5997300	4244500	3965300	0	1.51245	4244501	2.12225e+06	TRUE	4411800	0	5026600	0	3422100	0	4741000	4525800	4493200	0
SNW1	9846800	4127800	5577600	0	1.76542	4127801	2.0639e+06	TRUE	7791800	5893500	7750700	4291100	7199200	7448200	5916900	5625200	8814000	4356600
DDX41	4809300	3951800	4245400	0	1.13283	3951801	1.9759e+06	TRUE	3729400	2436000	3305900	0	4183700	3803500	4859600	5682500	3293900	0
SF3A1	5546500	3901000	5453600	0	1.01703	3901001	1.9505e+06	TRUE	5379500	0	6066200	0	6556300	5784400	4847100	6109900	0	0
SF3A3	5577000	3797200	5198200	0	1.07287	3797201	1.8986e+06	TRUE	6679700	3209800	8063200	3378600	5793600	6005300	4608500	5703500	4213100	0
ANP32E	6198200	3780200	4217500	0	1.46964	3780201	1.8901e+06	TRUE	10731000	0	11297000	5650600	6320100	5397500	5985100	5356700	0	0
TBX3	1913400	1808600	0	0	1913401	1808601	1861001	TRUE	2053800	1549000	2273000	1911200	2155200	2362200	2048700	0	2340900	0
SEC22B	1615700	1895400	0	0	1615701	1895401	1755551	TRUE	1678400	1684500	1617400	1683200	2281700	0	1479400	2301200	1680300	1581100
BROX	4567500	3402800	4233200	0	1.07897	3402801	1.7014e+06	TRUE	6063800	3947000	5033800	3682700	5461300	3647900	5088300	5255100	4818500	0
HMG20B	3407300	3063100	3109400	0	1.09581	3063101	1.53155e+06	TRUE	5859000	2227700	6458200	3266000	5065800	3591200	2222400	2202700	5497100	2057500
TBL3	3744500	2866900	2895100	0	1.29339	2866901	1.43345e+06	TRUE	3150100	0	2777500	0	3209200	3556400	0	3256000	3069500	0
PRPF31	3408400	2823200	2916300	0	1.16874	2823201	1.4116e+06	TRUE	3402900	0	3108800	2731000	3838000	4241700	2045300	0	2457300	0
RXRB	3611000	2770400	2937200	0	1.2294	2770401	1.3852e+06	TRUE	3113400	0	4009700	0	2957100	4749300	3469500	0	0	0
CDK4	2658200	3156200	0	2401500	2658201	1.31426	1.3291e+06	TRUE	2523300	0	2877100	3687700	2564000	2668000	2692300	2707900	3415700	0
MTAP	4181400	2429200	3531400	0	1.18406	2429201	1.2146e+06	TRUE	3578300	2131100	3449900	2863000	4071100	3379100	2834400	0	3586700	0
RPP30	2936200	2132300	2418700	0	1.21396	2132301	1.06615e+06	TRUE	2296400	0	0	3196100	1843100	2025500	2335200	0	2191900	0
U2AF1	2884300	2023900	2537900	0	1.13649	2023901	1.01195e+06	TRUE	2011000	2104900	2000900	1785400	1751000	1875700	2186900	0	0	0
MRTO4	1942900	1856600	1849000	0	1.05078	1856601	928301	TRUE	1699600	1774600	1808900	0	2246000	1609800	1916900	1750900	1793400	1910500
NOL6	1773800	1953500	0	1852600	1773801	1.05446	886901	TRUE	1472600	2131000	0	0	1944600	2063000	0	0	0	0
PSMA3	763370	705470	0	0	763371	705471	734421	TRUE	955860	799480	712010	868730	718420	727950	834050	0	833890	690120
RAI1	1442700	1382400	1352200	0	1.06693	1382401	691201	TRUE	1038200	0	1466700	1654500	0	0	0	0	0	0
FOXA1	100290000	99082000	42975000	18665000	2.33368	5.30844	3.82106	TRUE	64373000	79007000	117620000	103250000	68501000	92628000	42049000	60547000	88195000	35305000
SMARCD1	28148000	31342000	6780400	9243900	4.15138	3.39056	3.77097	TRUE	18888000	19224000	24196000	22533000	19064000	24978000	21349000	22501000	26201000	13681000
TLE3	119810000	90546000	53687000	28371000	2.23164	3.1915	2.71157	TRUE	73929000	53599000	119180000	102250000	67563000	98581000	89282000	81336000	83567000	38468000
AES	10169000	6745100	4153900	2598400	2.44806	2.59587	2.52196	TRUE	6241400	3755100	9246100	10036000	4801400	8226500	6501000	5842100	6863700	4608500
ARID1A	77722000	73699000	45666000	24494000	1.70197	3.00886	2.35541	TRUE	85800000	41995000	90296000	68653000	69543000	84207000	70761000	51239000	88549000	41407000
TCF20	5166500	6050000	3118900	2086300	1.65651	2.89987	2.27819	TRUE	4915800	3913200	7318000	5646000	5114900	8169200	5739600	3750900	6717100	3154200
SMARCE1	100870000	86649000	56068000	32231000	1.79907	2.68837	2.24372	TRUE	106590000	72135000	149240000	74413000	89235000	117950000	95128000	88934000	115290000	65884000
AR	1172500000	1183500000	582220000	488740000	2.01384	2.42153	2.21769	TRUE	615310000	957190000	709260000	1115600000	622960000	1015600000	811680000	800450000	1064500000	754520000
SMARCD2	266260000	222010000	117180000	106530000	2.27223	2.08401	2.17812	TRUE	194700000	169180000	262100000	255280000	215950000	299750000	201050000	210190000	244410000	147140000
SMARCC1	47719000	24654000	28993000	9975400	1.64588	2.47148	2.05868	TRUE	72593000	17965000	77583000	29087000	51644000	51756000	35813000	34717000	41570000	18391000
MBNL1	4376300	7839700	3108400	2932700	1.40789	2.6732	2.04055	TRUE	3121600	3371800	2720300	5405800	0	3513500	3697200	0	3784800	0
ZMIZ1	3580700	4078500	2048700	1885400	1.74779	2.1632	1.9555	TRUE	2156900	1901300	3512100	2611100	3048900	3292900	2252500	2083400	2906800	2315300
TRIM33	10380000	12340000	5583600	6116700	1.85902	2.01743	1.93822	TRUE	8435900	0	12255000	15260000	9510800	19056000	8233000	8878000	12929000	9677200
DPF2	90686000	61681000	43794000	36375000	2.07074	1.6957	1.88322	TRUE	81347000	34765000	111230000	72483000	76537000	92938000	50711000	72238000	72231000	28839000
NCOR2	14179000	11443000	10210000	4953100	1.38874	2.31027	1.8495	TRUE	12341000	5923500	16922000	12435000	10299000	16003000	9709200	7340500	14216000	5954500
WDR5	5772300	3990000	2395100	3191600	2.41004	1.25016	1.8301	TRUE	4069700	4167100	5844400	0	4152000	4509500	6102500	5105000	4807300	3502300
ARID1B	16336000	12299000	12291000	5486000	1.3291	2.24189	1.7855	TRUE	23563000	8276400	28462000	24552000	16630000	17703000	17868000	13503000	20935000	4091600
ADNP	17338000	16408000	9597100	10395000	1.80659	1.57845	1.69252	TRUE	10858000	13919000	15091000	17214000	11257000	18608000	12542000	11681000	14156000	13026000
ZMYM4	37900000	32900000	20217000	21851000	1.87466	1.50565	1.69016	TRUE	13598000	29500000	16904000	25258000	12851000	23208000	15965000	23891000	21659000	26915000
SMARCA4	56576000	52840000	49830000	24199000	1.13538	2.18356	1.65947	TRUE	97457000	43717000	97112000	80609000	60887000	76917000	63801000	46009000	82292000	39930000
RBM8A	9000300	9072900	6729300	4595600	1.33748	1.97426	1.65587	TRUE	7348600	10477000	6378000	4703400	4748000	6377800	15504000	4136900	10556000	7006000
NOSIP	12039000	9826700	6820100	6532700	1.76522	1.50423	1.63473	TRUE	9117900	8990500	10093000	7016900	8141900	11007000	7517200	8525700	7881300	5598000
SMARCC2	113870000	61310000	72396000	36937000	1.57288	1.65985	1.61637	TRUE	132740000	53478000	165760000	105450000	119370000	119980000	108870000	92531000	103100000	46222000
CHD4	11741000	4017000	5393400	3819300	2.17692	1.05176	1.61434	TRUE	7453600	4220300	8700200	4893700	8539000	6305700	5010600	4584500	6842600	0
ACTL6A	40369000	29019000	34479000	15795000	1.17083	1.83723	1.50403	TRUE	46510000	22387000	61241000	28397000	43624000	51301000	42496000	36204000	39593000	19759000
RECQL	5328300	5745300	4822500	3075500	1.10488	1.86809	1.48648	TRUE	12783000	5198000	7504000	5710100	5673400	7312700	6651300	4949500	8006200	4711900
PDHB	19935000	21751000	17397000	11985000	1.14589	1.81485	1.48037	TRUE	10940000	6809000	19113000	6319700	17258000	9289200	8964000	12653000	10087000	9063700
GSE1	5898900	4467000	3684400	3527300	1.60105	1.26641	1.43373	TRUE	7021900	3176200	10190000	3608400	7505300	7789500	6522400	4361100	7023900	2861700
DPF1	3603100	4151300	2884200	2622100	1.24925	1.5832	1.41623	TRUE	3766900	0	6707400	4673100	3627100	7133100	3547800	3704200	4548300	0
PDCD5	4687100	4151900	3097200	3271700	1.51333	1.26903	1.39118	TRUE	4047700	4323700	4560000	0	4220100	4359200	4259300	0	4552200	3758400
DCAF7	11167000	9662400	9123700	6240200	1.22396	1.54841	1.38618	TRUE	11693000	7806200	16646000	13277000	12054000	16682000	16204000	7199200	20181000	9564400
SERBP1	3325600	3338600	3244000	2022100	1.02515	1.65106	1.3381	TRUE	2742000	3011000	2795600	2535800	4447600	3293800	2571700	2036800	3350600	0
SHMT2	4167700	4641700	2879700	3805200	1.44727	1.21983	1.33355	TRUE	10751000	4118800	10170000	0	7609900	4888800	9969900	11785000	6266700	4990300
PDCD4	4136500	3053800	3503100	2175500	1.18081	1.40372	1.29227	TRUE	5366000	3202900	5515000	2987300	4106700	3282400	3452200	4638800	4468400	2652200
PBRM1	2888000	2623200	2525000	1864500	1.14376	1.40692	1.27534	TRUE	3880600	2913600	4053100	2544500	4035200	3774200	3603500	3468200	3298600	0
GLRX3	6597900	4382800	5621100	3259300	1.17377	1.34471	1.25924	TRUE	6931800	4137400	7447000	6351000	6950900	6544500	6595400	7104100	6575200	3148700
ZFR	7494400	5806800	5802700	4821400	1.29154	1.20438	1.24796	TRUE	5526800	5047300	7725500	7362000	6560500	6342800	7456200	5229900	7329500	0
TSEN34	4266600	3059800	3063900	2792200	1.39254	1.09584	1.24419	TRUE	5283600	2624700	6599400	3578200	5542100	5314500	3697500	3528300	4530400	0
DSTN	5720500	5600200	4338700	4851300	1.31848	1.15437	1.23643	TRUE	5037200	0	4529000	4954300	4621500	4720900	4802300	8602400	4516900	4064500
NFIC	4957300	3643100	3824800	3258900	1.29609	1.11789	1.20699	TRUE	3936400	0	4925200	5024400	3548400	0	4300500	4002700	4594000	0
FAM50A	8956100	6560400	7657200	5416400	1.16963	1.21121	1.19042	TRUE	9273000	2461900	10337000	0	8298600	9807400	7072100	0	8520100	0
RBM4	19728000	15625000	18448000	12584000	1.06938	1.24166	1.15552	TRUE	17878000	13282000	21480000	21784000	16071000	17697000	18694000	19326000	22275000	10928000
KARS	5569400	6030700	4780800	5285400	1.16495	1.14101	1.15298	TRUE	4233600	4758000	3974700	0	4686100	4521600	5140400	6214800	3737900	0
SEC23IP	5231900	4807200	4115000	4782100	1.27142	1.00525	1.13834	TRUE	4419700	0	5707800	0	6463800	4218900	4541600	4142700	4106700	0
STT3A	3114900	3511000	2499900	3423500	1.24601	1.02556	1.13578	TRUE	2871600	5310800	3164500	1707900	3293100	2774500	2394700	4167800	2405900	0
HINT1	18614000	14021000	14946000	13724000	1.24542	1.02164	1.13353	TRUE	18155000	0	28924000	11640000	23646000	31622000	24476000	21393000	13389000	8500200
TRIM24	7919400	6604800	6974600	5838800	1.13546	1.13119	1.13333	TRUE	9201200	6036200	8350000	9145600	6369000	11877000	6898200	8483300	8180900	4940300
RPLP2	11636000	8006200	11208000	6586800	1.03819	1.21549	1.12684	TRUE	15363000	10148000	17502000	6645800	19014000	11614000	14851000	19760000	13389000	0
CTBP1	16047000	13347000	13913000	12138000	1.15338	1.0996	1.12649	TRUE	20060000	12036000	19595000	9773800	15156000	15928000	18088000	15231000	17013000	11578000
PDS5B	5085300	5218600	4928000	4306000	1.03192	1.21194	1.12193	TRUE	4807200	4082600	5361500	0	3631900	5016100	1076300	3865400	3970900	4494400
KDM6A	4420600	3854200	3862200	3713100	1.14458	1.038	1.09129	TRUE	5514800	5340100	4715200	3605900	4622400	5659100	5342700	4369400	4496300	0
U2AF2	9032500	6518300	8493500	5858300	1.06346	1.11266	1.08806	TRUE	8611400	8312400	8158300	30879000	5265500	8965100	5529400	5903200	9827500	3565100
NAMPT	11172000	6376600	10350000	6013600	1.07942	1.06036	1.06989	TRUE	14338000	6939400	13342000	8192500	10861000	10563000	10386000	9302100	11235000	7027500
AIP	3609700	3277600	3567000	2911700	1.01197	1.12567	1.06882	TRUE	4465500	0	5577700	3766900	5329500	0	3863100	3615200	0	2680200
ACTA1	61465000	39246000	0	88826000	61465001	0.44183	3.07325e+07	FALSE	62252000	70701000	92950000	58260000	101530000	74764000	90864000	0	67902000	0
NUP107	48911000	0	0	90385000	48911001	1.10638e-08	2.44555e+07	FALSE	44441000	62961000	0	0	45807000	29543000	48873000	0	0	0
ILKAP	0	36030000	0	0	1	36030001	18015001	FALSE	33127000	0	34975000	49339000	31336000	0	33697000	0	34278000	0
PI4KA	0	29387000	0	0	1	29387001	14693501	FALSE	0	0	0	0	0	0	0	0	0	0
IDH3G	26960000	0	0	0	26960001	1	13480001	FALSE	0	0	0	0	0	0	0	0	0	0
UBB	25400000	15114000	0	18747000	25400001	0.806209	1.27e+07	FALSE	16064000	0	19201000	36939000	25161000	17698000	46995000	25432000	20247000	0
RPL26	0	18718000	0	0	1	18718001	9359001	FALSE	0	8874900	0	0	6519900	0	7006700	0	8320200	10759000
EEF1B2	0	12515000	0	0	1	12515001	6257501	FALSE	9628800	0	10483000	0	0	8014600	13060000	0	9228300	9594100
DAZAP1	12270000	0	0	9046600	12270001	1.10539e-07	6.135e+06	FALSE	9700900	0	9469600	0	11885000	11349000	10058000	7046900	11584000	0
BRIX1	10120000	0	0	10354000	10120001	9.6581e-08	5.06e+06	FALSE	6462900	0	11821000	0	9705400	7538600	12206000	10287000	0	6648900
SRP14	9672300	0	0	0	9672301	1	4836151	FALSE	6656800	0	7768600	12504000	11283000	10595000	7093400	9421900	7030400	0
ANXA7	6924500	9135700	9035100	0	0.7664	9135701	4.56785e+06	FALSE	10838000	7220700	6944500	10092000	6177100	7899200	8198800	6694000	10557000	0
PLAA	7353500	8267600	8512700	0	0.863827	8267601	4.1338e+06	FALSE	6964500	0	9661800	7424100	9842300	7543800	7608300	6708100	0	0
RUVBL2	0	7959300	8684100	0	1.15153e-07	7959301	3.97965e+06	FALSE	8671900	0	9749700	0	8893500	6655700	12077000	0	0	9596000
FBRS	7902500	0	0	0	7902501	1	3951251	FALSE	0	0	8533200	0	0	0	0	0	0	0
RPL29	7699200	0	0	0	7699201	1	3849601	FALSE	5441100	0	0	4726300	7085400	4681500	6239900	0	5705800	0
EIF3B	7452700	0	0	8209300	7452701	1.21813e-07	3.72635e+06	FALSE	7153500	0	0	0	6639600	0	6443600	9894200	0	5157400
PRRC2C	7240300	9177300	0	22487000	7240301	0.408116	3.62015e+06	FALSE	5079400	0	4877600	6840700	5011000	6253100	6101800	7521900	12953000	0
DNAJC8	0	7214700	0	0	1	7214701	3607351	FALSE	9438400	0	10169000	0	8673000	7922900	5743800	6479200	0	0
HNRNPA3	0	7153800	0	0	1	7153801	3576901	FALSE	0	0	0	0	0	0	0	0	0	0
TMPO	0	6537000	6052100	0	1.65232e-07	6537001	3.2685e+06	FALSE	4930000	6051200	0	0	10395000	5841900	7253000	5639300	5837300	0
KRT77	0	6465100	0	0	1	6465101	3232551	FALSE	2495600	0	0	0	0	0	0	3119000	0	0
CMBL	7715700	6396000	9492700	0	0.812804	6396001	3.198e+06	FALSE	8048400	4938000	7135100	5176900	7104800	5806500	4368000	4947800	6059100	3088300
RBM15	6295300	0	0	6235400	6295301	1.60375e-07	3.14765e+06	FALSE	4584900	8112500	5223900	0	5619600	0	5548600	4613400	5328900	5905800
CBX1	5950500	0	0	0	5950501	1	2975251	FALSE	6888900	0	6894400	6204100	5820700	5776100	0	4770600	6276100	0
COPS6	6135200	5765300	7519200	0	0.815938	5765301	2.88265e+06	FALSE	7733800	0	9051900	0	6927600	0	7860700	0	0	0
SRRT	3008900	5642400	5571000	0	0.540101	5642401	2.8212e+06	FALSE	5832300	3656900	5252900	7143400	4592300	5201600	4584200	3717100	6406500	3501200
SF1	10708000	5564000	11225000	0	0.953942	5564001	2.782e+06	FALSE	9638300	6710300	12611000	8037300	7078100	10022000	7206100	6447100	10449000	4951900
COPE	0	5455000	0	0	1	5455001	2727501	FALSE	4528200	0	0	0	0	0	16827000	0	0	0
NAT10	5381800	0	0	0	5381801	1	2690901	FALSE	4594100	0	4346500	0	4481200	0	4194500	5506500	4060700	0
PPIB	0	5239300	0	0	1	5239301	2619651	FALSE	0	0	0	0	0	0	0	0	0	0
CSTF3	0	5191500	5158700	0	1.93847e-07	5191501	2.59575e+06	FALSE	5372800	0	8393800	6767400	6512500	6596400	5408700	4579800	5616300	0
DLST	0	5004400	0	0	1	5004401	2502201	FALSE	4969900	0	3600800	4864400	3670900	5054600	4734800	5333200	5977100	5720600
CTNNB1	3726600	4911600	4250400	0	0.876765	4911601	2.4558e+06	FALSE	4832600	0	3880500	3113000	4839500	3421900	5406900	4700700	4322900	4512000
RAB6B	0	4798700	0	0	1	4798701	2399351	FALSE	0	0	0	0	2705200	3778300	0	0	0	0
PRPF40A	0	4779300	0	0	1	4779301	2389651	FALSE	9439400	0	8089500	0	7791100	8641800	6682900	0	6772900	6749300
HSPB11	4660600	0	0	0	4660601	1	2330301	FALSE	7079500	0	4042000	4745700	5866300	3420100	0	0	4380500	0
SAFB	4149700	4644000	6861600	0	0.604772	4644001	2.322e+06	FALSE	7004800	5408700	5474800	4874300	7106300	5886500	4567700	4247400	7324300	0
LPP	6276000	4570400	12070000	0	0.519967	4570401	2.2852e+06	FALSE	6088800	6583600	6643300	4185600	9931400	5952200	14262000	11424000	7800100	7068800
SRM	4513200	0	0	0	4513201	1	2256601	FALSE	4424200	0	4885100	0	3428900	0	3813400	4137900	3482200	0
TPI1	4515500	4475600	6519800	0	0.692583	4475601	2.2378e+06	FALSE	5447700	5463200	5642600	6356600	6839800	4022300	5833500	5501500	5253800	6030900
DUS3L	0	4438600	0	0	1	4438601	2219301	FALSE	4220400	0	5022600	0	3271900	2695800	3009400	3151500	3065300	0
IRF2BPL	0	4336200	0	0	1	4336201	2168101	FALSE	5565400	0	7168600	0	5407300	5381100	4364600	0	0	0
EXTL2	4307400	7189800	0	15463000	4307401	0.464968	2.1537e+06	FALSE	7679200	6741400	5274500	7372100	3498700	4741800	0	0	4460800	5702600
KIF5B	0	4175100	0	0	1	4175101	2087551	FALSE	4008800	0	0	0	0	0	0	0	0	0
NIFK	4142200	0	0	0	4142201	1	2071101	FALSE	0	0	0	0	0	0	0	0	0	0
NCLN	0	4063300	2503500	0	3.99441e-07	4063301	2.03165e+06	FALSE	2045000	0	1950200	0	3067800	2367500	0	0	2249800	0
ATRX	4035500	0	0	0	4035501	1	2017751	FALSE	0	0	5352400	0	4232700	0	0	5583500	0	0
VDAC3	3980900	0	0	0	3980901	1	1990451	FALSE	4045000	0	5833900	0	8076900	0	5034100	0	0	0
TRPS1	0	3840000	0	0	1	3840001	1920001	FALSE	0	4300600	4209900	0	3852500	4255900	3025500	0	6112400	4339500
SERPINB12	0	3793700	0	0	1	3793701	1896851	FALSE	2154600	0	0	0	0	0	0	0	0	2974900
USP5	3821500	3765300	7327100	0	0.521557	3765301	1.88265e+06	FALSE	7898100	0	7982000	7085000	9166100	7906200	6393700	0	5703100	0
DHRS7	0	3698000	0	0	1	3698001	1849001	FALSE	3407700	0	3403500	0	3880900	0	3458200	4330400	0	0
PFDN6	0	3647000	0	0	1	3647001	1823501	FALSE	3664600	0	0	0	0	0	0	0	0	0
EEF1E1	3611600	0	0	0	3611601	1	1805801	FALSE	2999500	0	0	0	4375300	0	3100600	4229500	0	0
EXOSC4	2850800	3506200	3000800	0	0.950013	3506201	1.7531e+06	FALSE	2872300	4503100	3280300	0	3066300	3402300	3148800	0	3445900	3000100
RRP9	0	3498300	0	0	1	3498301	1749151	FALSE	3063800	0	3382500	0	3855800	3554400	4582600	0	4104000	3899800
POLR2B	0	3473000	0	0	1	3473001	1736501	FALSE	0	0	3117600	0	3112800	0	2875500	2744000	0	0
CSNK2A1	3467200	0	0	0	3467201	1	1733601	FALSE	4941400	0	6177700	4023300	0	4019600	4963200	3180500	6144200	0
NMRAL1	3418000	0	0	0	3418001	1	1709001	FALSE	3923100	0	4080500	0	4064300	3973200	4560700	3958000	0	0
XPO5	4069100	3370100	4192800	0	0.970497	3370101	1.68505e+06	FALSE	4087600	3169700	6348900	4127500	3703200	4903800	4249700	5087600	3298300	0
QARS	3338500	0	0	3773800	3338501	2.64985e-07	1.66925e+06	FALSE	3983800	0	4358400	4675400	4422000	3507200	4168700	4618900	3468000	0
PSMD11	0	3254800	0	0	1	3254801	1627401	FALSE	3546800	0	4505500	0	4449200	2777500	1983000	2742800	0	0
RPL30	3226500	0	0	0	3226501	1	1613251	FALSE	0	0	0	5650200	7694900	0	0	0	0	0
EXOSC2	3194500	0	0	0	3194501	1	1597251	FALSE	3099400	0	0	0	0	0	0	0	0	0
ATP1A1	0	3161100	0	0	1	3161101	1580551	FALSE	3570700	3468400	2708600	3588900	3160900	0	0	0	3327100	0
RRP1	0	3127600	0	0	1	3127601	1563801	FALSE	0	0	0	0	0	0	2325200	0	0	4538100
GSPT1	4451300	3099900	4748100	0	0.937491	3099901	1.54995e+06	FALSE	4566200	0	4227500	0	3160600	3021000	4067700	0	2579700	3223900
RPS17	0	3070200	0	0	1	3070201	1535101	FALSE	1799000	0	2309300	2417900	3025800	2729000	0	0	1843000	0
SRP68	3062100	0	0	0	3062101	1	1531051	FALSE	1657500	2545600	2318100	0	2477400	0	1961300	0	0	0
ECH1	3007000	0	0	0	3007001	1	1503501	FALSE	6491600	0	3499100	0	6056600	0	5125600	4898000	0	0
GRB10	2981800	0	0	0	2981801	1	1490901	FALSE	2764100	0	3269200	0	3581400	0	2796200	0	3219900	0
PDHX	2537400	2974900	3169700	0	0.800517	2974901	1.48745e+06	FALSE	6993500	4266300	7985000	4344500	5677400	4872800	5609300	11653000	5201100	9601400
C14orf166	2895500	0	0	0	2895501	1	1447751	FALSE	3943100	0	0	0	3210600	0	0	2881500	2360800	0
BCAS2	2958100	2881700	3778100	0	0.78296	2881701	1.44085e+06	FALSE	3263500	2550900	0	3084900	2957600	3406000	3311500	0	0	0
APOC3	2864200	0	0	0	2864201	1	1432101	FALSE	0	0	0	0	0	0	0	0	0	0
VCP	0	2855800	0	0	1	2855801	1427901	FALSE	5850800	0	5311200	0	5658400	3502300	3476900	2630600	2301000	0
EDF1	0	2848900	3024400	0	3.30644e-07	2848901	1.42445e+06	FALSE	3190400	3461000	0	0	3404700	3029900	3076300	2905800	3044000	0
BAZ1B	2815800	0	0	0	2815801	1	1407901	FALSE	3542500	0	4066900	3129100	5138300	2947900	2293800	0	0	2677200
TCERG1	0	2774000	0	0	1	2774001	1387001	FALSE	4434100	0	3233200	0	2641000	2725000	0	0	0	0
RAB1B	2767900	0	0	3196200	2767901	3.12871e-07	1.38395e+06	FALSE	3524300	0	2804200	0	2924400	3144900	0	4051000	3488400	0
IGKV3D-11	0	2747800	0	0	1	2747801	1373901	FALSE	0	0	0	0	0	0	0	0	0	0
METTL1	2722700	0	0	0	2722701	1	1361351	FALSE	0	0	0	0	0	0	0	0	0	0
NUP43	2700000	0	0	0	2700001	1	1350001	FALSE	0	0	0	0	0	0	0	0	0	0
TNKS1BP1	0	2696000	3381000	0	2.9577e-07	2696001	1.348e+06	FALSE	3203600	3450000	3523800	0	4378400	3222600	2866400	0	0	0
GATAD2B	1739600	2687300	2326600	0	0.747701	2687301	1.34365e+06	FALSE	3105200	0	2037400	2177400	1724200	2470800	3179700	1935900	2760400	1907700
OLA1	0	2667800	2628000	0	3.80517e-07	2667801	1.3339e+06	FALSE	2666600	3864700	2414300	0	3591900	3120400	5839300	3259300	0	3272200
PTGES3L-AARSD1	2652000	0	0	0	2652001	1	1326001	FALSE	3089700	0	3406800	2602900	0	2703500	2750900	0	2879400	0
SS18	2645500	0	0	0	2645501	1	1322751	FALSE	2270600	2236000	1774700	0	1318700	2249400	2266200	2007800	4831500	0
ARID2	0	2577200	2947400	0	3.39282e-07	2577201	1.2886e+06	FALSE	3213300	0	0	0	3138800	3550100	0	0	3428900	0
UBTF	0	2563600	0	0	1	2563601	1281801	FALSE	3730200	0	3208600	5417300	2931600	2891500	2644100	2591700	3278600	0
ADSS	0	2529000	0	0	1	2529001	1264501	FALSE	0	0	0	0	0	0	0	0	0	0
NCOA1	2434800	0	0	0	2434801	1	1217401	FALSE	0	0	2448300	0	0	0	3120300	0	0	0
PRPF4B	0	2432900	3114900	0	3.21037e-07	2432901	1.21645e+06	FALSE	3128000	2761200	2801300	0	4981800	2935400	2338100	0	3653100	0
THUMPD1	3133800	2431600	4969800	0	0.630569	2431601	1.2158e+06	FALSE	4750000	0	5359000	4445900	3979900	3937700	4374600	0	3924300	0
SF3A2	2410100	0	0	0	2410101	1	1205051	FALSE	0	0	0	0	0	0	0	0	0	0
PAPSS1	0	2408100	0	0	1	2408101	1204051	FALSE	0	0	0	0	0	0	3236500	0	0	0
CSTF2	2367600	0	0	0	2367601	1	1183801	FALSE	2636700	3102700	0	0	0	0	2564800	0	3165600	0
FAM98B	0	2277600	3005000	0	3.32779e-07	2277601	1.1388e+06	FALSE	2678600	0	0	0	0	3081400	0	3020100	3273000	0
ANKFY1	0	2248400	0	0	1	2248401	1124201	FALSE	0	0	0	0	0	0	1915100	0	2061600	0
SKP1	2212900	0	0	0	2212901	1	1106451	FALSE	2965700	0	1793600	0	1704400	0	2169500	0	2011000	0
AHCYL2	0	2209600	0	0	1	2209601	1104801	FALSE	1580500	0	0	0	0	0	0	0	0	0
RRBP1	2193600	0	0	0	2193601	1	1096801	FALSE	2216600	0	2620200	0	2997100	0	0	1694800	0	0
PTPRF	2139500	0	0	0	2139501	1	1069751	FALSE	1992900	2795900	4381400	0	5036900	0	0	2572700	4095000	0
PDE12	2130900	0	0	0	2130901	1	1065451	FALSE	3002500	1845000	0	0	0	0	0	0	2244800	0
PSMD6	0	2126900	0	0	1	2126901	1063451	FALSE	4349200	0	2866700	0	3776500	2428700	0	0	0	0
ZNF460	1012100	2069500	1277700	0	0.792127	2069501	1.03475e+06	FALSE	1873600	0	1333200	2097500	1491700	2233900	2139900	830780	2857700	0
THOC6	2062300	1656600	0	1980000	2062301	0.836667	1.03115e+06	FALSE	1853400	1783800	1970100	0	1936000	1782200	0	0	1656700	0
CFDP1	2000100	0	0	0	2000101	1	1000051	FALSE	2857300	0	2427100	0	2042900	2897400	2005300	0	2071000	0
PMM2	1878800	0	0	0	1878801	1	939401	FALSE	2000900	0	0	0	2341200	0	0	0	0	0
UBE2I	0	1815600	0	0	1	1815601	907801	FALSE	0	0	0	0	0	0	0	0	0	0
UBE3A	0	1780100	0	0	1	1780101	890051	FALSE	2222000	0	0	0	1684200	0	0	2334000	0	0
WIZ	1768100	1928200	0	1993300	1768101	0.967341	884051	FALSE	2525500	0	2217500	0	1937300	2210700	1894100	0	1994300	0
BLVRB	0	1753700	0	0	1	1753701	876851	FALSE	0	0	0	0	0	0	0	0	0	0
DDB1	3034500	1684900	3188600	0	0.951672	1684901	842451	FALSE	3467000	1858300	3713000	2153200	3643200	2827000	2144000	3273200	2742800	1484300
SART1	0	1677600	1371000	0	7.29394e-07	1677601	838801	FALSE	1938400	1333300	1039000	1187600	1137400	1198500	1252600	0	1617300	1863300
TCEB3	0	1580800	0	0	1	1580801	790401	FALSE	1813300	0	1629800	0	1537400	1459800	1493300	0	0	0
TBL1X	0	1537100	0	0	1	1537101	768551	FALSE	0	0	0	0	0	0	0	0	0	0
FAM192A	1447400	0	0	0	1447401	1	723701	FALSE	2051400	0	1289900	0	0	0	1178100	0	1632900	0
PRKAR1A	1404900	0	0	1175500	1404901	8.50701e-07	702451	FALSE	1426100	1203300	1262800	0	1961900	0	0	1696700	0	0
SMARCD3	1366200	0	0	0	1366201	1	683101	FALSE	911080	0	0	807560	1215300	0	0	0	0	0
PARD3B	0	1284600	3058500	0	3.26958e-07	1284601	642301	FALSE	1466600	0	0	0	1447200	1613200	1589800	0	0	1985400
NEK9	0	1283900	0	0	1	1283901	641951	FALSE	1147900	1307100	1171800	0	1477500	1160400	1421700	0	1234200	0
AHCTF1	1275800	0	0	0	1275801	1	637901	FALSE	0	0	0	0	0	0	0	0	0	0
DDX47	1266400	0	0	0	1266401	1	633201	FALSE	2434900	0	0	0	1637500	0	0	0	0	0
STAG2	0	1204600	0	0	1	1204601	602301	FALSE	0	0	0	0	0	0	0	0	0	0
TXLNA	1123600	0	0	1109800	1123601	9.01062e-07	561801	FALSE	1359600	0	1024600	0	1162600	0	1179300	0	1017600	0
LRRFIP1	1057700	0	0	0	1057701	1	528851	FALSE	0	0	0	0	0	0	0	0	0	0
PIAS3	0	1054600	0	0	1	1054601	527301	FALSE	0	0	0	0	0	0	0	0	0	0
UBR5	0	1040700	1066100	0	9.37997e-07	1040701	520351	FALSE	976780	0	971120	0	908920	0	1034300	0	935000	0
CBX4	0	957980	0	0	1	957981	478991	FALSE	0	0	0	0	0	0	0	0	0	0
AKR1A1	0	947540	0	0	1	947541	473771	FALSE	0	0	0	0	2375300	1785400	0	0	808690	0
TEX10	808130	0	0	0	808131	1	404066	FALSE	0	0	0	0	0	0	0	0	0	0
FAM98A	0	690270	0	0	1	690271	345136	FALSE	0	0	0	0	0	0	0	0	0	0
PDLIM1	0	471250	0	0	1	471251	235626	FALSE	0	0	0	0	0	0	0	0	0	0
IPO4	0	459290	0	0	1	459291	229646	FALSE	0	0	0	0	0	0	0	0	0	0
TCEA1	2569400	5399900	2846000	1512800	0.902811	3.56947	2.23614	FALSE	5029100	2422200	1867600	3028200	3058200	3561700	3200600	2224100	4330200	3061300
CHERP	4728900	6762800	4763300	3532900	0.992778	1.91423	1.45351	FALSE	6466800	4167100	5374000	5498600	5081000	5717900	4649700	5417600	6040500	4188800
RBM17	2825800	3611600	2932100	2063500	0.963746	1.75023	1.35699	FALSE	3398300	2016000	2732400	0	3125400	2918500	2846100	2776300	3588500	2668000
RBBP4	23191000	0	13767000	0	1.68454	1	1.34227	FALSE	14897000	9281000	15309000	8970600	15507000	11520000	12357000	17294000	12742000	6715100
DNAJA1	4397600	10626000	6569000	5434600	0.669447	1.95525	1.31235	FALSE	7972400	6453900	5232300	5921200	5651000	6678000	6828900	6861100	8497900	10418000
ATN1	4328500	0	2682000	0	1.61391	1	1.30695	FALSE	2512600	0	5530900	0	2558100	2579700	3528800	2845700	3642400	0
STAT3	4317900	5834300	4511300	3561600	0.95713	1.63811	1.29762	FALSE	5084000	3323800	6387100	0	5547400	6903300	2786800	5059300	4765900	3810000
DDX27	3205700	2243800	1970500	2426600	1.62685	0.924668	1.27576	FALSE	2427500	1572000	1742400	0	2554200	1931000	1766300	2537800	1909500	0
EMG1	4312200	0	2838700	0	1.51908	1	1.25954	FALSE	2491400	0	0	0	4374200	0	0	0	0	0
PIN1	13377000	12990000	14075000	8562900	0.950409	1.51701	1.23371	FALSE	11201000	7418400	12664000	9927200	12427000	12813000	16260000	10380000	10455000	12248000
FUBP3	4693100	5631000	5383500	3609500	0.871756	1.56005	1.2159	FALSE	4593900	4178700	3860800	4147000	4512200	5821400	4742100	4071400	6301900	3325800
ACTR1B	6734300	3601900	4723700	3675300	1.42564	0.980029	1.20283	FALSE	4708100	3375400	4422500	3134900	6807900	4789600	3930600	0	3772900	2709100
GTF2I	9519700	9754200	9665200	6869700	0.984946	1.41989	1.20242	FALSE	12730000	9920100	11361000	10087000	10459000	9757300	10384000	10795000	12395000	14173000
NACC1	3330000	4277800	4256000	2645700	0.782425	1.61689	1.19966	FALSE	4533300	0	4285500	11174000	2929100	4615300	3371100	3549900	4759100	0
MCM6	2878600	0	2066200	0	1.39319	1	1.19659	FALSE	2865300	4255100	1273600	1810100	3349400	1984200	2675400	1562800	2345000	0
EIF4B	3148900	0	2280400	0	1.38085	1	1.19043	FALSE	2940100	0	1928400	1899600	2214700	0	0	0	0	0
PPP1CC	11780000	0	8916800	0	1.3211	1	1.16055	FALSE	8866700	0	11318000	7212000	9184900	9108300	7345000	8958000	6520400	0
ACTR3	3372300	0	2640600	0	1.2771	1	1.13855	FALSE	2811800	0	2645700	2469600	6032000	3381600	2873800	3420400	2091500	0
RBM12	8723400	6662700	8860100	5176100	0.984571	1.2872	1.13589	FALSE	12158000	0	16025000	7348500	10857000	10245000	9269500	10109000	9744700	0
UBXN1	2628700	0	2068700	0	1.2707	1	1.13535	FALSE	2600100	0	2317100	0	2648800	1846100	0	0	2464300	0
FLOT2	0	6612600	0	5256900	1	1.25789	1.12894	FALSE	4628400	0	0	4104100	5674000	5526600	0	4873400	4273400	0
LIG3	11418000	12686000	12291000	9684600	0.928972	1.30991	1.11944	FALSE	10911000	8165500	17115000	9390400	12133000	12392000	10543000	10076000	9046000	14301000
ZC3HAV1	1460400	1826700	1729400	1324500	0.844455	1.37916	1.11181	FALSE	1575700	1625000	1259400	1542400	1714100	1374100	1521400	1086500	1776000	1942200
NFIB	1937000	1947600	2260900	1428700	0.856739	1.3632	1.10997	FALSE	1548000	1693200	2108800	2099300	1640600	2620800	1742000	2201600	2767100	0
KDM1A	8407200	0	6991200	0	1.20254	1	1.10127	FALSE	6606200	3864100	9145100	7793300	6525900	8106200	5234500	0	5326500	0
TBL1XR1	7396700	9254400	9444900	6548600	0.783142	1.41319	1.09816	FALSE	10574000	4053300	12255000	10479000	9306600	11855000	6853100	8266700	9507300	6166900
PPA1	4623000	0	4005100	0	1.15428	1	1.07714	FALSE	0	0	4751300	0	3907100	4475200	7551100	0	0	0
FXR1	6779400	8891900	7689000	7012200	0.881701	1.26806	1.07488	FALSE	6731100	6213900	7331400	5677600	5559100	6126400	4764500	5897800	6584000	6174000
HNRNPH2	54755000	29216000	41503000	35323000	1.3193	0.82711	1.07321	FALSE	36388000	23937000	46475000	36921000	42820000	49925000	31704000	26552000	37490000	21126000
ATP6V1A	8284400	9264200	7056300	9558900	1.17404	0.96917	1.07161	FALSE	11986000	9879300	13112000	5671600	14622000	10680000	8812300	15434000	8379200	6673900
XRN2	15726000	12028000	12174000	14500000	1.29177	0.829517	1.06064	FALSE	8100900	10646000	9660300	13137000	10349000	11632000	9982000	9754600	10628000	12837000
CSE1L	46245000	25297000	39927000	26413000	1.15824	0.957748	1.05799	FALSE	80231000	33419000	54307000	36687000	61445000	46786000	47712000	45059000	42451000	19517000
LYPLA2	2651200	0	2377100	0	1.11531	1	1.05765	FALSE	1747900	0	0	0	2309000	2110200	0	2931800	1701800	0
TIAL1	8983500	7434900	7105500	8835100	1.2643	0.841519	1.05291	FALSE	8076300	6255700	8858000	9127700	6781500	7694800	3846500	0	7007000	6548200
MYH14	10573000	8435600	9062000	9049000	1.16674	0.932214	1.04948	FALSE	15220000	12526000	9939600	7902300	14620000	8083900	7955900	8563300	8577500	8901100
HNRNPUL2	5489400	8339700	6274000	6949900	0.874944	1.19997	1.03746	FALSE	5793800	0	7652100	6080500	5929400	6851100	8478300	5603000	6476100	5449600
SMARCA5	4780400	0	4470500	0	1.06932	1	1.03466	FALSE	4945500	5474800	4645200	0	0	3910900	7460400	4924200	0	0
RAB7A	0	6963000	0	6649500	1	1.04715	1.02357	FALSE	5030700	9771000	0	5122800	4587600	0	0	5609000	5887900	0
CMPK1	6654000	4102200	5612500	4810200	1.18557	0.852813	1.01919	FALSE	6977700	4659800	7221700	5773300	6617100	6277100	5626200	4994200	6096500	4041200
PPP1R8	9015300	9401500	15637000	6552200	0.576536	1.43486	1.0057	FALSE	12490000	0	16731000	4833100	6852500	6877400	4597500	7922900	10124000	0
RAB2A	0	4638200	0	4598300	1	1.00868	1.00434	FALSE	4395000	0	0	0	4206900	0	3392000	0	3989000	0
WARS	6444300	0	6436300	0	1.00124	1	1.00062	FALSE	5959100	0	4837200	0	6952500	5065600	0	6500700	0	0
PRDX6	12251000	9058300	13423000	8326800	0.912687	1.08785	1.00027	FALSE	11152000	9139900	11385000	16208000	11533000	11156000	8934300	13395000	10264000	0
AATK	0	0	0	0	1	1	1	FALSE	0	0	0	0	0	0	0	0	0	0
ABCA13	0	0	0	0	1	1	1	FALSE	0	0	0	0	0	0	3973100	0	5052900	6798100
ABCD1	0	0	0	0	1	1	1	FALSE	0	0	0	0	0	0	157630	0	0	0
ABCE1	0	0	0	0	1	1	1	FALSE	2949700	0	0	0	0	0	0	0	0	0
ABCF1	0	0	0	0	1	1	1	FALSE	0	381610	0	0	0	0	0	0	0	0
ACAA1	0	0	0	0	1	1	1	FALSE	1463700	0	2262500	0	1736100	1481000	0	0	0	0
ACAT1	0	0	0	0	1	1	1	FALSE	598740	0	0	0	0	0	0	0	0	0
ACAT2	0	0	0	0	1	1	1	FALSE	0	0	0	0	0	2131900	0	0	0	0
ACE	0	0	0	0	1	1	1	FALSE	0	0	0	0	0	0	0	0	0	0
ACIN1	0	0	0	0	1	1	1	FALSE	3323800	0	3755600	2456000	4031100	3455500	0	3348600	3548500	0
ACO2	0	0	0	0	1	1	1	FALSE	1926000	0	0	0	0	0	0	0	0	0
ACOX1	0	0	0	0	1	1	1	FALSE	1229200	0	0	0	0	0	0	0	0	0
ACP1	0	0	0	0	1	1	1	FALSE	0	0	1742000	0	1743900	0	0	0	0	0
AIMP2	0	0	0	0	1	1	1	FALSE	6081500	7020200	7017200	0	10248000	0	12426000	8133800	0	0
ALDH1B1	0	0	0	0	1	1	1	FALSE	0	0	0	0	0	0	0	384060	0	0
ALKBH5	0	0	0	0	1	1	1	FALSE	684660	0	0	0	0	0	0	0	0	0
ANP32B	0	0	0	0	1	1	1	FALSE	0	0	0	0	0	1362100	0	0	0	0
ANXA2	0	0	0	0	1	1	1	FALSE	0	0	0	0	0	0	224070	0	0	0
ANXA6	0	0	0	0	1	1	1	FALSE	2175900	0	0	0	2605700	0	0	0	0	0
AP1B1	0	0	0	0	1	1	1	FALSE	0	0	0	0	0	0	0	0	0	0
AP1G1	0	0	0	0	1	1	1	FALSE	0	0	0	3908700	0	0	0	0	0	0
AP2A1	0	0	0	0	1	1	1	FALSE	0	0	0	0	443250	0	0	0	0	0
AP2B1	0	0	0	0	1	1	1	FALSE	2902600	0	2378100	0	3066800	0	2014100	0	0	0
API5	0	0	0	0	1	1	1	FALSE	1925300	0	0	0	0	0	0	0	0	0
AQR	0	0	0	0	1	1	1	FALSE	4835000	0	2089500	0	3169100	2512800	2573200	0	0	0
AR	0	0	0	0	1	1	1	FALSE	0	0	10522000	0	0	0	0	0	0	0
ARFGAP3	0	0	0	0	1	1	1	FALSE	0	0	0	0	882600	0	0	0	0	0
ARG1	0	0	0	0	1	1	1	FALSE	1640400	0	0	0	0	0	0	0	0	0
ARHGAP17	0	0	0	0	1	1	1	FALSE	0	0	0	0	0	0	0	0	0	0
ARL1	0	0	0	0	1	1	1	FALSE	0	0	0	2308400	743970	0	0	0	0	0
ASMTL	0	0	0	0	1	1	1	FALSE	597040	0	0	0	893550	0	0	0	0	0
ASNA1	0	0	0	0	1	1	1	FALSE	2074600	0	0	0	763220	0	0	0	0	0
ATIC	0	0	0	0	1	1	1	FALSE	2327000	0	0	0	0	0	0	0	0	0
ATL1	0	0	0	0	1	1	1	FALSE	0	0	0	0	0	0	0	0	0	0
ATP5L	0	0	0	0	1	1	1	FALSE	884110	0	0	0	0	0	0	0	0	0
ATP5O	0	0	0	0	1	1	1	FALSE	2228600	0	0	0	0	0	0	0	0	0
ATP6V0A1	0	0	0	0	1	1	1	FALSE	0	0	0	0	688860	0	0	0	0	0
ATXN10	0	0	0	0	1	1	1	FALSE	13691000	0	0	0	11619000	0	0	0	10993000	0
BANF1	0	0	0	0	1	1	1	FALSE	4387600	0	0	0	0	0	17810000	0	0	0
BCCIP	0	0	0	0	1	1	1	FALSE	3414900	0	4138900	0	4965000	0	0	0	0	0
BLMH	0	0	0	0	1	1	1	FALSE	0	0	0	7115500	0	0	0	0	0	3663900
BLVRA	0	0	0	0	1	1	1	FALSE	0	0	1467900	0	0	0	0	0	0	0
BOP1	0	0	0	0	1	1	1	FALSE	2220400	0	0	0	0	0	0	0	0	0
BRAT1	0	0	0	0	1	1	1	FALSE	396490	0	0	0	0	0	0	0	0	0
BTAF1	0	0	0	0	1	1	1	FALSE	0	0	0	0	2756700	0	0	0	0	0
BUD31	0	0	0	0	1	1	1	FALSE	0	0	0	0	0	0	1507700	0	0	0
C11orf58	0	0	0	0	1	1	1	FALSE	1231900	0	0	0	0	0	0	0	0	0
C3orf38	0	0	0	0	1	1	1	FALSE	463380	0	0	0	0	0	0	0	0	0
C5orf51	0	0	0	0	1	1	1	FALSE	1147300	0	0	0	0	0	0	0	0	0
C6orf50	0	0	0	0	1	1	1	FALSE	0	0	0	0	0	0	0	0	0	0
C7orf50	0	0	0	0	1	1	1	FALSE	968980	0	0	0	0	0	0	0	0	0
C9orf142	0	0	0	0	1	1	1	FALSE	716650	0	0	0	0	0	0	0	0	0
CAD	0	0	0	0	1	1	1	FALSE	0	0	0	0	4165800	0	0	0	0	0
CANX	0	0	0	0	1	1	1	FALSE	0	577820	0	0	0	0	0	0	0	0
CARM1	0	0	0	0	1	1	1	FALSE	0	0	0	0	0	0	0	0	0	0
CARS	0	0	0	0	1	1	1	FALSE	0	0	934970	0	925010	0	0	0	0	0
CASZ1	0	0	0	0	1	1	1	FALSE	694740	0	1526700	0	0	0	0	0	0	0
CC2D1A	0	0	0	0	1	1	1	FALSE	2195400	0	0	0	0	0	0	0	0	0
CCNT1	0	0	0	0	1	1	1	FALSE	0	0	0	0	3767600	3858500	0	0	0	0
CCZ1	0	0	0	0	1	1	1	FALSE	0	0	0	0	0	0	0	0	0	0
CD2AP	0	0	0	0	1	1	1	FALSE	0	0	0	0	0	3381500	0	0	0	0
CDC73	0	0	0	0	1	1	1	FALSE	672960	0	0	0	0	0	0	0	0	0
CDK11A	0	0	0	0	1	1	1	FALSE	4701600	0	0	0	0	0	0	0	1992000	0
CDK5RAP3	0	0	0	0	1	1	1	FALSE	0	0	0	0	0	390940	0	0	0	0
CDSN	0	0	0	0	1	1	1	FALSE	1271300	0	0	0	0	0	0	0	0	0
CENPF	0	0	0	0	1	1	1	FALSE	0	0	0	0	0	0	0	0	0	0
CHCHD3	0	0	0	0	1	1	1	FALSE	2130100	2460100	2777200	2089900	3242200	2017000	1738900	1929500	1975000	0
CKAP5	0	0	0	0	1	1	1	FALSE	0	0	0	0	1617500	0	0	0	0	0
CKMT1B	0	0	0	0	1	1	1	FALSE	0	2346900	0	0	0	0	0	0	0	0
CMTR1	0	0	0	0	1	1	1	FALSE	1369500	0	0	0	0	0	0	0	0	0
CNOT7	0	0	0	0	1	1	1	FALSE	860920	0	0	0	0	0	0	0	0	0
COASY	0	0	0	0	1	1	1	FALSE	709700	0	0	0	0	0	0	0	0	0
COG1	0	0	0	0	1	1	1	FALSE	0	0	0	0	0	0	0	0	0	0
COG2	0	0	0	0	1	1	1	FALSE	0	0	0	0	1901100	0	0	0	0	0
COG3	0	0	0	0	1	1	1	FALSE	242770	0	0	0	0	0	0	0	0	0
COMT	0	0	0	0	1	1	1	FALSE	0	0	2606800	0	0	2855400	0	2776700	0	0
COPS2	0	0	0	0	1	1	1	FALSE	2820400	0	0	0	0	0	0	0	0	0
COPS3	0	0	0	0	1	1	1	FALSE	0	0	0	0	2829500	0	0	0	0	0
COPS4	0	0	0	0	1	1	1	FALSE	4748700	0	4855200	2989200	4671700	2903400	4839400	2783600	3337700	0
COX7A2	0	0	0	0	1	1	1	FALSE	1623900	0	0	0	0	0	0	0	0	0
CPSF1	0	0	0	0	1	1	1	FALSE	511000	0	0	0	0	0	0	0	0	0
CPSF2	0	0	0	0	1	1	1	FALSE	1410100	1377900	1598100	1631400	1725500	0	1364900	0	0	0
CPSF3	0	0	0	0	1	1	1	FALSE	1109800	0	1294700	0	0	0	0	0	0	0
CPSF3L	0	0	0	0	1	1	1	FALSE	467320	0	0	0	0	0	0	0	0	0
CPSF4	0	0	0	0	1	1	1	FALSE	300090	0	0	0	0	0	0	0	0	0
CREBBP	0	0	0	0	1	1	1	FALSE	0	1019100	0	0	0	0	0	0	0	0
CSK	0	0	0	0	1	1	1	FALSE	0	0	0	0	0	0	0	0	0	0
CSNK2A2	0	0	0	0	1	1	1	FALSE	2105400	0	0	0	0	0	0	0	0	0
CTNNA1	0	0	0	0	1	1	1	FALSE	8285000	0	10455000	0	11503000	6279400	6230400	0	6979200	0
CTR9	0	0	0	0	1	1	1	FALSE	0	0	1441600	0	2728600	1756300	1427800	0	0	0
CTTN	0	0	0	0	1	1	1	FALSE	2622000	0	2274000	0	1873500	0	0	0	0	2789200
CUL3	0	0	0	0	1	1	1	FALSE	0	0	0	0	2615500	0	0	0	0	0
CUL5	0	0	0	0	1	1	1	FALSE	0	585540	0	0	0	0	0	0	0	0
CWC15	0	0	0	0	1	1	1	FALSE	0	0	0	0	0	0	0	0	0	0
CWF19L1	0	0	0	0	1	1	1	FALSE	0	0	0	0	0	0	0	0	0	0
CYFIP1	0	0	0	0	1	1	1	FALSE	1771900	0	0	0	0	0	0	0	0	0
CYP4F12	0	0	0	0	1	1	1	FALSE	0	0	0	0	0	0	0	0	2630100	0
DAD1	0	0	0	0	1	1	1	FALSE	0	0	0	0	0	0	0	0	0	686950
DCAF11	0	0	0	0	1	1	1	FALSE	2501900	0	1549200	0	1662300	0	0	0	0	0
DDX18	0	0	0	0	1	1	1	FALSE	1469800	0	0	0	3026800	0	0	0	0	0
DDX39A	0	0	0	0	1	1	1	FALSE	2072000	0	0	0	0	0	0	0	0	0
DDX54	0	0	0	0	1	1	1	FALSE	0	406620	0	0	0	0	0	0	0	0
DECR2	0	0	0	0	1	1	1	FALSE	527460	0	0	0	0	0	0	0	0	0
DHX16	0	0	0	0	1	1	1	FALSE	2570300	0	0	0	0	0	0	0	0	0
DIDO1	0	0	0	0	1	1	1	FALSE	0	0	859600	0	0	0	1097800	0	0	0
DKFZp686E0752	0	0	0	0	1	1	1	FALSE	766040	0	0	0	0	0	0	0	0	0
DLAT	0	0	0	0	1	1	1	FALSE	3582000	0	3071100	0	3344000	0	0	0	0	0
DLD	0	0	0	0	1	1	1	FALSE	1994600	0	0	0	0	0	0	0	0	0
DLG4	0	0	0	0	1	1	1	FALSE	0	0	0	0	0	0	0	0	0	0
DNAH3	0	0	0	0	1	1	1	FALSE	0	0	0	0	0	0	0	0	0	0
DNAJA2	0	0	0	0	1	1	1	FALSE	2662900	0	0	0	0	0	0	0	0	0
DNAJB1	0	0	0	0	1	1	1	FALSE	1347500	0	0	0	0	0	0	0	0	0
DNAJC13	0	0	0	0	1	1	1	FALSE	0	0	0	0	246640	0	0	0	0	0
DNAJC7	0	0	0	0	1	1	1	FALSE	2115300	0	1339300	0	1614500	1399000	0	0	1631100	0
DNAJC9	0	0	0	0	1	1	1	FALSE	2501900	0	0	0	2439200	0	0	0	1996500	0
DSC3	0	0	0	0	1	1	1	FALSE	0	0	0	4829500	0	0	0	0	0	0
DST	0	0	0	0	1	1	1	FALSE	0	0	0	0	0	0	0	0	0	0
DUSP3	0	0	0	0	1	1	1	FALSE	3145300	0	0	0	0	0	0	0	0	0
DYNC1I2	0	0	0	0	1	1	1	FALSE	0	921970	0	0	0	0	0	0	0	0
DYNC2H1	0	0	0	0	1	1	1	FALSE	0	0	0	0	0	0	0	0	0	0
ECI1	0	0	0	0	1	1	1	FALSE	0	0	0	0	0	0	0	0	0	822140
EDC4	0	0	0	0	1	1	1	FALSE	919870	0	0	0	0	0	0	0	0	0
EIF2S2	0	0	0	0	1	1	1	FALSE	3427700	0	0	0	0	0	0	0	0	0
EIF3E	0	0	0	0	1	1	1	FALSE	0	0	0	0	2129400	0	3893100	0	2200500	0
EIF4E	0	0	0	0	1	1	1	FALSE	2465400	0	0	0	0	0	0	0	0	0
EIF4H	0	0	0	0	1	1	1	FALSE	7903400	6307400	7085800	0	0	0	8848800	0	11373000	6990700
EIF5B	0	0	0	0	1	1	1	FALSE	5682800	0	0	0	0	0	0	0	0	0
ELMSAN1	0	0	0	0	1	1	1	FALSE	0	0	0	0	0	0	0	0	0	702070
EML4	0	0	0	0	1	1	1	FALSE	0	0	0	0	0	0	0	0	979760	0
ENAH	0	0	0	0	1	1	1	FALSE	0	0	0	0	936470	0	0	0	451760	0
ENSA	0	0	0	0	1	1	1	FALSE	804400	0	0	0	0	0	0	0	0	0
ENY2	0	0	0	0	1	1	1	FALSE	997260	0	0	0	0	0	0	0	0	0
ERC2	0	0	0	0	1	1	1	FALSE	0	0	0	0	0	0	0	0	0	0
ESRP1	0	0	0	0	1	1	1	FALSE	1750600	0	0	0	0	0	0	0	0	0
ESRRA	0	0	0	0	1	1	1	FALSE	475180	0	0	0	0	0	0	0	0	0
ESYT1	0	0	0	0	1	1	1	FALSE	811950	0	0	0	0	0	0	0	0	0
EXOSC10	0	0	0	0	1	1	1	FALSE	0	0	0	0	1786800	0	0	0	0	0
EXOSC3	0	0	0	0	1	1	1	FALSE	0	0	0	0	0	0	0	0	2343500	0
EXOSC6	0	0	0	0	1	1	1	FALSE	0	0	0	0	0	0	0	0	0	0
FAHD1	0	0	0	0	1	1	1	FALSE	586300	0	0	0	0	0	0	0	0	0
FAM155A	0	0	0	0	1	1	1	FALSE	0	0	0	0	0	0	0	0	0	0
FAM208B	0	0	0	0	1	1	1	FALSE	494210	0	0	0	0	0	0	0	0	0
FAM91A1	0	0	0	0	1	1	1	FALSE	0	0	0	0	211980	0	0	0	0	0
FAN1	0	0	0	0	1	1	1	FALSE	0	2725000000	0	0	0	0	0	0	0	0
FBLL1	0	0	0	0	1	1	1	FALSE	0	0	0	0	0	0	0	0	7039500	0
FDPS	0	0	0	0	1	1	1	FALSE	0	949430	0	0	0	0	0	0	0	0
FECH	0	0	0	0	1	1	1	FALSE	409680	0	0	0	0	0	0	0	0	0
FHOD1	0	0	0	0	1	1	1	FALSE	0	0	0	0	0	0	0	0	0	0
FIP1L1	0	0	0	0	1	1	1	FALSE	1360900	0	0	0	0	0	0	0	0	0
FN1	0	0	0	0	1	1	1	FALSE	0	0	0	0	0	0	0	0	972750	0
FOLH1B	0	0	0	0	1	1	1	FALSE	0	0	0	0	0	0	0	3194100	2913000	0
GAK	0	0	0	0	1	1	1	FALSE	0	0	0	0	0	0	0	0	0	0
GALK1	0	0	0	0	1	1	1	FALSE	2211700	0	0	0	0	0	0	0	0	0
GAMT	0	0	0	0	1	1	1	FALSE	2039500	0	0	0	1801400	0	2354300	0	0	0
GANAB	0	0	0	0	1	1	1	FALSE	0	0	3066300	0	0	0	0	0	0	0
GATA2	0	0	0	0	1	1	1	FALSE	0	0	2636200	0	2377500	0	0	0	0	0
GET4	0	0	0	0	1	1	1	FALSE	0	0	0	693620	0	0	0	0	0	0
GIGYF2	0	0	0	0	1	1	1	FALSE	0	0	909780	0	1522300	0	945430	0	1176300	0
GINS3	0	0	0	0	1	1	1	FALSE	0	0	0	0	0	0	0	0	777540	0
GLB1L2	0	0	0	0	1	1	1	FALSE	0	0	0	0	0	0	0	0	0	0
GLO1	0	0	0	0	1	1	1	FALSE	1245300	0	0	0	0	0	0	0	0	0
GLUD1	0	0	0	0	1	1	1	FALSE	0	0	0	0	0	0	0	0	0	0
GLYR1	0	0	0	0	1	1	1	FALSE	0	0	0	0	1741600	0	0	0	0	0
GOLGB1	0	0	0	0	1	1	1	FALSE	0	0	0	0	0	0	0	0	0	0
GOT2	0	0	0	0	1	1	1	FALSE	855720	0	0	0	0	0	0	0	0	0
GPR156	0	0	0	0	1	1	1	FALSE	0	0	0	0	0	0	0	0	0	0
GPS1	0	0	0	0	1	1	1	FALSE	2138100	0	0	0	2730300	0	0	0	0	0
GTF2E2	0	0	0	0	1	1	1	FALSE	3451800	0	0	0	2365200	0	0	0	0	0
GTF2H2C	0	0	0	0	1	1	1	FALSE	3418100	0	0	0	0	0	0	0	0	0
HACD3	0	0	0	0	1	1	1	FALSE	0	0	1555900	1898600	1493100	1579100	0	0	1592500	0
HAL	0	0	0	0	1	1	1	FALSE	0	0	0	7931300	0	0	0	0	0	0
HDAC3	0	0	0	0	1	1	1	FALSE	673380	0	0	0	0	0	0	0	0	0
HEATR1	0	0	0	0	1	1	1	FALSE	0	0	0	0	2513100	0	0	0	0	0
HEXIM1	0	0	0	0	1	1	1	FALSE	1596700	0	0	0	0	0	0	0	0	0
HIST1H1E	0	0	0	0	1	1	1	FALSE	7540100	0	0	0	15785000	0	0	0	0	0
HIST1H2AC	0	0	0	0	1	1	1	FALSE	1565200	0	0	0	0	0	0	0	0	0
HK1	0	0	0	0	1	1	1	FALSE	1038300	0	0	0	0	0	0	0	0	0
HMBS	0	0	0	0	1	1	1	FALSE	0	0	0	0	1425000	1167600	0	0	0	0
HMCES	0	0	0	0	1	1	1	FALSE	0	0	4475200	0	1867100	0	0	0	0	0
HMGB3	0	0	0	0	1	1	1	FALSE	3244200	0	0	0	0	0	0	0	0	0
HPSE2	0	0	0	0	1	1	1	FALSE	0	0	0	0	0	0	0	0	0	0
HSD17B10	0	0	0	0	1	1	1	FALSE	5202500	0	8715000	0	7137000	3819400	5052900	0	4070400	0
HSP90B1	0	0	0	0	1	1	1	FALSE	0	0	2958300	0	4049300	0	3899200	0	0	0
HSPH1	0	0	0	0	1	1	1	FALSE	432610	0	0	0	0	0	0	0	0	0
ICT1	0	0	0	0	1	1	1	FALSE	1467200	0	0	0	0	0	0	0	0	0
IDE	0	0	0	0	1	1	1	FALSE	1494500	0	0	0	0	0	0	0	0	0
IDH2	0	0	0	0	1	1	1	FALSE	2413100	0	2306100	0	0	0	2075500	2530500	1872000	0
IGHG2	0	0	0	0	1	1	1	FALSE	0	0	0	0	0	0	0	0	0	0
IGKV1-12	0	0	0	0	1	1	1	FALSE	0	0	0	0	0	0	0	0	0	0
IGLV3-9	0	0	0	0	1	1	1	FALSE	0	0	0	0	0	0	0	0	0	0
IKBKB	0	0	0	0	1	1	1	FALSE	0	0	0	0	0	0	0	0	0	0
INADL	0	0	0	0	1	1	1	FALSE	0	0	0	0	0	0	0	0	0	0
INTS10	0	0	0	0	1	1	1	FALSE	0	0	0	0	1544100	0	0	0	0	0
INTS9	0	0	0	0	1	1	1	FALSE	895640	0	1258800	0	1053300	851060	901320	0	917770	0
IPO8	0	0	0	0	1	1	1	FALSE	0	0	0	0	3133800	0	0	0	0	0
IQGAP1	0	0	0	0	1	1	1	FALSE	0	0	0	0	874680	0	0	0	0	0
IQUB	0	0	0	0	1	1	1	FALSE	0	0	0	0	0	0	0	0	0	0
IRF2BP1	0	0	0	0	1	1	1	FALSE	2398000	0	2543300	0	2307900	2530900	0	2014100	2360900	0
IRF2BP2	0	0	0	0	1	1	1	FALSE	0	0	5400500	2917100	2602100	2738500	0	0	0	0
KCNH6	0	0	0	0	1	1	1	FALSE	0	0	0	0	0	0	770070	0	0	0
KDM3B	0	0	0	0	1	1	1	FALSE	1573500	0	2596000	2449300	0	2077200	1187300	0	1977700	0
KPNA4	0	0	0	0	1	1	1	FALSE	227770	0	0	0	0	0	0	0	0	0
KPNA6	0	0	0	0	1	1	1	FALSE	0	0	0	0	0	0	0	0	0	0
KRT17	0	0	0	0	1	1	1	FALSE	0	0	0	5040700	0	0	0	4390900	0	9480500
KRT23	0	0	0	0	1	1	1	FALSE	319030	0	0	0	0	0	0	0	0	0
KRT27	0	0	0	0	1	1	1	FALSE	774030	0	0	0	0	0	0	0	0	0
KRT3	0	0	0	0	1	1	1	FALSE	0	0	0	0	0	0	0	0	485000	0
KRT7	0	0	0	0	1	1	1	FALSE	0	0	0	1893200	0	0	0	0	0	0
KRT80	0	0	0	0	1	1	1	FALSE	0	0	0	5761200	0	0	0	0	0	0
KRTAP15-1	0	0	0	0	1	1	1	FALSE	0	0	0	0	0	0	0	0	0	0
LASP1	0	0	0	0	1	1	1	FALSE	843910	0	0	0	0	0	0	0	0	0
LDB1	0	0	0	0	1	1	1	FALSE	1121700	0	0	0	0	0	0	0	0	0
LENG9	0	0	0	0	1	1	1	FALSE	815530	0	0	0	0	0	0	0	0	0
LONP1	0	0	0	0	1	1	1	FALSE	0	0	0	0	0	0	0	0	270550	0
LRBA	0	0	0	0	1	1	1	FALSE	0	0	0	0	4154300	0	0	0	0	0
LRRC47	0	0	0	0	1	1	1	FALSE	5026100	0	4382600	0	0	0	0	0	0	0
LUC7L	0	0	0	0	1	1	1	FALSE	0	0	0	0	0	0	0	0	0	0
MAGOH	0	0	0	0	1	1	1	FALSE	291700	0	0	0	0	0	0	0	0	0
MAK16	0	0	0	0	1	1	1	FALSE	2263800	0	0	0	0	0	0	0	0	0
MAPK1	0	0	0	0	1	1	1	FALSE	3586300	0	0	0	0	0	0	0	0	0
MAPK14	0	0	0	0	1	1	1	FALSE	0	0	0	0	0	0	0	0	0	0
MDC1	0	0	0	0	1	1	1	FALSE	2219700	0	2651700	0	0	2516600	0	0	0	0
MED24	0	0	0	0	1	1	1	FALSE	249700	0	0	0	0	0	0	0	0	0
MED29	0	0	0	0	1	1	1	FALSE	0	0	0	0	0	0	0	0	0	0
MEMO1	0	0	0	0	1	1	1	FALSE	0	0	0	0	0	0	0	0	3449700	0
METTL3	0	0	0	0	1	1	1	FALSE	2485500	0	0	0	0	0	0	0	0	0
MFAP1	0	0	0	0	1	1	1	FALSE	754800	0	0	0	0	0	0	0	0	0
MGEA5	0	0	0	0	1	1	1	FALSE	2539700	0	2266300	0	0	0	0	2395500	0	0
MNAT1	0	0	0	0	1	1	1	FALSE	2109900	0	0	0	0	0	0	0	0	0
MORC2	0	0	0	0	1	1	1	FALSE	0	0	1747000	0	0	2006000	0	0	1710700	0
MRPL1	0	0	0	0	1	1	1	FALSE	2139900	0	0	0	0	0	0	0	0	0
MRPL13	0	0	0	0	1	1	1	FALSE	1312400	0	0	0	0	0	0	0	0	0
MRPL14	0	0	0	0	1	1	1	FALSE	0	0	0	0	0	0	0	1369200	0	0
MRPL23	0	0	0	0	1	1	1	FALSE	642160	0	0	0	0	0	0	0	0	0
MRPL37	0	0	0	0	1	1	1	FALSE	0	0	0	0	0	1389800	0	0	0	0
MRPL38	0	0	0	0	1	1	1	FALSE	957150	0	0	0	0	0	0	0	0	0
MRPL39	0	0	0	0	1	1	1	FALSE	1684000	0	0	0	0	0	0	0	0	0
MRPL4	0	0	0	0	1	1	1	FALSE	3830200	0	4785000	0	0	0	0	0	0	0
MRPL41	0	0	0	0	1	1	1	FALSE	0	0	0	0	0	0	695730	0	0	0
MRPL55	0	0	0	0	1	1	1	FALSE	1403500	0	0	0	0	0	0	0	0	0
MRPS2	0	0	0	0	1	1	1	FALSE	232260	0	0	0	0	0	0	0	0	0
MRPS22	0	0	0	0	1	1	1	FALSE	2324200	0	2470400	2274600	2308900	0	0	2733000	0	2621300
MRPS27	0	0	0	0	1	1	1	FALSE	0	0	0	0	621490	0	0	0	0	0
MRPS35	0	0	0	0	1	1	1	FALSE	1265400	0	1583700	0	1990400	0	0	0	978230	0
MTA1	0	0	0	0	1	1	1	FALSE	3074100	0	0	0	0	0	0	0	0	0
MTDH	0	0	0	0	1	1	1	FALSE	4010900	0	4294000	0	3686000	0	3733100	4401300	0	0
MVK	0	0	0	0	1	1	1	FALSE	863680	0	0	0	0	0	0	0	0	0
MYEF2	0	0	0	0	1	1	1	FALSE	2403100	0	2219400	0	2479100	2403800	0	0	2262500	0
NAGK	0	0	0	0	1	1	1	FALSE	1221400	0	0	0	0	0	0	0	0	0
NANS	0	0	0	0	1	1	1	FALSE	0	0	10367000	0	0	6868200	0	0	0	0
NAPG	0	0	0	0	1	1	1	FALSE	2148700	0	0	0	0	0	0	0	1784300	0
NASP	0	0	0	0	1	1	1	FALSE	0	1008100	0	0	0	0	0	0	0	0
NAT1	0	0	0	0	1	1	1	FALSE	0	0	0	0	0	1375000	0	0	0	0
NCBP1	0	0	0	0	1	1	1	FALSE	3703600	0	3853400	0	3694500	3451000	3979800	0	0	0
NCBP2	0	0	0	0	1	1	1	FALSE	0	0	0	0	0	0	0	0	0	0
NCOR1	0	0	0	0	1	1	1	FALSE	0	0	4063300	0	2739200	2754600	0	0	3299200	0
NDNL2	0	0	0	0	1	1	1	FALSE	235470	0	0	0	0	0	0	0	0	0
NDUFA10	0	0	0	0	1	1	1	FALSE	0	367490	0	0	0	0	0	0	0	0
NDUFA13	0	0	0	0	1	1	1	FALSE	1929300	0	0	0	0	0	0	0	0	0
NDUFA5	0	0	0	0	1	1	1	FALSE	1245100	0	827860	0	0	0	0	0	0	0
NDUFA9	0	0	0	0	1	1	1	FALSE	705640	0	0	0	0	0	0	0	0	0
NDUFB10	0	0	0	0	1	1	1	FALSE	549380	0	0	0	0	0	0	0	0	0
NDUFS3	0	0	0	0	1	1	1	FALSE	833410	0	0	0	0	0	0	0	0	0
NDUFV1	0	0	0	0	1	1	1	FALSE	1026100	0	1354100	0	1239400	0	0	1011500	0	0
NEDD8	0	0	0	0	1	1	1	FALSE	9609500	0	0	0	0	0	0	0	0	0
NEIL2	0	0	0	0	1	1	1	FALSE	0	0	1241400	0	889350	0	0	0	0	0
NEK7	0	0	0	0	1	1	1	FALSE	0	0	0	0	0	2518600	0	0	0	1793300
NELFA	0	0	0	0	1	1	1	FALSE	4392500	0	3169100	0	2167400	3357000	0	0	2952500	0
NELFCD	0	0	0	0	1	1	1	FALSE	0	0	0	0	2115200	0	0	0	0	0
NELFE	0	0	0	0	1	1	1	FALSE	2838300	0	2003600	0	1753000	1838100	1815100	0	0	0
NLE1	0	0	0	0	1	1	1	FALSE	2261700	0	2696100	0	0	3388000	2976200	0	0	0
NOC4L	0	0	0	0	1	1	1	FALSE	1653600	0	0	0	0	0	0	0	0	0
NOL11	0	0	0	0	1	1	1	FALSE	0	0	1427700	0	1371400	0	0	0	1182200	0
NOP9	0	0	0	0	1	1	1	FALSE	0	0	0	0	1005200	0	0	0	0	0
NQO1	0	0	0	0	1	1	1	FALSE	1465400	1418600	1574900	0	1840400	1072200	1646700	0	1726100	0
NR2F1	0	0	0	0	1	1	1	FALSE	382250	0	0	0	0	0	0	0	0	0
NR2F6	0	0	0	0	1	1	1	FALSE	0	0	0	0	0	0	0	0	0	0
NSA2	0	0	0	0	1	1	1	FALSE	488530	0	0	0	0	0	0	0	0	0
NSF	0	0	0	0	1	1	1	FALSE	1403100	0	868930	0	1732200	980010	1653300	0	1527100	0
NUBP2	0	0	0	0	1	1	1	FALSE	696210	0	0	0	0	0	0	0	0	0
NUCKS1	0	0	0	0	1	1	1	FALSE	715830	0	0	0	0	0	0	0	0	0
NUDC	0	0	0	0	1	1	1	FALSE	549280	0	0	0	0	0	0	0	0	0
NUDT16L1	0	0	0	0	1	1	1	FALSE	0	0	2757600	0	2281500	2634600	0	0	3300400	0
NUP155	0	0	0	0	1	1	1	FALSE	4653100	0	5080300	5957800	7173200	5413600	5403800	0	3881900	0
NUP37	0	0	0	0	1	1	1	FALSE	297740	0	0	0	0	0	0	0	0	0
NUP85	0	0	0	0	1	1	1	FALSE	0	0	0	0	1398800	2200900	0	0	0	0
NVL	0	0	0	0	1	1	1	FALSE	0	454770	0	0	0	0	0	0	0	0
OGDH	0	0	0	0	1	1	1	FALSE	1667500	0	2586700	0	2130900	1538200	0	2767300	0	0
OGFOD1	0	0	0	0	1	1	1	FALSE	0	515520	0	0	0	0	0	0	0	0
OSBP	0	0	0	0	1	1	1	FALSE	0	0	1837900	0	2085700	0	0	0	0	0
OXCT1	0	0	0	0	1	1	1	FALSE	0	0	1363300	0	1272700	0	1306400	0	0	0
PAFAH1B2	0	0	0	0	1	1	1	FALSE	1952600	0	1937100	0	2355800	1959600	0	0	0	0
PAK4	0	0	0	0	1	1	1	FALSE	1009500	0	1049800	0	1272200	0	0	0	0	2986100
PARP12	0	0	0	0	1	1	1	FALSE	0	0	0	0	0	0	0	0	0	0
PARP9	0	0	0	0	1	1	1	FALSE	0	0	0	0	0	0	0	0	0	0
PC	0	0	0	0	1	1	1	FALSE	1268100	0	0	0	0	0	0	0	0	0
PCLO	0	0	0	0	1	1	1	FALSE	0	0	0	0	0	0	0	10929000	0	0
PCNA	0	0	0	0	1	1	1	FALSE	2646300	2393100	0	0	0	0	2443300	0	2499600	0
PDCD2	0	0	0	0	1	1	1	FALSE	480630	0	0	0	0	0	0	0	0	0
PDHA1	0	0	0	0	1	1	1	FALSE	2545000	0	2756000	0	1930400	0	0	0	0	0
PDIA3	0	0	0	0	1	1	1	FALSE	0	0	0	0	0	0	1094400	0	0	0
PDRG1	0	0	0	0	1	1	1	FALSE	270570	0	0	0	0	0	0	0	0	0
PEF1	0	0	0	0	1	1	1	FALSE	680810	0	0	0	0	0	0	0	0	0
PELP1	0	0	0	0	1	1	1	FALSE	0	0	0	0	0	321840	0	0	0	0
PFDN5	0	0	0	0	1	1	1	FALSE	0	0	0	0	0	3077600	0	0	0	0
PFKM	0	0	0	0	1	1	1	FALSE	4558100	0	0	0	3199900	0	0	0	3640200	0
PHF3	0	0	0	0	1	1	1	FALSE	250130	0	0	0	0	0	0	0	0	0
PHF6	0	0	0	0	1	1	1	FALSE	0	0	0	0	0	0	0	0	0	0
PITX1	0	0	0	0	1	1	1	FALSE	2226100	0	0	0	0	0	0	0	0	0
PLCB4	0	0	0	0	1	1	1	FALSE	0	0	0	0	0	0	0	0	0	0
PNN	0	0	0	0	1	1	1	FALSE	0	0	0	0	3124400	0	0	0	0	0
PNPO	0	0	0	0	1	1	1	FALSE	0	7742000	0	0	5301300	0	10371000	0	0	14459000
POGZ	0	0	0	0	1	1	1	FALSE	0	0	0	0	0	4593100	0	0	0	0
POLA2	0	0	0	0	1	1	1	FALSE	0	1435300	0	0	0	0	0	0	0	0
POLD2	0	0	0	0	1	1	1	FALSE	685980	0	0	0	0	0	0	0	0	0
POLR1C	0	0	0	0	1	1	1	FALSE	0	0	0	0	1796200	0	0	0	0	0
PPA2	0	0	0	0	1	1	1	FALSE	0	562810	0	0	0	0	0	0	0	0
PPIE	0	0	0	0	1	1	1	FALSE	518520	0	0	0	0	0	0	0	0	0
PPIH	0	0	0	0	1	1	1	FALSE	1298700	0	0	0	0	0	0	0	0	0
PPM1G	0	0	0	0	1	1	1	FALSE	0	5995100	3165400	0	0	0	3396900	0	0	0
PPME1	0	0	0	0	1	1	1	FALSE	2008300	0	1762700	0	0	0	0	0	0	0
PPP1CA	0	0	0	0	1	1	1	FALSE	0	0	0	0	0	0	0	0	0	0
PPP1R10	0	0	0	0	1	1	1	FALSE	1652200	0	1809100	0	0	0	0	1640900	2005500	0
PPP2R1A	0	0	0	0	1	1	1	FALSE	8285500	0	10315000	0	11192000	5874800	10525000	0	7811800	0
PPP2R1B	0	0	0	0	1	1	1	FALSE	1017400	0	0	0	0	0	0	0	0	0
PRKACB	0	0	0	0	1	1	1	FALSE	1684600	0	2471300	1849700	3085900	2340100	3088700	0	0	0
PRKAR2A	0	0	0	0	1	1	1	FALSE	265540	0	0	0	0	0	0	0	0	0
PRKRA	0	0	0	0	1	1	1	FALSE	1133700	0	0	0	0	0	0	0	0	0
PRMT5	0	0	0	0	1	1	1	FALSE	1610500	0	0	0	1904300	0	0	2231300	0	0
PRPF38A	0	0	0	0	1	1	1	FALSE	0	0	0	0	0	0	0	0	0	1975600
PRSS1	0	0	0	0	1	1	1	FALSE	0	0	0	0	0	0	0	0	0	0
PSAT1	0	0	0	0	1	1	1	FALSE	870950	0	0	0	0	0	0	0	0	0
PSIP1	0	0	0	0	1	1	1	FALSE	766750	0	0	0	0	0	0	0	0	0
PSMB5	0	0	0	0	1	1	1	FALSE	0	4980800	0	0	0	0	0	0	0	0
PSMC1	0	0	0	0	1	1	1	FALSE	0	0	0	0	5512300	0	0	0	0	0
PSMC4	0	0	0	0	1	1	1	FALSE	2400700	2205900	2599900	0	2760300	2261800	0	0	1842000	0
PSMC6	0	0	0	0	1	1	1	FALSE	1526000	1314800	0	0	1509700	0	0	1655200	0	0
PSMD12	0	0	0	0	1	1	1	FALSE	0	0	0	1332200	0	1401300	1770500	0	1412400	0
PSMD13	0	0	0	0	1	1	1	FALSE	0	0	1942300	0	0	0	0	0	0	0
PSMD4	0	0	0	0	1	1	1	FALSE	0	3339300	0	0	0	0	0	0	0	0
PSMD7	0	0	0	0	1	1	1	FALSE	7083000	0	3336100	0	6373500	5452000	0	0	4933400	4929900
PSMD8	0	0	0	0	1	1	1	FALSE	0	0	0	0	3008200	0	0	0	0	0
PSMG1	0	0	0	0	1	1	1	FALSE	0	0	0	0	0	0	337030	0	0	0
PTMA	0	0	0	0	1	1	1	FALSE	0	187250	0	0	0	0	0	0	0	0
PTPRM	0	0	0	0	1	1	1	FALSE	0	0	0	0	0	0	0	0	0	0
PWP2	0	0	0	0	1	1	1	FALSE	0	0	2783300	0	2748600	0	0	0	0	0
PYCR1	0	0	0	0	1	1	1	FALSE	0	0	0	0	0	0	2126500	0	0	0
PYCR2	0	0	0	0	1	1	1	FALSE	720350	0	0	0	0	0	0	0	0	0
PYGB	0	0	0	0	1	1	1	FALSE	935670	0	0	0	0	0	0	0	0	0
RAB14	0	0	0	0	1	1	1	FALSE	1981900	0	0	0	0	0	0	0	0	0
RAB3GAP1	0	0	0	0	1	1	1	FALSE	0	0	0	75356000	0	0	0	0	0	0
RAB5C	0	0	0	0	1	1	1	FALSE	359600	0	0	0	0	0	0	0	0	0
RAD23B	0	0	0	0	1	1	1	FALSE	2333300	0	0	2095900	1637700	2032600	1967500	0	0	0
RANBP1	0	0	0	0	1	1	1	FALSE	3993100	0	0	0	0	0	0	0	0	0
RANBP10	0	0	0	0	1	1	1	FALSE	0	3774000	0	0	0	0	0	0	0	0
RANGAP1	0	0	0	0	1	1	1	FALSE	2406100	0	0	0	0	0	0	0	0	0
RBBP6	0	0	0	0	1	1	1	FALSE	0	10782000	0	0	0	0	5304000	0	0	0
RBM42	0	0	0	0	1	1	1	FALSE	285120	0	0	0	0	0	0	0	0	0
RBM5	0	0	0	0	1	1	1	FALSE	1106700	0	0	0	0	0	0	0	0	0
REV1	0	0	0	0	1	1	1	FALSE	0	0	0	0	0	0	0	0	0	0
RFC2	0	0	0	0	1	1	1	FALSE	1130200	0	0	0	0	0	0	0	0	0
RFC3	0	0	0	0	1	1	1	FALSE	0	0	0	0	0	0	0	0	0	0
RGL3	0	0	0	0	1	1	1	FALSE	0	0	0	0	0	0	0	0	0	0
RING1	0	0	0	0	1	1	1	FALSE	3489100	0	0	0	0	0	0	0	0	0
RNASEH2A	0	0	0	0	1	1	1	FALSE	0	336820	0	0	0	0	0	0	0	0
RNF187	0	0	0	0	1	1	1	FALSE	0	632310	0	0	0	0	0	0	0	0
RNH1	0	0	0	0	1	1	1	FALSE	0	0	0	0	6077900	9350400	0	0	0	0
RPL21	0	0	0	0	1	1	1	FALSE	0	0	0	0	0	0	0	0	0	40937000
RPL32	0	0	0	0	1	1	1	FALSE	0	0	0	0	2433100	0	0	0	0	0
RPL35A	0	0	0	0	1	1	1	FALSE	4618400	0	0	0	0	0	0	0	0	0
RPL37A	0	0	0	0	1	1	1	FALSE	0	0	0	0	0	0	0	0	0	29693000
RPL7L1	0	0	0	0	1	1	1	FALSE	4014900	0	4352300	0	4032400	4893600	0	0	0	0
RPRD1A	0	0	0	0	1	1	1	FALSE	2937200	0	0	0	4302400	2936800	0	0	0	0
RPRD2	0	0	0	0	1	1	1	FALSE	1041400	0	1100500	0	972700	953640	892500	0	0	0
RPS19	0	0	0	0	1	1	1	FALSE	0	0	0	0	0	0	0	0	0	866020
RPS25	0	0	0	0	1	1	1	FALSE	2675200	0	2558100	0	2369200	0	4695200	2922900	2296200	0
RRM1	0	0	0	0	1	1	1	FALSE	2875600	0	2332200	0	2324400	0	0	0	0	0
RTF1	0	0	0	0	1	1	1	FALSE	0	0	0	0	0	847440	0	0	0	0
RTFDC1	0	0	0	0	1	1	1	FALSE	0	0	0	0	1600200	0	0	0	0	0
RXRA	0	0	0	0	1	1	1	FALSE	2008200	0	0	0	0	0	0	0	0	0
SAMM50	0	0	0	0	1	1	1	FALSE	3498800	0	0	0	0	0	0	0	0	0
SAP30BP	0	0	0	0	1	1	1	FALSE	890380	0	0	0	0	0	0	0	0	0
SARNP	0	0	0	0	1	1	1	FALSE	0	0	0	0	0	0	0	0	1637600	0
SCFD1	0	0	0	0	1	1	1	FALSE	1908700	0	0	0	3924900	0	0	0	0	0
SCOC	0	0	0	0	1	1	1	FALSE	423910	0	0	0	0	0	0	0	0	0
SEC16B	0	0	0	0	1	1	1	FALSE	0	0	0	0	0	0	0	0	0	0
SEH1L	0	0	0	0	1	1	1	FALSE	0	12978000	0	0	0	0	0	0	0	0
SENP3-EIF4A1	0	0	0	0	1	1	1	FALSE	0	0	0	0	0	0	0	2182800	0	0
SEPT5	0	0	0	0	1	1	1	FALSE	0	406660	0	0	0	0	0	0	0	0
SETX	0	0	0	0	1	1	1	FALSE	0	0	0	0	0	0	0	0	0	0
SF3B4	0	0	0	0	1	1	1	FALSE	0	0	0	0	0	0	0	0	0	0
SIN3A	0	0	0	0	1	1	1	FALSE	0	0	0	1009500	996110	0	0	0	0	0
SKIV2L2	0	0	0	0	1	1	1	FALSE	2929900	0	0	0	0	0	0	0	0	0
SLC25A11	0	0	0	0	1	1	1	FALSE	748530	0	0	0	0	0	0	0	0	0
SLC7A1	0	0	0	0	1	1	1	FALSE	0	0	0	0	0	0	0	0	0	0
SLC9A3R2	0	0	0	0	1	1	1	FALSE	0	0	0	0	0	0	0	0	0	0
SMC4	0	0	0	0	1	1	1	FALSE	0	0	1224400	0	1666500	0	0	0	1005700	0
SMS	0	0	0	0	1	1	1	FALSE	2781100	0	5602100	0	0	0	2326000	0	0	0
SMYD3	0	0	0	0	1	1	1	FALSE	1898400	0	0	0	0	0	0	0	0	0
SNRPA	0	0	0	0	1	1	1	FALSE	0	0	7015100	10524000	7051000	0	0	0	0	0
SNRPF	0	0	0	0	1	1	1	FALSE	0	0	0	0	0	0	0	0	0	0
SNTB2	0	0	0	0	1	1	1	FALSE	529570	0	0	0	0	0	0	0	0	0
SPTBN1	0	0	0	0	1	1	1	FALSE	0	0	0	0	0	0	0	0	0	0
SPTBN2	0	0	0	0	1	1	1	FALSE	0	0	0	0	0	892690	0	0	0	0
SRP54	0	0	0	0	1	1	1	FALSE	2760500	0	0	0	2790300	0	0	0	0	0
SRSF6	0	0	0	0	1	1	1	FALSE	0	0	0	5023500	4313400	0	0	0	0	0
SSBP2	0	0	0	0	1	1	1	FALSE	1659000	0	0	0	0	0	0	0	0	0
SSR4	0	0	0	0	1	1	1	FALSE	5003500	0	0	0	0	0	0	0	0	0
STAT1	0	0	0	0	1	1	1	FALSE	1886100	0	0	0	2084700	0	0	0	0	0
STAU1	0	0	0	0	1	1	1	FALSE	254360	0	0	0	0	0	0	0	0	0
STIM1	0	0	0	0	1	1	1	FALSE	0	0	0	0	801140	0	0	0	0	0
STMN1	0	0	0	0	1	1	1	FALSE	3345000	0	0	0	0	0	0	0	0	0
STRBP	0	0	0	0	1	1	1	FALSE	0	0	3875600	0	0	3759000	4568300	0	0	0
SUMO1	0	0	0	0	1	1	1	FALSE	0	0	0	0	0	0	0	1936500	0	0
SYMPK	0	0	0	0	1	1	1	FALSE	904230	0	0	0	0	0	0	0	0	0
SYNE1	0	0	0	0	1	1	1	FALSE	0	0	0	0	0	0	0	0	0	0
TAGLN2	0	0	0	0	1	1	1	FALSE	0	0	0	0	0	0	427200	0	0	0
TARS	0	0	0	0	1	1	1	FALSE	0	2109100	0	0	0	0	0	0	0	0
TCEB1	0	0	0	0	1	1	1	FALSE	0	0	0	0	0	0	0	0	9272600	0
TFAP4	0	0	0	0	1	1	1	FALSE	580330	0	0	0	0	0	0	0	0	0
TGM3	0	0	0	0	1	1	1	FALSE	0	0	0	2011400	0	0	0	0	0	0
TIMM44	0	0	0	0	1	1	1	FALSE	1148600	0	0	0	0	0	0	0	0	0
TIMM50	0	0	0	0	1	1	1	FALSE	0	0	0	0	1190400	0	0	0	0	0
TIPRL	0	0	0	0	1	1	1	FALSE	1022300	0	0	0	0	0	0	0	0	0
TLE1	0	0	0	0	1	1	1	FALSE	3866400	0	0	0	2553700	0	4337800	0	0	0
TM7SF2	0	0	0	0	1	1	1	FALSE	363810	0	0	0	0	0	0	0	0	0
TM9SF3	0	0	0	0	1	1	1	FALSE	0	309370	0	0	0	0	0	0	0	0
TMA16	0	0	0	0	1	1	1	FALSE	1862400	0	0	0	0	0	0	0	0	0
TNPO3	0	0	0	0	1	1	1	FALSE	1541100	0	2144400	0	1482700	1314300	1645200	0	0	0
TOLLIP	0	0	0	0	1	1	1	FALSE	2928700	0	0	0	2942000	0	0	0	0	0
TOMM34	0	0	0	0	1	1	1	FALSE	2708900	0	0	0	0	0	0	0	0	0
TRAPPC3	0	0	0	0	1	1	1	FALSE	1453700	0	0	0	0	0	0	0	0	0
TRMT1	0	0	0	0	1	1	1	FALSE	0	0	0	0	0	2394900	0	0	0	0
TRMT112	0	0	0	0	1	1	1	FALSE	1183300	0	1770100	0	0	0	0	0	0	0
TRMT1L	0	0	0	0	1	1	1	FALSE	1016200	0	0	0	0	0	0	0	0	0
TTLL7	0	0	0	0	1	1	1	FALSE	0	0	0	0	0	0	0	0	0	0
TUBB4A	0	0	0	0	1	1	1	FALSE	1961400	0	0	0	0	0	0	0	0	0
TWF1	0	0	0	0	1	1	1	FALSE	0	0	0	0	0	0	0	0	1193700	0
TXN	0	0	0	0	1	1	1	FALSE	3716500	0	4069700	20188000	3389000	0	0	0	0	0
TXNRD1	0	0	0	0	1	1	1	FALSE	1180100	0	0	0	0	0	0	0	0	0
UBE2M	0	0	0	0	1	1	1	FALSE	0	3851700	0	0	0	0	0	0	0	0
UFD1L	0	0	0	0	1	1	1	FALSE	2772900	0	0	0	2390900	0	0	2593100	0	0
UFL1	0	0	0	0	1	1	1	FALSE	665200	0	0	0	0	0	0	0	0	0
UNC45A	0	0	0	0	1	1	1	FALSE	1740100	0	0	0	1887600	0	0	0	0	0
UQCRC1	0	0	0	0	1	1	1	FALSE	2134200	0	0	0	0	0	0	0	0	0
UQCRC2	0	0	0	0	1	1	1	FALSE	2528200	0	0	0	0	0	0	0	0	0
USP14	0	0	0	0	1	1	1	FALSE	5906700	0	5457600	0	5106700	0	6422900	6750500	0	0
USP27X	0	0	0	0	1	1	1	FALSE	1320000	0	0	0	0	0	0	0	0	0
UTP14A	0	0	0	0	1	1	1	FALSE	0	0	0	0	0	0	330330	0	0	0
UTP15	0	0	0	0	1	1	1	FALSE	2055900	0	2567300	0	3293200	0	0	0	0	0
UTP18	0	0	0	0	1	1	1	FALSE	1381700	0	0	0	0	0	0	0	0	0
UTRN	0	0	0	0	1	1	1	FALSE	1814800	0	1669400	0	1849400	1523000	1537300	1755800	0	0
VEZF1	0	0	0	0	1	1	1	FALSE	878140	0	0	0	0	0	0	0	0	0
VGLL4	0	0	0	0	1	1	1	FALSE	1501600	0	0	0	0	0	0	0	0	0
VPS26A	0	0	0	0	1	1	1	FALSE	2074200	0	2415600	0	2583700	2299600	2862700	0	0	0
VPS35	0	0	0	0	1	1	1	FALSE	0	0	0	0	1774500	0	0	0	0	0
VPS4B	0	0	0	0	1	1	1	FALSE	0	0	0	0	2121400	2422100	0	2709000	0	0
VRK1	0	0	0	0	1	1	1	FALSE	1290900	0	0	0	0	0	0	0	0	0
VTA1	0	0	0	0	1	1	1	FALSE	5045000	0	0	0	3717800	3674800	3637000	4410900	0	0
WAC	0	0	0	0	1	1	1	FALSE	1583900	0	0	0	0	0	0	0	0	0
WDR26	0	0	0	0	1	1	1	FALSE	0	0	0	0	0	0	0	0	0	0
WDR61	0	0	0	0	1	1	1	FALSE	0	0	0	0	0	0	0	0	0	0
WDR77	0	0	0	0	1	1	1	FALSE	1982200	0	0	0	0	0	0	0	0	0
WDR82	0	0	0	0	1	1	1	FALSE	0	0	0	0	0	0	0	0	0	0
XAB2	0	0	0	0	1	1	1	FALSE	0	0	0	0	0	0	1596400	0	0	0
XPOT	0	0	0	0	1	1	1	FALSE	5270600	0	4020800	0	0	4242700	4094400	0	5251100	0
XRCC1	0	0	0	0	1	1	1	FALSE	546020	0	0	0	0	0	0	0	0	0
YWHAQ	0	0	0	0	1	1	1	FALSE	3141300	0	0	0	0	0	0	0	0	0
ZC3H14	0	0	0	0	1	1	1	FALSE	2103600	0	1641900	0	1550300	0	0	0	0	0
ZC3H4	0	0	0	0	1	1	1	FALSE	1824100	0	2053400	0	0	0	0	0	0	0
ZC3HAV1L	0	0	0	0	1	1	1	FALSE	1071300	0	0	0	0	0	0	0	0	0
ZCCHC8	0	0	0	0	1	1	1	FALSE	550410	0	0	0	0	0	0	0	0	0
ZCWPW2	0	0	0	0	1	1	1	FALSE	0	0	0	0	0	0	0	0	0	0
ZCWPW2	0	0	0	0	1	1	1	FALSE	0	0	0	0	0	0	0	0	0	0
ZEB1	0	0	0	0	1	1	1	FALSE	0	0	0	0	0	0	0	0	0	0
ZNF211	0	0	0	0	1	1	1	FALSE	0	0	0	0	0	0	0	0	0	0
ZNF24	0	0	0	0	1	1	1	FALSE	0	0	2552400	1763000	0	0	0	0	0	0
ZNF384	0	0	0	0	1	1	1	FALSE	0	0	0	0	0	0	3299900	0	0	0
ZNF502	0	0	0	0	1	1	1	FALSE	0	0	0	0	0	0	0	0	0	0
ZNF512	0	0	0	0	1	1	1	FALSE	427520	0	0	0	0	0	0	0	0	0
ZNF598	0	0	0	0	1	1	1	FALSE	0	0	0	0	0	0	0	0	0	0
ZNF622	0	0	0	0	1	1	1	FALSE	277980	0	0	0	0	0	0	0	0	0
ZNF626	0	0	0	0	1	1	1	FALSE	0	0	0	0	0	0	0	0	0	0
ZW10	0	0	0	0	1	1	1	FALSE	484900	0	0	0	0	0	0	0	0	0
CSTF1	21547000	14856000	18260000	18281000	1.18001	0.812647	0.996329	FALSE	21607000	14391000	26425000	12691000	22657000	16822000	17856000	23168000	18793000	10285000
EIF2AK2	1794500	1511200	1563400	1807100	1.14782	0.836257	0.992038	FALSE	0	0	0	0	1741100	0	1909900	0	0	0
PSME3	60766000	36175000	55954000	40311000	1.086	0.897398	0.991698	FALSE	63230000	47153000	83975000	40468000	42466000	81258000	81974000	55618000	62490000	46432000
ZC3H15	1312900	0	1335900	0	0.982783	1	0.991392	FALSE	1504700	0	0	0	1625500	0	1274300	0	0	0
RBM15B	0	2263900	0	2305500	1	0.981956	0.990978	FALSE	0	0	2713600	0	2360000	2800400	0	2112300	2665800	0
HSPA4	2069100	0	2107400	0	0.981826	1	0.990913	FALSE	1981200	0	2160600	2325100	2394300	1973100	0	0	0	0
LUC7L2	2197900	0	2243500	0	0.979675	1	0.989837	FALSE	1997500	0	3796300	0	0	2208200	1994300	1700100	2420800	0
ARPC1A	4837700	2246400	3378000	4140400	1.43212	0.542556	0.987338	FALSE	4969600	3506000	3118300	2535500	3388800	3004100	3403800	3690600	3063000	3242900
RPA3	8175100	6693100	7927800	7134500	1.03119	0.938132	0.984663	FALSE	9057900	6732600	9240500	7533700	12322000	6337900	8204100	8735100	6684500	0
PCBP1	4298600	3052700	4823200	2841800	0.891234	1.07421	0.982724	FALSE	3500100	2990400	4472100	5828800	7780100	5663800	4220800	3529900	3526200	0
PABPN1	7673000	0	7965800	0	0.963243	1	0.981621	FALSE	6765300	5196100	8503300	4037200	7929800	6452600	8438600	0	6104900	0
ADAR	2211500	0	2363000	0	0.935887	1	0.967943	FALSE	2500900	0	2215000	0	2475100	3423300	0	2414500	0	0
CDK1	12278000	10885000	11120000	13115000	1.10414	0.829966	0.967051	FALSE	12409000	17993000	17974000	14210000	13420000	14965000	13925000	11796000	17720000	13153000
LRRC59	5046300	0	5412000	0	0.932428	1	0.966214	FALSE	5883300	0	6744700	0	7370500	5035400	4798900	5858000	4728500	0
APRT	3203700	0	3447500	0	0.929282	1	0.964641	FALSE	4580700	0	0	0	2833100	0	3680100	0	3428300	0
NCOA2	3427700	0	3815000	0	0.89848	1	0.94924	FALSE	6104100	0	4860300	3579700	3547900	4117300	3278000	0	4395300	0
GARS	2710600	1575500	2151500	2476000	1.25987	0.636309	0.948087	FALSE	1924900	3146100	1696100	1314100	1695200	1739600	2636600	2121500	2098600	0
HLTF	4647400	6065700	4625100	6815500	1.00482	0.889986	0.947404	FALSE	3443600	4801100	4158500	0	4400600	4053000	4828400	0	4824500	0
FLYWCH2	2224700	0	2498200	0	0.890521	1	0.945261	FALSE	2817900	0	2283400	1996200	2275700	2325500	2370300	0	2681500	0
PRPF4	7457200	5000600	6671600	6533900	1.11775	0.765332	0.941542	FALSE	6698300	5743100	7447600	5761000	6368000	6629300	5083500	5798400	5889800	5538600
DDX46	7356400	6378100	8160300	6523900	0.901486	0.977651	0.939569	FALSE	7273600	7890100	6333100	9511300	7167200	6891400	8007100	5217600	7479800	0
DDX42	5670200	4731300	6907700	4481100	0.820852	1.05583	0.938343	FALSE	8240300	4455300	8091600	6039500	8307200	7768000	7612500	5664100	6654900	4963400
PSMC3	1284200	0	1464900	0	0.876647	1	0.938323	FALSE	1506100	0	2512200	0	1680300	0	1681400	1578500	0	0
PCIF1	2245800	0	2567500	0	0.874703	1	0.937352	FALSE	2058500	0	2107100	0	2212000	0	2420100	0	0	0
CACYBP	8498600	13478000	21379000	9142100	0.397521	1.47428	0.9359	FALSE	15105000	0	13241000	10023000	13400000	12108000	10011000	9890000	10038000	0
STUB1	3066600	2195100	3006600	2577400	1.01996	0.851672	0.935814	FALSE	3788100	0	4404000	1475200	3891700	2544900	2481100	2018400	2559100	0
TBCA	7913700	4590100	7442200	5776200	1.06335	0.794657	0.929006	FALSE	11289000	6296100	11875000	4467100	8637400	9274200	9277600	6288100	9231300	6913900
YLPM1	7653800	6794300	9628800	6391000	0.794886	1.0631	0.928995	FALSE	10138000	8752000	9380100	7662200	7516900	11705000	8921900	8674700	9733500	0
GTF2B	11413000	6966000	8756400	12586000	1.30339	0.553472	0.928431	FALSE	5233000	11296000	5972800	7470300	4961600	6745600	8344900	9499700	7955000	8958300
PPP2R2A	5133400	0	6044800	0	0.849226	1	0.924613	FALSE	6590300	0	6618800	5788900	7011300	5475600	5398300	6329800	0	0
SEC23B	3028800	0	3602200	0	0.84082	1	0.92041	FALSE	4785500	2906000	0	0	3059600	0	3226200	2633200	3952600	2850800
APEH	0	1378100	0	1646400	1	0.837038	0.918519	FALSE	0	0	0	1462200	0	1097900	1484700	0	0	1572400
RBM25	4596800	0	5687900	0	0.808172	1	0.904086	FALSE	7196700	0	6145700	0	5470900	5297600	5021500	0	5106700	0
PFKL	3264800	2528500	3547200	2856600	0.920388	0.885143	0.902766	FALSE	3898600	3209700	0	2962200	3734700	2556000	3706900	5259500	0	0
XPO1	9081000	7030300	11796000	7128200	0.769837	0.986266	0.878052	FALSE	17109000	0	11076000	7456800	15435000	10081000	11338000	9665400	8514300	6668200
RNF20	13929000	7905900	14589000	9893500	0.95476	0.7991	0.87693	FALSE	16263000	10180000	24926000	4522800	14712000	15415000	11095000	13464000	11969000	0
CSDE1	5933700	5750200	7360500	6071200	0.806154	0.947127	0.876641	FALSE	6396700	8094400	5557500	6297100	7063300	5099200	10573000	5763100	5878300	5659400
PSMA6	8894700	8923800	12634000	8601600	0.704029	1.03746	0.870743	FALSE	12459000	8512500	18003000	17755000	8256200	9221100	11002000	12414000	15237000	12945000
TOP2B	7344300	6636200	7929300	8225200	0.926223	0.806813	0.866518	FALSE	7408100	0	8303700	0	8814300	5719600	7607400	7979300	7139800	0
PSMA5	11208000	0	15418000	0	0.726943	1	0.863471	FALSE	11432000	12669000	11736000	17611000	11948000	11002000	12063000	20471000	12083000	0
DAK	3758700	0	5261000	0	0.714446	1	0.857223	FALSE	4465400	5151300	5417300	5011700	4576500	5713700	4668700	4366400	0	0
GDI2	3499800	3711700	4767900	3823400	0.734034	0.970785	0.85241	FALSE	3529600	2581200	3962800	3308300	4728400	3987900	3458200	4935600	3057100	0
CRNKL1	2687400	2252200	2889800	2913900	0.929961	0.772916	0.851438	FALSE	2682900	0	3922700	0	5397400	3083200	0	1929200	3348200	0
PFDN2	4722000	4549400	7358600	4314100	0.641698	1.05454	0.84812	FALSE	6682100	5933300	6031600	0	3526600	4179700	7029700	7717400	4790300	4407900
PEBP1	17610000	0	25503000	0	0.690507	1	0.845254	FALSE	18487000	0	13900000	17930000	13830000	13947000	21092000	23338000	13626000	9868400
BTF3	10325000	6503300	9652400	10519000	1.06968	0.618243	0.843963	FALSE	7931500	12671000	8763000	0	11391000	7839400	9190500	10918000	7863500	9558600
RCC1	5740700	8428800	8195300	8610800	0.700487	0.978864	0.839675	FALSE	8734000	0	12835000	0	11122000	8532000	15926000	5941700	10921000	0
EIF3D	7094800	8133000	7892400	10433000	0.898941	0.779546	0.839243	FALSE	0	8145000	7444500	0	0	0	0	0	0	0
FARSA	5530700	3586300	5875900	4874900	0.941252	0.735666	0.838459	FALSE	4489400	4089700	6062800	4474000	7632400	3733000	4911800	7123400	4029500	0
SART3	3062000	0	4628200	0	0.661596	1	0.830798	FALSE	3977900	0	6519600	0	7209800	6772500	4058200	3306600	7090400	0
VBP1	2498100	0	3850100	0	0.64884	1	0.82442	FALSE	1397900	2169200	1520800	2411300	1422500	0	1827700	2335100	1288500	2588200
CHTF8	3335500	9735800	4663800	10466000	0.715189	0.930231	0.82271	FALSE	0	7493100	0	0	0	3443700	3412100	0	3886500	20068000
PCYT1A	3223100	3170500	4874400	3237300	0.66123	0.979366	0.820298	FALSE	3941200	2137200	6172800	3106100	3107600	3953400	2880400	4445500	2958400	1469600
CALD1	2166600	1637100	2792400	1894000	0.775892	0.864361	0.820126	FALSE	2746100	2012900	2616700	1464800	0	0	2803400	2126900	2897700	2044700
BCOR	17755000	14101000	16073000	27384000	1.10465	0.514936	0.809792	FALSE	14005000	15209000	13437000	12034000	10010000	14922000	13078000	12686000	13940000	15287000
RTCA	3125900	2713200	4410800	3125700	0.708692	0.86803	0.788361	FALSE	2335300	0	3141400	0	3687800	3482900	2323300	2131700	3536800	0
ERF	9349500	19631000	16275000	19998000	0.57447	0.981648	0.778059	FALSE	10293000	23868000	16058000	15423000	9168700	17896000	17191000	8526800	16683000	28232000
KATNB1	45858000	62312000	57761000	84945000	0.793927	0.733557	0.763742	FALSE	31328000	85103000	36113000	47787000	22262000	47998000	50930000	66611000	49784000	96016000
CNOT1	6384200	5041500	7036900	8300500	0.907246	0.607373	0.75731	FALSE	6271200	8835800	4823100	5163500	5697900	4032100	5280200	5742200	5278700	7570100
COPS7A	27208000	27702000	37210000	40085000	0.731201	0.691081	0.711141	FALSE	24987000	33835000	26410000	22557000	43321000	23837000	35416000	41031000	34688000	41767000
EVPL	1713600	1578500	2952100	1920100	0.580468	0.822093	0.70128	FALSE	1609200	2149400	1692000	0	1684500	1790300	1994400	1595900	1820200	1593000
RBFOX2	6386000	3528200	5791900	12089000	1.10257	0.291852	0.697213	FALSE	2960900	6212800	4114700	0	3990200	4738900	4243800	4320600	5568700	9906300
RPL18A	7987100	0	6045600	6242900	1.32114	1.60182e-07	0.660571	FALSE	5776300	6172300	4816300	0	5409500	5984500	6022500	6009300	5610500	5993000
ATP6V1B2	5082100	9952100	8055000	14503000	0.630925	0.68621	0.658567	FALSE	8190000	12919000	9412900	8692000	10066000	8680300	7800800	12575000	12618000	13894000
KTN1	4098500	3313400	7623600	4336100	0.537607	0.764143	0.650875	FALSE	7097100	7835900	6769200	4585800	10455000	5143500	2966000	3895700	4411300	4795300
RNF40	5104800	2420000	6753200	4586000	0.755908	0.527693	0.641801	FALSE	5648900	0	6843500	4879400	5709300	5512200	5649100	2678800	4977600	0
PDIA3	2766400	0	2201600	2074100	1.25654	4.82137e-07	0.628271	FALSE	1942400	0	3852100	0	2351800	2641800	2106500	2641600	0	0
GYS1	27705000	14102000	37709000	27553000	0.734705	0.511814	0.623259	FALSE	36496000	26762000	27937000	35955000	31936000	25986000	30180000	33092000	21650000	17674000
UBAP2L	7856600	4896100	11182000	9101800	0.702611	0.537927	0.620269	FALSE	6211100	8394100	6804900	5053300	8068000	4927000	10090000	7131000	6328300	11052000
CDC5L	5082700	0	4140300	4096500	1.22762	2.44111e-07	0.613808	FALSE	4710500	0	6782400	0	4906900	4010600	3561400	0	0	0
BPNT1	0	2293100	1907900	1872800	5.24136e-07	1.22442	0.612212	FALSE	2304900	2127800	2169100	1968400	3025500	2022900	2073300	0	2051900	0
RPS27	5693500	0	4652700	4156800	1.2237	2.4057e-07	0.611849	FALSE	3706800	5516900	1830800	0	2486500	0	3978300	0	4565200	0
SON	2553000	0	2176400	2734700	1.17304	3.65671e-07	0.586519	FALSE	3234300	2684000	2930000	0	4048600	2896300	2077600	0	2727900	2590800
HNRNPLL	2870400	0	2454500	2609000	1.16944	3.83288e-07	0.584722	FALSE	1926100	0	4245900	3138000	3011300	3632300	2985400	0	2747400	0
SOGA1	23150000	13839000	28123000	41928000	0.82317	0.330066	0.576618	FALSE	19771000	24285000	18677000	19300000	14370000	29294000	23020000	31337000	25244000	26747000
JUNB	14780000	9812400	18621000	27755000	0.793728	0.353536	0.573632	FALSE	10244000	17583000	7570100	7500400	10676000	8271800	11499000	14590000	12560000	17439000
TP53BP1	6037600	4897100	10370000	8873700	0.582218	0.551867	0.567042	FALSE	7418200	7547700	6780700	0	5179200	7204900	6566900	7040400	7164500	6165100
ZNF207	10566000	0	9767300	12774000	1.08177	7.8284e-08	0.540886	FALSE	0	9831800	14961000	14429000	9974100	13819000	10772000	8410500	11234000	7132400
NXF1	0	1856300	1906200	1731100	5.24604e-07	1.07232	0.536162	FALSE	1984600	0	2101900	1563400	1794900	1699000	1474700	1977100	1455000	0
DIS3	0	3239400	2808700	3033400	3.56036e-07	1.06791	0.533955	FALSE	4233000	0	3192700	3460500	3698700	3563000	4744500	2690400	3946100	0
SF3B2	7825700	0	7470800	6056800	1.0475	1.65104e-07	0.523753	FALSE	8487400	7241100	13489000	10314000	9722800	9189000	8051300	6116000	7336500	6316400
GIPC1	8413700	16287000	24994000	23348000	0.336629	0.697576	0.517102	FALSE	22008000	11341000	19167000	25394000	5711800	18644000	17271000	15660000	31333000	31654000
GBE1	4233600	0	4096900	3444200	1.03337	2.90343e-07	0.516683	FALSE	5228200	3012900	5529600	2736400	5625100	4492200	5922400	2414900	4488700	0
EMD	2155500	0	2109900	2672500	1.02161	3.74181e-07	0.510806	FALSE	2505700	0	2349200	2141600	3615900	2916100	3040000	3126800	3179200	0
PDCD6IP	6495200	4549800	9774500	12796000	0.664505	0.355564	0.510034	FALSE	9466400	0	6725500	7022500	9150900	6240900	9082000	9920500	8433900	8557600
ATP6V1C1	0	0	162880	0	6.13945e-06	1	0.500003	FALSE	0	0	0	0	0	0	0	0	0	0
TAB1	0	0	0	190180	1	5.25815e-06	0.500003	FALSE	0	0	0	0	0	0	0	0	0	0
HADH	0	0	0	192010	1	5.20803e-06	0.500003	FALSE	0	0	0	0	0	0	0	0	0	0
ZNF609	0	0	0	219670	1	4.55226e-06	0.500002	FALSE	0	0	0	0	0	0	0	0	0	0
SCRN3	0	0	223210	0	4.48007e-06	1	0.500002	FALSE	0	0	0	0	0	0	0	0	0	0
LONP2	0	0	0	231910	1	4.312e-06	0.500002	FALSE	0	0	0	0	0	0	0	0	0	0
PGP	0	0	0	247870	1	4.03436e-06	0.500002	FALSE	0	0	0	0	0	0	0	0	0	0
KRT6A	0	0	0	250390	1	3.99375e-06	0.500002	FALSE	0	0	0	0	0	0	0	0	0	0
STK3	0	0	251520	0	3.97581e-06	1	0.500002	FALSE	0	0	0	0	0	0	0	0	0	0
PHKA1	0	0	252630	0	3.95834e-06	1	0.500002	FALSE	0	0	0	0	0	0	0	0	0	0
DCTN5	0	0	255730	0	3.91036e-06	1	0.500002	FALSE	0	0	0	0	0	0	0	0	0	0
TLK2	0	0	261260	0	3.82759e-06	1	0.500002	FALSE	0	0	0	0	0	0	0	0	0	0
GRPEL1	0	0	264130	0	3.786e-06	1	0.500002	FALSE	0	0	0	0	0	0	0	0	0	0
CBFB	0	0	277490	0	3.60372e-06	1	0.500002	FALSE	0	0	0	0	0	0	0	0	0	0
NIT2	0	0	278430	0	3.59155e-06	1	0.500002	FALSE	0	0	0	0	0	0	0	0	0	0
ARL6IP4	0	0	0	281810	1	3.54848e-06	0.500002	FALSE	0	0	0	0	0	0	0	0	0	0
DYNLT1	0	0	0	292230	1	3.42195e-06	0.500002	FALSE	0	0	0	0	0	0	0	0	0	0
PCMT1	0	0	0	300930	1	3.32302e-06	0.500002	FALSE	0	0	0	0	0	0	0	0	0	0
FMR1	0	0	0	302550	1	3.30523e-06	0.500002	FALSE	0	0	0	0	0	0	0	0	0	0
AHDC1	0	0	302610	0	3.30457e-06	1	0.500002	FALSE	0	0	0	0	0	0	0	0	0	0
PSME1	0	0	0	305070	1	3.27793e-06	0.500002	FALSE	0	0	0	0	0	0	0	0	0	0
XIAP	0	0	0	310360	1	3.22205e-06	0.500002	FALSE	0	0	0	0	0	0	0	0	0	0
IPO5	0	0	0	313070	1	3.19416e-06	0.500002	FALSE	0	0	0	0	0	0	0	0	0	0
LYAR	0	0	0	323850	1	3.08784e-06	0.500002	FALSE	0	0	0	0	0	0	0	0	0	0
DPCD	0	0	333390	0	2.99948e-06	1	0.500001	FALSE	0	0	0	0	0	0	0	0	0	0
DHX38	0	0	0	353990	1	2.82493e-06	0.500001	FALSE	0	0	0	0	0	0	0	0	0	0
MBD3	0	0	0	359290	1	2.78326e-06	0.500001	FALSE	0	0	0	0	0	0	0	0	0	0
STAMBP	0	0	370500	0	2.69905e-06	1	0.500001	FALSE	0	0	0	0	0	0	0	0	0	0
KIF1BP	0	0	0	373050	1	2.6806e-06	0.500001	FALSE	0	0	0	0	0	0	0	0	0	0
ECHS1	0	0	393180	0	2.54336e-06	1	0.500001	FALSE	0	0	0	0	0	0	0	0	0	0
CTNNBL1	0	0	401990	0	2.48762e-06	1	0.500001	FALSE	0	0	0	0	0	0	0	0	0	0
POLD3	0	0	0	411100	1	2.43249e-06	0.500001	FALSE	0	0	0	0	0	0	0	0	0	0
MDH1	0	0	414520	0	2.41242e-06	1	0.500001	FALSE	0	0	0	0	0	0	0	0	0	0
GTF2A1	0	0	429460	0	2.3285e-06	1	0.500001	FALSE	0	0	0	0	0	0	0	0	0	0
MED20	0	0	433390	0	2.30739e-06	1	0.500001	FALSE	0	0	0	0	0	0	0	0	0	0
GCA	0	0	439880	0	2.27334e-06	1	0.500001	FALSE	0	0	0	0	0	0	0	0	0	0
HOXC13	0	0	453840	0	2.20341e-06	1	0.500001	FALSE	0	0	0	0	0	0	0	0	0	0
HDGFRP2	0	0	0	484850	1	2.06249e-06	0.500001	FALSE	0	0	0	0	0	0	0	0	0	0
DDX50	0	0	0	486290	1	2.05638e-06	0.500001	FALSE	0	0	0	0	0	0	0	0	0	0
BARD1	0	0	0	508540	1	1.96641e-06	0.500001	FALSE	0	0	0	0	0	0	0	0	0	0
PMVK	0	0	512710	0	1.95042e-06	1	0.500001	FALSE	0	0	0	0	0	0	0	0	0	0
TK1	0	0	0	513440	1	1.94764e-06	0.500001	FALSE	0	0	0	0	0	0	0	0	0	0
SMARCAL1	0	0	518810	0	1.92748e-06	1	0.500001	FALSE	0	0	0	0	0	0	0	0	0	0
PCM1	0	0	0	518890	1	1.92719e-06	0.500001	FALSE	0	0	0	0	0	0	0	0	0	0
USP9X	0	0	0	521090	1	1.91905e-06	0.500001	FALSE	0	0	0	0	0	0	0	0	0	0
PSMB2	0	0	0	526840	1	1.89811e-06	0.500001	FALSE	0	0	0	0	0	0	0	0	0	0
SLC4A1AP	0	0	528320	0	1.89279e-06	1	0.500001	FALSE	0	0	0	0	0	0	0	0	0	0
CWF19L2	0	0	0	528870	1	1.89082e-06	0.500001	FALSE	0	0	0	0	0	0	0	0	0	0
PREB	0	0	553060	0	1.80812e-06	1	0.500001	FALSE	0	0	0	0	0	0	0	0	0	0
MRPS7	0	0	553450	0	1.80684e-06	1	0.500001	FALSE	0	0	0	0	0	0	0	0	0	0
SRI	0	0	564860	0	1.77035e-06	1	0.500001	FALSE	0	0	0	0	0	0	0	0	0	0
NUDT16	0	0	574380	0	1.741e-06	1	0.500001	FALSE	0	0	0	0	0	0	0	0	0	0
DCTN2	0	0	579140	0	1.7267e-06	1	0.500001	FALSE	0	0	0	0	0	0	0	0	0	0
CCNH	0	0	598600	0	1.67056e-06	1	0.500001	FALSE	0	0	0	0	0	0	0	0	0	0
EYA3	0	0	604530	0	1.65417e-06	1	0.500001	FALSE	0	0	0	0	0	0	0	0	0	0
ARF5	0	0	0	610730	1	1.63738e-06	0.500001	FALSE	0	0	0	0	0	0	0	0	0	0
NSRP1	0	0	614240	0	1.62803e-06	1	0.500001	FALSE	0	0	0	0	0	0	0	0	0	0
TBCD	0	0	0	625540	1	1.59862e-06	0.500001	FALSE	0	0	0	0	0	0	0	0	0	0
SEPHS1	0	0	638970	0	1.56502e-06	1	0.500001	FALSE	0	0	0	0	0	0	0	0	0	0
GINS4	0	0	655090	0	1.52651e-06	1	0.500001	FALSE	0	0	0	0	0	0	0	0	0	0
PAXIP1	0	0	664070	0	1.50586e-06	1	0.500001	FALSE	0	0	0	0	0	0	0	0	0	0
DHX40	0	0	0	668400	1	1.49611e-06	0.500001	FALSE	0	0	0	0	0	0	0	0	0	0
NUDCD2	0	0	671730	0	1.48869e-06	1	0.500001	FALSE	0	0	0	0	0	0	0	0	0	0
TRIM68	0	0	710980	0	1.40651e-06	1	0.500001	FALSE	0	0	0	0	0	0	0	0	0	0
MYLK	0	0	724360	0	1.38053e-06	1	0.500001	FALSE	0	0	0	0	0	0	0	0	0	0
SHARPIN	0	0	0	740680	1	1.35011e-06	0.500001	FALSE	0	0	0	0	0	0	0	0	0	0
ZYX	0	0	0	761130	1	1.31383e-06	0.500001	FALSE	0	0	0	0	0	0	0	0	0	0
RNF113A	0	0	762090	0	1.31218e-06	1	0.500001	FALSE	0	0	0	0	0	0	0	0	0	0
PGAM2	0	0	767250	0	1.30335e-06	1	0.500001	FALSE	0	0	0	0	0	0	0	0	0	0
NELFB	0	0	775820	0	1.28896e-06	1	0.500001	FALSE	0	0	0	0	0	0	0	0	0	0
SLFN5	0	0	778600	0	1.28435e-06	1	0.500001	FALSE	0	0	0	0	0	0	0	0	0	0
IGSF21	0	0	0	788400	1	1.26839e-06	0.500001	FALSE	0	0	0	0	0	0	0	0	0	0
EP300	0	0	794210	0	1.25911e-06	1	0.500001	FALSE	1143300	0	0	0	941810	976570	629770	0	0	0
APTX	0	0	811020	0	1.23301e-06	1	0.500001	FALSE	0	0	0	0	0	0	0	0	0	0
RBM7	0	0	0	814820	1	1.22726e-06	0.500001	FALSE	0	0	0	0	0	0	0	0	0	0
LTA4H	0	0	820820	0	1.21829e-06	1	0.500001	FALSE	0	0	0	0	0	0	0	0	0	0
GALK2	0	0	0	830070	1	1.20472e-06	0.500001	FALSE	0	0	0	0	0	0	0	0	0	0
PSMB6	0	0	0	836840	1	1.19497e-06	0.500001	FALSE	0	0	0	0	0	0	0	0	0	0
REPIN1	0	0	853160	0	1.17211e-06	1	0.500001	FALSE	0	0	0	0	0	0	0	0	0	0
FKBP1A	0	0	864640	0	1.15655e-06	1	0.500001	FALSE	0	0	0	0	0	0	0	0	0	0
GATAD2A	0	0	0	877880	1	1.13911e-06	0.500001	FALSE	0	0	0	0	0	0	0	0	0	0
SSBP1	0	0	880560	0	1.13564e-06	1	0.500001	FALSE	0	0	0	0	0	0	0	0	0	0
WDR18	0	0	0	881780	1	1.13407e-06	0.500001	FALSE	0	0	0	0	0	0	0	0	0	0
CLTA	0	0	903460	0	1.10685e-06	1	0.500001	FALSE	0	0	0	0	0	0	0	0	0	0
BCAP31	0	0	0	917700	1	1.08968e-06	0.500001	FALSE	0	0	0	0	0	0	0	0	0	0
SRR	0	0	0	917770	1	1.0896e-06	0.500001	FALSE	0	0	0	0	0	0	0	0	0	0
PARK7	0	0	933120	0	1.07167e-06	1	0.500001	FALSE	0	0	0	0	0	0	0	0	0	0
SETDB1	0	0	0	946570	1	1.05644e-06	0.500001	FALSE	0	0	0	0	0	0	0	0	0	0
CRIP2	0	0	0	950200	1	1.05241e-06	0.500001	FALSE	0	0	0	0	0	0	0	0	0	0
WDR33	0	0	962450	0	1.03901e-06	1	0.500001	FALSE	0	0	0	0	0	0	0	0	0	0
LSM3	0	0	1009900	0	9.90196e-07	1	0.5	FALSE	0	0	0	0	0	0	0	0	0	0
PCF11	0	0	1020100	0	9.80295e-07	1	0.5	FALSE	0	0	0	0	0	0	0	0	0	0
MED27	0	0	1022500	0	9.77994e-07	1	0.5	FALSE	0	0	0	0	0	0	0	0	0	0
CORO1B	0	0	0	1034700	1	9.66463e-07	0.5	FALSE	0	0	0	0	0	0	0	0	0	0
ZNF503	0	0	0	1037500	1	9.63854e-07	0.5	FALSE	0	0	0	0	0	0	0	0	0	0
CELF1	0	0	1044400	0	9.57487e-07	1	0.5	FALSE	0	0	0	0	0	0	0	0	0	0
NUP214	0	0	0	1072400	1	9.32487e-07	0.5	FALSE	0	0	0	0	0	0	0	0	0	0
AKAP8	0	0	1075000	0	9.30232e-07	1	0.5	FALSE	0	0	0	0	0	0	0	0	0	0
HN1	0	0	1077500	0	9.28073e-07	1	0.5	FALSE	0	0	0	0	0	0	0	0	0	0
CAPRIN1	0	0	1085400	0	9.21318e-07	1	0.5	FALSE	0	0	0	0	0	0	0	0	0	0
SPTLC1	0	0	1099400	0	9.09586e-07	1	0.5	FALSE	0	0	0	0	0	0	0	0	0	0
MAGEC3	0	0	1121700	0	8.91503e-07	1	0.5	FALSE	0	0	0	0	0	0	0	0	0	0
GTF2E1	0	0	1145100	0	8.73285e-07	1	0.5	FALSE	0	0	0	0	0	0	0	0	0	0
GSK3B	0	0	0	1156200	1	8.64902e-07	0.5	FALSE	0	0	0	0	0	0	0	0	0	0
PSMB3	0	0	1160000	0	8.62068e-07	1	0.5	FALSE	0	0	0	0	0	0	0	0	0	0
LENG8	0	0	0	1162100	1	8.6051e-07	0.5	FALSE	0	0	0	0	0	0	0	0	0	0
CXorf56	0	0	0	1182700	1	8.45522e-07	0.5	FALSE	0	0	0	0	0	0	0	0	0	0
OAS3	0	0	0	1184900	1	8.43952e-07	0.5	FALSE	0	0	0	0	0	0	0	0	0	0
ARF4	0	0	1205400	0	8.29599e-07	1	0.5	FALSE	2042300	0	1606500	3644200	1197200	1438900	1712800	2377200	0	0
MRPL19	0	0	1212500	0	8.24742e-07	1	0.5	FALSE	0	0	0	0	0	0	0	0	0	0
CDH1	0	0	1236700	0	8.08603e-07	1	0.5	FALSE	0	0	0	0	0	0	0	0	0	0
SIRT6	0	0	1267000	0	7.89265e-07	1	0.5	FALSE	0	0	0	0	0	0	0	0	0	0
ANXA11	0	0	1288300	0	7.76216e-07	1	0.5	FALSE	0	0	0	0	0	0	0	0	0	0
YY1	0	0	0	1290600	1	7.74833e-07	0.5	FALSE	0	0	0	0	0	0	0	0	0	0
LIMD1	0	0	1335600	0	7.48727e-07	1	0.5	FALSE	0	0	0	0	0	0	0	0	0	0
TRAF4	0	0	0	1335700	1	7.48671e-07	0.5	FALSE	0	0	0	0	0	0	0	0	0	0
TOE1	0	0	0	1358800	1	7.35943e-07	0.5	FALSE	0	0	0	0	0	0	0	0	0	0
DECR1	0	0	1365000	0	7.326e-07	1	0.5	FALSE	0	0	0	0	0	0	0	0	0	0
SDSL	0	0	1390700	0	7.19062e-07	1	0.5	FALSE	0	0	0	0	0	0	0	0	0	0
C1orf123	0	0	1390800	0	7.1901e-07	1	0.5	FALSE	0	0	0	0	0	0	0	0	0	0
PPP2R4	0	0	1391100	0	7.18855e-07	1	0.5	FALSE	0	0	0	0	0	0	0	0	0	0
KMT2D	0	0	0	1403100	1	7.12707e-07	0.5	FALSE	1202400	0	1292400	1280800	1253400	0	0	0	1175100	0
USP54	0	0	0	1483900	1	6.73899e-07	0.5	FALSE	0	0	0	0	0	0	0	0	0	0
HAS1	0	0	1486300	0	6.72811e-07	1	0.5	FALSE	0	0	0	0	0	0	0	0	0	0
ABCF3	0	0	0	1490000	1	6.7114e-07	0.5	FALSE	0	0	0	0	0	0	0	0	0	0
STAP2	0	0	0	1497500	1	6.67779e-07	0.5	FALSE	0	0	0	0	0	0	0	0	0	0
RSL24D1	0	0	1500800	0	6.66311e-07	1	0.5	FALSE	0	0	0	0	0	0	0	0	0	0
WDR36	0	0	1529400	0	6.53851e-07	1	0.5	FALSE	0	0	0	0	2058400	0	0	0	0	0
FH	0	0	1551300	0	6.4462e-07	1	0.5	FALSE	0	0	4770300	0	4007200	1603400	1478800	0	1456300	0
RBM12B	0	0	1570500	0	6.36739e-07	1	0.5	FALSE	0	0	0	0	0	0	0	0	0	0
NBN	0	0	1575100	0	6.3488e-07	1	0.5	FALSE	0	0	0	0	0	0	0	0	0	0
RCOR3	0	0	1616900	0	6.18467e-07	1	0.5	FALSE	0	0	0	0	0	0	0	0	0	0
TMEM109	0	0	1618600	0	6.17817e-07	1	0.5	FALSE	0	0	0	0	0	0	0	0	0	0
EIF3M	0	0	0	1643900	1	6.08309e-07	0.5	FALSE	0	0	0	0	0	0	0	0	0	0
NOP16	0	0	1648900	0	6.06465e-07	1	0.5	FALSE	0	0	0	0	0	0	0	0	0	0
SMNDC1	0	0	1655000	0	6.04229e-07	1	0.5	FALSE	0	0	0	0	0	0	0	0	0	0
SRP9	0	0	0	1661600	1	6.01829e-07	0.5	FALSE	0	0	0	0	0	0	0	0	0	0
SEC13	0	0	0	1669600	1	5.98945e-07	0.5	FALSE	0	0	0	0	0	0	0	0	0	0
CSNK1D	0	0	0	1673100	1	5.97693e-07	0.5	FALSE	0	0	0	0	0	0	0	0	0	0
WDR55	0	0	0	1675400	1	5.96872e-07	0.5	FALSE	0	0	0	0	0	0	0	0	0	0
PAFAH1B1	0	0	1737900	0	5.75407e-07	1	0.5	FALSE	0	0	0	0	0	0	0	0	0	0
TRIM23	0	0	0	1739300	1	5.74944e-07	0.5	FALSE	0	0	0	0	0	0	0	0	0	0
INTS1	0	0	1815700	0	5.50751e-07	1	0.5	FALSE	0	0	0	0	0	0	0	0	0	0
PPP3CA	0	0	1841800	0	5.42947e-07	1	0.5	FALSE	0	0	0	0	0	0	0	0	0	0
PPIL1	0	0	1910300	0	5.23478e-07	1	0.5	FALSE	0	0	0	0	0	0	0	0	0	0
SEL1L	0	0	0	1987700	1	5.03094e-07	0.5	FALSE	0	0	0	0	0	0	0	0	0	0
PPP2CA	0	0	0	1998400	1	5.004e-07	0.5	FALSE	0	0	0	0	0	0	0	0	0	0
VAPA	0	0	2002900	0	4.99276e-07	1	0.5	FALSE	0	0	0	0	0	0	0	0	0	0
RBM33	0	0	2050700	0	4.87638e-07	1	0.5	FALSE	0	0	0	0	0	0	0	0	0	0
PFDN1	0	0	2089500	0	4.78583e-07	1	0.5	FALSE	0	0	0	0	0	0	0	0	0	0
CCDC6	0	0	0	2120500	1	4.71587e-07	0.5	FALSE	0	0	0	0	0	0	0	0	0	0
PCBP2	0	0	2121800	0	4.71298e-07	1	0.5	FALSE	0	0	0	0	0	0	0	0	0	0
CIAPIN1	0	0	2155900	0	4.63843e-07	1	0.5	FALSE	0	0	0	0	0	0	0	0	0	0
MAPRE1	0	0	2178400	0	4.59052e-07	1	0.5	FALSE	0	0	0	0	0	0	0	0	0	0
FAF2	0	0	0	2235500	1	4.47327e-07	0.5	FALSE	0	0	0	0	0	0	0	0	0	0
CDK12	0	0	0	2236400	1	4.47147e-07	0.5	FALSE	0	0	0	0	0	0	0	0	0	0
GPX4	0	0	2248300	0	4.4478e-07	1	0.5	FALSE	0	0	0	0	0	0	0	0	0	0
PSMF1	0	0	0	2275600	1	4.39444e-07	0.5	FALSE	0	0	0	0	0	0	0	0	0	0
NUP35	0	0	2322500	0	4.3057e-07	1	0.5	FALSE	0	0	0	0	0	0	0	0	0	0
PSMC5	0	0	2428200	0	4.11828e-07	1	0.5	FALSE	2060400	2759100	0	0	3129600	0	2387300	2464700	0	0
ZKSCAN1	0	0	0	2431800	1	4.11218e-07	0.5	FALSE	0	0	0	0	0	0	0	0	0	0
DUSP23	0	0	0	2445600	1	4.08897e-07	0.5	FALSE	0	0	0	0	0	0	0	0	0	0
MTPN	0	0	2531800	0	3.94976e-07	1	0.5	FALSE	0	0	0	0	0	0	0	0	0	0
RPS15	0	0	2552000	0	3.91849e-07	1	0.5	FALSE	2664900	0	2192200	0	7996500	0	2646400	0	2426600	0
HAT1	0	0	0	2563300	1	3.90122e-07	0.5	FALSE	0	0	0	0	0	0	0	0	0	0
DFFA	0	0	2574500	0	3.88425e-07	1	0.5	FALSE	3962100	0	0	0	0	0	0	0	0	0
PWP1	0	0	2617500	0	3.82044e-07	1	0.5	FALSE	0	0	0	0	0	0	0	0	0	0
ACTR1A	0	0	2639500	0	3.78859e-07	1	0.5	FALSE	2322400	2941700	4572200	2870600	3753100	2912300	3107800	4270600	2106700	0
LSM4	0	0	0	2671300	1	3.74349e-07	0.5	FALSE	0	0	0	0	0	0	0	0	0	0
CAB39L	0	0	0	2682400	1	3.728e-07	0.5	FALSE	0	0	0	0	0	0	0	0	0	0
WRNIP1	0	0	2700800	0	3.70261e-07	1	0.5	FALSE	3014600	0	3997100	0	0	0	2533500	0	0	0
DBN1	0	0	2719400	0	3.67728e-07	1	0.5	FALSE	0	0	0	0	0	0	0	0	0	0
RPRD1B	0	0	2755800	0	3.62871e-07	1	0.5	FALSE	1369900	0	2672600	0	0	0	0	0	0	0
WDHD1	0	0	2756200	0	3.62818e-07	1	0.5	FALSE	4198300	0	0	0	0	0	0	0	0	0
DEK	0	0	0	2809900	1	3.55884e-07	0.5	FALSE	0	0	0	0	0	0	0	0	0	0
EIF2A	0	0	2851300	0	3.50717e-07	1	0.5	FALSE	4258700	0	3794200	2833100	3047500	0	0	0	0	0
HSP90AB4P	0	0	0	2857000	1	3.50017e-07	0.5	FALSE	0	0	0	0	0	0	0	0	0	0
KIAA0368	0	0	2891400	0	3.45853e-07	1	0.5	FALSE	2697100	0	2333500	0	2763800	2375800	3285800	0	2829800	0
PSMB4	0	0	2948900	0	3.39109e-07	1	0.5	FALSE	0	0	0	0	0	0	0	0	0	0
BEND7	0	0	0	3001400	1	3.33178e-07	0.5	FALSE	0	0	0	0	0	0	0	0	0	0
GTF2F1	0	0	3101500	0	3.22425e-07	1	0.5	FALSE	3254700	0	0	0	3136100	0	0	0	0	0
MLH1	0	0	3116100	0	3.20914e-07	1	0.5	FALSE	4665800	0	3143600	0	3057600	0	3331300	3703600	0	0
HIRIP3	0	0	0	3269100	1	3.05894e-07	0.5	FALSE	0	0	0	0	0	0	0	0	0	0
PSMC2	0	0	0	3348000	1	2.98686e-07	0.5	FALSE	4365400	0	4683100	0	7731500	4324000	6710700	5250700	0	3875800
SRRM1	0	0	0	3440200	1	2.90681e-07	0.5	FALSE	0	0	0	0	0	0	0	0	0	0
HERC4	0	0	0	3671200	1	2.7239e-07	0.5	FALSE	0	0	0	0	0	0	0	0	0	0
PPL	0	0	0	3935700	1	2.54084e-07	0.5	FALSE	0	0	0	0	0	0	0	0	0	0
LANCL1	0	0	4183300	0	2.39046e-07	1	0.5	FALSE	0	0	0	0	0	0	0	0	0	0
MPRIP	0	0	0	4223200	1	2.36787e-07	0.5	FALSE	0	0	0	0	0	0	0	0	0	0
SNRNP40	0	0	4395900	0	2.27485e-07	1	0.5	FALSE	3865600	0	3930500	0	3760400	4683700	6425300	5735600	6000000	7734500
PPP1R13B	0	0	0	4467200	1	2.23854e-07	0.5	FALSE	0	4840400	0	0	0	0	0	0	0	6561300
FBRSL1	0	0	4770400	0	2.09626e-07	1	0.5	FALSE	2403000	0	0	3341100	0	0	0	3719800	0	0
SRSF5	0	0	0	4935600	1	2.0261e-07	0.5	FALSE	5060400	4701700	6053900	0	6099600	5368300	6449100	0	0	4432600
DNMT1	0	0	5001800	0	1.99928e-07	1	0.5	FALSE	0	0	0	3125600	5330200	0	0	0	0	0
CAPZB	0	0	0	5136200	1	1.94696e-07	0.5	FALSE	0	0	0	0	0	0	0	0	0	0
BOLA2	0	0	5395400	0	1.85343e-07	1	0.5	FALSE	0	0	0	0	0	0	0	0	0	0
DYNLL2	0	0	0	5731700	1	1.74468e-07	0.5	FALSE	0	0	0	0	0	0	0	0	0	0
RBM10	0	0	7634900	0	1.30977e-07	1	0.5	FALSE	0	0	8104500	0	0	7845700	8775300	0	0	0
XPNPEP1	0	0	0	8242100	1	1.21328e-07	0.5	FALSE	0	0	0	0	0	0	0	0	0	0
STRN	0	0	0	8313900	1	1.2028e-07	0.5	FALSE	0	0	0	0	0	0	0	0	0	0
COPZ1	0	0	0	9304000	1	1.07481e-07	0.5	FALSE	8022200	0	0	0	12542000	0	0	13167000	0	0
RGPD3	0	0	14989000	0	6.67156e-08	1	0.5	FALSE	0	0	0	0	0	0	0	0	0	0
RC3H1	0	0	0	28513000	1	3.50717e-08	0.5	FALSE	0	0	8458400	0	0	0	0	0	0	0
DKFZp586F0420	0	0	44308000	0	2.25693e-08	1	0.5	FALSE	0	0	0	0	0	0	0	0	0	0
TLN1	0	4470000	4939200	4561000	2.02462e-07	0.980048	0.490024	FALSE	5408500	0	6915300	0	7514900	0	5668500	5535300	6810800	0
PHPT1	3442300	0	3560700	4049000	0.966748	2.46975e-07	0.483374	FALSE	4371800	0	5551200	3815900	6929000	4584800	4798500	4687200	4364900	4033200
EIF3G	5478500	0	5785700	4646600	0.946904	2.15211e-07	0.473452	FALSE	4665100	0	4155400	3564700	4532100	4435600	5640600	6118600	0	0
YBX3	1489200	0	1644600	1383400	0.905509	7.22856e-07	0.452755	FALSE	1492100	1278100	1405700	0	1233500	1321600	1930500	1414200	0	0
LYPLAL1	0	6238000	6400100	6898500	1.56248e-07	0.904255	0.452127	FALSE	7806400	0	6969000	9256500	8336900	7428500	6483300	0	0	0
CPSF6	5450900	0	6042900	4160900	0.902034	2.40333e-07	0.451017	FALSE	4584500	0	4183900	4655900	3815700	5004800	5866100	3759800	5790400	0
TROVE2	0	3391600	4492600	3763700	2.22588e-07	0.901135	0.450567	FALSE	4882800	0	4050700	0	3406200	3217500	0	0	2385200	0
FKBP3	5330300	0	6163400	4383500	0.864831	2.28128e-07	0.432416	FALSE	8077600	6954900	6446900	6391200	6675900	6143300	8046700	10041000	0	8853000
G3BP2	0	3275600	3969900	3845000	2.51895e-07	0.851912	0.425956	FALSE	3228900	3337600	3035300	3260700	3972600	3375500	3381300	0	3688000	3774700
NAA10	1277500	0	1554700	1529800	0.821702	6.5368e-07	0.410851	FALSE	1852500	3039600	1492000	0	2140300	1822600	2045300	1259400	1945500	0
MRE11A	4225100	0	5153700	4716000	0.819819	2.12044e-07	0.40991	FALSE	6092500	0	5068400	0	6138400	5818500	0	4295700	4219900	0
MTA2	5890900	0	7309400	7698100	0.805935	1.29902e-07	0.402967	FALSE	7315800	5918200	7508900	0	5455700	7165600	7023800	5640900	5329500	0
NFRKB	7793200	11537000	21453000	30382000	0.363269	0.379731	0.3715	FALSE	9908300	22856000	7411100	11183000	3462800	11643000	13766000	9232400	12981000	28348000
ATXN2L	6815600	0	9444600	13094000	0.72164	7.63709e-08	0.36082	FALSE	5876600	8519400	6118900	5257200	5114200	6515000	6644100	5348700	6500400	7891400
SARS	5203800	0	7276700	5753600	0.715132	1.73804e-07	0.357566	FALSE	4754700	0	5499600	4801800	5510600	0	5618300	0	0	0
LIMA1	1974600	0	2848600	2254900	0.693183	4.43478e-07	0.346592	FALSE	1735400	0	0	2640400	2543700	1935800	2317400	2387100	2114700	4384300
KIF15	118690000	77171000	298720000	289390000	0.397329	0.266668	0.331998	FALSE	150030000	231550000	148050000	120650000	126610000	152030000	166960000	151020000	205040000	300150000
FKBP5	12932000	13784000	48125000	39182000	0.268717	0.351794	0.310256	FALSE	41020000	18200000	30139000	21172000	33535000	33795000	29331000	18901000	32557000	13229000
BCL9	13566000	11112000	51118000	33783000	0.265386	0.328923	0.297154	FALSE	15056000	26055000	10144000	33249000	12199000	20443000	14667000	14597000	37687000	29104000
TNPO1	3486900	0	6319600	4176400	0.55176	2.39441e-07	0.27588	FALSE	5780500	0	5889600	5068800	7685800	4355800	4240200	3606000	4449600	3664100
CDC37	2423600	0	4816900	2962500	0.503145	3.37553e-07	0.251573	FALSE	4718800	3357200	3752000	0	3950100	3173900	4374800	3283700	2924000	2098200
CEP170B	0	2154400	5564700	4359600	1.79704e-07	0.494174	0.247087	FALSE	2866600	3373200	2890400	3609800	2346900	3046300	2520800	0	2786600	2709700
MIA3	13935000	9768500	75803000	40012000	0.183832	0.244139	0.213986	FALSE	39060000	10699000	28356000	16161000	19192000	25681000	24357000	14189000	29200000	13166000
CUL1	2641600	0	6646700	3351100	0.39743	2.98409e-07	0.198715	FALSE	6101900	2891700	6459900	3282500	5924000	2934100	4719000	3442300	6121600	0
LSM14A	4728400	0	13779000	5824300	0.34316	1.71694e-07	0.17158	FALSE	3807800	4820800	0	3252400	6699600	0	7401400	4910300	6177800	0
CTAGE5	9806900	3306100	62940000	30670000	0.155813	0.107796	0.131805	FALSE	26750000	2447500	15487000	10920000	14150000	11764000	7766200	5829400	24937000	6841500
HRNR	0	0	625620	719730	1.59841e-06	1.38941e-06	1.49391e-06	FALSE	779260	0	559450	566440	452950	0	568950	0	0	716790
EIF1AX	0	0	844860	859660	1.18363e-06	1.16325e-06	1.17344e-06	FALSE	821510	0	880670	0	1132300	0	998100	788410	0	0
SLIRP	0	0	1304500	1230500	7.66577e-07	8.12677e-07	7.89627e-07	FALSE	2466000	0	2528800	0	0	1498600	1894100	1911500	0	0
PQBP1	0	0	3237200	3122800	3.08909e-07	3.20225e-07	3.14567e-07	FALSE	2858600	2908100	3542800	3015700	2741400	4106600	2962200	3105000	3511100	0
PSMB1	0	0	3921800	3047500	2.54985e-07	3.28138e-07	2.91561e-07	FALSE	0	3985600	3514300	3952600	3129700	3420800	0	4357300	4096800	0
LIMCH1	0	0	4791000	5188000	2.08725e-07	1.92752e-07	2.00739e-07	FALSE	4244800	4180300	4245400	4122200	5014600	4933800	4197300	3881600	4554800	0
PFDN4	0	0	5047700	5306400	1.9811e-07	1.88452e-07	1.93281e-07	FALSE	4822200	0	4949700	0	5398800	4129500	6801600	4244900	3946100	0
BCL9L	0	0	14475000	17566000	6.90846e-08	5.69282e-08	6.30064e-08	FALSE	10861000	0	7300500	12183000	8309100	12501000	0	0	0	0

## Sheet: LFQ_enza
Gene	DHT_2	DHT_3	enza_2	enza_3	FC_2	FC_3	AVG(FC)	BothAbv1?	13789_2	13789_3	14449_2	14449_3	17005_2	17005_3	220010_2	220010_3	EtOH_2	EtOH_3
SUMO2	37562000	22535000	9340000	0	4.02163	22535001	1.12675e+07	TRUE	11835000	17952000	12439000	0	0	0	15569000	0	0	0
HINT1	18614000	14021000	18155000	0	1.02528	14021001	7.0105e+06	TRUE	28924000	11640000	23646000	31622000	24476000	21393000	13389000	8500200	14946000	13724000
TRIM33	10380000	12340000	8435900	0	1.23046	12340001	6.17e+06	TRUE	12255000	15260000	9510800	19056000	8233000	8878000	12929000	9677200	5583600	6116700
HN1L	3242300	3442100	0	0	3242301	3442101	3342201	TRUE	0	0	0	2409700	5001900	0	3307000	0	0	0
NUP133	6186300	5956700	5245700	0	1.17931	5956701	2.97835e+06	TRUE	7380300	0	7942000	8977400	6452100	0	4566000	0	0	5527400
EHF	5983500	5729100	5094000	0	1.17462	5729101	2.86455e+06	TRUE	8301300	6073800	3877200	5880800	4797500	4994900	3581700	0	0	0
DSTN	5720500	5600200	5037200	0	1.13565	5600201	2.8001e+06	TRUE	4529000	4954300	4621500	4720900	4802300	8602400	4516900	4064500	4338700	4851300
OTUB1	6055300	5569000	5497600	0	1.10144	5569001	2.7845e+06	TRUE	4473500	0	5276700	4746300	5729800	0	6054500	0	5756200	0
SELENBP1	7908400	4977300	6656600	0	1.18805	4977301	2.48865e+06	TRUE	5576700	4136500	5563500	5159000	7715200	6083500	6301900	4831400	0	4107200
SEC23IP	5231900	4807200	4419700	0	1.18377	4807201	2.4036e+06	TRUE	5707800	0	6463800	4218900	4541600	4142700	4106700	0	4115000	4782100
RNPS1	7265400	4680200	5128600	0	1.41664	4680201	2.3401e+06	TRUE	4270000	0	6305300	4547300	4100100	4085900	5993900	0	7042900	0
U2SURP	7062900	4255100	5264900	0	1.34151	4255101	2.12755e+06	TRUE	6034500	0	5909200	5499300	0	0	6412100	0	5964400	0
NCOA5	5997300	4244500	4411800	0	1.35938	4244501	2.12225e+06	TRUE	5026600	0	3422100	0	4741000	4525800	4493200	0	3965300	0
SF3A1	5546500	3901000	5379500	0	1.03104	3901001	1.9505e+06	TRUE	6066200	0	6556300	5784400	4847100	6109900	0	0	5453600	0
NFIC	4957300	3643100	3936400	0	1.25935	3643101	1.82155e+06	TRUE	4925200	5024400	3548400	0	4300500	4002700	4594000	0	3824800	3258900
PIAS2	3561700	4935300	0	2202200	3561701	2.24108	1.78085e+06	TRUE	4989000	2949100	2173700	3193000	0	2612200	2689800	0	1611600	0
G3BP1	3257100	3445500	3249800	0	1.00225	3445501	1.72275e+06	TRUE	2112200	0	2202000	3122100	0	3576200	2860100	0	0	0
CDK4	2658200	3156200	2523300	0	1.05346	3156201	1.5781e+06	TRUE	2877100	3687700	2564000	2668000	2692300	2707900	3415700	0	0	2401500
TBL3	3744500	2866900	3150100	0	1.18869	2866901	1.43345e+06	TRUE	2777500	0	3209200	3556400	0	3256000	3069500	0	2895100	0
PRPF31	3408400	2823200	3402900	0	1.00162	2823201	1.4116e+06	TRUE	3108800	2731000	3838000	4241700	2045300	0	2457300	0	2916300	0
LUC7L3	5878900	2803400	3181600	0	1.84778	2803401	1.4017e+06	TRUE	4105500	0	0	3485400	5463900	2856400	2762500	0	0	0
RXRB	3611000	2770400	3113400	0	1.15983	2770401	1.3852e+06	TRUE	4009700	0	2957100	4749300	3469500	0	0	0	2937200	0
OSTF1	4875500	2673300	3940800	0	1.23719	2673301	1.33665e+06	TRUE	3733500	0	0	3985100	0	0	0	0	0	0
NPLOC4	2581400	2197200	2009900	0	1.28434	2197201	1.0986e+06	TRUE	2316600	0	0	0	2348300	0	1957000	0	0	0
RPP30	2936200	2132300	2296400	0	1.27861	2132301	1.06615e+06	TRUE	0	3196100	1843100	2025500	2335200	0	2191900	0	2418700	0
RAI1	1442700	1382400	1038200	0	1.38962	1382401	691201	TRUE	1466700	1654500	0	0	0	0	0	0	1352200	0
NKX3-1	20347000	24852000	7290200	7997900	2.79101	3.10732	2.94916	TRUE	15546000	17359000	4646200	10909000	9353700	11218000	10147000	8259000	2366300	0
PDHB	19935000	21751000	10940000	6809000	1.82221	3.19445	2.50833	TRUE	19113000	6319700	17258000	9289200	8964000	12653000	10087000	9063700	17397000	11985000
ZMYM4	37900000	32900000	13598000	29500000	2.78717	1.11525	1.95121	TRUE	16904000	25258000	12851000	23208000	15965000	23891000	21659000	26915000	20217000	21851000
ZMIZ1	3580700	4078500	2156900	1901300	1.66011	2.14511	1.90261	TRUE	3512100	2611100	3048900	3292900	2252500	2083400	2906800	2315300	2048700	1885400
MBNL1	4376300	7839700	3121600	3371800	1.40194	2.32508	1.86351	TRUE	2720300	5405800	0	3513500	3697200	0	3784800	0	3108400	2932700
AES	10169000	6745100	6241400	3755100	1.62928	1.79625	1.71277	TRUE	9246100	10036000	4801400	8226500	6501000	5842100	6863700	4608500	4153900	2598400
TLE3	119810000	90546000	73929000	53599000	1.62061	1.68932	1.65497	TRUE	119180000	102250000	67563000	98581000	89282000	81336000	83567000	38468000	53687000	28371000
AR	1172500000	1183500000	615310000	957190000	1.90554	1.23643	1.57099	TRUE	709260000	1115600000	622960000	1015600000	811680000	800450000	1064500000	754520000	582220000	488740000
SMARCD1	28148000	31342000	18888000	19224000	1.49026	1.63036	1.56031	TRUE	24196000	22533000	19064000	24978000	21349000	22501000	26201000	13681000	6780400	9243900
NCOR2	14179000	11443000	12341000	5923500	1.14893	1.9318	1.54037	TRUE	16922000	12435000	10299000	16003000	9709200	7340500	14216000	5954500	10210000	4953100
ARPC4-TTLL3	7453000	6498000	3680800	6432000	2.02483	1.01026	1.51755	TRUE	4281400	0	4152800	3782400	5848600	4799400	5359500	0	0	0
DDX41	4809300	3951800	3729400	2436000	1.28956	1.62225	1.45591	TRUE	3305900	0	4183700	3803500	4859600	5682500	3293900	0	4245400	0
DPF2	90686000	61681000	81347000	34765000	1.1148	1.77423	1.44452	TRUE	111230000	72483000	76537000	92938000	50711000	72238000	72231000	28839000	43794000	36375000
FOXA1	100290000	99082000	64373000	79007000	1.55795	1.25409	1.40602	TRUE	117620000	103250000	68501000	92628000	42049000	60547000	88195000	35305000	42975000	18665000
GRHL2	4790000	5763100	3752700	3756400	1.27641	1.53421	1.40531	TRUE	12472000	0	6058400	6079600	6614900	3735200	5985200	0	0	0
ADNP	17338000	16408000	10858000	13919000	1.59679	1.17882	1.38781	TRUE	15091000	17214000	11257000	18608000	12542000	11681000	14156000	13026000	9597100	10395000
SMARCD2	266260000	222010000	194700000	169180000	1.36754	1.31227	1.33991	TRUE	262100000	255280000	215950000	299750000	201050000	210190000	244410000	147140000	117180000	106530000
TCF20	5166500	6050000	4915800	3913200	1.051	1.54605	1.29852	TRUE	7318000	5646000	5114900	8169200	5739600	3750900	6717100	3154200	3118900	2086300
KARS	5569400	6030700	4233600	4758000	1.31552	1.26749	1.2915	TRUE	3974700	0	4686100	4521600	5140400	6214800	3737900	0	4780800	5285400
ZFR	7494400	5806800	5526800	5047300	1.35601	1.15048	1.25324	TRUE	7725500	7362000	6560500	6342800	7456200	5229900	7329500	0	5802700	4821400
NOSIP	12039000	9826700	9117900	8990500	1.32037	1.09301	1.20669	TRUE	10093000	7016900	8141900	11007000	7517200	8525700	7881300	5598000	6820100	6532700
PDS5B	5085300	5218600	4807200	4082600	1.05785	1.27825	1.16805	TRUE	5361500	0	3631900	5016100	1076300	3865400	3970900	4494400	4928000	4306000
SERBP1	3325600	3338600	2742000	3011000	1.21284	1.1088	1.16082	TRUE	2795600	2535800	4447600	3293800	2571700	2036800	3350600	0	3244000	2022100
MTAP	4181400	2429200	3578300	2131100	1.16854	1.13988	1.15421	TRUE	3449900	2863000	4071100	3379100	2834400	0	3586700	0	3531400	0
RBM4	19728000	15625000	17878000	13282000	1.10348	1.1764	1.13994	TRUE	21480000	21784000	16071000	17697000	18694000	19326000	22275000	10928000	18448000	12584000
WDR3	2584800	2589500	2226200	2323700	1.16108	1.11439	1.13773	TRUE	2056300	1641500	2158700	2254500	0	2689100	2418000	0	0	0
MRTO4	1942900	1856600	1699600	1774600	1.14315	1.04621	1.09468	TRUE	1808900	0	2246000	1609800	1916900	1750900	1793400	1910500	1849000	0
SMARCB1	19362000	12878000	30867000	0	0.627272	12878001	6.439e+06	FALSE	38080000	16346000	24441000	27332000	14752000	10972000	17615000	12471000	14109000	0
OGT	8670800	9313900	13879000	0	0.624742	9313901	4.65695e+06	FALSE	14408000	0	13280000	13159000	11776000	7772700	14258000	0	7471600	0
SET	10035000	6560500	14338000	0	0.699888	6560501	3.28025e+06	FALSE	11248000	6484900	8256000	9126000	9505000	9276200	7967200	6234000	9281000	0
PPIL4	5754600	5753200	6435000	0	0.894266	5753201	2.8766e+06	FALSE	5953300	0	5415600	6251200	6217600	4475800	6328000	4998100	4780700	0
CHAMP1	7669900	5591700	7829100	0	0.979666	5591701	2.79585e+06	FALSE	10862000	7674800	5791700	8034700	6874900	6009300	6491200	4690500	6290900	0
DPF1	3603100	4151300	3766900	0	0.956516	4151301	2.07565e+06	FALSE	6707400	4673100	3627100	7133100	3547800	3704200	4548300	0	2884200	2622100
ANP32E	6198200	3780200	10731000	0	0.577598	3780201	1.8901e+06	FALSE	11297000	5650600	6320100	5397500	5985100	5356700	0	0	4217500	0
AIP	3609700	3277600	4465500	0	0.808353	3277601	1.6388e+06	FALSE	5577700	3766900	5329500	0	3863100	3615200	0	2680200	3567000	2911700
PDS5A	3793300	2797000	4658200	0	0.814327	2797001	1.3985e+06	FALSE	4388500	2600700	3226100	4614100	3535900	4044600	5339000	0	0	0
RNPEP	2152300	2460200	3540700	0	0.607874	2460201	1.2301e+06	FALSE	2540900	0	2426100	2099400	3843700	2011500	2582100	2675900	0	0
FAM50A	8956100	6560400	9273000	2461900	0.965826	2.66477	1.8153	FALSE	10337000	0	8298600	9807400	7072100	0	8520100	0	7657200	5416400
ARID1A	77722000	73699000	85800000	41995000	0.905851	1.75495	1.3304	FALSE	90296000	68653000	69543000	84207000	70761000	51239000	88549000	41407000	45666000	24494000
CTBP2	13587000	15152000	13780000	9065100	0.985994	1.67147	1.32873	FALSE	13232000	18281000	12941000	15128000	13366000	17195000	11787000	0	8317400	0
CHD4	11741000	4017000	7453600	4220300	1.57521	0.951828	1.26352	FALSE	8700200	4893700	8539000	6305700	5010600	4584500	6842600	0	5393400	3819300
U2AF1	2884300	2023900	2011000	2104900	1.43426	0.961518	1.19789	FALSE	2000900	1785400	1751000	1875700	2186900	0	0	0	2537900	0
WDR5	5772300	3990000	4069700	4167100	1.41836	0.9575	1.18793	FALSE	5844400	0	4152000	4509500	6102500	5105000	4807300	3502300	2395100	3191600
GSE1	5898900	4467000	7021900	3176200	0.840072	1.4064	1.12323	FALSE	10190000	3608400	7505300	7789500	6522400	4361100	7023900	2861700	3684400	3527300
RPS26	9323000	5776900	6570600	7158900	1.4189	0.806954	1.11292	FALSE	0	7009700	10928000	5976400	0	8214000	7152400	5208100	0	0
DCAF7	11167000	9662400	11693000	7806200	0.955016	1.23779	1.0964	FALSE	16646000	13277000	12054000	16682000	16204000	7199200	20181000	9564400	9123700	6240200
ARID1B	16336000	12299000	23563000	8276400	0.69329	1.48603	1.08966	FALSE	28462000	24552000	16630000	17703000	17868000	13503000	20935000	4091600	12291000	5486000
ACTL6A	40369000	29019000	46510000	22387000	0.867964	1.29624	1.0821	FALSE	61241000	28397000	43624000	51301000	42496000	36204000	39593000	19759000	34479000	15795000
SMARCE1	100870000	86649000	106590000	72135000	0.946336	1.20121	1.07377	FALSE	149240000	74413000	89235000	117950000	95128000	88934000	115290000	65884000	56068000	32231000
NOL6	1773800	1953500	1472600	2131000	1.20454	0.916706	1.06062	FALSE	0	0	1944600	2063000	0	0	0	0	0	1852600
PDCD5	4687100	4151900	4047700	4323700	1.15797	0.960266	1.05912	FALSE	4560000	0	4220100	4359200	4259300	0	4552200	3758400	3097200	3271700
TBX3	1913400	1808600	2053800	1549000	0.931639	1.16759	1.04962	FALSE	2273000	1911200	2155200	2362200	2048700	0	2340900	0	0	0
RBM8A	9000300	9072900	7348600	10477000	1.22476	0.865983	1.04537	FALSE	6378000	4703400	4748000	6377800	15504000	4136900	10556000	7006000	6729300	4595600
SEC22B	1615700	1895400	1678400	1684500	0.962643	1.1252	1.04392	FALSE	1617400	1683200	2281700	0	1479400	2301200	1680300	1581100	0	0
HDAC2	6238900	5438900	6323000	5011600	0.986699	1.08526	1.03598	FALSE	8021800	0	5936600	5924700	5417900	5356200	5107900	0	5401900	0
NAPA	8770700	4624200	8972300	4235200	0.977531	1.09185	1.03469	FALSE	7570300	7700200	6808000	6934700	5583600	5854000	4484000	0	4642000	0
SMARCC1	47719000	24654000	72593000	17965000	0.65735	1.37234	1.01484	FALSE	77583000	29087000	51644000	51756000	35813000	34717000	41570000	18391000	28993000	9975400
SF3A3	5577000	3797200	6679700	3209800	0.834918	1.183	1.00896	FALSE	8063200	3378600	5793600	6005300	4608500	5703500	4213100	0	5198200	0
GLRX3	6597900	4382800	6931800	4137400	0.951831	1.05931	1.00557	FALSE	7447000	6351000	6950900	6544500	6595400	7104100	6575200	3148700	5621100	3259300
SMARCC2	113870000	61310000	132740000	53478000	0.857842	1.14645	1.00215	FALSE	165760000	105450000	119370000	119980000	108870000	92531000	103100000	46222000	72396000	36937000
TSEN34	4266600	3059800	5283600	2624700	0.807518	1.16577	0.986644	FALSE	6599400	3578200	5542100	5314500	3697500	3528300	4530400	0	3063900	2792200
SNW1	9846800	4127800	7791800	5893500	1.26374	0.700399	0.982069	FALSE	7750700	4291100	7199200	7448200	5916900	5625200	8814000	4356600	5577600	0
HMG20B	3407300	3063100	5859000	2227700	0.58155	1.37501	0.978278	FALSE	6458200	3266000	5065800	3591200	2222400	2202700	5497100	2057500	3109400	0
TRIM24	7919400	6604800	9201200	6036200	0.860692	1.0942	0.977445	FALSE	8350000	9145600	6369000	11877000	6898200	8483300	8180900	4940300	6974600	5838800
SMARCA2	7358400	6864000	9824800	5764000	0.748962	1.19084	0.969901	FALSE	10360000	7603600	6609300	6708000	6822800	7195700	7115400	0	0	0
CTBP1	16047000	13347000	20060000	12036000	0.79995	1.10892	0.954437	FALSE	19595000	9773800	15156000	15928000	18088000	15231000	17013000	11578000	13913000	12138000
YWHAZ	12923000	7733100	10943000	11384000	1.18094	0.679296	0.930117	FALSE	7967400	0	7609200	11151000	11075000	12730000	10380000	7988900	10533000	0
U2AF2	9032500	6518300	8611400	8312400	1.0489	0.784166	0.916533	FALSE	8158300	30879000	5265500	8965100	5529400	5903200	9827500	3565100	8493500	5858300
HMGB2	21359000	18903000	28477000	17707000	0.750044	1.06754	0.908794	FALSE	18122000	21833000	23871000	20600000	0	18490000	26715000	21489000	0	0
SMARCA4	56576000	52840000	97457000	43717000	0.580523	1.20868	0.894603	FALSE	97112000	80609000	60887000	76917000	63801000	46009000	82292000	39930000	49830000	24199000
MARS	11953000	8045100	11799000	10918000	1.01305	0.736866	0.874959	FALSE	10483000	0	12642000	9452800	8765200	7990000	9810500	11890000	10174000	0
STT3A	3114900	3511000	2871600	5310800	1.08473	0.661106	0.872916	FALSE	3164500	1707900	3293100	2774500	2394700	4167800	2405900	0	2499900	3423500
ATP2A2	7132200	5970700	7449000	7627600	0.957471	0.782776	0.870123	FALSE	7611500	6487600	9434800	9461800	4938300	8276200	5531700	0	0	0
PDCD4	4136500	3053800	5366000	3202900	0.770872	0.953448	0.86216	FALSE	5515000	2987300	4106700	3282400	3452200	4638800	4468400	2652200	3503100	2175500
NAMPT	11172000	6376600	14338000	6939400	0.779188	0.918898	0.849043	FALSE	13342000	8192500	10861000	10563000	10386000	9302100	11235000	7027500	10350000	6013600
PSMA3	763370	705470	955860	799480	0.798621	0.882411	0.840516	FALSE	712010	868730	718420	727950	834050	0	833890	690120	0	0
MCM4	5527000	4823900	6639900	5816100	0.832392	0.829405	0.830898	FALSE	9892600	5595000	12953000	6869100	5761400	5287000	6218900	5236100	0	0
PBRM1	2888000	2623200	3880600	2913600	0.744215	0.90033	0.822272	FALSE	4053100	2544500	4035200	3774200	3603500	3468200	3298600	0	2525000	1864500
CPNE1	4138800	4403200	4809100	5672100	0.860618	0.776291	0.818455	FALSE	5229000	4737500	5254900	5622300	5542400	5687500	3902800	3377800	3942700	0
PSMA1	3801000	4062800	5923000	4094600	0.641736	0.992234	0.816985	FALSE	6048700	0	4656400	4411100	4882900	5090600	5808500	0	0	0
BROX	4567500	3402800	6063800	3947000	0.753241	0.862123	0.807682	FALSE	5033800	3682700	5461300	3647900	5088300	5255100	4818500	0	4233200	0
LRPPRC	4015000	5206200	7896000	4848200	0.508485	1.07384	0.791164	FALSE	8926400	4622300	8668500	4495200	5837500	6785000	4747200	4869400	3431700	0
RPLP2	11636000	8006200	15363000	10148000	0.757404	0.788944	0.773174	FALSE	17502000	6645800	19014000	11614000	14851000	19760000	13389000	0	11208000	6586800
KDM6A	4420600	3854200	5514800	5340100	0.801588	0.721747	0.761668	FALSE	4715200	3605900	4622400	5659100	5342700	4369400	4496300	0	3862200	3713100
RECQL	5328300	5745300	12783000	5198000	0.416827	1.10529	0.761059	FALSE	7504000	5710100	5673400	7312700	6651300	4949500	8006200	4711900	4822500	3075500
SHMT2	4167700	4641700	10751000	4118800	0.387657	1.12695	0.757306	FALSE	10170000	0	7609900	4888800	9969900	11785000	6266700	4990300	2879700	3805200

## Sheet: LFQ_220010
Gene	DHT_2	DHT_3	220010_2	220010_3	FC_2	FC_3	AVG(FC)	BothAbv1?	enza_2	enza_3	13789_2	13789_3	14449_2	14449_3	17005_2	17005_3	EtOH_2	EtOH_3
SUMO2	37562000	22535000	15569000	0	2.41261	22535001	1.12675e+07	TRUE	9340000	0	11835000	17952000	12439000	0	0	0	0	0
CTBP2	13587000	15152000	11787000	0	1.15271	15152001	7.576e+06	TRUE	13780000	9065100	13232000	18281000	12941000	15128000	13366000	17195000	8317400	0
ANP32E	6198200	3780200	0	0	6198201	3780201	4989201	TRUE	10731000	0	11297000	5650600	6320100	5397500	5985100	5356700	4217500	0
SF3A1	5546500	3901000	0	0	5546501	3901001	4723751	TRUE	5379500	0	6066200	0	6556300	5784400	4847100	6109900	5453600	0
MBNL1	4376300	7839700	3784800	0	1.15628	7839701	3.91985e+06	TRUE	3121600	3371800	2720300	5405800	0	3513500	3697200	0	3108400	2932700
OSTF1	4875500	2673300	0	0	4875501	2673301	3774401	TRUE	3940800	0	3733500	0	0	3985100	0	0	0	0
SMARCA2	7358400	6864000	7115400	0	1.03415	6864001	3.432e+06	TRUE	9824800	5764000	10360000	7603600	6609300	6708000	6822800	7195700	0	0
FAM50A	8956100	6560400	8520100	0	1.05117	6560401	3.2802e+06	TRUE	9273000	2461900	10337000	0	8298600	9807400	7072100	0	7657200	5416400
ARPC4-TTLL3	7453000	6498000	5359500	0	1.39061	6498001	3.249e+06	TRUE	3680800	6432000	4281400	0	4152800	3782400	5848600	4799400	0	0
RXRB	3611000	2770400	0	0	3611001	2770401	3190701	TRUE	3113400	0	4009700	0	2957100	4749300	3469500	0	2937200	0
KARS	5569400	6030700	3737900	0	1.48998	6030701	3.01535e+06	TRUE	4233600	4758000	3974700	0	4686100	4521600	5140400	6214800	4780800	5285400
ATP2A2	7132200	5970700	5531700	0	1.28933	5970701	2.98535e+06	TRUE	7449000	7627600	7611500	6487600	9434800	9461800	4938300	8276200	0	0
NUP133	6186300	5956700	4566000	0	1.35486	5956701	2.97835e+06	TRUE	5245700	0	7380300	0	7942000	8977400	6452100	0	0	5527400
ZFR	7494400	5806800	7329500	0	1.0225	5806801	2.9034e+06	TRUE	5526800	5047300	7725500	7362000	6560500	6342800	7456200	5229900	5802700	4821400
EHF	5983500	5729100	3581700	0	1.67058	5729101	2.86455e+06	TRUE	5094000	0	8301300	6073800	3877200	5880800	4797500	4994900	0	0
OTUB1	6055300	5569000	6054500	0	1.00013	5569001	2.7845e+06	TRUE	5497600	0	4473500	0	5276700	4746300	5729800	0	5756200	0
HDAC2	6238900	5438900	5107900	0	1.22142	5438901	2.71945e+06	TRUE	6323000	5011600	8021800	0	5936600	5924700	5417900	5356200	5401900	0
PIAS2	3561700	4935300	2689800	0	1.32415	4935301	2.46765e+06	TRUE	0	2202200	4989000	2949100	2173700	3193000	0	2612200	1611600	0
U2AF1	2884300	2023900	0	0	2884301	2023901	2454101	TRUE	2011000	2104900	2000900	1785400	1751000	1875700	2186900	0	2537900	0
SEC23IP	5231900	4807200	4106700	0	1.27399	4807201	2.4036e+06	TRUE	4419700	0	5707800	0	6463800	4218900	4541600	4142700	4115000	4782100
RNPS1	7265400	4680200	5993900	0	1.21213	4680201	2.3401e+06	TRUE	5128600	0	4270000	0	6305300	4547300	4100100	4085900	7042900	0
NAPA	8770700	4624200	4484000	0	1.956	4624201	2.3121e+06	TRUE	8972300	4235200	7570300	7700200	6808000	6934700	5583600	5854000	4642000	0
U2SURP	7062900	4255100	6412100	0	1.1015	4255101	2.12755e+06	TRUE	5264900	0	6034500	0	5909200	5499300	0	0	5964400	0
NCOA5	5997300	4244500	4493200	0	1.33475	4244501	2.12225e+06	TRUE	4411800	0	5026600	0	3422100	0	4741000	4525800	3965300	0
CHD4	11741000	4017000	6842600	0	1.71587	4017001	2.0085e+06	TRUE	7453600	4220300	8700200	4893700	8539000	6305700	5010600	4584500	5393400	3819300
DDX41	4809300	3951800	3293900	0	1.46006	3951801	1.9759e+06	TRUE	3729400	2436000	3305900	0	4183700	3803500	4859600	5682500	4245400	0
SF3A3	5577000	3797200	4213100	0	1.32373	3797201	1.8986e+06	TRUE	6679700	3209800	8063200	3378600	5793600	6005300	4608500	5703500	5198200	0
NOL6	1773800	1953500	0	0	1773801	1953501	1863651	TRUE	1472600	2131000	0	0	1944600	2063000	0	0	0	1852600
NFIC	4957300	3643100	4594000	0	1.07908	3643101	1.82155e+06	TRUE	3936400	0	4925200	5024400	3548400	0	4300500	4002700	3824800	3258900
AIP	3609700	3277600	0	2680200	3609701	1.22289	1.80485e+06	TRUE	4465500	0	5577700	3766900	5329500	0	3863100	3615200	3567000	2911700
STT3A	3114900	3511000	2405900	0	1.29469	3511001	1.7555e+06	TRUE	2871600	5310800	3164500	1707900	3293100	2774500	2394700	4167800	2499900	3423500
G3BP1	3257100	3445500	2860100	0	1.13881	3445501	1.72275e+06	TRUE	3249800	0	2112200	0	2202000	3122100	0	3576200	0	0
TBL3	3744500	2866900	3069500	0	1.21991	2866901	1.43345e+06	TRUE	3150100	0	2777500	0	3209200	3556400	0	3256000	2895100	0
RAI1	1442700	1382400	0	0	1442701	1382401	1412551	TRUE	1038200	0	1466700	1654500	0	0	0	0	1352200	0
PRPF31	3408400	2823200	2457300	0	1.38705	2823201	1.4116e+06	TRUE	3402900	0	3108800	2731000	3838000	4241700	2045300	0	2916300	0
LUC7L3	5878900	2803400	2762500	0	2.12811	2803401	1.4017e+06	TRUE	3181600	0	4105500	0	0	3485400	5463900	2856400	0	0
WDR3	2584800	2589500	2418000	0	1.06898	2589501	1.29475e+06	TRUE	2226200	2323700	2056300	1641500	2158700	2254500	0	2689100	0	0
MTAP	4181400	2429200	3586700	0	1.16581	2429201	1.2146e+06	TRUE	3578300	2131100	3449900	2863000	4071100	3379100	2834400	0	3531400	0
NPLOC4	2581400	2197200	1957000	0	1.31906	2197201	1.0986e+06	TRUE	2009900	0	2316600	0	0	0	2348300	0	0	0
RPP30	2936200	2132300	2191900	0	1.33957	2132301	1.06615e+06	TRUE	2296400	0	0	3196100	1843100	2025500	2335200	0	2418700	0
NKX3-1	20347000	24852000	10147000	8259000	2.00522	3.00908	2.50715	TRUE	7290200	7997900	15546000	17359000	4646200	10909000	9353700	11218000	2366300	0
PDHB	19935000	21751000	10087000	9063700	1.97631	2.39979	2.18805	TRUE	10940000	6809000	19113000	6319700	17258000	9289200	8964000	12653000	17397000	11985000
FOXA1	100290000	99082000	88195000	35305000	1.13714	2.80646	1.9718	TRUE	64373000	79007000	117620000	103250000	68501000	92628000	42049000	60547000	42975000	18665000
TLE3	119810000	90546000	83567000	38468000	1.4337	2.3538	1.89375	TRUE	73929000	53599000	119180000	102250000	67563000	98581000	89282000	81336000	53687000	28371000
DPF2	90686000	61681000	72231000	28839000	1.2555	2.13881	1.69715	TRUE	81347000	34765000	111230000	72483000	76537000	92938000	50711000	72238000	43794000	36375000
SMARCD1	28148000	31342000	26201000	13681000	1.07431	2.29091	1.68261	TRUE	18888000	19224000	24196000	22533000	19064000	24978000	21349000	22501000	6780400	9243900
NOSIP	12039000	9826700	7881300	5598000	1.52754	1.75539	1.64147	TRUE	9117900	8990500	10093000	7016900	8141900	11007000	7517200	8525700	6820100	6532700
HINT1	18614000	14021000	13389000	8500200	1.39025	1.64949	1.51987	TRUE	18155000	0	28924000	11640000	23646000	31622000	24476000	21393000	14946000	13724000
ZMIZ1	3580700	4078500	2906800	2315300	1.23184	1.76154	1.49669	TRUE	2156900	1901300	3512100	2611100	3048900	3292900	2252500	2083400	2048700	1885400
ZMYM4	37900000	32900000	21659000	26915000	1.74985	1.22237	1.48611	TRUE	13598000	29500000	16904000	25258000	12851000	23208000	15965000	23891000	20217000	21851000
AES	10169000	6745100	6863700	4608500	1.48156	1.46362	1.47259	TRUE	6241400	3755100	9246100	10036000	4801400	8226500	6501000	5842100	4153900	2598400
AR	1172500000	1183500000	1064500000	754520000	1.10146	1.56855	1.335	TRUE	615310000	957190000	709260000	1115600000	622960000	1015600000	811680000	800450000	582220000	488740000
DSTN	5720500	5600200	4516900	4064500	1.26647	1.37783	1.32215	TRUE	5037200	0	4529000	4954300	4621500	4720900	4802300	8602400	4338700	4851300
SMARCD2	266260000	222010000	244410000	147140000	1.0894	1.50884	1.29912	TRUE	194700000	169180000	262100000	255280000	215950000	299750000	201050000	210190000	117180000	106530000
SMARCC1	47719000	24654000	41570000	18391000	1.14792	1.34055	1.24423	TRUE	72593000	17965000	77583000	29087000	51644000	51756000	35813000	34717000	28993000	9975400
ACTL6A	40369000	29019000	39593000	19759000	1.0196	1.46865	1.24412	TRUE	46510000	22387000	61241000	28397000	43624000	51301000	42496000	36204000	34479000	15795000
ADNP	17338000	16408000	14156000	13026000	1.22478	1.25963	1.24221	TRUE	10858000	13919000	15091000	17214000	11257000	18608000	12542000	11681000	9597100	10395000
PDS5B	5085300	5218600	3970900	4494400	1.28064	1.16113	1.22089	TRUE	4807200	4082600	5361500	0	3631900	5016100	1076300	3865400	4928000	4306000
SMARCC2	113870000	61310000	103100000	46222000	1.10446	1.32642	1.21544	TRUE	132740000	53478000	165760000	105450000	119370000	119980000	108870000	92531000	72396000	36937000
RPS26	9323000	5776900	7152400	5208100	1.30348	1.10921	1.20635	TRUE	6570600	7158900	0	7009700	10928000	5976400	0	8214000	0	0
GLRX3	6597900	4382800	6575200	3148700	1.00345	1.39194	1.1977	TRUE	6931800	4137400	7447000	6351000	6950900	6544500	6595400	7104100	5621100	3259300
CHAMP1	7669900	5591700	6491200	4690500	1.18158	1.19213	1.18686	TRUE	7829100	0	10862000	7674800	5791700	8034700	6874900	6009300	6290900	0
CPNE1	4138800	4403200	3902800	3377800	1.06047	1.30357	1.18202	TRUE	4809100	5672100	5229000	4737500	5254900	5622300	5542400	5687500	3942700	0
WDR5	5772300	3990000	4807300	3502300	1.20074	1.13925	1.16999	TRUE	4069700	4167100	5844400	0	4152000	4509500	6102500	5105000	2395100	3191600
SET	10035000	6560500	7967200	6234000	1.25954	1.05237	1.15596	TRUE	14338000	0	11248000	6484900	8256000	9126000	9505000	9276200	9281000	0
SELENBP1	7908400	4977300	6301900	4831400	1.25492	1.0302	1.14256	TRUE	6656600	0	5576700	4136500	5563500	5159000	7715200	6083500	0	4107200
PDCD5	4687100	4151900	4552200	3758400	1.02963	1.1047	1.06717	TRUE	4047700	4323700	4560000	0	4220100	4359200	4259300	0	3097200	3271700
SMARCB1	19362000	12878000	17615000	12471000	1.09918	1.03264	1.06591	TRUE	30867000	0	38080000	16346000	24441000	27332000	14752000	10972000	14109000	0
OGT	8670800	9313900	14258000	0	0.608136	9313901	4.65695e+06	FALSE	13879000	0	14408000	0	13280000	13159000	11776000	7772700	7471600	0
RPLP2	11636000	8006200	13389000	0	0.869072	8006201	4.0031e+06	FALSE	15363000	10148000	17502000	6645800	19014000	11614000	14851000	19760000	11208000	6586800
GRHL2	4790000	5763100	5985200	0	0.800307	5763101	2.88155e+06	FALSE	3752700	3756400	12472000	0	6058400	6079600	6614900	3735200	0	0
DPF1	3603100	4151300	4548300	0	0.792186	4151301	2.07565e+06	FALSE	3766900	0	6707400	4673100	3627100	7133100	3547800	3704200	2884200	2622100
PSMA1	3801000	4062800	5808500	0	0.654386	4062801	2.0314e+06	FALSE	5923000	4094600	6048700	0	4656400	4411100	4882900	5090600	0	0
KDM6A	4420600	3854200	4496300	0	0.983164	3854201	1.9271e+06	FALSE	5514800	5340100	4715200	3605900	4622400	5659100	5342700	4369400	3862200	3713100
HN1L	3242300	3442100	3307000	0	0.980435	3442101	1.72105e+06	FALSE	0	0	0	0	0	2409700	5001900	0	0	0
BROX	4567500	3402800	4818500	0	0.947909	3402801	1.7014e+06	FALSE	6063800	3947000	5033800	3682700	5461300	3647900	5088300	5255100	4233200	0
SERBP1	3325600	3338600	3350600	0	0.992539	3338601	1.6693e+06	FALSE	2742000	3011000	2795600	2535800	4447600	3293800	2571700	2036800	3244000	2022100
CDK4	2658200	3156200	3415700	0	0.77823	3156201	1.5781e+06	FALSE	2523300	0	2877100	3687700	2564000	2668000	2692300	2707900	0	2401500
TSEN34	4266600	3059800	4530400	0	0.941771	3059801	1.5299e+06	FALSE	5283600	2624700	6599400	3578200	5542100	5314500	3697500	3528300	3063900	2792200
PDS5A	3793300	2797000	5339000	0	0.710489	2797001	1.3985e+06	FALSE	4658200	0	4388500	2600700	3226100	4614100	3535900	4044600	0	0
PBRM1	2888000	2623200	3298600	0	0.875523	2623201	1.3116e+06	FALSE	3880600	2913600	4053100	2544500	4035200	3774200	3603500	3468200	2525000	1864500
TBX3	1913400	1808600	2340900	0	0.817378	1808601	904301	FALSE	2053800	1549000	2273000	1911200	2155200	2362200	2048700	0	0	0
ARID1B	16336000	12299000	20935000	4091600	0.78032	3.00591	1.89312	FALSE	23563000	8276400	28462000	24552000	16630000	17703000	17868000	13503000	12291000	5486000
NCOR2	14179000	11443000	14216000	5954500	0.997397	1.92174	1.45957	FALSE	12341000	5923500	16922000	12435000	10299000	16003000	9709200	7340500	10210000	4953100
U2AF2	9032500	6518300	9827500	3565100	0.919105	1.82836	1.37373	FALSE	8611400	8312400	8158300	30879000	5265500	8965100	5529400	5903200	8493500	5858300
TCF20	5166500	6050000	6717100	3154200	0.769156	1.91808	1.34362	FALSE	4915800	3913200	7318000	5646000	5114900	8169200	5739600	3750900	3118900	2086300
ARID1A	77722000	73699000	88549000	41407000	0.877729	1.77987	1.3288	FALSE	85800000	41995000	90296000	68653000	69543000	84207000	70761000	51239000	45666000	24494000
GSE1	5898900	4467000	7023900	2861700	0.839833	1.56096	1.2004	FALSE	7021900	3176200	10190000	3608400	7505300	7789500	6522400	4361100	3684400	3527300
RBM4	19728000	15625000	22275000	10928000	0.885657	1.42981	1.15773	FALSE	17878000	13282000	21480000	21784000	16071000	17697000	18694000	19326000	18448000	12584000
TRIM24	7919400	6604800	8180900	4940300	0.968035	1.33692	1.15248	FALSE	9201200	6036200	8350000	9145600	6369000	11877000	6898200	8483300	6974600	5838800
YWHAZ	12923000	7733100	10380000	7988900	1.24499	0.967981	1.10649	FALSE	10943000	11384000	7967400	0	7609200	11151000	11075000	12730000	10533000	0
SMARCE1	100870000	86649000	115290000	65884000	0.874924	1.31518	1.09505	FALSE	106590000	72135000	149240000	74413000	89235000	117950000	95128000	88934000	56068000	32231000
SEC22B	1615700	1895400	1680300	1581100	0.961555	1.19879	1.08017	FALSE	1678400	1684500	1617400	1683200	2281700	0	1479400	2301200	0	0
RBM8A	9000300	9072900	10556000	7006000	0.852624	1.29502	1.07382	FALSE	7348600	10477000	6378000	4703400	4748000	6377800	15504000	4136900	6729300	4595600
HMG20B	3407300	3063100	5497100	2057500	0.619836	1.48875	1.05429	FALSE	5859000	2227700	6458200	3266000	5065800	3591200	2222400	2202700	3109400	0
CTBP1	16047000	13347000	17013000	11578000	0.94322	1.15279	1.048	FALSE	20060000	12036000	19595000	9773800	15156000	15928000	18088000	15231000	13913000	12138000
TRIM33	10380000	12340000	12929000	9677200	0.802846	1.27516	1.039	FALSE	8435900	0	12255000	15260000	9510800	19056000	8233000	8878000	5583600	6116700
PDCD4	4136500	3053800	4468400	2652200	0.925723	1.15142	1.03857	FALSE	5366000	3202900	5515000	2987300	4106700	3282400	3452200	4638800	3503100	2175500
SNW1	9846800	4127800	8814000	4356600	1.11718	0.947482	1.03233	FALSE	7791800	5893500	7750700	4291100	7199200	7448200	5916900	5625200	5577600	0
PPIL4	5754600	5753200	6328000	4998100	0.909387	1.15108	1.03023	FALSE	6435000	0	5953300	0	5415600	6251200	6217600	4475800	4780700	0
MRTO4	1942900	1856600	1793400	1910500	1.08336	0.971788	1.02757	FALSE	1699600	1774600	1808900	0	2246000	1609800	1916900	1750900	1849000	0
SMARCA4	56576000	52840000	82292000	39930000	0.687503	1.32332	1.00541	FALSE	97457000	43717000	97112000	80609000	60887000	76917000	63801000	46009000	49830000	24199000
PSMA3	763370	705470	833890	690120	0.915433	1.02224	0.968838	FALSE	955860	799480	712010	868730	718420	727950	834050	0	0	0
LRPPRC	4015000	5206200	4747200	4869400	0.845762	1.06917	0.957464	FALSE	7896000	4848200	8926400	4622300	8668500	4495200	5837500	6785000	3431700	0
NAMPT	11172000	6376600	11235000	7027500	0.994393	0.907378	0.950885	FALSE	14338000	6939400	13342000	8192500	10861000	10563000	10386000	9302100	10350000	6013600
MARS	11953000	8045100	9810500	11890000	1.21839	0.676627	0.947508	FALSE	11799000	10918000	10483000	0	12642000	9452800	8765200	7990000	10174000	0
RECQL	5328300	5745300	8006200	4711900	0.665522	1.21932	0.942419	FALSE	12783000	5198000	7504000	5710100	5673400	7312700	6651300	4949500	4822500	3075500
MCM4	5527000	4823900	6218900	5236100	0.888742	0.921277	0.90501	FALSE	6639900	5816100	9892600	5595000	12953000	6869100	5761400	5287000	0	0
RNPEP	2152300	2460200	2582100	2675900	0.833546	0.919392	0.876469	FALSE	3540700	0	2540900	0	2426100	2099400	3843700	2011500	0	0
HMGB2	21359000	18903000	26715000	21489000	0.799513	0.879659	0.839586	FALSE	28477000	17707000	18122000	21833000	23871000	20600000	0	18490000	0	0
SHMT2	4167700	4641700	6266700	4990300	0.665055	0.930144	0.7976	FALSE	10751000	4118800	10170000	0	7609900	4888800	9969900	11785000	2879700	3805200
DCAF7	11167000	9662400	20181000	9564400	0.553342	1.01025	0.781794	FALSE	11693000	7806200	16646000	13277000	12054000	16682000	16204000	7199200	9123700	6240200
